# Supplementary material for: Phenotypic plasticity, spatial niches and cancer-associated fibroblast/mural cell interactions define the human prostate cancer microenvironment
Source: Research Square preprint supplement (doi:10.21203/rs.3.rs-3258823/v1), 2023-08-25
Supplement: Supplementary file 1 [file 53f064187132931840cfd61f.xlsx]

## Sheet: Information
Table	Sheet	Figure	Information
Table S1	Table S1	-	Patient metrics of primary fibroblast explant cultures
Table S2	Table S2	Fig. 1A-B	Explant dataset: annotation of different outgrowth primary fibroblast cultures to different clusters as determined by PCA, k-means and hierarchical clustering, including the "cycling" cluster (labeled herein "unknown")
Table S3	Table S3	Fig. 1C-G + Fig. S4A	Explant dataset: differential gene expression analysis performed using limma; this table contains the significantly upregulated genes for each cluster (NAF, CAF1, CAF2) with padj < 0.05 and logFC > 0.3; these genes were used as input for pathway analyses in Figure 2 J-K
Table S4	Table S4	Fig. S4B	Explant dataset: Gene Set Enrichment Analysis for GO: Biological Process performed using ClusterProfiler including the "cycling" cluster (labeled herein "unknown")
Table S5	Table S5	Fig. 1J-K and Fig. S4B	Explant dataset: Gene Set Enrichment Analysis for REACTOME, GO: Biological Process, Hallmark pathways performed using ClusterProfiler
Table S6	Table S6	Fig. 1H-I, Fig. S1E, Fig. 4I, Fig. S4D, Fig. S4I	Both datasets: published gene signatures used for comparison
Table S7	Table S7	Fig. 1M	Explant dataset: matrix of PROGENy analysis scores per sample
Table S8	Table S8	-	Explant dataset: genes upregulated in CAF1 compared to CAF2 (n=590 genes, logFC < -0.3, padj < 0.05); the analysis was performed for CAF2vsCAF1 (ie genes with a negative logFC are upregulated in CAF1)
Table S9	Table S9	Fig. 1L	Explant dataset: Gene Set Enrichment Analysis for Hallmark Pathways performed using ClusterProfiler; input = genes upregulated in CAF1 compared to CAF2 (n=590)
Table S10	Table S10	Fig. 1N-Q, Fig. S3G, Fig. 2K-L, Fig. S4M-O	Both datasets: marker genes used for TCGA and GEPIA2 survival analysis
Table S11	Table S11	Fig. 2D-E, Fig. S4A-C, Fig. S4G	scRNA-seq dataset: summary of cluster annotation, patient and pathology for each cell
Table S12	Table S12	Fig. 2A, Fig. S4E, Fig. 3A-B, Fig. S6A-B	scRNA-seq dataset: DEGs from FindAllMarkers function (Seurat); separate for Fibroblast and Mural cell clusters; min.pct = 0.1 & logfc.threshold = 0.2
Table S13	Table S13	Fig. 2A, Fig. S4E, Fig. 3A-B, Fig. S6A-B	scRNA-seq dataset: gene signatures used for comparisons with applied filters
Table S14	Table S14	Fig. 2H	scRNA-seq dataset: upregulated DEGs with p_val < 0.05 & avg_log2FC > 0 as input for pathway analysis
Table S15	Table S15	Fig. 2H	scRNA-seq dataset: output from clusterProfiler for the Hallmark, GOBP and Reactome pathways
Table S16	Table S16	-	TaqMan gene expression assays
Table S17	Table S17	-	Western blotting antibodies & staining conditions
Table S18	Table S18	-	In situ hybridization probes & immunohistochemistry/immunofluorescence antibodies

## Sheet: Table S1
	gleason score		age [years]			weight [kg]			height [cm]			BMI [kg/m2]			prostate weight [g]			prostate volume [ml]			PSA [ng/ml]			free PSA [ng/ml]			inflammation []
	score	n	mean	SD	n	mean	SD	n	mean	SD	n	mean	SD	n	mean	SD	n	mean	SD	n	mean	SD	n	mean	SD	n	mean	SD	n
	≤6	12	63.3833	6.95915	12	83	11.0041	11	174	4.30644	11	27.3773	3.1124	11	47.5455	18.2526	11	47	21.36	8	7.75545	7.10858	11	14.9818	4.74894	11	8.66667	10.1434	3
	7	35	63.8171	6.93741	35	85.0824	11.4871	34	177.265	6.26526	34	27.0509	3.0902	34	40.9714	11.1008	35	39.5455	11.346	33	8.90909	7.01944	34	10.5767	5.5346	31	8.6	10.2879	20
	3+4	22	64.9818	6.59529	22	84.1095	7.90647	21	176.381	5.29579	21	27.0538	2.55128	21	40.2727	11.5214	22	38.9048	11.8237	21	7.083	3.87404	21	9.8	4.97393	21	8.42857	10.4452	14
	4+3	13	61.8462	7.05567	13	86.6538	15.4961	13	178.692	7.35249	13	27.0462	3.8027	13	42.1538	10.242	13	40.6667	10.3629	12	11.7185	9.43208	13	12.13	6.22865	10	9	9.89949	6
	≥8	11	67.4	8.73166	11	78.3182	12.904	11	176.182	4.15207	11	25.2055	3.9037	11	45	14.7771	11	42.3	12.133	10	16.005	13.2225	10	12.2429	8.14982	7	19.3333	5.18545	3
	total	58	64.4069	7.45975	58	83.3446	11.9761	56	176.411	5.69704	56	26.7525	3.36078	56	43.0175	13.7617	57	41.2549	13.8208	51	9.98815	9.01179	55	11.8292	6.10594	49	9.84615	10.3986	26
	Gleason Score	T stage
		2a	2b	2c	3a	3b	4	n
	≤6		1	10	1			12
	7	3	1	14	12	5		35
	≥8	2		3	2	3	1	11
	n	5	2	27	15	8	1	58
	Gleason Score	N stage
		0	1	x	n
	≤6	2		10	12
	7	23	1	11	35
	≥8	7	3	1	11
	n	32	4	22	58

## Sheet: Table S2
ID	Array	Position	Cluster
89850	3998607028	A	CAF1
671300	3998607028	B	NAF
671390	3998607028	C	NAF
672180	3998607028	D	NAF
671030	3998607028	E	CAF2
649210	3998607028	F	NAF
671660	3998607028	G	NAF
671250	3998607028	H	NAF
364500	3998607028	I	NAF
672000	3998607028	J	unknown
130940	3998607028	K	CAF1
671760	3998607028	L	NAF
671820	3998607061	A	NAF
672030	3998607061	B	CAF1
633630	3998607061	C	CAF1
155660	3998607061	D	CAF1
672170	3998607061	E	CAF1
587300	3998607061	F	CAF2
418130	3998607061	G	CAF1
89851	3998607061	J	NAF
671301	3998607061	K	CAF2
671391	3998607061	L	NAF
672181	3998607066	A	CAF1
671031	3998607066	B	CAF1
649211	3998607066	C	NAF
671661	3998607066	D	NAF
671251	3998607066	E	NAF
364501	3998607066	F	CAF1
672001	3998607066	G	NAF
130941	3998607066	H	NAF
671761	3998607066	I	CAF2
671821	3998607066	J	CAF2
672031	3998607066	K	NAF
633631	3998607066	L	NAF
155661	3998607067	A	NAF
672171	3998607067	B	CAF1
587301	3998607067	C	unknown
418131	3998607067	D	NAF

## Sheet: Table S3
gene	logFC	AveExpr	t	P.Value	adj.P.Val	B	comparison
LZTS1	0.975795	4.71671	16.9445	4.54348e-19	1.42784e-14	32.0193	CAF2vsALL
FOXS1	2.75926	4.95963	16.0004	2.97746e-18	3.91434e-14	30.377	CAF2vsALL
HEYL	2.48987	5.0506	15.8892	3.73672e-18	3.91434e-14	30.177	CAF2vsALL
M160	1.34043	4.73451	13.1004	1.68173e-15	1.32125e-11	24.6846	CAF2vsALL
SEPT5	1.86263	5.31047	12.7276	4.06345e-15	2.55396e-11	23.8754	CAF2vsALL
PPFIBP2	1.71805	5.20757	12.37	9.62199e-15	5.03968e-11	23.0813	CAF2vsALL
EFHD1	3.53185	5.38277	11.9918	2.43495e-14	8.82734e-11	22.2224	CAF2vsALL
ZNF423	0.834405	4.70724	11.9916	2.43662e-14	8.82734e-11	22.2217	CAF2vsALL
PDGFA	0.641569	4.70872	11.9767	2.52804e-14	8.82734e-11	22.1876	CAF2vsALL
EPHB1	0.529462	4.64359	11.7511	4.43773e-14	1.26782e-10	21.6652	CAF2vsALL
CD163L1	0.954106	4.6709	11.7085	4.93983e-14	1.29366e-10	21.5656	CAF2vsALL
DAAM2	1.26159	5.03617	11.2126	1.74534e-13	3.56454e-10	20.3888	CAF2vsALL
RGS7	1.25045	4.82969	11.2095	1.75936e-13	3.56454e-10	20.3813	CAF2vsALL
LOC100129667	0.925164	4.84889	11.1975	1.81482e-13	3.56454e-10	20.3523	CAF2vsALL
LPPR4	2.24336	5.24423	10.2985	1.94298e-12	3.39223e-09	18.1261	CAF2vsALL
HSPB2	1.2162	5.43973	9.82447	7.07674e-12	1.06567e-08	16.9048	CAF2vsALL
NTF3	1.97084	5.1298	9.8222	7.12121e-12	1.06567e-08	16.8988	CAF2vsALL
KCNMB1	2.46738	5.04811	9.67709	1.06401e-11	1.51989e-08	16.5184	CAF2vsALL
CRIP1	2.61431	5.65042	9.65954	1.11718e-11	1.52645e-08	16.4722	CAF2vsALL
FRMD4A	1.37067	5.77445	9.61856	1.25206e-11	1.5739e-08	16.3641	CAF2vsALL
FAM46B	0.907927	4.98622	9.46059	1.94689e-11	2.35319e-08	15.9452	CAF2vsALL
KCNE4	0.7094	4.83976	9.37767	2.45766e-11	2.68571e-08	15.724	CAF2vsALL
FGF1	0.433906	4.71557	9.37649	2.46586e-11	2.68571e-08	15.7208	CAF2vsALL
STAT4	0.859984	4.99234	9.30151	3.04645e-11	3.19126e-08	15.5198	CAF2vsALL
COL5A3	1.11191	4.87113	9.26113	3.41491e-11	3.46184e-08	15.4113	CAF2vsALL
S1PR5	0.649593	4.58291	9.21283	3.91572e-11	3.84549e-08	15.2811	CAF2vsALL
C1orf183	0.301569	4.63695	9.17918	4.30813e-11	4.10265e-08	15.1903	CAF2vsALL
PGBD3	1.09457	5.14287	9.11507	5.16999e-11	4.77859e-08	15.0167	CAF2vsALL
NRXN2	0.403209	4.61017	9.06458	5.97067e-11	5.24626e-08	14.8796	CAF2vsALL
NDUFA4L2	2.24895	5.20007	8.87158	1.03833e-10	8.58696e-08	14.3523	CAF2vsALL
OXSR1	0.62663	7.1579	8.81124	1.23559e-10	9.65926e-08	14.1864	CAF2vsALL
C3orf54	0.728936	5.39314	8.78851	1.31941e-10	9.87233e-08	14.1238	CAF2vsALL
LOC652694	0.765598	5.14649	8.73283	1.54998e-10	1.13278e-07	13.9701	CAF2vsALL
TPST2	1.26158	6.35744	8.57013	2.48692e-10	1.73675e-07	13.5187	CAF2vsALL
PDE3A	0.399502	4.62668	8.50385	3.01792e-10	1.97586e-07	13.3337	CAF2vsALL
LOC400406	0.871144	4.87558	8.36065	4.5927e-10	2.83e-07	12.9322	CAF2vsALL
C5orf13	1.77767	7.60283	8.30125	5.4703e-10	3.28633e-07	12.7649	CAF2vsALL
NTN4	1.92819	6.70307	8.29115	5.63561e-10	3.28633e-07	12.7365	CAF2vsALL
FOXC2	0.815007	4.94713	8.10532	9.76714e-10	5.29211e-07	12.2099	CAF2vsALL
MYO1B	1.12174	6.75305	8.09638	1.00299e-09	5.34239e-07	12.1845	CAF2vsALL
ZFHX3	0.851995	6.33577	8.0249	1.24061e-09	6.4979e-07	11.9808	CAF2vsALL
LOC100132439	0.561203	4.81299	8.00503	1.31629e-09	6.78129e-07	11.9241	CAF2vsALL
DSP	1.2017	4.90583	7.97778	1.42773e-09	7.16956e-07	11.8462	CAF2vsALL
TRIM32	0.441034	6.11668	7.97554	1.43729e-09	7.16956e-07	11.8398	CAF2vsALL
KLHL30	1.30268	4.84447	7.95426	1.53154e-09	7.48274e-07	11.7789	CAF2vsALL
MTMR9	0.458235	5.91897	7.93142	1.63971e-09	7.80752e-07	11.7135	CAF2vsALL
CRYAB	1.74875	7.14716	7.91781	1.7078e-09	8.01035e-07	11.6744	CAF2vsALL
CDK5R1	0.416789	4.73821	7.86705	1.98797e-09	9.05422e-07	11.5288	CAF2vsALL
HCP5	0.875694	4.92584	7.8114	2.34899e-09	1.03971e-06	11.3687	CAF2vsALL
SLC29A2	0.504036	4.76653	7.72205	3.07279e-09	1.28754e-06	11.111	CAF2vsALL
HECW2	1.11173	5.00115	7.68384	3.44771e-09	1.40712e-06	11.0005	CAF2vsALL
YWHAH	0.533022	8.68664	7.65489	3.7623e-09	1.51582e-06	10.9167	CAF2vsALL
MOBKL3	0.478263	6.60437	7.63731	3.96727e-09	1.57817e-06	10.8658	CAF2vsALL
ERCC6	0.598989	4.78319	7.59261	4.54102e-09	1.70381e-06	10.7361	CAF2vsALL
AK3L1	0.970368	5.12895	7.59091	4.5644e-09	1.70381e-06	10.7312	CAF2vsALL
NGF	1.69186	5.69933	7.58527	4.6429e-09	1.70381e-06	10.7148	CAF2vsALL
FTSJ1	0.683203	5.74506	7.58467	4.65135e-09	1.70381e-06	10.7131	CAF2vsALL
C3orf21	0.690128	6.51373	7.58387	4.66262e-09	1.70381e-06	10.7107	CAF2vsALL
HHIP	1.14984	4.75301	7.57091	4.8491e-09	1.75158e-06	10.6731	CAF2vsALL
SYDE1	0.483486	6.69472	7.54567	5.23399e-09	1.86913e-06	10.5997	CAF2vsALL
MYO1E	0.384634	4.92432	7.5143	5.75586e-09	2.0324e-06	10.5085	CAF2vsALL
ACTR2	0.390866	8.28595	7.49024	6.19149e-09	2.13528e-06	10.4384	CAF2vsALL
JUB	0.564617	5.27563	7.48709	6.25105e-09	2.13528e-06	10.4292	CAF2vsALL
LOC649366	2.94847	5.70629	7.41569	7.76489e-09	2.51751e-06	10.2208	CAF2vsALL
CCNYL1	0.877439	5.76564	7.41207	7.8507e-09	2.51751e-06	10.2103	CAF2vsALL
UGP2	0.504501	6.75796	7.30194	1.09797e-08	3.41632e-06	9.88792	CAF2vsALL
ACAN	0.555457	4.56287	7.26345	1.23486e-08	3.73141e-06	9.77499	CAF2vsALL
CYFIP2	1.20057	5.19935	7.25554	1.26504e-08	3.78622e-06	9.75177	CAF2vsALL
ANKRD6	0.760588	4.73006	7.251	1.28271e-08	3.80288e-06	9.73844	CAF2vsALL
KIT	1.08772	5.15869	7.23616	1.34222e-08	3.90563e-06	9.69484	CAF2vsALL
DNM1L	0.359805	6.12087	7.22434	1.39164e-08	4.01226e-06	9.66008	CAF2vsALL
LOC440160	1.02991	5.4052	7.20087	1.49521e-08	4.27167e-06	9.59107	CAF2vsALL
DMPK	0.503645	4.87953	7.18493	1.56994e-08	4.4316e-06	9.54417	CAF2vsALL
ID4	1.02012	4.90952	7.18297	1.57939e-08	4.4316e-06	9.5384	CAF2vsALL
SDC2	1.31255	6.13958	7.17115	1.63758e-08	4.51426e-06	9.50361	CAF2vsALL
MICAL2	1.08464	5.41983	7.15637	1.71344e-08	4.64194e-06	9.46007	CAF2vsALL
EBI2	0.857404	4.7249	7.14225	1.7892e-08	4.79965e-06	9.41847	CAF2vsALL
TFAP2A	0.512443	4.74993	7.11488	1.94577e-08	5.01212e-06	9.33779	CAF2vsALL
LOC729143	0.428346	5.05048	7.10228	2.02244e-08	5.16724e-06	9.30063	CAF2vsALL
C21orf7	2.27561	5.92519	7.09276	2.08239e-08	5.23529e-06	9.27253	CAF2vsALL
LOC729905	0.463775	4.81567	7.0801	2.16486e-08	5.35691e-06	9.23518	CAF2vsALL
NRXN3	0.588549	4.72729	7.05967	2.30499e-08	5.65912e-06	9.17485	CAF2vsALL
PRKAB2	0.572105	5.88982	7.03111	2.51644e-08	6.13036e-06	9.09043	CAF2vsALL
PDIA5	0.599369	6.26849	7.01907	2.61132e-08	6.28885e-06	9.05483	CAF2vsALL
DYSF	1.06834	4.91451	6.99559	2.80677e-08	6.58637e-06	8.9854	CAF2vsALL
CHSY3	1.18977	5.226	6.96198	3.11263e-08	7.13996e-06	8.88589	CAF2vsALL
MOCS1	0.67415	5.53498	6.94295	3.30054e-08	7.51615e-06	8.82949	CAF2vsALL
AFAP1L2	1.01559	4.78692	6.93526	3.37958e-08	7.64076e-06	8.80673	CAF2vsALL
HSPB7	1.57425	5.44732	6.92263	3.5137e-08	7.8313e-06	8.76928	CAF2vsALL
LOC643911	0.519146	4.91037	6.91829	3.56102e-08	7.87442e-06	8.75641	CAF2vsALL
TRAM2	0.7098	7.28923	6.90644	3.6935e-08	8.06054e-06	8.72127	CAF2vsALL
FLJ14213	1.01072	4.92449	6.90387	3.72292e-08	8.06872e-06	8.71363	CAF2vsALL
C1orf71	0.624578	6.67075	6.88535	3.94168e-08	8.36968e-06	8.65869	CAF2vsALL
NEK7	0.620989	5.51361	6.86882	4.14787e-08	8.74838e-06	8.60963	CAF2vsALL
ADAMTS7	0.452125	4.70366	6.85837	4.28372e-08	8.83975e-06	8.57862	CAF2vsALL
TLR4	0.607855	4.72715	6.85057	4.38809e-08	8.83975e-06	8.55545	CAF2vsALL
SEMA5B	0.771831	4.67245	6.82942	4.68426e-08	9.37628e-06	8.4926	CAF2vsALL
CLASP2	0.374472	5.2036	6.81208	4.94188e-08	9.76752e-06	8.44108	CAF2vsALL
ESAM	1.19646	4.89734	6.77557	5.53218e-08	1.07473e-05	8.33249	CAF2vsALL
SNTA1	0.469503	5.57946	6.77172	5.5984e-08	1.07936e-05	8.32104	CAF2vsALL
B3GNT2	0.515336	5.23474	6.76835	5.65705e-08	1.08402e-05	8.31101	CAF2vsALL
VGLL4	0.606751	6.27928	6.74318	6.11514e-08	1.16469e-05	8.23607	CAF2vsALL
C7orf10	1.39395	6.65137	6.72023	6.56522e-08	1.22809e-05	8.16771	CAF2vsALL
PCGF5	0.440834	5.26639	6.71046	6.76674e-08	1.25089e-05	8.13862	CAF2vsALL
STK38L	0.769003	4.88692	6.70332	6.91798e-08	1.26312e-05	8.11734	CAF2vsALL
TSC22D3	0.848137	5.46196	6.67698	7.50586e-08	1.34788e-05	8.03884	CAF2vsALL
CCDC81	1.17451	5.10392	6.65904	7.93499e-08	1.40884e-05	7.98532	CAF2vsALL
RAB33A	0.83491	4.92362	6.65457	8.04573e-08	1.42048e-05	7.97198	CAF2vsALL
B3GALTL	0.565392	4.94311	6.6436	8.32386e-08	1.46137e-05	7.93927	CAF2vsALL
KRT80	0.524705	4.74659	6.63197	8.62959e-08	1.49412e-05	7.90455	CAF2vsALL
LOC645233	0.459429	5.44449	6.61143	9.19693e-08	1.57078e-05	7.84325	CAF2vsALL
SEPT11	0.704441	7.78876	6.59123	9.79189e-08	1.65441e-05	7.78291	CAF2vsALL
GPR21	0.450076	4.64937	6.5411	1.14403e-07	1.90223e-05	7.63314	CAF2vsALL
PPP3CC	0.397171	6.31454	6.53294	1.1734e-07	1.9408e-05	7.60873	CAF2vsALL
ANKRD1	2.12668	5.74379	6.52568	1.20017e-07	1.9644e-05	7.58701	CAF2vsALL
CDR2L	0.585758	6.78315	6.4921	1.33217e-07	2.15798e-05	7.48656	CAF2vsALL
LDHA	0.551663	8.91914	6.47951	1.38532e-07	2.23257e-05	7.4489	CAF2vsALL
RAB2B	0.337541	7.46017	6.4638	1.45467e-07	2.31312e-05	7.40187	CAF2vsALL
DYRK2	0.64738	6.06444	6.4632	1.45739e-07	2.31312e-05	7.40007	CAF2vsALL
MTMR2	0.301897	5.31196	6.45823	1.48009e-07	2.33516e-05	7.38519	CAF2vsALL
JAG1	1.34933	6.10643	6.45692	1.48613e-07	2.33516e-05	7.38127	CAF2vsALL
SLC24A3	1.79693	5.37109	6.45171	1.51037e-07	2.3605e-05	7.3657	CAF2vsALL
RNF182	0.552239	4.71722	6.43461	1.59288e-07	2.45382e-05	7.31449	CAF2vsALL
TRIB2	0.535755	5.36346	6.4265	1.63359e-07	2.50426e-05	7.29019	CAF2vsALL
SCHIP1	0.764465	5.71821	6.42236	1.65478e-07	2.52442e-05	7.27778	CAF2vsALL
RABGAP1	1.05141	6.64771	6.39376	1.80877e-07	2.70678e-05	7.19212	CAF2vsALL
PRKCH	0.619247	5.00777	6.38509	1.85827e-07	2.7585e-05	7.16612	CAF2vsALL
KLF2	1.28913	7.80687	6.38423	1.86324e-07	2.7585e-05	7.16355	CAF2vsALL
PREI3	0.516103	6.09185	6.37024	1.9462e-07	2.85801e-05	7.12161	CAF2vsALL
ENTPD1	0.615628	4.66453	6.36459	1.98072e-07	2.89517e-05	7.10469	CAF2vsALL
LOC100131139	1.06179	4.89856	6.35956	2.01203e-07	2.91607e-05	7.08959	CAF2vsALL
C1orf110	0.646066	4.57172	6.35931	2.01358e-07	2.91607e-05	7.08885	CAF2vsALL
LOC646576	1.21215	5.18665	6.34746	2.08928e-07	3.01182e-05	7.05332	CAF2vsALL
ELN	1.3267	5.11704	6.34428	2.11004e-07	3.02785e-05	7.0438	CAF2vsALL
CECR5	0.474206	5.88217	6.3343	2.17669e-07	3.1093e-05	7.01386	CAF2vsALL
MTP18	0.461974	5.00915	6.31736	2.29467e-07	3.20096e-05	6.96304	CAF2vsALL
MPRIP	0.712292	7.23161	6.31634	2.30197e-07	3.20096e-05	6.95998	CAF2vsALL
CALM1	0.498619	8.13664	6.31265	2.32855e-07	3.22366e-05	6.94893	CAF2vsALL
KIAA1600	0.337636	7.06238	6.30704	2.36964e-07	3.2519e-05	6.93209	CAF2vsALL
POLE3	0.398378	7.23786	6.28952	2.50259e-07	3.4194e-05	6.87953	CAF2vsALL
LOC649021	0.343373	4.62079	6.28494	2.5386e-07	3.43478e-05	6.86578	CAF2vsALL
LASP1	0.44535	9.05805	6.28393	2.54663e-07	3.43478e-05	6.86274	CAF2vsALL
OLFM2	0.519623	4.66025	6.24567	2.86922e-07	3.80457e-05	6.74791	CAF2vsALL
DLC1	0.642669	4.96508	6.22141	3.09473e-07	4.05229e-05	6.67507	CAF2vsALL
PLS3	0.598558	7.9768	6.21652	3.14232e-07	4.09753e-05	6.66038	CAF2vsALL
THBS1	0.892182	8.66533	6.21415	3.1656e-07	4.11084e-05	6.65327	CAF2vsALL
C11orf41	0.577362	4.72335	6.2033	3.27461e-07	4.21754e-05	6.62068	CAF2vsALL
GLIPR1	0.955438	7.28146	6.18519	3.46495e-07	4.40848e-05	6.56628	CAF2vsALL
CHIC2	0.550043	7.40327	6.16609	3.67774e-07	4.60465e-05	6.5089	CAF2vsALL
FHOD1	0.456736	5.54471	6.15275	3.83411e-07	4.78137e-05	6.46882	CAF2vsALL
C20orf117	0.38305	5.27081	6.14501	3.92777e-07	4.85961e-05	6.44558	CAF2vsALL
HEPH	0.781997	4.76937	6.14014	3.98797e-07	4.90035e-05	6.43094	CAF2vsALL
MMP11	1.24595	5.23869	6.13927	3.99888e-07	4.90035e-05	6.42831	CAF2vsALL
LOC286016	0.573524	6.56642	6.13619	4.03741e-07	4.91517e-05	6.41908	CAF2vsALL
LOC100131727	0.502644	5.13764	6.13513	4.05088e-07	4.91517e-05	6.41587	CAF2vsALL
LRRC32	1.74626	6.67644	6.12494	4.1817e-07	5.01581e-05	6.38528	CAF2vsALL
MGC42630	0.460039	4.87625	6.1217	4.22428e-07	5.04761e-05	6.37552	CAF2vsALL
FH	0.45059	7.73052	6.11698	4.28693e-07	5.10307e-05	6.36135	CAF2vsALL
KATNAL1	0.538656	5.53634	6.10415	4.46219e-07	5.27617e-05	6.32278	CAF2vsALL
KLF13	0.565876	5.81049	6.1017	4.49652e-07	5.29242e-05	6.3154	CAF2vsALL
MAP2K1	0.35977	7.1394	6.09838	4.54328e-07	5.3275e-05	6.30544	CAF2vsALL
CD59	0.683668	6.01834	6.09209	4.63343e-07	5.41302e-05	6.28653	CAF2vsALL
S100A3	0.883763	5.40145	6.0776	4.84791e-07	5.60112e-05	6.24297	CAF2vsALL
PUS7	0.456382	5.87928	6.05665	5.17569e-07	5.95792e-05	6.17999	CAF2vsALL
ANP32A	0.401678	5.04916	6.03016	5.62228e-07	6.37855e-05	6.10032	CAF2vsALL
FGD4	0.335136	4.68072	5.99153	6.34338e-07	7.09418e-05	5.98416	CAF2vsALL
PSME3	0.328224	6.16709	5.9904	6.36593e-07	7.09418e-05	5.98075	CAF2vsALL
MARK1	0.445045	4.66643	5.97108	6.76199e-07	7.45622e-05	5.92265	CAF2vsALL
PEAR1	1.21424	5.30099	5.94132	7.42104e-07	8.15432e-05	5.83314	CAF2vsALL
MEX3B	1.03109	5.63705	5.93429	7.58588e-07	8.30641e-05	5.812	CAF2vsALL
NAT12	0.516645	5.43489	5.92675	7.76693e-07	8.4458e-05	5.7893	CAF2vsALL
DOCK5	0.457213	5.19138	5.91745	7.99581e-07	8.63777e-05	5.76135	CAF2vsALL
NOTCH3	1.58978	6.44099	5.91441	8.07219e-07	8.67745e-05	5.7522	CAF2vsALL
SOX11	0.718049	4.73034	5.91369	8.09041e-07	8.67745e-05	5.75003	CAF2vsALL
FN1	0.701916	5.30934	5.91127	8.15184e-07	8.7136e-05	5.74275	CAF2vsALL
ATP7B	0.31935	4.67079	5.90671	8.26885e-07	8.78604e-05	5.72903	CAF2vsALL
ITGA11	1.66047	6.34664	5.90625	8.28075e-07	8.78604e-05	5.72765	CAF2vsALL
BCAR1	0.435718	5.71661	5.90537	8.30348e-07	8.78604e-05	5.72501	CAF2vsALL
FOXD1	1.21591	5.58539	5.89852	8.48318e-07	8.91613e-05	5.70441	CAF2vsALL
SLC25A4	0.724681	7.16121	5.89463	8.58702e-07	8.99519e-05	5.6927	CAF2vsALL
PTK2	0.660397	6.99582	5.88728	8.78665e-07	9.17373e-05	5.67058	CAF2vsALL
OSBPL9	0.577738	6.34525	5.88237	8.92255e-07	9.26799e-05	5.65581	CAF2vsALL
RNF144B	0.414075	4.6102	5.88189	8.93592e-07	9.26799e-05	5.65437	CAF2vsALL
APOLD1	0.820493	5.24401	5.87297	9.18872e-07	9.4677e-05	5.62752	CAF2vsALL
SLC29A1	0.644197	5.27265	5.86875	9.31056e-07	9.56189e-05	5.61485	CAF2vsALL
ARPC5	0.381235	8.74928	5.86196	9.51049e-07	9.67885e-05	5.5944	CAF2vsALL
EDN1	1.41717	5.01959	5.85662	9.67056e-07	9.7966e-05	5.57834	CAF2vsALL
FOXE1	0.460627	4.6047	5.85581	9.69497e-07	9.7966e-05	5.57591	CAF2vsALL
GADD45GIP1	0.326105	5.72269	5.84912	9.89979e-07	9.9715e-05	5.5558	CAF2vsALL
OSTN	0.64589	4.57887	5.828	1.05756e-06	0.000104842	5.49226	CAF2vsALL
DIAPH3	0.484841	5.29211	5.82512	1.06713e-06	0.000105458	5.48359	CAF2vsALL
CDK2AP2	0.425402	5.29038	5.81276	1.10915e-06	0.000108926	5.44642	CAF2vsALL
B3GALT6	0.343441	6.14965	5.80605	1.13265e-06	0.000109785	5.42625	CAF2vsALL
AXL	0.616	8.34917	5.80529	1.13537e-06	0.000109785	5.42395	CAF2vsALL
SMARCD3	0.380761	5.64823	5.79933	1.1567e-06	0.000111456	5.40603	CAF2vsALL
C1orf77	0.304096	6.4288	5.79499	1.17252e-06	0.000111718	5.39296	CAF2vsALL
FEM1C	0.330429	6.23205	5.79482	1.17313e-06	0.000111718	5.39246	CAF2vsALL
CRIP2	1.63608	6.4507	5.79183	1.18416e-06	0.000112267	5.38346	CAF2vsALL
EHD3	0.520836	5.06424	5.7825	1.21919e-06	0.000114713	5.35541	CAF2vsALL
KCTD20	0.935454	6.34877	5.77697	1.24048e-06	0.000115894	5.33876	CAF2vsALL
EBF1	1.53318	5.64281	5.77668	1.2416e-06	0.000115894	5.33789	CAF2vsALL
RGS16	0.352874	4.54133	5.7738	1.25282e-06	0.000116483	5.32923	CAF2vsALL
NAP1L3	1.06092	5.24438	5.7586	1.3138e-06	0.000121434	5.2835	CAF2vsALL
CXXC5	1.22932	7.10254	5.75578	1.32542e-06	0.000122149	5.27503	CAF2vsALL
GJA4	0.430575	4.59846	5.75433	1.33143e-06	0.000122299	5.27068	CAF2vsALL
DACT1	1.20671	5.71837	5.75351	1.33484e-06	0.000122299	5.26822	CAF2vsALL
CSPG4	1.46393	5.98162	5.72574	1.45591e-06	0.000131475	5.1847	CAF2vsALL
SACS	0.635036	5.73735	5.72066	1.47924e-06	0.000133199	5.16941	CAF2vsALL
ATP8B1	0.492878	4.91796	5.71263	1.51682e-06	0.000135791	5.14527	CAF2vsALL
BNIP3	0.663176	7.91067	5.71193	1.52014e-06	0.000135791	5.14317	CAF2vsALL
C2orf27A	0.427028	4.65727	5.71175	1.52098e-06	0.000135791	5.14264	CAF2vsALL
LOC729666	0.350312	4.67292	5.69845	1.58557e-06	0.000139991	5.10263	CAF2vsALL
CD58	0.539911	5.6808	5.69839	1.58584e-06	0.000139991	5.10247	CAF2vsALL
SGCA	0.804177	4.79239	5.66438	1.76374e-06	0.00015504	5.0002	CAF2vsALL
PMEPA1	0.701828	4.88345	5.66393	1.76619e-06	0.00015504	4.99887	CAF2vsALL
KLHDC8B	0.467563	6.13897	5.65585	1.81136e-06	0.000157197	4.97458	CAF2vsALL
UBE2N	0.316865	6.86372	5.62661	1.98468e-06	0.000170187	4.8867	CAF2vsALL
GLRX5	0.30449	8.07722	5.61396	2.06472e-06	0.000175367	4.84868	CAF2vsALL
EIF4E2	0.430318	7.48696	5.60741	2.1074e-06	0.00017803	4.829	CAF2vsALL
HIF1A	0.75499	7.02485	5.60184	2.14442e-06	0.000180672	4.81226	CAF2vsALL
PPP1R14A	2.27286	5.91949	5.59985	2.15781e-06	0.000181313	4.80627	CAF2vsALL
CPE	2.01422	5.82755	5.59749	2.17378e-06	0.000182168	4.79918	CAF2vsALL
ITGA7	0.407398	4.76377	5.58854	2.23541e-06	0.000185212	4.7723	CAF2vsALL
LOC646249	0.307426	4.56675	5.58809	2.23853e-06	0.000185212	4.77096	CAF2vsALL
RIMKLB	0.468167	5.19204	5.58794	2.23957e-06	0.000185212	4.77051	CAF2vsALL
ENDOG	0.320837	5.4015	5.57309	2.3459e-06	0.000191486	4.72591	CAF2vsALL
ZEB2	0.487423	5.91448	5.57223	2.35223e-06	0.000191506	4.72332	CAF2vsALL
RDH5	0.971727	5.30274	5.57055	2.36464e-06	0.000192019	4.71826	CAF2vsALL
LOC100128918	0.402525	4.81781	5.56256	2.42437e-06	0.000196361	4.69427	CAF2vsALL
ATXN1	0.522828	6.01123	5.56011	2.44303e-06	0.000197364	4.6869	CAF2vsALL
PURB	0.38907	6.97197	5.55424	2.48824e-06	0.000200501	4.66927	CAF2vsALL
LOC647543	0.420497	4.73223	5.54398	2.56923e-06	0.000206497	4.63848	CAF2vsALL
SASH1	0.929339	6.67733	5.53005	2.68345e-06	0.000213494	4.59666	CAF2vsALL
HMG20B	0.336629	6.49038	5.52755	2.70449e-06	0.000214625	4.58915	CAF2vsALL
MEGF6	1.13322	5.02288	5.52252	2.74738e-06	0.000215848	4.57403	CAF2vsALL
ENO1	0.360282	9.26918	5.51669	2.79778e-06	0.000219104	4.55655	CAF2vsALL
CD97	0.945692	6.57901	5.51283	2.83177e-06	0.000220822	4.54494	CAF2vsALL
SPC25	0.563218	4.96062	5.5054	2.89823e-06	0.000224318	4.52264	CAF2vsALL
SLC1A4	0.698323	5.37711	5.50396	2.91123e-06	0.000224318	4.51834	CAF2vsALL
ANKRD52	0.327387	5.00759	5.50385	2.9123e-06	0.000224318	4.51799	CAF2vsALL
SERTAD4	1.27228	5.58585	5.50104	2.93791e-06	0.000224657	4.50957	CAF2vsALL
HIVEP1	0.493544	5.11225	5.50102	2.93815e-06	0.000224657	4.50949	CAF2vsALL
SMAD7	0.389991	5.76313	5.495	2.99389e-06	0.000227705	4.49143	CAF2vsALL
PPP1R13L	0.67972	5.18949	5.4931	3.01163e-06	0.000228056	4.48575	CAF2vsALL
RNMTL1	0.541437	5.78492	5.49221	3.02007e-06	0.000228146	4.48306	CAF2vsALL
CHST3	0.467044	5.93557	5.48147	3.12302e-06	0.000234234	4.45084	CAF2vsALL
NCALD	0.65263	4.68837	5.47242	3.21249e-06	0.000240371	4.42369	CAF2vsALL
REEP1	0.381987	4.51674	5.461	3.32914e-06	0.000247332	4.38942	CAF2vsALL
RPL39L	0.646927	6.29801	5.44402	3.51024e-06	0.000257139	4.33851	CAF2vsALL
B3GALT2	1.05599	5.43933	5.40203	4.00165e-06	0.000288431	4.21261	CAF2vsALL
TUSC1	0.567151	5.41467	5.39117	4.13939e-06	0.000296997	4.18009	CAF2vsALL
HEY2	0.577084	4.53482	5.38662	4.1986e-06	0.000299196	4.16645	CAF2vsALL
PCNT	0.330145	6.0503	5.3762	4.33721e-06	0.000305489	4.13524	CAF2vsALL
BEX1	1.33336	6.54257	5.35241	4.67121e-06	0.000325493	4.06398	CAF2vsALL
FMN2	0.886703	5.35067	5.34738	4.74496e-06	0.000329901	4.04893	CAF2vsALL
PDLIM5	0.621809	5.36548	5.33706	4.90009e-06	0.000339934	4.01803	CAF2vsALL
DUSP23	0.581088	6.33605	5.32535	5.08223e-06	0.000351793	3.98298	CAF2vsALL
MAMDC2	1.153	5.3653	5.31125	5.31041e-06	0.000365175	3.9408	CAF2vsALL
SORBS2	1.18034	5.24075	5.28778	5.7132e-06	0.000386464	3.87059	CAF2vsALL
RGS4	1.94474	7.50987	5.28749	5.71837e-06	0.000386464	3.86972	CAF2vsALL
SEPT7	0.449982	6.47857	5.27723	5.90397e-06	0.000397298	3.83905	CAF2vsALL
COL22A1	0.363366	4.55404	5.27042	6.03064e-06	0.000404955	3.81866	CAF2vsALL
LOC646110	0.533592	4.67472	5.26715	6.09225e-06	0.000407351	3.8089	CAF2vsALL
TMSB15A	1.05007	5.20805	5.25394	6.34794e-06	0.000423546	3.76943	CAF2vsALL
NEDD9	0.586187	4.84093	5.24386	6.55032e-06	0.000435132	3.7393	CAF2vsALL
DCK	0.351655	5.26588	5.24115	6.60577e-06	0.000437037	3.73121	CAF2vsALL
CLEC3B	1.19335	5.15008	5.23491	6.73537e-06	0.000443744	3.71256	CAF2vsALL
RCAN2	1.49468	5.91011	5.23227	6.79087e-06	0.000446464	3.70468	CAF2vsALL
DBNDD2	0.878534	7.44165	5.22476	6.95146e-06	0.000455079	3.68225	CAF2vsALL
ENAH	0.411974	5.14336	5.21939	7.06846e-06	0.000458953	3.66622	CAF2vsALL
COL4A2	1.15644	6.75738	5.21545	7.15562e-06	0.000463263	3.65446	CAF2vsALL
PLAC9	1.24935	6.22585	5.20781	7.32777e-06	0.000472859	3.63164	CAF2vsALL
MCAM	0.673401	4.89052	5.20494	7.39353e-06	0.000476125	3.62307	CAF2vsALL
C4orf47	0.376096	4.65368	5.20097	7.4852e-06	0.000480006	3.61124	CAF2vsALL
SEMA5A	0.931132	5.54203	5.19811	7.55227e-06	0.000481415	3.60268	CAF2vsALL
STC2	1.30235	7.8418	5.18995	7.74622e-06	0.000490792	3.57834	CAF2vsALL
FLI1	0.596987	4.96983	5.18065	7.97343e-06	0.000503159	3.5506	CAF2vsALL
FADS3	0.313274	4.96538	5.17535	8.10594e-06	0.000509474	3.53478	CAF2vsALL
LANCL2	0.405048	5.28219	5.17248	8.17863e-06	0.000513017	3.52621	CAF2vsALL
AP4B1	0.338836	5.82709	5.16244	8.43781e-06	0.00052717	3.49628	CAF2vsALL
IL17B	0.301686	4.55726	5.15322	8.68299e-06	0.000539272	3.46879	CAF2vsALL
FAM176A	0.818516	5.6556	5.15025	8.76352e-06	0.0005432	3.45994	CAF2vsALL
DOCK7	0.476361	6.4318	5.14802	8.8243e-06	0.000544818	3.45331	CAF2vsALL
LOC729406	0.556048	6.50507	5.14207	8.98901e-06	0.000550786	3.43556	CAF2vsALL
GEM	0.9356	5.74081	5.14199	8.99106e-06	0.000550786	3.43534	CAF2vsALL
SLC30A3	0.512966	4.82193	5.13749	9.11764e-06	0.000555704	3.42193	CAF2vsALL
EPS8	0.610179	6.47115	5.13548	9.17491e-06	0.000557551	3.41592	CAF2vsALL
ARHGAP24	0.545023	5.37585	5.13494	9.19021e-06	0.000557551	3.41433	CAF2vsALL
PLOD1	0.578925	8.13248	5.1197	9.63552e-06	0.000579402	3.36893	CAF2vsALL
OLFML2B	0.864247	5.21477	5.11853	9.67069e-06	0.000579983	3.36544	CAF2vsALL
HNRNPH3	0.309966	6.57283	5.10716	1.00181e-05	0.000599673	3.33158	CAF2vsALL
ZNF22	0.408605	6.47986	5.10623	1.00468e-05	0.00060025	3.32884	CAF2vsALL
TCEAL3	0.340582	7.68632	5.09679	1.03457e-05	0.000614599	3.30072	CAF2vsALL
LRRC8A	0.428962	5.97291	5.0922	1.04941e-05	0.000618738	3.28706	CAF2vsALL
TPI1	0.532404	8.38855	5.09121	1.05262e-05	0.00061947	3.28413	CAF2vsALL
AGC1	0.460379	4.60095	5.07455	1.10846e-05	0.000648685	3.23456	CAF2vsALL
PKNOX2	0.517417	4.84949	5.06939	1.12634e-05	0.000655491	3.21921	CAF2vsALL
KIAA1949	0.318242	7.1251	5.06342	1.1474e-05	0.000665282	3.20145	CAF2vsALL
TMEM109	0.308698	6.72831	5.05781	1.1675e-05	0.000673211	3.18479	CAF2vsALL
MARCH4	1.24653	6.09435	5.05471	1.17878e-05	0.000678205	3.17558	CAF2vsALL
SNTB1	1.19836	5.78859	5.05425	1.18048e-05	0.000678205	3.1742	CAF2vsALL
PLXND1	0.398109	4.89936	5.04955	1.19779e-05	0.000686894	3.16024	CAF2vsALL
ETS1	0.480743	6.74075	5.04416	1.21797e-05	0.000694664	3.14422	CAF2vsALL
FBN1	0.558123	5.80379	5.03612	1.2487e-05	0.000707056	3.12033	CAF2vsALL
RERG	0.547268	4.69468	5.03299	1.26089e-05	0.000711394	3.11102	CAF2vsALL
C5orf24	0.360159	5.7021	5.0323	1.26356e-05	0.000711624	3.10899	CAF2vsALL
SEPW1	0.618314	6.92193	5.0222	1.30372e-05	0.000732928	3.07899	CAF2vsALL
CDH13	1.74385	6.23351	5.01467	1.33449e-05	0.000747551	3.05663	CAF2vsALL
PFKFB4	0.721106	5.55176	5.01174	1.34666e-05	0.000751689	3.04793	CAF2vsALL
KLHDC3	0.407662	7.44506	5.00792	1.36268e-05	0.000759281	3.0366	CAF2vsALL
ZNF154	0.38717	4.91499	5.00426	1.37823e-05	0.000765237	3.02572	CAF2vsALL
LOC644879	0.51114	6.14606	4.99309	1.42672e-05	0.000785221	2.99258	CAF2vsALL
MYH11	1.64208	5.21853	4.98858	1.44675e-05	0.000794854	2.97922	CAF2vsALL
CCDC99	0.7998	5.81603	4.98571	1.45967e-05	0.000800551	2.9707	CAF2vsALL
SPEN	0.365333	6.25162	4.96398	1.56119e-05	0.000850292	2.90627	CAF2vsALL
LOC642477	0.692893	4.79149	4.96298	1.56599e-05	0.000851433	2.90332	CAF2vsALL
LOC642342	0.489241	4.71344	4.95447	1.60778e-05	0.000869557	2.87809	CAF2vsALL
NP	0.757366	5.44542	4.95394	1.61039e-05	0.000869557	2.87653	CAF2vsALL
AIF1L	0.663649	4.90742	4.95135	1.62336e-05	0.000875054	2.86885	CAF2vsALL
SERPINE1	1.25451	7.5066	4.94419	1.65965e-05	0.000890038	2.84767	CAF2vsALL
NDE1	0.339	5.87351	4.9394	1.68441e-05	0.000899276	2.83348	CAF2vsALL
MYH9	0.426887	9.01313	4.92301	1.77191e-05	0.00093902	2.78497	CAF2vsALL
FEM1B	0.42436	5.03656	4.91829	1.79797e-05	0.000949332	2.77098	CAF2vsALL
ARL4C	0.623572	5.17241	4.91099	1.83896e-05	0.000966407	2.7494	CAF2vsALL
TDG	0.430598	6.71426	4.90815	1.85516e-05	0.000971672	2.74099	CAF2vsALL
EBNA1BP2	0.404449	7.78187	4.89866	1.91033e-05	0.000993938	2.71293	CAF2vsALL
MSN	0.45633	7.60695	4.89511	1.93133e-05	0.00100321	2.70246	CAF2vsALL
DR1	0.342764	6.34578	4.89231	1.94812e-05	0.00100859	2.69417	CAF2vsALL
PKD2	0.617672	7.06247	4.8854	1.99013e-05	0.0010236	2.67374	CAF2vsALL
CCDC110	0.360951	4.8318	4.8821	2.01048e-05	0.00103069	2.664	CAF2vsALL
UPF3A	0.367541	6.2703	4.88074	2.01892e-05	0.00103333	2.65998	CAF2vsALL
PELI1	0.359649	4.95616	4.87948	2.02676e-05	0.00103566	2.65627	CAF2vsALL
ZNF532	0.312557	5.71123	4.87647	2.0457e-05	0.00104026	2.64737	CAF2vsALL
FAM158A	0.32986	5.61147	4.86869	2.09541e-05	0.00106039	2.62438	CAF2vsALL
FADD	0.304953	6.56768	4.86394	2.12627e-05	0.00107428	2.61038	CAF2vsALL
MEF2C	0.469071	4.86838	4.85987	2.15319e-05	0.00108266	2.59834	CAF2vsALL
SMARCB1	0.329363	6.13636	4.85662	2.17483e-05	0.00109179	2.58877	CAF2vsALL
C11orf87	0.321854	4.55387	4.83817	2.30206e-05	0.00114832	2.53434	CAF2vsALL
MTRF1L	0.310341	6.21969	4.83502	2.32457e-05	0.00115224	2.52503	CAF2vsALL
MYOZ1	0.590629	4.72901	4.82148	2.42356e-05	0.00118634	2.48512	CAF2vsALL
C6orf188	0.568554	5.5408	4.81974	2.43656e-05	0.00119085	2.48	CAF2vsALL
LOXL3	0.740546	5.28058	4.81709	2.45651e-05	0.00119873	2.47219	CAF2vsALL
SHROOM3	0.773472	5.34038	4.81224	2.49347e-05	0.00120926	2.4579	CAF2vsALL
ZNF362	0.418453	6.15168	4.80505	2.54924e-05	0.0012325	2.43674	CAF2vsALL
FAR1	0.321319	5.55145	4.78989	2.67101e-05	0.00127692	2.39209	CAF2vsALL
DDEF2	0.580537	6.72111	4.78428	2.71749e-05	0.00129394	2.37559	CAF2vsALL
GBE1	0.424638	7.18856	4.76906	2.84766e-05	0.00133194	2.33082	CAF2vsALL
SNAI2	0.66101	7.064	4.7675	2.86139e-05	0.00133416	2.32622	CAF2vsALL
PPP1R14B	0.508957	7.51984	4.75923	2.93501e-05	0.0013584	2.30193	CAF2vsALL
PODXL	0.700309	4.68162	4.75112	3.00909e-05	0.0013886	2.27808	CAF2vsALL
LGMN	0.832688	6.0705	4.74206	3.09399e-05	0.0014236	2.25148	CAF2vsALL
RHOJ	1.16652	5.69461	4.72691	3.24126e-05	0.00147777	2.20701	CAF2vsALL
PTPRO	0.643811	4.79134	4.71866	3.32433e-05	0.00151187	2.18282	CAF2vsALL
CYTH3	0.408172	5.65257	4.71748	3.33643e-05	0.00151518	2.17934	CAF2vsALL
STAT1	0.493746	7.77772	4.70023	3.51768e-05	0.00158901	2.12877	CAF2vsALL
SORT1	0.76549	6.08032	4.68336	3.70431e-05	0.00165123	2.07936	CAF2vsALL
IPO5	0.453192	5.78584	4.6716	3.84015e-05	0.00170453	2.04494	CAF2vsALL
HES4	1.0573	6.4625	4.66589	3.90795e-05	0.00173136	2.02822	CAF2vsALL
NTRK2	0.694746	4.70364	4.66512	3.91713e-05	0.00173136	2.02598	CAF2vsALL
CTPS	0.720615	6.68142	4.66338	3.93811e-05	0.00173819	2.02087	CAF2vsALL
VGLL3	0.724106	5.73477	4.65809	4.0024e-05	0.0017567	2.0054	CAF2vsALL
LOC400986	0.317221	5.0508	4.65537	4.03579e-05	0.00176888	1.99746	CAF2vsALL
SNX11	0.316702	5.56472	4.6431	4.19029e-05	0.00182388	1.96157	CAF2vsALL
KCTD5	0.379765	6.37557	4.63842	4.25069e-05	0.00184716	1.9479	CAF2vsALL
TUBA3D	0.567189	5.62178	4.63804	4.25554e-05	0.00184716	1.94681	CAF2vsALL
LOC649801	0.389879	5.40404	4.63268	4.32591e-05	0.00186781	1.93114	CAF2vsALL
TPX2	0.664357	5.58121	4.63233	4.33059e-05	0.00186781	1.93011	CAF2vsALL
SERPINB2	1.7173	5.4486	4.61107	4.62125e-05	0.00197624	1.86807	CAF2vsALL
PRKCDBP	0.571307	7.99941	4.60935	4.64556e-05	0.00198358	1.86306	CAF2vsALL
MAGEE1	0.418217	5.01511	4.60335	4.73152e-05	0.00201215	1.84555	CAF2vsALL
C11orf24	0.359357	5.8325	4.60268	4.74126e-05	0.00201279	1.84358	CAF2vsALL
LOC732165	0.564128	6.06987	4.59154	4.90518e-05	0.0020747	1.81113	CAF2vsALL
MYO1D	1.02003	5.39035	4.58937	4.93786e-05	0.00208571	1.80479	CAF2vsALL
GADD45B	0.682295	6.02251	4.58019	5.07814e-05	0.00213065	1.77805	CAF2vsALL
RARA	0.374016	5.28523	4.57736	5.12219e-05	0.00214341	1.7698	CAF2vsALL
CCDC50	0.457743	6.88104	4.53698	5.79283e-05	0.00238905	1.65238	CAF2vsALL
ACTN4	0.616538	7.5468	4.53145	5.89126e-05	0.00241066	1.6363	CAF2vsALL
TIMM8B	0.305894	5.73999	4.52842	5.9458e-05	0.00242981	1.62751	CAF2vsALL
MUSTN1	0.460685	4.7284	4.51656	6.16421e-05	0.00249745	1.59309	CAF2vsALL
LOC728188	0.391008	6.78384	4.51367	6.21877e-05	0.00251197	1.58469	CAF2vsALL
TRAF5	0.406289	5.27845	4.50712	6.34371e-05	0.00255259	1.56571	CAF2vsALL
PPFIA4	0.399371	4.63008	4.50597	6.36606e-05	0.00255831	1.56236	CAF2vsALL
PLXDC1	0.315792	4.67147	4.50311	6.42153e-05	0.00257402	1.55409	CAF2vsALL
OSTF1	0.359984	6.93896	4.50027	6.47726e-05	0.00258975	1.54584	CAF2vsALL
ANKRD37	1.47751	5.81398	4.49812	6.51981e-05	0.00259356	1.5396	CAF2vsALL
ARHGDIB	1.37251	6.13944	4.49133	6.65557e-05	0.00263423	1.51995	CAF2vsALL
SH3RF1	0.372226	5.6944	4.47237	7.05009e-05	0.00274682	1.46504	CAF2vsALL
CDCA4	0.349141	5.30774	4.46878	7.12725e-05	0.00276861	1.45466	CAF2vsALL
CHCHD10	0.695131	6.59067	4.45033	7.53757e-05	0.00288873	1.4013	CAF2vsALL
YIF1B	0.52422	6.45375	4.44628	7.63071e-05	0.00291731	1.3896	CAF2vsALL
AXUD1	0.498467	6.07156	4.4438	7.6884e-05	0.00293579	1.38242	CAF2vsALL
CORO1C	0.426619	7.32949	4.44052	7.76509e-05	0.00295431	1.37296	CAF2vsALL
RNF11	0.354634	5.81889	4.43587	7.8752e-05	0.00298896	1.35954	CAF2vsALL
WSB2	0.44401	7.11515	4.42794	8.06679e-05	0.00305062	1.33664	CAF2vsALL
PDXP	0.444052	6.38873	4.42512	8.13583e-05	0.00306935	1.32852	CAF2vsALL
STX2	0.306871	6.48448	4.40822	8.56278e-05	0.0032035	1.27979	CAF2vsALL
H1F0	0.503317	7.53942	4.40577	8.62659e-05	0.00321589	1.27272	CAF2vsALL
PDK3	0.32238	4.83907	4.40425	8.66636e-05	0.00322597	1.26834	CAF2vsALL
HSPBL2	0.424462	6.98224	4.40243	8.71429e-05	0.00323706	1.26308	CAF2vsALL
SCUBE3	0.789371	5.55617	4.40134	8.74309e-05	0.00324392	1.25994	CAF2vsALL
LOC729768	0.403747	8.0512	4.39938	8.79498e-05	0.00325933	1.2543	CAF2vsALL
COMMD2	0.457173	6.31783	4.39202	8.99276e-05	0.00329378	1.23312	CAF2vsALL
CYTH2	0.356896	5.21488	4.38533	9.17644e-05	0.00334935	1.21387	CAF2vsALL
TUBA1C	0.403756	8.92401	4.38465	9.19536e-05	0.00335236	1.21191	CAF2vsALL
LOC728908	0.319293	5.90295	4.37977	9.3321e-05	0.00339331	1.19785	CAF2vsALL
KCTD16	0.416542	4.6568	4.37579	9.44484e-05	0.00341951	1.18642	CAF2vsALL
RUSC2	0.320268	5.92705	4.36091	9.87885e-05	0.00354803	1.14364	CAF2vsALL
COL18A1	0.884255	6.23916	4.35867	9.94587e-05	0.0035599	1.13721	CAF2vsALL
ENO2	0.710986	5.54165	4.3531	0.000101142	0.00360781	1.12123	CAF2vsALL
GNPNAT1	0.304634	6.2177	4.34336	0.000104157	0.00370696	1.09327	CAF2vsALL
CHST7	0.598919	6.26276	4.3414	0.000104776	0.00371635	1.08763	CAF2vsALL
C11orf75	0.471962	5.99819	4.33926	0.000105453	0.00373616	1.0815	CAF2vsALL
FAM36A	0.40377	6.35097	4.33875	0.000105616	0.00373771	1.08003	CAF2vsALL
TRIP10	0.321158	5.63931	4.33725	0.000106093	0.00374615	1.07575	CAF2vsALL
HAPLN3	0.853824	5.22326	4.33615	0.000106446	0.00375439	1.07259	CAF2vsALL
UGDH	0.317051	7.62914	4.3304	0.000108307	0.00381221	1.05609	CAF2vsALL
PEA15	0.366586	8.50958	4.32828	0.000108999	0.00382726	1.05003	CAF2vsALL
PGAM1	0.384239	7.32625	4.31427	0.000113697	0.00397005	1.00988	CAF2vsALL
MORF4L1	0.338587	8.07476	4.31002	0.00011516	0.00401222	0.997719	CAF2vsALL
C6orf129	0.394813	5.85391	4.3051	0.000116878	0.00406086	0.983632	CAF2vsALL
SPRYD3	0.321445	5.9213	4.30505	0.000116895	0.00406086	0.983497	CAF2vsALL
RNGTT	0.311071	6.53469	4.30491	0.000116944	0.00406086	0.983098	CAF2vsALL
GALNTL1	0.489924	4.87475	4.28413	0.000124481	0.00428942	0.923693	CAF2vsALL
LOC643319	0.439121	5.72504	4.27798	0.000126802	0.00435506	0.90613	CAF2vsALL
LRP12	0.305523	4.75164	4.27671	0.000127288	0.00436541	0.902492	CAF2vsALL
GPR116	1.7738	5.0711	4.27293	0.000128741	0.00440497	0.891698	CAF2vsALL
TIPARP	0.637497	7.59792	4.26511	0.000131798	0.00448255	0.869394	CAF2vsALL
AFF3	1.0888	5.23131	4.25294	0.000136697	0.00461919	0.834698	CAF2vsALL
TGM1	0.305019	4.79019	4.24785	0.000138801	0.00467521	0.82018	CAF2vsALL
TPM1	0.501651	8.31187	4.23868	0.000142669	0.00477986	0.794065	CAF2vsALL
COL5A1	0.631787	8.53088	4.22761	0.000147479	0.00489923	0.762557	CAF2vsALL
APBB1IP	0.403791	5.13832	4.22441	0.000148897	0.00494111	0.753467	CAF2vsALL
OXTR	1.59619	7.03276	4.22226	0.00014986	0.00496647	0.747343	CAF2vsALL
HSPC047	0.434875	4.80171	4.21584	0.000152764	0.00501434	0.729112	CAF2vsALL
TINAGL1	0.901944	5.18996	4.2139	0.000153656	0.00503524	0.723579	CAF2vsALL
HBEGF	0.990619	5.62982	4.2106	0.000155178	0.00506186	0.714219	CAF2vsALL
GLT25D2	0.383311	4.85416	4.2104	0.000155274	0.00506186	0.713631	CAF2vsALL
PPM1H	0.417993	4.79686	4.20664	0.000157028	0.00510316	0.702963	CAF2vsALL
MEF2D	0.417688	5.90696	4.20226	0.000159098	0.00515977	0.690524	CAF2vsALL
ATP10A	0.335359	5.03471	4.20119	0.000159606	0.00517089	0.687499	CAF2vsALL
LOC644033	0.322587	6.63259	4.20001	0.000160172	0.00518389	0.684137	CAF2vsALL
CD93	0.320573	4.50837	4.19786	0.000161204	0.00521194	0.678034	CAF2vsALL
FAT1	0.850157	7.46666	4.19321	0.000163459	0.00525779	0.664845	CAF2vsALL
E2F7	0.705255	5.39798	4.18877	0.000165641	0.00530084	0.652255	CAF2vsALL
INO80C	0.485859	5.7252	4.18813	0.000165956	0.00530553	0.650449	CAF2vsALL
LOC400879	0.434013	4.77457	4.18485	0.000167589	0.0053523	0.641151	CAF2vsALL
AFAP1L1	0.30608	4.9221	4.179	0.000170546	0.00543018	0.624546	CAF2vsALL
COL4A1	1.00426	8.53245	4.17198	0.000174155	0.00551158	0.604668	CAF2vsALL
CREB3L2	0.351871	7.26684	4.16903	0.000175693	0.00554906	0.596326	CAF2vsALL
IL1RAP	0.350066	4.79877	4.15668	0.000182281	0.00571123	0.561387	CAF2vsALL
C13orf33	0.812714	5.09587	4.15277	0.000184419	0.00575527	0.550322	CAF2vsALL
LINGO1	0.371594	4.59069	4.13354	0.000195285	0.00601671	0.496004	CAF2vsALL
RTN1	0.638736	4.91409	4.12019	0.000203201	0.00618779	0.458317	CAF2vsALL
DLGAP4	0.401057	5.67591	4.11884	0.000204016	0.0062006	0.45452	CAF2vsALL
TRAK1	0.430463	6.0573	4.11128	0.00020865	0.00631091	0.433223	CAF2vsALL
MIS12	0.314232	6.52033	4.11041	0.000209191	0.00632119	0.430768	CAF2vsALL
ANXA6	0.395768	6.09576	4.1087	0.000210259	0.00634737	0.425938	CAF2vsALL
LOC375295	0.978037	5.27398	4.10687	0.000211401	0.00636349	0.420803	CAF2vsALL
MAP3K1	0.574184	5.79813	4.10132	0.000214918	0.00645084	0.405158	CAF2vsALL
DYNLT3	0.66099	7.14161	4.10037	0.000215523	0.00646282	0.402493	CAF2vsALL
TMEM16C	0.419212	4.65272	4.09579	0.000218472	0.00652775	0.38961	CAF2vsALL
TMEM166	0.919997	6.5221	4.09268	0.000220497	0.00657432	0.380866	CAF2vsALL
HIST1H4C	0.577695	8.35694	4.09047	0.000221947	0.0066113	0.37465	CAF2vsALL
DNAJC9	0.479251	6.73748	4.07535	0.000232126	0.00684314	0.332153	CAF2vsALL
PCDH10	0.845075	5.30817	4.0724	0.000234164	0.00688385	0.32387	CAF2vsALL
FLJ39632	0.321717	4.62548	4.06665	0.00023819	0.00698459	0.307718	CAF2vsALL
FZD2	0.555188	6.59744	4.06468	0.000239581	0.00701683	0.302202	CAF2vsALL
PRR16	0.634158	5.84116	4.06301	0.000240768	0.00703196	0.297517	CAF2vsALL
KIF4A	0.401388	4.88916	4.05999	0.000242929	0.00708847	0.289053	CAF2vsALL
KRT86	0.446995	4.59479	4.03715	0.00025991	0.00746613	0.225055	CAF2vsALL
ARHGDIA	0.316434	7.52552	4.03408	0.000262282	0.00752738	0.216453	CAF2vsALL
ITGA3	1.10108	6.30303	4.02714	0.000267711	0.0076622	0.197054	CAF2vsALL
AK5	0.325297	4.86471	4.02107	0.000272556	0.00777255	0.180074	CAF2vsALL
LOC731007	0.454446	4.83536	4.01819	0.000274883	0.00782471	0.172026	CAF2vsALL
LOC440043	0.312478	8.85105	4.00437	0.00028632	0.00805589	0.133444	CAF2vsALL
LOC731049	0.438516	6.92633	4.00412	0.000286532	0.00805589	0.132743	CAF2vsALL
RNF141	0.399084	5.45437	4.0034	0.00028714	0.00805753	0.130738	CAF2vsALL
UACA	0.505332	5.30237	4.00227	0.000288095	0.00806923	0.127595	CAF2vsALL
TRAM1L1	0.351361	4.73577	3.99798	0.000291766	0.00814301	0.115614	CAF2vsALL
NUDT1	0.324777	5.47721	3.98652	0.000301779	0.00838523	0.0836888	CAF2vsALL
HNRPH3	0.355884	6.21207	3.98374	0.000304264	0.00843937	0.0759294	CAF2vsALL
UNC84B	0.353483	7.75614	3.95913	0.000327093	0.00896965	0.00750563	CAF2vsALL
IFFO2	0.391892	5.20196	3.95025	0.000335739	0.00915087	-0.0171627	CAF2vsALL
MOBKL2B	0.333698	4.55429	3.94804	0.000337926	0.00918891	-0.0233	CAF2vsALL
PLEKHG2	0.323875	5.21064	3.94795	0.000338012	0.00918891	-0.0235412	CAF2vsALL
LOC399942	0.62665	6.88422	3.9445	0.000341451	0.00925849	-0.0331086	CAF2vsALL
KIAA1671	0.651322	4.89977	3.9434	0.000342563	0.00927252	-0.036183	CAF2vsALL
MCM2	0.352966	5.07875	3.93943	0.00034657	0.00933759	-0.0471733	CAF2vsALL
COL8A1	1.05204	7.40692	3.93663	0.000349426	0.00938934	-0.0549302	CAF2vsALL
TICAM2	0.326513	6.18207	3.93575	0.000350335	0.00939387	-0.0573852	CAF2vsALL
C9orf3	0.390895	5.58201	3.93263	0.000353556	0.00944801	-0.0660358	CAF2vsALL
C1orf59	0.459488	5.65507	3.92452	0.000362056	0.00962603	-0.0884843	CAF2vsALL
ICK	0.334326	5.24908	3.91291	0.000374578	0.00988369	-0.120606	CAF2vsALL
TMEM45A	0.478124	6.8443	3.91073	0.000376976	0.00992199	-0.126636	CAF2vsALL
EDIL3	1.20419	5.72896	3.90962	0.000378205	0.00994601	-0.129711	CAF2vsALL
PFKP	0.470613	8.03739	3.90348	0.000385063	0.010059	-0.146682	CAF2vsALL
ABHD4	0.413354	5.45849	3.89457	0.000395218	0.0102223	-0.171265	CAF2vsALL
KHDRBS3	0.736728	6.38613	3.89408	0.000395784	0.0102285	-0.172616	CAF2vsALL
AFAP1	0.503346	5.61417	3.89125	0.000399074	0.0102684	-0.180433	CAF2vsALL
FAM156B	0.315026	6.41079	3.89093	0.000399453	0.0102684	-0.18133	CAF2vsALL
TMEM189	0.329288	6.15536	3.88574	0.000405552	0.0103926	-0.195636	CAF2vsALL
ASAP2	0.474498	6.26933	3.88277	0.000409088	0.0104605	-0.203832	CAF2vsALL
C13orf37	0.358804	6.2236	3.86994	0.000424687	0.0107285	-0.239155	CAF2vsALL
CITED2	0.623435	7.89776	3.8629	0.000433498	0.0109386	-0.258535	CAF2vsALL
SH3KBP1	0.484039	6.7846	3.86264	0.000433824	0.0109386	-0.259243	CAF2vsALL
TRPC6	0.773675	4.94818	3.86231	0.000434244	0.0109386	-0.260157	CAF2vsALL
AVEN	0.372937	6.86277	3.86194	0.000434714	0.0109386	-0.261177	CAF2vsALL
TROAP	0.531535	5.10716	3.86146	0.000435326	0.0109386	-0.262505	CAF2vsALL
RERGL	0.760596	4.6903	3.85414	0.000444712	0.0111166	-0.282631	CAF2vsALL
LOC644877	0.307388	6.03428	3.85245	0.000446905	0.0111552	-0.287273	CAF2vsALL
C1orf198	0.803255	7.36051	3.8463	0.000454976	0.0112761	-0.304159	CAF2vsALL
ABCB9	0.348655	5.46214	3.84071	0.000462436	0.0114339	-0.319499	CAF2vsALL
SLC16A3	0.640687	7.68172	3.83684	0.000467672	0.0115362	-0.330118	CAF2vsALL
NUAK1	0.719243	6.91721	3.83566	0.000469289	0.0115532	-0.333372	CAF2vsALL
PGK1	0.358369	7.57307	3.82752	0.000480524	0.0117609	-0.355681	CAF2vsALL
SHISA2	0.51749	4.66446	3.82572	0.000483047	0.0117951	-0.36062	CAF2vsALL
INPP4B	0.684246	5.32136	3.82417	0.000485222	0.011831	-0.364854	CAF2vsALL
ICMT	0.348706	5.97633	3.80962	0.000506158	0.0122452	-0.404677	CAF2vsALL
SHRM	0.800844	5.92173	3.80901	0.000507055	0.012248	-0.406344	CAF2vsALL
PRKAG2	0.461313	5.68695	3.80395	0.000514554	0.0124006	-0.420182	CAF2vsALL
LOC730534	0.382481	8.47848	3.80209	0.000517341	0.0124487	-0.425272	CAF2vsALL
CSRP2	0.780692	8.00028	3.79791	0.000523647	0.0125811	-0.436689	CAF2vsALL
FLJ35409	0.594335	5.06368	3.78969	0.000536267	0.0128255	-0.459126	CAF2vsALL
PDE1C	0.431075	4.77715	3.7892	0.000537022	0.0128338	-0.460452	CAF2vsALL
CAV2	0.663391	7.30111	3.78739	0.000539842	0.0128816	-0.465386	CAF2vsALL
TMEM173	0.607492	6.72141	3.78667	0.000540981	0.0128892	-0.467372	CAF2vsALL
FAM64A	0.650161	5.42135	3.78018	0.000551233	0.0130839	-0.485055	CAF2vsALL
PDGFRB	0.416446	8.47434	3.77812	0.00055454	0.0131524	-0.490688	CAF2vsALL
C17orf96	0.331642	4.88223	3.77764	0.000555303	0.0131606	-0.491984	CAF2vsALL
TAGLN2	0.4549	6.87035	3.77633	0.00055741	0.0132006	-0.495551	CAF2vsALL
RRAS2	0.3069	6.83802	3.7745	0.000560362	0.0132423	-0.500525	CAF2vsALL
STARD10	0.50967	5.58335	3.77253	0.000563579	0.0133066	-0.505915	CAF2vsALL
ANO3	0.38439	4.68634	3.75935	0.000585462	0.0136794	-0.541784	CAF2vsALL
EGF	0.315502	4.71614	3.75156	0.000598775	0.0138974	-0.562949	CAF2vsALL
SPP1	0.333416	4.65354	3.75088	0.000599951	0.0139144	-0.564796	CAF2vsALL
SLC44A2	0.361934	7.39583	3.74913	0.000602996	0.0139747	-0.569561	CAF2vsALL
LOC729708	0.632183	6.93282	3.74461	0.00061091	0.0141088	-0.581833	CAF2vsALL
SLC7A1	0.410233	6.88228	3.72903	0.000638969	0.0146251	-0.624086	CAF2vsALL
ADA	0.413669	5.32714	3.72257	0.000650967	0.0148456	-0.641586	CAF2vsALL
ITGA10	0.457348	4.78166	3.72037	0.000655104	0.0149183	-0.647543	CAF2vsALL
FER1L3	0.398507	7.62164	3.71902	0.000657652	0.0149655	-0.651194	CAF2vsALL
STK32B	0.875684	5.11153	3.71868	0.000658292	0.0149692	-0.652109	CAF2vsALL
LOC401152	0.419046	6.63699	3.70241	0.000689812	0.0155112	-0.696088	CAF2vsALL
C14orf37	0.469094	4.97007	3.69668	0.00070127	0.0156926	-0.711575	CAF2vsALL
RGS5	1.50646	5.4919	3.69652	0.000701589	0.0156926	-0.712002	CAF2vsALL
ANKRD34A	0.339369	5.21453	3.69626	0.000702114	0.0156932	-0.712706	CAF2vsALL
AGTPBP1	0.399453	5.10603	3.69386	0.000706976	0.0157794	-0.719192	CAF2vsALL
SYNPO2	0.58188	5.17944	3.68709	0.000720844	0.0160094	-0.73745	CAF2vsALL
DDAH1	0.593083	7.88376	3.68437	0.000726486	0.0160626	-0.744776	CAF2vsALL
CASP2	0.365847	6.36218	3.68421	0.000726818	0.0160626	-0.745206	CAF2vsALL
MSRB3	0.458895	6.78185	3.68358	0.000728129	0.0160645	-0.7469	CAF2vsALL
SEL1L2	0.518698	4.69501	3.68026	0.000735102	0.0161548	-0.755855	CAF2vsALL
UCK2	0.430056	5.82532	3.66933	0.00075849	0.0165645	-0.785279	CAF2vsALL
KIAA1539	0.503234	6.00303	3.66507	0.000767804	0.0167446	-0.796744	CAF2vsALL
MYOF	0.378071	8.07826	3.66389	0.000770397	0.0167688	-0.79991	CAF2vsALL
GTSE1	0.367021	5.08544	3.66383	0.000770514	0.0167688	-0.800053	CAF2vsALL
CALD1	0.450881	8.6458	3.6621	0.000774359	0.0168175	-0.804727	CAF2vsALL
P4HA1	0.521912	6.99631	3.65366	0.000793274	0.0170886	-0.827391	CAF2vsALL
MLF1IP	0.341119	4.85129	3.65236	0.000796238	0.0171238	-0.830892	CAF2vsALL
FEN1	0.506043	5.90343	3.65113	0.00079904	0.0171528	-0.83419	CAF2vsALL
CCDC3	1.13735	5.04657	3.64976	0.000802161	0.0171956	-0.83785	CAF2vsALL
AGTR1	0.501117	5.11188	3.64607	0.000810661	0.0173423	-0.847746	CAF2vsALL
PTPLA	0.497806	7.68793	3.64002	0.000824807	0.0175764	-0.863985	CAF2vsALL
LOC148915	0.391962	7.94121	3.63995	0.000824962	0.0175764	-0.864162	CAF2vsALL
PLEKHG3	0.403842	5.22189	3.63425	0.000838511	0.0177224	-0.879451	CAF2vsALL
QPCT	0.51469	5.52937	3.6244	0.00086239	0.0180316	-0.9058	CAF2vsALL
LIMS2	0.627428	6.10617	3.6239	0.000863633	0.0180445	-0.907152	CAF2vsALL
FCHSD2	0.360359	5.77553	3.62327	0.00086518	0.0180539	-0.908831	CAF2vsALL
RASGRP1	0.581321	4.88557	3.61447	0.000887148	0.0184145	-0.932354	CAF2vsALL
NRAS	0.300299	5.84958	3.61062	0.000896936	0.0185564	-0.942645	CAF2vsALL
MCM5	0.417274	5.44587	3.59807	0.000929543	0.0191131	-0.97613	CAF2vsALL
PSCDBP	0.347646	4.7059	3.59792	0.000929926	0.0191131	-0.976517	CAF2vsALL
ITGB5	0.493638	7.48862	3.59271	0.00094381	0.0193226	-0.99041	CAF2vsALL
GINS2	0.627848	5.50915	3.57978	0.000979116	0.0198514	-1.02483	CAF2vsALL
ANGPTL4	0.518931	5.42001	3.57661	0.000987969	0.0200051	-1.03327	CAF2vsALL
ZNF671	0.305815	5.22271	3.56649	0.00101672	0.0204685	-1.06014	CAF2vsALL
PCDH17	0.327215	4.56425	3.56346	0.00102549	0.0205924	-1.06819	CAF2vsALL
GPSM2	0.384526	5.40167	3.56171	0.00103059	0.0206552	-1.07283	CAF2vsALL
SNX25	0.537146	5.57401	3.56011	0.00103526	0.0207355	-1.07707	CAF2vsALL
TIMM10	0.305239	6.49418	3.55963	0.00103667	0.0207506	-1.07835	CAF2vsALL
ECM2	0.731725	5.34872	3.55207	0.0010591	0.0211054	-1.09839	CAF2vsALL
SLC20A2	0.541678	6.6249	3.54605	0.00107728	0.0213604	-1.11433	CAF2vsALL
COL5A2	0.361478	8.83362	3.54491	0.00108079	0.0214019	-1.11737	CAF2vsALL
NKIRAS2	0.311125	5.4119	3.54069	0.00109375	0.0215906	-1.12853	CAF2vsALL
SPIRE1	0.346281	6.97056	3.53411	0.00111427	0.0218583	-1.14593	CAF2vsALL
MGLL	0.484584	5.71526	3.52455	0.00114476	0.0223171	-1.17119	CAF2vsALL
TSPAN2	0.356365	4.78113	3.51974	0.00116038	0.0225377	-1.18387	CAF2vsALL
VEGFC	0.638254	7.08278	3.51761	0.00116737	0.0226176	-1.18948	CAF2vsALL
SLIT3	1.29447	5.3809	3.50307	0.00121618	0.0234046	-1.2278	CAF2vsALL
MGC18216	0.382013	5.81403	3.50002	0.00122668	0.023549	-1.23584	CAF2vsALL
PDZRN4	0.356528	4.60909	3.49236	0.00125339	0.0239011	-1.25597	CAF2vsALL
OSTCL	0.315458	5.77672	3.48706	0.0012722	0.0241863	-1.26989	CAF2vsALL
RIT1	0.361342	6.05308	3.48514	0.00127908	0.0242878	-1.27493	CAF2vsALL
LASS6	0.574196	6.22017	3.48046	0.00129602	0.0245501	-1.28723	CAF2vsALL
SEMA6A	0.351408	4.7279	3.46815	0.00134156	0.0252152	-1.3195	CAF2vsALL
LOC732007	0.334589	7.17828	3.46586	0.0013502	0.025302	-1.32549	CAF2vsALL
KIAA1324L	0.630566	4.76493	3.46306	0.00136081	0.0254552	-1.3328	CAF2vsALL
SLC2A1	0.987154	6.77141	3.4623	0.00136373	0.025466	-1.33481	CAF2vsALL
PTGFRN	0.719222	4.87864	3.45917	0.00137575	0.0256431	-1.343	CAF2vsALL
CRIM1	0.448353	6.85503	3.45255	0.00140147	0.0260557	-1.36029	CAF2vsALL
SGOL2	0.304696	4.99267	3.4457	0.0014286	0.0264089	-1.37819	CAF2vsALL
LOC650832	0.423486	6.36075	3.44461	0.00143295	0.0264737	-1.38103	CAF2vsALL
RHOB	0.485508	7.2307	3.44251	0.00144138	0.0265983	-1.38651	CAF2vsALL
DAGLB	0.321255	6.22739	3.43996	0.00145171	0.0267437	-1.39317	CAF2vsALL
SMYD2	0.420186	5.73	3.43768	0.00146096	0.0268179	-1.3991	CAF2vsALL
LOC100130506	0.309506	6.18014	3.43272	0.00148137	0.0270818	-1.41205	CAF2vsALL
NES	0.928238	6.00889	3.42797	0.00150113	0.0273369	-1.42441	CAF2vsALL
NUF2	0.370534	4.89299	3.42685	0.00150585	0.0273768	-1.42734	CAF2vsALL
FYN	0.363787	5.14339	3.42655	0.00150709	0.0273768	-1.42811	CAF2vsALL
TLN1	0.316112	7.08964	3.42329	0.00152087	0.0275045	-1.4366	CAF2vsALL
MGC40489	0.312316	5.61247	3.41954	0.00153688	0.027662	-1.44636	CAF2vsALL
SLC2A6	0.555551	5.61449	3.41805	0.00154325	0.0277608	-1.45022	CAF2vsALL
TNS1	0.637151	6.01147	3.41352	0.00156285	0.0280057	-1.46199	CAF2vsALL
MED4	0.344639	6.12553	3.41306	0.00156488	0.0280057	-1.4632	CAF2vsALL
GPC4	0.589486	4.77775	3.40444	0.00160288	0.0286043	-1.48557	CAF2vsALL
STS-1	0.725285	6.36694	3.3957	0.00164235	0.0291597	-1.50825	CAF2vsALL
FNIP2	0.311575	5.46705	3.39472	0.00164679	0.029189	-1.51076	CAF2vsALL
LOC729264	0.398385	4.71303	3.38497	0.00169205	0.0298063	-1.53603	CAF2vsALL
GPR1	0.508353	6.49309	3.38252	0.00170358	0.0299477	-1.54235	CAF2vsALL
ARHGEF6	0.42336	6.0408	3.38105	0.00171057	0.0300315	-1.54617	CAF2vsALL
ATP1B1	0.653824	6.80677	3.3805	0.00171315	0.0300432	-1.54757	CAF2vsALL
C3orf70	0.796838	5.35258	3.37293	0.00174953	0.0304603	-1.56714	CAF2vsALL
PPME1	0.545545	6.56557	3.37231	0.00175251	0.0304901	-1.56873	CAF2vsALL
C1orf133	0.875206	6.01998	3.37044	0.00176164	0.0305357	-1.57356	CAF2vsALL
RFC4	0.308424	6.19804	3.36429	0.00179191	0.0309385	-1.58943	CAF2vsALL
TLE4	0.430603	5.86325	3.35911	0.00181781	0.0312166	-1.60279	CAF2vsALL
EPHA2	0.367313	5.12614	3.35544	0.00183633	0.0314909	-1.61222	CAF2vsALL
KIF2C	0.41831	5.00553	3.34842	0.00187234	0.0318744	-1.6303	CAF2vsALL
SPINT2	0.679718	4.86764	3.34022	0.00191527	0.032412	-1.65139	CAF2vsALL
LOC651816	0.381749	6.23521	3.33796	0.00192728	0.0325803	-1.6572	CAF2vsALL
CCND2	1.25227	6.42973	3.33745	0.00192999	0.0325911	-1.65851	CAF2vsALL
PLAGL1	0.347746	5.31403	3.33523	0.00194183	0.0327557	-1.6642	CAF2vsALL
LOC646821	0.302168	5.67279	3.3319	0.00195978	0.0329274	-1.67276	CAF2vsALL
TUBB2C	0.417576	7.35617	3.33178	0.00196039	0.0329274	-1.67304	CAF2vsALL
UHRF1	0.548924	5.71301	3.31241	0.0020679	0.0343441	-1.72268	CAF2vsALL
HK2	0.429297	5.91795	3.30817	0.00209214	0.0346833	-1.73351	CAF2vsALL
PGAM4	0.335672	7.01635	3.30453	0.00211322	0.0349004	-1.74283	CAF2vsALL
HTRA1	0.628521	8.16021	3.30385	0.00211713	0.034914	-1.74454	CAF2vsALL
KCNG1	0.338551	4.96589	3.29943	0.00214303	0.0352335	-1.75584	CAF2vsALL
SCG2	0.440866	4.95957	3.29441	0.00217278	0.0355449	-1.76864	CAF2vsALL
ITGBL1	0.532589	6.29907	3.2857	0.00222532	0.0361971	-1.79083	CAF2vsALL
DDX39	0.376747	6.55378	3.27968	0.00226236	0.0366291	-1.80616	CAF2vsALL
ASF1B	0.305895	4.91716	3.27379	0.00229921	0.0370538	-1.82116	CAF2vsALL
CHSY1	0.407875	7.47907	3.27026	0.00232152	0.0372986	-1.83012	CAF2vsALL
ENDOD1	0.490528	5.86841	3.26149	0.0023779	0.0379522	-1.85238	CAF2vsALL
HMGB1L1	0.3091	6.49972	3.26062	0.00238354	0.0379966	-1.85458	CAF2vsALL
CD36	0.610214	4.761	3.25979	0.00238895	0.0380179	-1.85668	CAF2vsALL
NUSAP1	0.622454	5.67744	3.25756	0.00240358	0.0381319	-1.86235	CAF2vsALL
LOC201725	0.34085	5.48047	3.25303	0.00243348	0.0385068	-1.87381	CAF2vsALL
ITGA8	0.619698	4.99269	3.25279	0.00243508	0.0385098	-1.87442	CAF2vsALL
FSTL3	0.637916	6.36009	3.24457	0.00249037	0.0391312	-1.89524	CAF2vsALL
LOC646347	0.371731	7.24811	3.24095	0.00251509	0.0393173	-1.9044	CAF2vsALL
CKS1B	0.434323	6.64492	3.23602	0.00254912	0.0397463	-1.91686	CAF2vsALL
NPAS1	0.5979	5.40992	3.23318	0.00256891	0.0399656	-1.92402	CAF2vsALL
AMPH	0.382317	4.75403	3.21753	0.00268063	0.0412757	-1.96346	CAF2vsALL
LOC100134073	0.738367	5.54671	3.21752	0.0026807	0.0412757	-1.96349	CAF2vsALL
KIF11	0.466239	5.39406	3.21591	0.00269248	0.0414029	-1.96755	CAF2vsALL
HSPB8	0.435165	6.40592	3.21328	0.00271178	0.0415709	-1.97416	CAF2vsALL
LOC440157	0.302036	5.08722	3.20648	0.00276232	0.0421164	-1.99126	CAF2vsALL
ACYP2	0.309349	5.71014	3.20615	0.0027648	0.0421166	-1.99209	CAF2vsALL
PLCXD1	0.319594	5.42247	3.19373	0.00285952	0.0432265	-2.02327	CAF2vsALL
PGM2	0.395608	5.76307	3.19308	0.00286458	0.0432471	-2.02491	CAF2vsALL
ACTR3	0.31809	7.85546	3.19284	0.00286644	0.0432471	-2.02551	CAF2vsALL
HOXD1	0.418158	4.52016	3.18439	0.00293274	0.0439296	-2.04666	CAF2vsALL
STMN1	0.383546	5.20497	3.17058	0.00304438	0.0451073	-2.08121	CAF2vsALL
LOC653355	0.331351	4.73678	3.16868	0.00305997	0.0452804	-2.08593	CAF2vsALL
LOC653377	0.309503	7.37396	3.16703	0.00307371	0.0453544	-2.09007	CAF2vsALL
MGC39900	0.352939	5.73489	3.16644	0.00307857	0.0453786	-2.09154	CAF2vsALL
LOC100134728	0.344727	4.87179	3.16553	0.00308611	0.0454215	-2.0938	CAF2vsALL
MCM3	0.360515	6.43176	3.15669	0.0031606	0.046284	-2.11584	CAF2vsALL
LOC647000	0.302015	8.64294	3.15432	0.00318091	0.0465378	-2.12176	CAF2vsALL
FNBP1L	0.529668	4.97575	3.1525	0.0031965	0.0467007	-2.12627	CAF2vsALL
LCE2A	0.57791	4.65491	3.15224	0.00319873	0.0467116	-2.12692	CAF2vsALL
SERTAD1	0.310085	6.57885	3.15092	0.00321017	0.0468568	-2.13021	CAF2vsALL
NT5DC2	0.383846	6.27723	3.14955	0.00322199	0.0469421	-2.13361	CAF2vsALL
CENTG2	0.421964	6.0495	3.14444	0.00326665	0.0473398	-2.14633	CAF2vsALL
MN1	0.676894	5.2636	3.13956	0.0033098	0.0478005	-2.15845	CAF2vsALL
LIMS1	0.393612	6.67088	3.12692	0.00342416	0.048846	-2.1898	CAF2vsALL
COL4A5	0.828367	6.30627	3.12571	0.0034353	0.0489826	-2.1928	CAF2vsALL
LMO4	0.463968	7.88352	7.28035	1.17275e-08	4.60687e-05	9.58367	CAF1vsALL
LAMA4	1.12704	7.01381	7.15271	1.73275e-08	5.23024e-05	9.22959	CAF1vsALL
RGS2	1.09631	7.77221	7.14957	1.74949e-08	5.23024e-05	9.22087	CAF1vsALL
ALDH1A1	2.13313	8.22353	6.57878	1.01775e-07	0.000199899	7.61757	CAF1vsALL
PHF15	0.390372	5.69104	6.45904	1.47634e-07	0.000257753	7.27775	CAF1vsALL
S1PR3	0.897672	6.93771	6.38691	1.84775e-07	0.000305619	7.07258	CAF1vsALL
DHRS3	1.41445	7.9434	6.30304	2.39937e-07	0.000359059	6.83358	CAF1vsALL
PAMR1	0.922179	7.40805	6.17361	3.59247e-07	0.000481543	6.46401	CAF1vsALL
PRNP	0.43062	8.69587	6.16611	3.67754e-07	0.000481543	6.44257	CAF1vsALL
TPST1	0.628372	7.18947	6.14445	3.93464e-07	0.000484216	6.38066	CAF1vsALL
STK38	0.527798	6.23988	5.96154	6.96665e-07	0.000706239	5.85689	CAF1vsALL
DRAM1	0.684691	7.60172	5.93543	7.55899e-07	0.000719844	5.78203	CAF1vsALL
SYNGR1	0.391448	5.06843	5.84086	1.01589e-06	0.000857541	5.51076	CAF1vsALL
SLC35C1	0.420761	6.39597	5.79595	1.16901e-06	0.000918436	5.38188	CAF1vsALL
OBFC2A	0.798916	7.86238	5.76887	1.27228e-06	0.000940016	5.30416	CAF1vsALL
RDH10	1.08807	7.54314	5.68519	1.65265e-06	0.00114215	5.06394	CAF1vsALL
FAM89A	0.81292	5.94323	5.66203	1.77673e-06	0.00114215	4.99744	CAF1vsALL
TMEM140	0.715551	5.94188	5.66287	1.77207e-06	0.00114215	4.99986	CAF1vsALL
GPR137B	0.587398	6.31635	5.66466	1.76218e-06	0.00114215	5.005	CAF1vsALL
PODN	1.18205	6.92456	5.62634	1.98637e-06	0.00124847	4.89498	CAF1vsALL
TGM2	0.836919	7.3218	5.58541	2.25738e-06	0.00128983	4.77746	CAF1vsALL
CFH	0.86162	6.21595	5.49813	2.96477e-06	0.00160639	4.52695	CAF1vsALL
FBLN5	0.755808	7.33313	5.4662	3.2755e-06	0.0017156	4.43534	CAF1vsALL
SOX4	0.632104	6.8681	5.45133	3.43109e-06	0.00176763	4.39268	CAF1vsALL
PRRG1	0.566965	6.41952	5.42292	3.74919e-06	0.00190005	4.31117	CAF1vsALL
KIAA0247	0.427033	6.16341	5.40215	4.00015e-06	0.00193398	4.25161	CAF1vsALL
FBXL11	0.301449	5.95069	5.39011	4.1531e-06	0.0019775	4.21711	CAF1vsALL
SCARB1	0.527636	5.8174	5.3762	4.33721e-06	0.00203434	4.17723	CAF1vsALL
BOC	0.452247	5.00983	5.31576	5.23631e-06	0.0022542	4.00403	CAF1vsALL
HEG1	0.752143	7.3764	5.30312	5.44669e-06	0.00231308	3.96781	CAF1vsALL
PRICKLE2	0.405382	6.34229	5.26051	6.2196e-06	0.00257181	3.84579	CAF1vsALL
AK3	0.394041	7.51003	5.22232	7.00432e-06	0.0027175	3.73653	CAF1vsALL
SVEP1	1.1594	7.35038	5.21219	7.2287e-06	0.00277036	3.70753	CAF1vsALL
LXN	0.80647	8.93644	5.20404	7.41424e-06	0.00277381	3.68423	CAF1vsALL
ASS1	0.832262	6.4483	5.18895	7.77029e-06	0.00283941	3.6411	CAF1vsALL
TYRO3	0.35878	5.11162	5.14952	8.78322e-06	0.00310136	3.52841	CAF1vsALL
ANGPTL2	0.865063	7.20364	5.14413	8.93167e-06	0.00311057	3.513	CAF1vsALL
ARHGEF3	0.821741	5.98503	5.1396	9.05828e-06	0.00311057	3.50006	CAF1vsALL
PLEKHH2	0.485175	5.35442	5.1379	9.10623e-06	0.00311057	3.4952	CAF1vsALL
CAMK2N1	0.495717	8.58674	5.10041	1.023e-05	0.00342009	3.3882	CAF1vsALL
PERP	0.478967	7.76265	5.06136	1.15475e-05	0.00370298	3.2768	CAF1vsALL
LAMA2	0.68702	5.77706	5.04633	1.20982e-05	0.00380198	3.23396	CAF1vsALL
CYB5A	0.525591	7.26202	4.98794	1.44964e-05	0.00429776	3.06767	CAF1vsALL
PTGDS	1.46091	6.43716	4.96803	1.54171e-05	0.0044861	3.01105	CAF1vsALL
ICAM1	0.45528	4.99031	4.92509	1.76059e-05	0.00496646	2.88899	CAF1vsALL
C1S	0.84519	7.58363	4.8831	2.0043e-05	0.00516288	2.7698	CAF1vsALL
USP53	0.748555	5.36054	4.89117	1.95498e-05	0.00516288	2.79271	CAF1vsALL
LOC653110	0.442563	5.07692	4.89071	1.95774e-05	0.00516288	2.79141	CAF1vsALL
B4GALT4	0.412844	6.34949	4.89597	1.92623e-05	0.00516288	2.80632	CAF1vsALL
OSGIN2	0.34216	5.68326	4.88654	1.98311e-05	0.00516288	2.77957	CAF1vsALL
FAM20C	0.47263	5.70504	4.87124	2.07895e-05	0.00531164	2.73618	CAF1vsALL
LRRC8D	0.430613	5.66181	4.85854	2.16201e-05	0.00547931	2.70017	CAF1vsALL
DPP4	1.07844	6.3128	4.84235	2.27263e-05	0.00558781	2.65431	CAF1vsALL
RAB7L1	0.339738	5.76958	4.82048	2.43098e-05	0.00583176	2.59239	CAF1vsALL
SLC31A1	0.407495	6.34285	4.81329	2.4854e-05	0.00590076	2.57204	CAF1vsALL
WNT2	1.17141	5.78382	4.75921	2.93523e-05	0.00668423	2.41916	CAF1vsALL
LRCH2	0.392525	6.1107	4.74311	3.08396e-05	0.0069724	2.37374	CAF1vsALL
MASP1	0.568352	5.8668	4.69933	3.52737e-05	0.00775183	2.25031	CAF1vsALL
APP	0.396581	6.39857	4.67958	3.74753e-05	0.00801155	2.19469	CAF1vsALL
MKX	0.904271	7.41331	4.66361	3.9353e-05	0.00806086	2.14977	CAF1vsALL
ARMC4	0.37085	5.10362	4.66718	3.89259e-05	0.00806086	2.1598	CAF1vsALL
HSPA2	0.696853	5.60388	4.65536	4.03597e-05	0.00807903	2.12657	CAF1vsALL
GABARAPL1	0.695928	6.93306	4.65321	4.06257e-05	0.00807903	2.12054	CAF1vsALL
PICALM	0.439706	6.44865	4.64399	4.17888e-05	0.0082039	2.09461	CAF1vsALL
C1R	0.757633	6.55552	4.61158	4.61401e-05	0.0085294	2.00364	CAF1vsALL
CASK	0.303882	5.45074	4.57807	5.11106e-05	0.00896805	1.90969	CAF1vsALL
LOC440498	0.331618	5.67775	4.56093	5.38528e-05	0.00924797	1.86171	CAF1vsALL
SYPL2	0.838387	5.35958	4.53483	5.8309e-05	0.00972148	1.78873	CAF1vsALL
PRICKLE1	0.598528	6.66423	4.53727	5.78776e-05	0.00972148	1.79554	CAF1vsALL
MOSPD1	0.416327	5.9547	4.53049	5.90849e-05	0.00972148	1.77659	CAF1vsALL
FGF2	0.453588	6.42422	4.52056	6.08973e-05	0.00977554	1.74886	CAF1vsALL
PIK3IP1	0.377709	6.72589	4.51934	6.11234e-05	0.00977554	1.74546	CAF1vsALL
ABCA1	0.501783	7.11567	4.51228	6.245e-05	0.00986208	1.72575	CAF1vsALL
PRR5	0.352827	4.92924	4.51326	6.22652e-05	0.00986208	1.72847	CAF1vsALL
FBLN1	1.20271	7.69981	4.48012	6.88608e-05	0.0106332	1.63607	CAF1vsALL
KIAA0182	0.357624	5.80616	4.47773	6.93629e-05	0.0106332	1.62941	CAF1vsALL
C8orf13	0.70697	5.00706	4.46387	7.23443e-05	0.0109831	1.59079	CAF1vsALL
UBE2L6	0.438709	6.84468	4.45795	7.36533e-05	0.011128	1.57434	CAF1vsALL
IGFBP3	1.30749	7.79447	4.45025	7.53944e-05	0.0113357	1.55291	CAF1vsALL
NXN	0.419523	6.85643	4.448	7.59103e-05	0.0113357	1.54665	CAF1vsALL
CNTN3	0.588292	5.33696	4.42587	8.11752e-05	0.0119206	1.48514	CAF1vsALL
RHOBTB3	0.701427	8.23167	4.41577	8.36958e-05	0.0121563	1.45709	CAF1vsALL
ASAM	0.800488	6.66157	4.40484	8.6508e-05	0.0122226	1.42678	CAF1vsALL
CSMD2	0.538548	5.29804	4.40833	8.56004e-05	0.0122226	1.43645	CAF1vsALL
CPXM1	0.330683	5.23005	4.40399	8.67321e-05	0.0122226	1.42441	CAF1vsALL
TMEM176A	1.2762	5.33761	4.37695	9.41185e-05	0.0127022	1.34946	CAF1vsALL
TMEM176B	0.675794	4.84207	4.37609	9.43641e-05	0.0127022	1.34707	CAF1vsALL
GCLM	0.519503	6.99406	4.37195	9.55498e-05	0.0127777	1.33563	CAF1vsALL
RARRES2	1.40484	7.14673	4.36427	9.77924e-05	0.0129414	1.31436	CAF1vsALL
LIMCH1	0.899384	6.44088	4.36353	9.80099e-05	0.0129414	1.31232	CAF1vsALL
BMP4	0.801207	6.58096	4.35896	9.93712e-05	0.0129704	1.29967	CAF1vsALL
GTF2IP1	0.373771	6.61865	4.35718	9.99059e-05	0.0129704	1.29475	CAF1vsALL
C6orf192	0.349007	5.47462	4.35742	9.98334e-05	0.0129704	1.29542	CAF1vsALL
IFI6	0.565849	7.10785	4.34105	0.000104885	0.0133446	1.25017	CAF1vsALL
PSG5	1.16237	5.36004	4.33145	0.000107964	0.0134997	1.22366	CAF1vsALL
ANTXR2	0.354778	7.77697	4.28512	0.000124111	0.014608	1.09594	CAF1vsALL
FAM167A	0.783048	5.18027	4.26037	0.000133686	0.0152772	1.02786	CAF1vsALL
TMEM51	0.708409	7.39484	4.24821	0.00013865	0.0156628	0.994469	CAF1vsALL
ADAMTS5	0.645519	6.22578	4.23162	0.000145718	0.0161916	0.948939	CAF1vsALL
TGFBR2	0.389674	7.42707	4.23141	0.00014581	0.0161916	0.948363	CAF1vsALL
GLRX	0.52594	8.54181	4.21829	0.000151648	0.0165475	0.912421	CAF1vsALL
PARP9	0.322856	5.92311	4.19376	0.000163193	0.0171521	0.84526	CAF1vsALL
SLC39A8	0.554537	5.35881	4.1786	0.000170747	0.0175842	0.803845	CAF1vsALL
TMTC1	0.769397	6.14595	4.16302	0.000178873	0.0180413	0.761303	CAF1vsALL
PDE8B	0.742958	5.72302	4.16256	0.000179116	0.0180413	0.760064	CAF1vsALL
RARRES3	0.919536	7.01737	4.16109	0.000179906	0.0180506	0.756037	CAF1vsALL
ABCC3	0.63247	6.23397	4.16023	0.000180363	0.0180506	0.753716	CAF1vsALL
TXNRD1	0.383787	8.0677	4.14729	0.000187458	0.0184673	0.718415	CAF1vsALL
IL6ST	0.412935	5.67395	4.12916	0.000197852	0.0190937	0.669054	CAF1vsALL
CYP27A1	0.481266	5.72819	4.10628	0.000211774	0.0199856	0.606873	CAF1vsALL
GPRC5A	0.58642	5.38556	4.09993	0.000215804	0.0200711	0.589638	CAF1vsALL
NR2F1	0.461679	7.67099	4.10055	0.000215411	0.0200711	0.591304	CAF1vsALL
ACVRL1	0.649581	5.47913	4.08613	0.000224826	0.0202869	0.552197	CAF1vsALL
LAYN	0.551425	6.65899	4.08793	0.000223625	0.0202869	0.557089	CAF1vsALL
CTSB	0.501232	7.81199	4.08543	0.000225295	0.0202869	0.550288	CAF1vsALL
NIPA1	0.408333	6.63882	4.08324	0.000226763	0.0203027	0.544355	CAF1vsALL
HSD17B6	1.16962	6.62995	4.07232	0.000234222	0.020563	0.514771	CAF1vsALL
RND3	0.494779	8.76236	4.07095	0.000235174	0.020563	0.511066	CAF1vsALL
ADM	0.436407	8.55964	4.06954	0.000236159	0.020563	0.507245	CAF1vsALL
APOD	0.85926	5.19151	4.06629	0.000238439	0.0206424	0.498463	CAF1vsALL
SLC15A3	0.531302	6.33441	4.05822	0.000244208	0.020783	0.476617	CAF1vsALL
LAMB1	0.39374	7.75693	4.05955	0.000243248	0.020783	0.480216	CAF1vsALL
ST3GAL1	0.354956	5.96302	4.0435	0.000255076	0.0210507	0.436836	CAF1vsALL
ZNF365	0.344202	5.12509	4.04436	0.000254432	0.0210507	0.439144	CAF1vsALL
GLCE	0.333077	6.27457	4.04714	0.000252345	0.0210507	0.446669	CAF1vsALL
PRDM1	0.472767	4.95431	4.03879	0.000258656	0.021113	0.424104	CAF1vsALL
FAM105A	0.751703	6.04087	4.03131	0.000264438	0.0212351	0.403906	CAF1vsALL
GAS6	0.60003	7.6684	4.03187	0.000263997	0.0212351	0.405433	CAF1vsALL
MOXD1	0.669187	6.92938	3.98743	0.000300974	0.0233541	0.285726	CAF1vsALL
PSG6	0.667239	4.83092	3.98401	0.000304018	0.0234168	0.276542	CAF1vsALL
PDPN	1.18454	5.59706	3.97181	0.000315128	0.0238807	0.24378	CAF1vsALL
LUM	0.870597	7.93656	3.96713	0.000319498	0.0240328	0.231212	CAF1vsALL
CYTSB	0.320472	4.94516	3.96764	0.000319015	0.0240328	0.232593	CAF1vsALL
NFE2L2	0.319771	8.23499	3.94896	0.000337011	0.0249785	0.182518	CAF1vsALL
DCN	0.548522	8.80897	3.93485	0.000351259	0.0255525	0.144741	CAF1vsALL
OSBPL10	0.428335	6.76738	3.92615	0.000360336	0.0259145	0.121471	CAF1vsALL
MEIS3P1	0.323443	6.88723	3.92047	0.000366374	0.026227	0.106316	CAF1vsALL
LOC392871	0.484323	5.21806	3.90651	0.000381661	0.026953	0.0690408	CAF1vsALL
ITGA2	0.58984	6.05497	3.88885	0.000401882	0.0279414	0.0219766	CAF1vsALL
MPZL1	0.42288	6.54156	3.88946	0.000401164	0.0279414	0.0236058	CAF1vsALL
XAF1	0.348457	5.70386	3.88337	0.000408363	0.0283294	0.00739349	CAF1vsALL
TERF1	0.339428	5.66904	3.87813	0.00041466	0.0285451	-0.0065518	CAF1vsALL
RHBDD2	0.32324	7.30896	3.8661	0.000429476	0.0290881	-0.0385447	CAF1vsALL
MFSD1	0.320144	8.08801	3.84942	0.000450861	0.0300185	-0.0828137	CAF1vsALL
PLD3	0.329761	6.91635	3.84317	0.000459137	0.0302491	-0.0993821	CAF1vsALL
PSG1	0.38647	4.71548	3.83891	0.000464864	0.0303005	-0.110673	CAF1vsALL
TMBIM1	0.355846	6.56742	3.82716	0.000481026	0.0307877	-0.141797	CAF1vsALL
C20orf199	0.38099	7.57599	3.82146	0.000489052	0.0310484	-0.156863	CAF1vsALL
FGF7	0.508132	5.24905	3.81552	0.00049757	0.031462	-0.172583	CAF1vsALL
CTSA	0.344685	7.14626	3.81433	0.00049929	0.0315074	-0.175726	CAF1vsALL
FAM20A	0.766576	5.34461	3.79833	0.000523007	0.0322908	-0.217966	CAF1vsALL
ZNF219	0.340245	5.12079	3.79435	0.000529068	0.0324103	-0.228453	CAF1vsALL
ALDH1A3	0.883809	7.03338	3.76629	0.000573827	0.0339814	-0.302339	CAF1vsALL
CEBPD	0.52256	8.12613	3.76307	0.000579204	0.0339814	-0.310822	CAF1vsALL
SH3PXD2A	0.458524	7.7796	3.765	0.000575973	0.0339814	-0.305734	CAF1vsALL
SLC7A7	0.465622	5.33554	3.75158	0.000598738	0.0348443	-0.340986	CAF1vsALL
SNCAIP	0.948748	6.28348	3.7488	0.000603567	0.0349915	-0.348291	CAF1vsALL
ISOC1	0.655094	7.4161	3.74718	0.000606395	0.0350302	-0.35254	CAF1vsALL
LTBR	0.385802	6.89981	3.74421	0.000611616	0.0350302	-0.360336	CAF1vsALL
PSG3	0.859382	5.13683	3.73825	0.000622202	0.0353587	-0.375937	CAF1vsALL
CTNS	0.317069	5.58924	3.73293	0.000631817	0.0356128	-0.389877	CAF1vsALL
KLHL5	0.382638	7.4073	3.71907	0.000657548	0.036126	-0.426156	CAF1vsALL
HEBP1	0.314236	8.11044	3.71946	0.00065682	0.036126	-0.42515	CAF1vsALL
LOC100132510	0.439822	5.70579	3.70773	0.000679348	0.0369754	-0.455792	CAF1vsALL
F3	1.12054	6.67754	3.70536	0.000684002	0.0370611	-0.461995	CAF1vsALL
GDF15	0.920772	6.54416	3.70347	0.000687712	0.0370704	-0.466909	CAF1vsALL
ASAP3	0.41451	6.58254	3.70044	0.000693727	0.0370801	-0.47482	CAF1vsALL
ANTXR1	0.400182	7.25	3.69999	0.000694634	0.0370801	-0.476007	CAF1vsALL
ST3GAL5	0.347925	5.82733	3.6987	0.00069722	0.037137	-0.479382	CAF1vsALL
ABCC4	0.669765	6.90854	3.69652	0.000701589	0.0373065	-0.485056	CAF1vsALL
PTK7	0.500935	5.7856	3.68174	0.000731986	0.0381482	-0.523576	CAF1vsALL
NKD2	0.668747	4.86731	3.66551	0.000766823	0.0389102	-0.565789	CAF1vsALL
FOXF1	0.631985	6.75969	3.6633	0.000771685	0.0389102	-0.571527	CAF1vsALL
PTPRK	0.362468	7.43945	3.66221	0.000774113	0.0389102	-0.574378	CAF1vsALL
GCLC	0.322706	5.85008	3.66065	0.000777559	0.0389102	-0.57841	CAF1vsALL
ORMDL3	0.31443	5.50219	3.66154	0.000775592	0.0389102	-0.57611	CAF1vsALL
PSG9	0.893494	5.08632	3.65499	0.000790261	0.0390632	-0.593116	CAF1vsALL
QPRT	0.744163	6.03488	3.6489	0.000804143	0.0394243	-0.608919	CAF1vsALL
FLRT3	0.566272	5.47794	3.64753	0.000807298	0.0395173	-0.612472	CAF1vsALL
SEMA3C	0.665749	7.02813	3.63716	0.000831558	0.0400806	-0.639336	CAF1vsALL
KCNT2	0.332929	5.05637	3.62418	0.00086295	0.04108	-0.672949	CAF1vsALL
LACTB	0.364872	6.4415	3.58937	0.000952798	0.0440981	-0.762744	CAF1vsALL
VTN	0.62159	5.11416	3.58644	0.000960775	0.044206	-0.770299	CAF1vsALL
IMPA2	0.624063	5.54036	3.56101	0.00103264	0.0460333	-0.835643	CAF1vsALL
TMEM154	0.351468	5.24078	3.56053	0.00103405	0.0460333	-0.836884	CAF1vsALL
SGCD	0.443057	5.56901	3.55167	0.00106029	0.0468039	-0.859578	CAF1vsALL
NINJ1	0.414975	7.44253	3.54994	0.0010655	0.0468039	-0.86401	CAF1vsALL
PSG4	1.10243	5.62912	3.54567	0.00107846	0.04702	-0.874957	CAF1vsALL
CLIC3	0.715853	5.601	3.54508	0.00108027	0.04702	-0.876474	CAF1vsALL
GBP2	0.574031	7.6087	3.53952	0.00109738	0.0472733	-0.890701	CAF1vsALL
SCPEP1	0.397123	6.97603	3.53097	0.0011242	0.0475494	-0.912559	CAF1vsALL
SFRP1	2.49044	7.32591	12.5583	6.09947e-15	1.91682e-10	23.2791	NAFvsALL
LXN	1.46702	8.93644	10.5839	9.05151e-13	4.74088e-09	18.7095	NAFvsALL
CMBL	1.01792	7.25125	8.96876	7.85387e-11	1.76297e-07	14.5451	NAFvsALL
GNG2	0.966637	5.50648	8.76954	1.39378e-10	2.92005e-07	14.0053	NAFvsALL
PTGER2	1.44929	6.64088	8.46234	3.40767e-10	5.0995e-07	13.1622	NAFvsALL
BAG2	0.604269	6.49625	8.03264	1.21233e-09	1.2963e-06	11.9619	NAFvsALL
LGALS3	0.534497	7.40487	8.02575	1.23748e-09	1.2963e-06	11.9425	NAFvsALL
PERP	0.673898	7.76265	7.96179	1.49752e-09	1.43825e-06	11.7618	NAFvsALL
RGS2	1.07905	7.77221	7.86759	1.9848e-09	1.59423e-06	11.4947	NAFvsALL
MDK	0.844421	6.2192	7.8332	2.20028e-09	1.59423e-06	11.397	NAFvsALL
NR2F1	0.765809	7.67099	7.6046	4.37927e-09	2.80863e-06	10.7438	NAFvsALL
NXN	0.638871	6.85643	7.57316	4.81617e-09	3.02706e-06	10.6534	NAFvsALL
RGS17	0.87287	5.71947	7.54919	5.17859e-09	3.10294e-06	10.5845	NAFvsALL
EFHD2	0.617781	7.24945	7.40732	7.9649e-09	4.16399e-06	10.1754	NAFvsALL
TKT	0.61107	7.6212	7.38461	8.53468e-09	4.16399e-06	10.1097	NAFvsALL
FLJ10986	0.413684	6.11296	7.39284	8.32361e-09	4.16399e-06	10.1335	NAFvsALL
LOC389599	0.359656	6.27576	7.41154	7.86334e-09	4.16399e-06	10.1876	NAFvsALL
TBL1X	0.508311	6.72387	7.30498	1.08782e-08	4.74804e-06	9.87896	NAFvsALL
DHRS3	1.46528	7.9434	7.30025	1.10366e-08	4.7512e-06	9.8652	NAFvsALL
EPHA4	0.924631	5.9012	7.19594	1.51794e-08	6.03833e-06	9.56196	NAFvsALL
SCARA3	0.760637	5.40488	7.16792	1.65388e-08	6.49684e-06	9.48033	NAFvsALL
C10orf116	1.21749	7.77208	7.13032	1.85583e-08	7.20016e-06	9.37066	NAFvsALL
GPX4	0.394052	8.76523	7.09616	2.06079e-08	7.80269e-06	9.27093	NAFvsALL
TMEM51	1.05505	7.39484	7.07377	2.20739e-08	8.25828e-06	9.2055	NAFvsALL
STRADB	0.345282	6.40488	7.06537	2.26504e-08	8.35882e-06	9.18095	NAFvsALL
SREBF1	0.436403	5.70699	7.00703	2.70974e-08	9.63462e-06	9.01024	NAFvsALL
SSX2IP	0.992178	5.68137	6.93706	3.3609e-08	1.14804e-05	8.8051	NAFvsALL
LRIG3	0.520219	5.14304	6.85428	4.33821e-08	1.43508e-05	8.56189	NAFvsALL
LTBP4	0.901969	6.40275	6.80608	5.03442e-08	1.63105e-05	8.42004	NAFvsALL
HMOX1	0.799634	5.78653	6.74165	6.14408e-08	1.89298e-05	8.23017	NAFvsALL
FLJ10081	0.305217	6.7165	6.67217	7.61858e-08	2.17656e-05	8.02509	NAFvsALL
ACAT1	0.316528	7.65805	6.66215	7.85879e-08	2.21556e-05	7.99549	NAFvsALL
C9orf103	0.428051	5.92903	6.64832	8.20294e-08	2.28129e-05	7.95462	NAFvsALL
ALDH1A3	1.39368	7.03338	6.64009	8.41506e-08	2.31975e-05	7.93028	NAFvsALL
MASP1	0.715124	5.8668	6.61081	9.21465e-08	2.51808e-05	7.84372	NAFvsALL
TSPAN5	0.55626	6.88695	6.52799	1.19158e-07	3.14676e-05	7.59854	NAFvsALL
LOC646688	0.382036	8.69902	6.4872	1.35258e-07	3.3735e-05	7.47765	NAFvsALL
SMAD3	0.49693	7.30731	6.47797	1.39194e-07	3.41744e-05	7.45028	NAFvsALL
HIBADH	0.367116	7.53476	6.4261	1.63564e-07	3.83594e-05	7.29638	NAFvsALL
RARRES1	1.83624	7.27565	6.42347	1.64905e-07	3.83875e-05	7.28859	NAFvsALL
SVEP1	1.27165	7.35038	6.39161	1.82096e-07	4.17703e-05	7.19398	NAFvsALL
NAMPT	0.608364	5.90678	6.37386	1.9244e-07	4.31973e-05	7.14126	NAFvsALL
NBL1	0.695265	7.86592	6.29178	2.48508e-07	5.42334e-05	6.89729	NAFvsALL
TGFBR3	1.05227	6.38033	6.26006	2.74335e-07	5.90497e-05	6.80294	NAFvsALL
TAF10	0.300407	7.2096	6.25141	2.81832e-07	5.98436e-05	6.77721	NAFvsALL
C1S	0.966264	7.58363	6.24155	2.90635e-07	6.06589e-05	6.74786	NAFvsALL
CCNG1	0.417946	7.57951	6.2408	2.91311e-07	6.06589e-05	6.74565	NAFvsALL
SLC39A11	0.367596	5.99185	6.23472	2.96883e-07	6.09795e-05	6.72756	NAFvsALL
FBLN1	1.49325	7.69981	6.21893	3.11878e-07	6.36433e-05	6.68054	NAFvsALL
FOXF1	0.955553	6.75969	6.19264	3.38535e-07	6.73794e-05	6.60228	NAFvsALL
SQSTM1	0.40526	9.14488	6.18307	3.48787e-07	6.83696e-05	6.5738	NAFvsALL
C1R	0.904098	6.55552	6.15264	3.83533e-07	7.3874e-05	6.48318	NAFvsALL
CEBPD	0.763356	8.12613	6.14593	3.91651e-07	7.43452e-05	6.46319	NAFvsALL
PRRT3	0.319512	5.87719	6.14283	3.95469e-07	7.44192e-05	6.45393	NAFvsALL
IGFBP6	0.826245	8.45633	6.1308	4.10597e-07	7.66663e-05	6.4181	NAFvsALL
RHOBTB3	0.862451	8.23167	6.07034	4.95911e-07	8.65806e-05	6.23793	NAFvsALL
ASAP3	0.607077	6.58254	6.05922	5.13433e-07	8.91444e-05	6.20479	NAFvsALL
SPATA7	0.383275	5.72011	5.97146	6.75396e-07	0.000112899	5.94312	NAFvsALL
MPP6	0.469236	6.08004	5.94854	7.25551e-07	0.000119378	5.87476	NAFvsALL
AVPI1	0.615636	7.49349	5.94311	7.37969e-07	0.000120163	5.85856	NAFvsALL
TAF9L	0.465444	5.90454	5.93691	7.52413e-07	0.000121883	5.84006	NAFvsALL
MRGPRF	0.709292	7.21399	5.93116	7.6606e-07	0.000123457	5.82291	NAFvsALL
S1PR1	0.699004	5.57322	5.89755	8.50913e-07	0.000134376	5.72265	NAFvsALL
BIN1	0.497545	6.82026	5.89459	8.58811e-07	0.000134945	5.71384	NAFvsALL
C22orf36	0.322879	5.27264	5.89116	8.6808e-07	0.000135723	5.70359	NAFvsALL
TNFRSF19	0.758758	5.76213	5.83522	1.03394e-06	0.000154617	5.53673	NAFvsALL
S1PR3	0.733883	6.93771	5.83788	1.02538e-06	0.000154617	5.54467	NAFvsALL
TRIM2	0.387053	5.99831	5.83511	1.0343e-06	0.000154617	5.5364	NAFvsALL
MOXD1	0.875197	6.92938	5.8305	1.04931e-06	0.000155545	5.52265	NAFvsALL
EBPL	0.424743	6.76305	5.81565	1.09918e-06	0.000161416	5.47834	NAFvsALL
MAN1A1	0.627264	5.76446	5.78616	1.20532e-06	0.000175363	5.39037	NAFvsALL
GATA2	0.48392	5.1729	5.78367	1.21476e-06	0.000175814	5.38293	NAFvsALL
AGPAT9	0.564897	5.3407	5.69525	1.60149e-06	0.000219774	5.11921	NAFvsALL
C18orf56	0.44707	5.54014	5.68894	1.6334e-06	0.000222876	5.10038	NAFvsALL
SLIT2	0.934453	6.65197	5.66396	1.76605e-06	0.000238059	5.02588	NAFvsALL
EDG1	0.517505	5.67354	5.64657	1.86465e-06	0.000248298	4.97406	NAFvsALL
CAPG	0.407454	5.22836	5.64034	1.90131e-06	0.000251052	4.95548	NAFvsALL
LPAR1	0.665422	7.58702	5.62288	2.00793e-06	0.000260605	4.90343	NAFvsALL
ATP6V0E2	0.616631	6.93534	5.62174	2.01512e-06	0.000260605	4.90002	NAFvsALL
TM7SF2	0.616287	5.6374	5.59398	2.19773e-06	0.000281901	4.81727	NAFvsALL
LY6E	0.517966	8.06568	5.58232	2.27923e-06	0.000289558	4.78253	NAFvsALL
NINJ1	0.582811	7.44253	5.5742	2.33781e-06	0.000293872	4.75833	NAFvsALL
PAMR1	0.742589	7.40805	5.55811	2.45829e-06	0.000306455	4.71039	NAFvsALL
ISOC1	0.860772	7.4161	5.50483	2.90337e-06	0.000349584	4.55168	NAFvsALL
SOD2	0.813138	6.24593	5.5001	2.9466e-06	0.000353234	4.53758	NAFvsALL
ABCA1	0.546173	7.11567	5.49118	3.0298e-06	0.000353957	4.51103	NAFvsALL
ELOVL5	0.347237	7.47443	5.4924	3.01821e-06	0.000353957	4.51468	NAFvsALL
ZADH2	0.316524	5.29212	5.49345	3.00837e-06	0.000353957	4.5178	NAFvsALL
LACTB2	0.46525	6.50145	5.48066	3.13092e-06	0.000361483	4.47972	NAFvsALL
LOC641814	0.395803	8.8458	5.4414	3.53905e-06	0.000392997	4.36287	NAFvsALL
C21orf63	0.614447	5.59707	5.42771	3.69354e-06	0.00040585	4.32213	NAFvsALL
SPATS2L	0.351253	7.99241	5.40047	4.02112e-06	0.000429822	4.24112	NAFvsALL
BNC2	0.498199	6.12704	5.38703	4.19323e-06	0.000438617	4.20116	NAFvsALL
C1RL	0.561233	6.2896	5.37637	4.33496e-06	0.000449605	4.16947	NAFvsALL
LAMA4	0.75145	7.01381	5.33197	4.9785e-06	0.000499854	4.03753	NAFvsALL
KIAA0513	0.40536	5.74096	5.32494	5.08879e-06	0.000507683	4.01664	NAFvsALL
LOC387867	0.305514	9.02343	5.3218	5.13881e-06	0.000511052	4.00732	NAFvsALL
PKIA	0.657544	5.59359	5.31877	5.18753e-06	0.000512373	3.99833	NAFvsALL
LRFN5	0.695809	5.21327	5.30963	5.33735e-06	0.000522528	3.97119	NAFvsALL
MDFIC	0.345978	5.35125	5.3028	5.45211e-06	0.000532106	3.95092	NAFvsALL
PECI	0.306249	7.15892	5.27088	6.02188e-06	0.000576546	3.85619	NAFvsALL
HGF	0.984607	5.65582	5.26271	6.17716e-06	0.000586476	3.83193	NAFvsALL
RARRES3	1.03964	7.01737	5.25988	6.23175e-06	0.000589877	3.82355	NAFvsALL
TNFAIP8	0.474769	5.70036	5.25606	6.30624e-06	0.000595135	3.81223	NAFvsALL
MID1	0.45596	5.42801	5.25408	6.34528e-06	0.000597026	3.80635	NAFvsALL
TSHZ1	0.536364	5.91671	5.24953	6.4357e-06	0.000603726	3.79287	NAFvsALL
CD9	0.566256	7.04045	5.23094	6.81906e-06	0.000626596	3.73774	NAFvsALL
LOC388588	0.494525	5.50676	5.2171	7.1191e-06	0.000641045	3.69672	NAFvsALL
PITPNC1	0.300593	5.04675	5.21745	7.1114e-06	0.000641045	3.69775	NAFvsALL
GTF2IP1	0.399045	6.61865	5.20088	7.48739e-06	0.000664686	3.64867	NAFvsALL
LOC729009	0.452008	8.90126	5.19339	7.6638e-06	0.000676418	3.62648	NAFvsALL
HS1BP3	0.301896	5.78143	5.19254	7.68412e-06	0.000676418	3.62396	NAFvsALL
TXNRD1	0.429305	8.0677	5.18674	7.824e-06	0.000686807	3.60678	NAFvsALL
KCNJ2	1.00336	6.06792	5.16515	8.36684e-06	0.000715505	3.54288	NAFvsALL
VAMP5	0.400986	7.77112	5.15878	8.53425e-06	0.000722904	3.52402	NAFvsALL
ARL9	0.312318	4.95346	5.12479	9.48445e-06	0.000791408	3.42348	NAFvsALL
GNPDA1	0.40154	7.31827	5.10972	9.9386e-06	0.000819765	3.37895	NAFvsALL
CCDC136	0.430251	5.62849	5.0957	1.03808e-05	0.000849547	3.33751	NAFvsALL
SMPDL3A	1.05976	7.11096	5.04249	1.22431e-05	0.000952354	3.18044	NAFvsALL
LPIN1	0.450084	7.46751	5.04312	1.22192e-05	0.000952354	3.18229	NAFvsALL
SLC2A12	0.847629	5.97451	5.01847	1.31889e-05	0.00100357	3.10961	NAFvsALL
ASAM	0.81329	6.66157	5.00353	1.38136e-05	0.00104273	3.06558	NAFvsALL
KITLG	0.566942	6.13489	5.00268	1.38499e-05	0.00104273	3.06308	NAFvsALL
MFSD1	0.371582	8.08801	4.99527	1.41712e-05	0.00105786	3.04126	NAFvsALL
TLE1	0.433127	6.2692	4.99312	1.42656e-05	0.00106235	3.03494	NAFvsALL
OLFML3	0.893788	6.899	4.98441	1.46557e-05	0.00108625	3.00928	NAFvsALL
LOC402560	0.322414	6.43117	4.9835	1.4697e-05	0.00108675	3.0066	NAFvsALL
SCD	0.626694	8.50585	4.98034	1.48412e-05	0.00109484	2.99731	NAFvsALL
ANKRD29	0.734447	5.60334	4.97405	1.51327e-05	0.00110575	2.9788	NAFvsALL
SIX4	0.43358	6.14292	4.96825	1.54067e-05	0.00111818	2.96173	NAFvsALL
SEMA3B	0.45427	5.38711	4.96265	1.5676e-05	0.00113287	2.94525	NAFvsALL
PPARG	0.742122	5.8075	4.96057	1.57772e-05	0.00113683	2.93912	NAFvsALL
TMEM158	0.821071	8.00051	4.95681	1.59616e-05	0.00114523	2.92807	NAFvsALL
LBA1	0.310189	5.3139	4.95082	1.62601e-05	0.00115609	2.91045	NAFvsALL
TMEM106B	0.491584	6.53395	4.94105	1.67588e-05	0.00118885	2.88172	NAFvsALL
SELENBP1	0.528769	5.73811	4.93151	1.72599e-05	0.0012189	2.8537	NAFvsALL
SEMA4B	0.309273	5.10627	4.91585	1.81157e-05	0.00125953	2.80767	NAFvsALL
ABCC3	0.666715	6.23397	4.90313	1.88415e-05	0.00128338	2.77032	NAFvsALL
CDC25B	0.420359	6.28399	4.89384	1.93894e-05	0.00131039	2.74306	NAFvsALL
FAM189B	0.308485	6.50119	4.89072	1.95771e-05	0.00131989	2.7339	NAFvsALL
ZCCHC24	0.375792	6.96564	4.88019	2.02237e-05	0.0013407	2.70301	NAFvsALL
HMHA1	0.354334	5.26528	4.87128	2.0787e-05	0.00136094	2.67689	NAFvsALL
CDC42EP4	0.530363	7.50934	4.86859	2.09604e-05	0.00136944	2.669	NAFvsALL
SLC25A22	0.344804	5.68717	4.86473	2.12111e-05	0.00138295	2.65769	NAFvsALL
PCOLCE	0.767022	8.17247	4.85833	2.16338e-05	0.0013989	2.63894	NAFvsALL
SOX15	0.33813	5.01082	4.85067	2.21508e-05	0.00142646	2.61649	NAFvsALL
TAF1D	0.302258	5.6002	4.84124	2.28038e-05	0.00145494	2.58887	NAFvsALL
LOC339352	0.327116	5.44986	4.83745	2.30722e-05	0.00146631	2.57775	NAFvsALL
GCLC	0.381123	5.85008	4.83362	2.33457e-05	0.00147321	2.56655	NAFvsALL
IL6ST	0.431637	5.67395	4.82562	2.39286e-05	0.00150102	2.54312	NAFvsALL
HOXA13	0.632251	6.332	4.82007	2.43406e-05	0.00152073	2.52689	NAFvsALL
DPH5	0.301105	6.26237	4.81795	2.45003e-05	0.00152465	2.52068	NAFvsALL
PLTP	0.448137	5.77195	4.81514	2.4713e-05	0.00153484	2.51247	NAFvsALL
HOPX	0.710629	5.1027	4.78549	2.70742e-05	0.00166312	2.42577	NAFvsALL
ZFP36L2	0.465154	6.24825	4.78398	2.72e-05	0.00166625	2.42136	NAFvsALL
SMAD6	0.58754	6.14423	4.77871	2.76438e-05	0.00168359	2.40599	NAFvsALL
TMEM54	0.32231	5.92309	4.77177	2.82404e-05	0.00170999	2.3857	NAFvsALL
TGFBR2	0.392506	7.42707	4.76524	2.8813e-05	0.00172792	2.36664	NAFvsALL
RAB26	0.339343	4.81674	4.75475	2.97567e-05	0.00177109	2.33603	NAFvsALL
LTBP3	0.31683	5.35469	4.75248	2.99653e-05	0.00177677	2.3294	NAFvsALL
PLK2	0.437251	5.27966	4.74174	3.09698e-05	0.00182258	2.29808	NAFvsALL
GALM	0.308228	5.65398	4.73853	3.12771e-05	0.0018338	2.28871	NAFvsALL
REEP2	0.503274	5.91739	4.73351	3.17628e-05	0.00185191	2.27407	NAFvsALL
ADHFE1	0.317833	5.34643	4.72274	3.28295e-05	0.00188956	2.24271	NAFvsALL
CSDC2	0.609891	5.83437	4.71227	3.39011e-05	0.00193353	2.21221	NAFvsALL
LOC645381	0.337957	6.00994	4.70874	3.42707e-05	0.00195107	2.20192	NAFvsALL
DDIT4L	0.613175	5.72098	4.70353	3.48231e-05	0.00197294	2.18674	NAFvsALL
MFSD6	0.602214	6.05089	4.70334	3.48431e-05	0.00197294	2.18619	NAFvsALL
ABHD5	0.36249	6.56383	4.68914	3.63934e-05	0.00204597	2.14487	NAFvsALL
KRT13	0.546385	4.80574	4.68703	3.66287e-05	0.0020519	2.13875	NAFvsALL
ACO1	0.359122	8.39243	4.68703	3.66294e-05	0.0020519	2.13874	NAFvsALL
UBE2L6	0.412116	6.84468	4.68202	3.71961e-05	0.00206889	2.12417	NAFvsALL
MATN2	0.985961	6.73909	4.67909	3.75313e-05	0.00208278	2.11565	NAFvsALL
GULP1	0.382569	6.0744	4.66855	3.87618e-05	0.00213333	2.08503	NAFvsALL
ME1	0.416883	7.29272	4.66637	3.90226e-05	0.0021419	2.07867	NAFvsALL
ANKRD35	0.44105	5.84738	4.66159	3.95977e-05	0.00214922	2.06479	NAFvsALL
TMEM26	0.407337	5.19344	4.6477	4.13168e-05	0.00221188	2.02446	NAFvsALL
FTHL3	0.431663	8.01629	4.63747	4.26296e-05	0.00225535	1.99479	NAFvsALL
CACNB3	0.309265	6.72989	4.63097	4.34859e-05	0.00228526	1.97592	NAFvsALL
PYCARD	0.49865	6.06438	4.62237	4.46435e-05	0.00233828	1.951	NAFvsALL
ACSL3	0.340052	6.69547	4.62108	4.48203e-05	0.00234363	1.94725	NAFvsALL
GLB1L	0.339578	4.99206	4.59097	4.91377e-05	0.00250276	1.86003	NAFvsALL
OXCT2	0.332783	5.16238	4.58597	4.98926e-05	0.0025371	1.84557	NAFvsALL
RPS7	0.396668	6.78723	4.57621	5.14006e-05	0.00259697	1.81734	NAFvsALL
FBN2	1.01796	8.31389	4.57061	5.22862e-05	0.00262904	1.80114	NAFvsALL
CLDN11	0.950157	9.28302	4.53421	5.84185e-05	0.00289112	1.69602	NAFvsALL
COL6A3	0.402596	9.16971	4.52991	5.91885e-05	0.00292003	1.68362	NAFvsALL
PDE7B	0.55553	5.19368	4.52654	5.97989e-05	0.00293807	1.67389	NAFvsALL
GBGT1	0.351158	5.19415	4.51541	6.18591e-05	0.00298714	1.6418	NAFvsALL
FTH1	0.480679	7.91461	4.51287	6.23383e-05	0.00300007	1.63449	NAFvsALL
RASL12	0.512673	5.06508	4.50987	6.29106e-05	0.00302298	1.62583	NAFvsALL
GCLM	0.479012	6.99406	4.50702	6.3458e-05	0.00304103	1.61762	NAFvsALL
MYLIP	0.574015	6.42443	4.4949	6.58387e-05	0.0031279	1.58273	NAFvsALL
TNFRSF14	0.544703	6.9461	4.49379	6.60609e-05	0.0031279	1.57954	NAFvsALL
GALNT12	0.820991	5.60426	4.48226	6.84146e-05	0.00319465	1.54638	NAFvsALL
FTHL2	0.357107	8.08679	4.47743	6.9427e-05	0.00322277	1.53247	NAFvsALL
COQ2	0.318928	6.94214	4.46901	7.12234e-05	0.00329157	1.50827	NAFvsALL
CCDC109B	0.501205	6.8244	4.46713	7.16313e-05	0.00329341	1.50287	NAFvsALL
TPMT	0.347312	6.6377	4.46391	7.23355e-05	0.00331372	1.4936	NAFvsALL
MEIS1	0.447274	7.097	4.46288	7.25599e-05	0.00331885	1.49067	NAFvsALL
SNCA	1.18177	6.31124	4.4597	7.32653e-05	0.00334171	1.48151	NAFvsALL
MKX	0.769614	7.41331	4.43763	7.83334e-05	0.0035069	1.41818	NAFvsALL
ABLIM1	0.308752	5.44536	4.43761	7.83377e-05	0.0035069	1.41813	NAFvsALL
NUCB2	0.310586	7.984	4.4362	7.8673e-05	0.0035169	1.41409	NAFvsALL
LOC729217	0.34533	6.37573	4.43071	7.99924e-05	0.00355737	1.39835	NAFvsALL
BLVRB	0.352364	6.08168	4.42465	8.14746e-05	0.00360116	1.38097	NAFvsALL
C6orf115	0.402234	6.94034	4.41208	8.46356e-05	0.0037044	1.34495	NAFvsALL
DUSP5	0.752944	7.02747	4.40688	8.59777e-05	0.00373712	1.33006	NAFvsALL
ZNF581	0.335557	6.44316	4.4073	8.58684e-05	0.00373712	1.33126	NAFvsALL
MOCOS	0.911604	5.84422	4.39721	8.85276e-05	0.00383205	1.3024	NAFvsALL
WDR70	0.336532	6.26929	4.3913	9.01254e-05	0.0038865	1.28548	NAFvsALL
SRGAP1	0.32638	5.95221	4.38741	9.11892e-05	0.00392026	1.27438	NAFvsALL
ALDH6A1	0.396495	5.94554	4.38429	9.20534e-05	0.00393904	1.26546	NAFvsALL
FAM180A	0.477388	4.97634	4.38162	9.28008e-05	0.00396244	1.25781	NAFvsALL
ZFHX4	0.494298	5.27639	4.36572	9.73653e-05	0.00410836	1.21239	NAFvsALL
RGS10	0.507787	6.97405	4.35824	9.95876e-05	0.00417842	1.19105	NAFvsALL
NLGN1	0.705123	5.88302	4.35069	0.00010188	0.00425392	1.16953	NAFvsALL
STOM	0.505874	8.30136	4.34281	0.00010433	0.00433685	1.14706	NAFvsALL
NR1H3	0.432854	5.53516	4.33758	0.000105987	0.00438435	1.13216	NAFvsALL
OCIAD2	0.43766	6.62396	4.31152	0.000114642	0.00465134	1.05796	NAFvsALL
RPL13	0.337641	6.83965	4.31121	0.000114748	0.00465134	1.05709	NAFvsALL
C2orf32	0.318813	6.35606	4.3109	0.000114855	0.00465134	1.05621	NAFvsALL
ALDH1A1	1.2469	8.22353	4.29949	0.000118866	0.00477684	1.02377	NAFvsALL
RPS6KA6	0.424884	5.03931	4.29894	0.000119062	0.004777	1.02221	NAFvsALL
CTXN1	0.506166	7.24776	4.28169	0.000125396	0.00498193	0.973239	NAFvsALL
PPP2R5A	0.335514	5.83701	4.26817	0.000130593	0.00514286	0.934885	NAFvsALL
HSD17B11	0.431172	6.32901	4.26542	0.000131677	0.0051726	0.927075	NAFvsALL
PARP1	0.302935	7.23872	4.25907	0.000134208	0.00522628	0.909096	NAFvsALL
STAMBPL1	0.664964	7.08441	4.24567	0.00013971	0.00536084	0.871153	NAFvsALL
PHLDA1	0.454751	7.23074	4.24589	0.00013962	0.00536084	0.871763	NAFvsALL
MOSPD1	0.348454	5.9547	4.23946	0.000142336	0.00545496	0.85357	NAFvsALL
KAZALD1	0.484077	5.61639	4.23308	0.00014508	0.00552639	0.835548	NAFvsALL
LOC650494	0.475599	5.06153	4.22978	0.000146521	0.00556108	0.826215	NAFvsALL
GAS1	0.954701	6.70242	4.2259	0.000148233	0.00557778	0.81525	NAFvsALL
SLC6A15	0.52615	4.93953	4.22494	0.000148663	0.00557778	0.812518	NAFvsALL
PRSS12	0.52171	5.73133	4.22477	0.000148736	0.00557778	0.812052	NAFvsALL
EYA2	0.593052	5.16336	4.22118	0.000150343	0.00561125	0.801911	NAFvsALL
LSS	0.369577	5.89938	4.20874	0.000156043	0.00576239	0.766792	NAFvsALL
C1orf85	0.320171	7.41937	4.19977	0.000160284	0.00588074	0.741488	NAFvsALL
HEBP2	0.300353	8.38015	4.19959	0.00016037	0.00588074	0.740979	NAFvsALL
METTL7A	0.468708	5.49777	4.19273	0.000163692	0.00595391	0.721637	NAFvsALL
CYP27A1	0.437532	5.72819	4.17377	0.000173226	0.00618613	0.668236	NAFvsALL
ZNF364	0.322559	7.08507	4.16774	0.000176369	0.00626986	0.651279	NAFvsALL
RAB8B	0.425065	7.13575	4.14839	0.000186844	0.00659007	0.596874	NAFvsALL
PDE5A	0.615478	6.93407	4.13277	0.000195737	0.00684992	0.553042	NAFvsALL
SPATA20	0.332415	6.5562	4.13119	0.000196657	0.00687448	0.548619	NAFvsALL
REV3L	0.313864	5.3286	4.12879	0.000198068	0.00690078	0.541881	NAFvsALL
CPXM2	1.15174	5.31732	4.12799	0.000198541	0.00690958	0.539635	NAFvsALL
AHNAK2	0.851969	6.14718	4.12306	0.000201471	0.00698832	0.52583	NAFvsALL
ITPKA	0.538989	5.10038	4.12269	0.000201695	0.00698838	0.524782	NAFvsALL
BLVRA	0.318684	7.60376	4.11536	0.000206135	0.00706434	0.504262	NAFvsALL
TIMP4	0.425898	5.10061	4.11233	0.000208002	0.00710678	0.495767	NAFvsALL
ENPP1	0.489356	5.36451	4.10246	0.000214191	0.00726909	0.468141	NAFvsALL
ANTXR2	0.30311	7.77697	4.0932	0.000220161	0.00741564	0.442243	NAFvsALL
TCF21	0.606902	6.42602	4.08373	0.000226428	0.00757799	0.415808	NAFvsALL
C14orf78	0.710364	5.75329	4.07769	0.000230523	0.00769046	0.39893	NAFvsALL
CTSB	0.447263	7.81199	4.07584	0.000231792	0.00771375	0.393759	NAFvsALL
TSTD1	0.302642	4.90889	4.07602	0.00023167	0.00771375	0.394257	NAFvsALL
LAMA2	0.496057	5.77706	4.07373	0.000233243	0.0077453	0.387886	NAFvsALL
PDE1A	0.518532	5.07395	4.06922	0.000236379	0.00780299	0.375309	NAFvsALL
NFKBIA	0.349689	7.25	4.0469	0.000252528	0.00821525	0.3131	NAFvsALL
CLDN23	0.831609	5.94604	4.04543	0.000253628	0.00824253	0.309006	NAFvsALL
LOC100133372	0.316454	8.0078	4.04027	0.000257523	0.0083432	0.294666	NAFvsALL
CADPS2	0.388532	5.09411	4.03986	0.000257842	0.00834494	0.2935	NAFvsALL
C14orf132	0.497439	6.80521	4.03221	0.000263731	0.00849419	0.272249	NAFvsALL
STEAP2	0.469127	5.07954	4.02156	0.000272159	0.00863907	0.242653	NAFvsALL
LOC100131810	0.339582	5.90833	4.02123	0.000272428	0.00863907	0.241724	NAFvsALL
CTSA	0.324722	7.14626	4.01756	0.000275391	0.00871544	0.231548	NAFvsALL
SPTLC3	0.394854	4.82672	4.01412	0.000278205	0.00879565	0.221984	NAFvsALL
SAT1	0.409189	8.33892	4.00624	0.000284744	0.0089216	0.200133	NAFvsALL
EYA1	0.466263	5.01042	4.00535	0.000285496	0.00893625	0.197653	NAFvsALL
TMEM35	0.560615	5.23012	3.96546	0.000321072	0.00980564	0.0872461	NAFvsALL
RASL11A	0.553086	5.68236	3.96188	0.000324465	0.00987089	0.0773675	NAFvsALL
LOC100132199	0.322199	5.38409	3.95505	0.00033104	0.0100321	0.0585162	NAFvsALL
PBX3	0.47185	7.42966	3.95376	0.000332295	0.0100507	0.0549616	NAFvsALL
ALDH2	0.485293	6.80409	3.94008	0.000345908	0.010343	0.0172408	NAFvsALL
PGM5	0.728294	6.5132	3.93608	0.000349998	0.0104158	0.00620133	NAFvsALL
RNF144	0.634438	4.9332	3.9349	0.000351204	0.0104319	0.00296921	NAFvsALL
IRS1	0.3526	6.05484	3.93091	0.000355344	0.010525	-0.00803688	NAFvsALL
PPAP2B	0.583905	7.10952	3.92371	0.000362918	0.0106989	-0.0278413	NAFvsALL
INTS8	0.341605	6.19843	3.92184	0.000364907	0.0107374	-0.0329742	NAFvsALL
HOXA5	0.691524	5.80489	3.91963	0.000367284	0.010767	-0.0390702	NAFvsALL
TMOD1	0.688775	5.81479	3.91494	0.000372364	0.0108653	-0.0519681	NAFvsALL
FUT8	0.30935	5.47257	3.9129	0.000374589	0.0108898	-0.057562	NAFvsALL
GK	0.4644	5.61882	3.90772	0.000380309	0.0110101	-0.0717881	NAFvsALL
RPL12P6	0.314211	6.43903	3.90491	0.000383456	0.011086	-0.0795245	NAFvsALL
MET	0.533483	6.48741	3.90373	0.000384782	0.0111039	-0.0827647	NAFvsALL
AKR1C4	0.827521	6.41709	3.89105	0.000399308	0.0113768	-0.117542	NAFvsALL
TWIST2	0.367191	5.64244	3.88957	0.000401037	0.0114077	-0.121597	NAFvsALL
PRDM8	0.73758	6.57829	3.88726	0.000403754	0.0114402	-0.127934	NAFvsALL
TPST1	0.355581	7.18947	3.88741	0.000403572	0.0114402	-0.127511	NAFvsALL
EVI1	0.346892	5.11676	3.88389	0.000407744	0.0115128	-0.137161	NAFvsALL
SLC38A6	0.307042	6.08581	3.87159	0.000422651	0.0118675	-0.170846	NAFvsALL
LOC653156	0.309053	7.39284	3.86275	0.000433684	0.0121146	-0.195016	NAFvsALL
CROT	0.433916	5.809	3.86044	0.000436619	0.0121642	-0.201342	NAFvsALL
ISL1	0.968101	6.18734	3.85948	0.00043784	0.0121874	-0.203962	NAFvsALL
LOC645691	0.324968	6.77495	3.85501	0.000443578	0.0122927	-0.216171	NAFvsALL
SDC4	0.370906	7.03985	3.83592	0.000468921	0.0128814	-0.268261	NAFvsALL
GFPT2	0.395891	5.20277	3.82901	0.000478438	0.01308	-0.287092	NAFvsALL
PDGFRL	0.660539	6.76268	3.8233	0.000486453	0.0132034	-0.302661	NAFvsALL
NTNG1	0.569054	4.97152	3.81032	0.000505139	0.0135979	-0.337978	NAFvsALL
SLC9A9	0.379201	5.3945	3.80761	0.000509125	0.013675	-0.345341	NAFvsALL
SLC16A4	0.467253	5.54728	3.80461	0.000513571	0.0137622	-0.353487	NAFvsALL
NAV2	0.358759	5.89911	3.79626	0.000526159	0.0140128	-0.376167	NAFvsALL
LRIG1	0.535953	6.38134	3.78507	0.000543482	0.0142686	-0.4065	NAFvsALL
GBP2	0.548412	7.6087	3.78069	0.000550421	0.0143906	-0.418378	NAFvsALL
RGS20	0.420839	5.35684	3.77064	0.000566659	0.0147118	-0.445595	NAFvsALL
PIR	0.498658	6.37809	3.75556	0.0005919	0.0151598	-0.486378	NAFvsALL
LOC642567	0.400553	6.0267	3.74817	0.000604656	0.0154236	-0.506326	NAFvsALL
FAIM2	0.635351	5.22314	3.7376	0.000623385	0.0157353	-0.534861	NAFvsALL
NT5C3	0.300518	6.86737	3.73668	0.000625025	0.0157641	-0.537318	NAFvsALL
ANGPTL2	0.561763	7.20364	3.73484	0.000628361	0.0157975	-0.542297	NAFvsALL
RNF115	0.329027	6.23807	3.72922	0.000638607	0.0160166	-0.557422	NAFvsALL
NFIX	0.395003	8.25587	3.72309	0.00064999	0.0161859	-0.573942	NAFvsALL
PGD	0.388174	7.56893	3.72143	0.000653107	0.0162249	-0.578415	NAFvsALL
IDH1	0.453355	7.44579	3.71265	0.000669806	0.0165065	-0.602017	NAFvsALL
NRP1	0.488021	6.68523	3.70641	0.000681942	0.0166929	-0.6188	NAFvsALL
LOC729926	0.317958	7.69371	3.70607	0.000682604	0.0166929	-0.619707	NAFvsALL
MOSC1	0.341736	5.0807	3.70143	0.000691762	0.0168261	-0.632162	NAFvsALL
SPATA18	0.448656	5.95545	3.69973	0.000695152	0.0168694	-0.63673	NAFvsALL
FADS1	0.383416	7.13928	3.69527	0.000704103	0.0169947	-0.648684	NAFvsALL
CD68	0.417121	6.45288	3.6846	0.000726013	0.0174299	-0.677313	NAFvsALL
FAM20C	0.319603	5.70504	3.68285	0.000729658	0.0174773	-0.68199	NAFvsALL
KLHL13	0.521521	5.18291	3.67786	0.000740167	0.0176483	-0.695347	NAFvsALL
PTGES	0.380484	5.41831	3.67437	0.000747618	0.017772	-0.704701	NAFvsALL
MMD	0.611077	6.80425	3.66439	0.000769285	0.0181362	-0.731378	NAFvsALL
DTWD1	0.334443	6.48582	3.66032	0.000778298	0.0183212	-0.742253	NAFvsALL
AMOT	0.372954	5.27013	3.65642	0.000787039	0.0184854	-0.752677	NAFvsALL
EFCAB4A	0.351228	4.88695	3.65529	0.000789593	0.0185064	-0.755702	NAFvsALL
NKX3-1	0.342499	5.54089	3.65368	0.000793238	0.018565	-0.760001	NAFvsALL
PTGER1	0.621825	5.79888	3.653	0.000794773	0.0185784	-0.761805	NAFvsALL
AKR1B1	0.355901	7.78167	3.64806	0.000806073	0.0187108	-0.774981	NAFvsALL
ABCC4	0.591057	6.90854	3.64716	0.000808144	0.0187291	-0.777376	NAFvsALL
COL14A1	0.814767	6.44601	3.63608	0.000834137	0.0192041	-0.806916	NAFvsALL
CH25H	0.547803	5.12052	3.61834	0.000877418	0.020039	-0.8541	NAFvsALL
DENND2A	0.699078	5.90017	3.60992	0.000898718	0.020466	-0.876466	NAFvsALL
TTC39C	0.300362	5.75563	3.60872	0.000901795	0.0205212	-0.879652	NAFvsALL
LOC646345	0.443962	5.07122	3.60662	0.000907193	0.0206291	-0.885217	NAFvsALL
TMEM91	0.32187	5.65379	3.60576	0.000909438	0.0206354	-0.887521	NAFvsALL
LOC283683	0.46416	5.4275	3.60493	0.000911588	0.0206586	-0.889722	NAFvsALL
C6orf141	0.427332	4.99529	3.59929	0.000926309	0.0209275	-0.904655	NAFvsALL
SCARNA9	0.395058	5.58659	3.59901	0.000927051	0.0209292	-0.905401	NAFvsALL
MANSC1	0.313867	5.47802	3.59563	0.000936022	0.0210863	-0.914377	NAFvsALL
LOC100134304	0.303446	6.15162	3.58014	0.000978118	0.0216926	-0.955369	NAFvsALL
RARB	0.542241	5.44613	3.57913	0.000980934	0.0217397	-0.958047	NAFvsALL
KCNMA1	0.561222	5.80072	3.57595	0.000989805	0.02189	-0.966434	NAFvsALL
CAMK2N1	0.31083	8.58674	3.5756	0.000990785	0.0218962	-0.967356	NAFvsALL
PLAT	0.618132	7.91486	3.57242	0.000999787	0.0220486	-0.97578	NAFvsALL
BDKRB2	0.472669	5.475	3.54458	0.00108179	0.0233491	-1.04918	NAFvsALL
LHFPL2	0.380716	6.73121	3.5387	0.00109991	0.0236427	-1.06463	NAFvsALL
LOC100129685	0.305481	7.2298	3.517	0.00116937	0.024623	-1.12161	NAFvsALL
DRAM1	0.362688	7.60172	3.51516	0.00117547	0.0247092	-1.12644	NAFvsALL
MALL	0.985366	6.20974	3.48594	0.00127621	0.0262818	-1.20287	NAFvsALL
CA5B	0.395237	5.53044	3.48468	0.00128073	0.0263232	-1.20616	NAFvsALL
C6orf117	0.809684	5.16339	3.48071	0.00129509	0.0265489	-1.21652	NAFvsALL
SERPINF1	0.911483	6.24057	3.45603	0.00138788	0.0280666	-1.28078	NAFvsALL
MEIS2	0.391631	5.80621	3.44728	0.00142231	0.0285424	-1.30353	NAFvsALL
CNKSR3	0.406607	6.54985	3.43215	0.00148373	0.0294181	-1.34276	NAFvsALL
ASS1	0.491962	6.4483	3.42931	0.00149554	0.0296149	-1.35011	NAFvsALL
TRIB1	0.510476	6.52091	3.41988	0.00153538	0.0300255	-1.3745	NAFvsALL
OBFC2A	0.423336	7.86238	3.41767	0.0015449	0.0301365	-1.38023	NAFvsALL
FTHL11	0.330743	8.48689	3.4117	0.00157082	0.0305095	-1.39565	NAFvsALL
GPR56	0.676248	5.34049	3.41089	0.00157436	0.0305596	-1.39774	NAFvsALL
ANKRD9	0.358287	6.26806	3.40854	0.0015847	0.0307033	-1.40381	NAFvsALL
NPW	0.439837	5.23844	3.40248	0.00161164	0.0311292	-1.41943	NAFvsALL
IL7	0.357953	4.98155	3.40086	0.00161893	0.0312317	-1.42362	NAFvsALL
FASN	0.411299	7.47274	3.39612	0.0016404	0.0314913	-1.43583	NAFvsALL
ZNF521	0.380223	5.06857	3.38706	0.00168222	0.0320326	-1.45915	NAFvsALL
OSR1	0.486252	6.9643	3.3835	0.00169897	0.0322608	-1.46833	NAFvsALL
RNF144A	0.485452	4.88224	3.37262	0.001751	0.0328716	-1.49627	NAFvsALL
LOC100132673	0.379808	8.09876	3.34931	0.00186778	0.0345276	-1.55603	NAFvsALL
G6PD	0.360803	7.13901	3.32628	0.00199036	0.0359891	-1.61482	NAFvsALL
HRH1	0.305642	5.58662	3.32049	0.00202241	0.036422	-1.62958	NAFvsALL
TBX3	0.337913	5.71524	3.31267	0.00206639	0.0369178	-1.64947	NAFvsALL
SOCS2	0.533418	5.97463	3.31029	0.00207996	0.0370549	-1.65551	NAFvsALL
PROS1	0.48603	5.98564	3.30385	0.00211714	0.0375332	-1.67188	NAFvsALL
KCTD12	0.36891	5.18985	3.29548	0.00216638	0.0381832	-1.69312	NAFvsALL
BAALC	0.35158	4.99942	3.28512	0.00222886	0.038935	-1.71938	NAFvsALL
MARCKSL1	0.340369	6.79657	3.24698	0.00247401	0.0418677	-1.81565	NAFvsALL
CGNL1	0.388479	5.14424	3.2272	0.00261103	0.0435622	-1.86534	NAFvsALL
SEMA3A	0.632567	6.04532	3.22551	0.00262307	0.0436845	-1.86957	NAFvsALL
CXCL6	0.580566	5.38244	3.2242	0.00263246	0.0437713	-1.87287	NAFvsALL
HTR2B	0.483112	5.42651	3.21738	0.00268175	0.0444497	-1.88995	NAFvsALL
BDKRB1	0.619361	5.74339	3.21415	0.00270539	0.0447706	-1.89803	NAFvsALL
ANXA10	0.446809	5.17377	3.20299	0.00278866	0.0458349	-1.92595	NAFvsALL
LOC100192378	0.389935	4.99499	3.19489	0.00285055	0.04656	-1.94615	NAFvsALL
FST	0.568578	7.288	3.18983	0.00288993	0.0470863	-1.95877	NAFvsALL
SLC24A6	0.349985	6.46796	3.18773	0.0029064	0.0472756	-1.964	NAFvsALL
LIFR	0.368327	5.45496	3.18235	0.00294901	0.0476237	-1.97739	NAFvsALL
BRIX1	0.391243	7.70229	3.17929	0.00297353	0.0478371	-1.98501	NAFvsALL
LSAMP	0.325441	5.22515	3.17829	0.00298154	0.0479028	-1.98748	NAFvsALL
EML1	0.40172	6.163	3.17628	0.00299781	0.0480581	-1.99249	NAFvsALL
RELN	0.681474	5.22089	3.17449	0.00301233	0.0481269	-1.99693	NAFvsALL
FTHL8	0.301637	8.36185	3.17205	0.00303227	0.048298	-2.00299	NAFvsALL
FGF13	0.408854	5.05972	3.16707	0.00307332	0.0485582	-2.01536	NAFvsALL
CDKN3	0.475745	6.11042	3.15156	0.00320465	0.049955	-2.05381	NAFvsALL

## Sheet: Table S4
ID	Description	GeneRatio	BgRatio	pvalue	p.adjust	qvalue	geneID	Count	Cluster	group
GOBP_CHROMOSOME_SEGREGATION	GOBP_CHROMOSOME_SEGREGATION	29/332	286/15048	7.43731e-12	1.92701e-08	1.75286e-08	SMC2/NCAPD2/MKI67/RMI1/PSRC1/CENPH/KIF4A/NUF2/KIFC1/OIP5/KIF14/SPAG5/SPC25/TACC3/HJURP/EME1/TTK/CCNB1/SMC4/NUP37/DLGAP5/SLC25A5/KPNB1/SPC24/NUP62/TOP2A/CENPQ/ANAPC7/MSH5	29	Unknown Up (460)	Unknown Up (460)
GOBP_DNA_REPAIR	GOBP_DNA_REPAIR	35/332	433/15048	3.15681e-11	4.08964e-08	3.72005e-08	EXO1/NEIL3/UCHL5/CHAF1A/RFC4/ATRIP/MSH2/RMI1/RAD54L/TIMELESS/CHAF1B/RAD51AP1/POLD1/RAD54B/RRM1/FANCG/SUPT16H/RFC5/RFWD3/BLM/DEK/EME1/BCCIP/RECQL4/MCM6/RPA3/DTL/TRIM28/CDK2/EYA3/SSRP1/PSMD14/OTUB1/PRKDC/GTF2H5	35	Unknown Up (460)	Unknown Up (460)
GOBP_ACTIN_FILAMENT_ORGANIZATION	GOBP_ACTIN_FILAMENT_ORGANIZATION	41/483	407/15048	8.27334e-11	2.9784e-07	2.58128e-07	DAAM2/MYO1B/MYO1E/ACTR2/CYFIP2/MICAL2/CLASP2/ESAM/ELN/MPRIP/DLC1/PLS3/FHOD1/BCAR1/ARPC5/DIAPH3/FMN2/SORBS2/RGS4/TMSB15A/NEDD9/ENAH/SEMA5A/EPS8/AIF1L/SHROOM3/MYO1D/CORO1C/PDXP/TPM1/FAT1/PLEKHG2/SH3KBP1/SYNPO2/CALD1/FCHSD2/ITGB5/SPIRE1/RHOB/ACTR3/STMN1	41	CAF2 Up (679)	CAF2 Up (679)
GOBP_DNA_REPLICATION	GOBP_DNA_REPLICATION	24/332	241/15048	7.38543e-10	6.37855e-07	5.8021e-07	UCHL5/CHAF1A/RFC4/RMI1/POLA2/TIMELESS/CHAF1B/POLD1/RRM1/SUPT16H/RFC5/RFWD3/BLM/GMNN/EME1/RECQL4/MCM6/RPA3/DTL/GTPBP4/CDK2/SSRP1/DNAJC2/SENP2	24	Unknown Up (460)	Unknown Up (460)
GOBP_RIBONUCLEOPROTEIN_COMPLEX_BIOGENESIS	GOBP_RIBONUCLEOPROTEIN_COMPLEX_BIOGENESIS	29/332	359/15048	1.7245e-09	1.11704e-06	1.01609e-06	MRTO4/EXOSC9/PRMT5/NOP56/MRPL20/DKC1/MRPL1/MRPS7/DDX56/PTGES3/GTPBP4/HSP90AB1/RPS7/POP5/RPF2/GEMIN5/EXOSC10/LSM4/RPP40/FRG1/CLP1/ERI1/WDR74/TSC1/RPF1/PRKDC/GTF2H5/NOP14/CPSF6	29	Unknown Up (460)	Unknown Up (460)
GOBP_NUCLEAR_CHROMOSOME_SEGREGATION	GOBP_NUCLEAR_CHROMOSOME_SEGREGATION	23/332	235/15048	2.36665e-09	1.2264e-06	1.11556e-06	SMC2/NCAPD2/RMI1/PSRC1/KIF4A/NUF2/KIFC1/KIF14/SPAG5/SPC25/TACC3/EME1/TTK/CCNB1/SMC4/DLGAP5/KPNB1/SPC24/NUP62/TOP2A/CENPQ/ANAPC7/MSH5	23	Unknown Up (460)	Unknown Up (460)
GOBP_ORGANELLE_FISSION	GOBP_ORGANELLE_FISSION	31/332	418/15048	3.65359e-09	1.57774e-06	1.43515e-06	SMC2/NCAPD2/MKI67/RMI1/RAD54L/PSRC1/KIF4A/CDC25C/RAD51AP1/NUF2/KIFC1/RAD54B/KIF14/SPAG5/PRMT5/TACC3/KIF20B/EME1/BCCIP/ASPM/TTK/CCNB1/SMC4/DLGAP5/KPNB1/ING2/NUP62/TOP2A/CDC25B/ANAPC7/MSH5	31	Unknown Up (460)	Unknown Up (460)
GOBP_DNA_CONFORMATION_CHANGE	GOBP_DNA_CONFORMATION_CHANGE	23/332	246/15048	5.72598e-09	2.11943e-06	1.92789e-06	EZH2/SMC2/CHAF1A/RFC4/NCAPD2/ASF1B/RAD54L/CHAF1B/OIP5/RAD54B/RFC5/DNAJC9/BLM/HJURP/CENPP/RECQL4/SMC4/MCM6/TRIM28/CDK2/G3BP1/TOP2A/MBD3	23	Unknown Up (460)	Unknown Up (460)
GOBP_MITOTIC_SPINDLE_ORGANIZATION	GOBP_MITOTIC_SPINDLE_ORGANIZATION	15/332	109/15048	1.62523e-08	5.26371e-06	4.78801e-06	PSRC1/CENPH/KIF4A/NUF2/KIFC1/SPC25/TACC3/BCCIP/TTK/CCNB1/DLGAP5/KPNB1/GPSM2/NUP62/RAE1	15	Unknown Up (460)	Unknown Up (460)
GOBP_SPINDLE_ORGANIZATION	GOBP_SPINDLE_ORGANIZATION	18/332	165/15048	2.51678e-08	6.54239e-06	5.95113e-06	PSRC1/CENPH/KIF4A/NUF2/KIFC1/SPAG5/SPC25/TACC3/BCCIP/ASPM/TTK/CCNB1/SAC3D1/DLGAP5/KPNB1/GPSM2/NUP62/RAE1	18	Unknown Up (460)	Unknown Up (460)
GOBP_NCRNA_METABOLIC_PROCESS	GOBP_NCRNA_METABOLIC_PROCESS	30/332	429/15048	2.52504e-08	6.54239e-06	5.95113e-06	MRTO4/EXOSC9/KHSRP/NOP56/DKC1/DARS2/MRPL1/DDX56/GTPBP4/RPS7/POP5/RPF2/TPRKB/NSUN2/EXOSC10/GTF3C5/RPP40/GATC/PUS1/FARSA/FRG1/CLP1/ERI1/CDK5RAP1/WDR74/RPF1/PRKDC/HRAS/GTF2H5/NOP14	30	Unknown Up (460)	Unknown Up (460)
GOBP_RIBOSOME_BIOGENESIS	GOBP_RIBOSOME_BIOGENESIS	22/332	262/15048	8.58885e-08	2.02307e-05	1.84023e-05	MRTO4/EXOSC9/NOP56/MRPL20/DKC1/MRPL1/MRPS7/DDX56/GTPBP4/RPS7/POP5/RPF2/EXOSC10/RPP40/FRG1/ERI1/WDR74/TSC1/RPF1/PRKDC/GTF2H5/NOP14	22	Unknown Up (460)	Unknown Up (460)
GOBP_MEIOTIC_CELL_CYCLE	GOBP_MEIOTIC_CELL_CYCLE	20/332	222/15048	1.06911e-07	2.30838e-05	2.09976e-05	EXO1/SMC2/NCAPD2/RMI1/RAD54L/CDC25C/RAD51AP1/NUF2/RAD54B/EME1/ASPM/TTK/SMC4/MNS1/CDK2/NSUN2/ING2/TOP2A/CDC25B/MSH5	20	Unknown Up (460)	Unknown Up (460)
GOBP_RRNA_METABOLIC_PROCESS	GOBP_RRNA_METABOLIC_PROCESS	20/332	224/15048	1.23901e-07	2.46945e-05	2.24627e-05	MRTO4/EXOSC9/NOP56/DKC1/MRPL1/DDX56/GTPBP4/RPS7/POP5/RPF2/EXOSC10/GTF3C5/RPP40/FRG1/ERI1/WDR74/RPF1/PRKDC/GTF2H5/NOP14	20	Unknown Up (460)	Unknown Up (460)
GOBP_NCRNA_PROCESSING	GOBP_NCRNA_PROCESSING	24/332	320/15048	1.85223e-07	3.21966e-05	2.92869e-05	MRTO4/EXOSC9/NOP56/DKC1/MRPL1/DDX56/GTPBP4/RPS7/POP5/RPF2/TPRKB/NSUN2/EXOSC10/RPP40/PUS1/FRG1/CLP1/ERI1/CDK5RAP1/WDR74/RPF1/PRKDC/GTF2H5/NOP14	24	Unknown Up (460)	Unknown Up (460)
GOBP_MEIOTIC_CELL_CYCLE_PROCESS	GOBP_MEIOTIC_CELL_CYCLE_PROCESS	17/332	168/15048	1.86395e-07	3.21966e-05	2.92869e-05	SMC2/NCAPD2/RMI1/RAD54L/CDC25C/RAD51AP1/NUF2/RAD54B/EME1/ASPM/TTK/SMC4/NSUN2/ING2/TOP2A/CDC25B/MSH5	17	Unknown Up (460)	Unknown Up (460)
GOBP_MITOTIC_SISTER_CHROMATID_SEGREGATION	GOBP_MITOTIC_SISTER_CHROMATID_SEGREGATION	16/332	151/15048	2.27782e-07	3.68864e-05	3.35529e-05	SMC2/NCAPD2/PSRC1/KIF4A/NUF2/KIFC1/KIF14/SPAG5/TACC3/TTK/CCNB1/SMC4/DLGAP5/KPNB1/NUP62/ANAPC7	16	Unknown Up (460)	Unknown Up (460)
GOBP_MICROTUBULE_CYTOSKELETON_ORGANIZATION_INVOLVED_IN_MITOSIS	GOBP_MICROTUBULE_CYTOSKELETON_ORGANIZATION_INVOLVED_IN_MITOSIS	15/332	134/15048	2.66009e-07	4.05429e-05	3.68789e-05	PSRC1/CENPH/KIF4A/NUF2/KIFC1/SPC25/TACC3/BCCIP/TTK/CCNB1/DLGAP5/KPNB1/GPSM2/NUP62/RAE1	15	Unknown Up (460)	Unknown Up (460)
GOBP_MORPHOGENESIS_OF_AN_EPITHELIUM	GOBP_MORPHOGENESIS_OF_AN_EPITHELIUM	41/483	496/15048	2.87741e-08	4.44119e-05	3.84903e-05	PDGFA/FGF1/NTN4/FOXC2/HHIP/ANKRD6/ID4/MICAL2/TFAP2A/CLASP2/JAG1/DLC1/SOX11/FOXD1/EDN1/FOXE1/DACT1/HIF1A/ARHGAP24/PLXND1/FEM1B/MSN/PKD2/MEF2C/SHROOM3/SNAI2/PODXL/STAT1/RARA/COL5A1/HBEGF/FAT1/COL4A1/FZD2/CITED2/EGF/VEGFC/RHOB/GPC4/EPHA2/SPINT2	41	CAF2 Up (679)	CAF2 Up (679)
GOBP_CELL_ADHESION_MEDIATED_BY_INTEGRIN	GOBP_CELL_ADHESION_MEDIATED_BY_INTEGRIN	15/483	81/15048	3.70099e-08	4.44119e-05	3.84903e-05	FOXC2/ITGA11/PTK2/ITGA7/FBN1/SERPINE1/SNAI2/PODXL/ITGA3/ADA/ITGA10/ITGB5/EPHA2/ITGBL1/ITGA8	15	CAF2 Up (679)	CAF2 Up (679)
GOBP_MITOTIC_NUCLEAR_DIVISION	GOBP_MITOTIC_NUCLEAR_DIVISION	21/332	261/15048	3.47573e-07	4.97001e-05	4.52085e-05	SMC2/NCAPD2/MKI67/PSRC1/KIF4A/CDC25C/NUF2/KIFC1/KIF14/SPAG5/PRMT5/TACC3/KIF20B/BCCIP/TTK/CCNB1/SMC4/DLGAP5/KPNB1/NUP62/ANAPC7	21	Unknown Up (460)	Unknown Up (460)
GOBP_RNA_LOCALIZATION	GOBP_RNA_LOCALIZATION	17/332	176/15048	3.64455e-07	4.97001e-05	4.52085e-05	KHSRP/DKC1/NUP37/NUP188/NUP54/CCT3/KPNB1/NSUN2/EXOSC10/NUP62/YBX1/RAE1/NUP98/TSC1/THOC7/SENP2/CPSF6	17	Unknown Up (460)	Unknown Up (460)
GOBP_SISTER_CHROMATID_SEGREGATION	GOBP_SISTER_CHROMATID_SEGREGATION	17/332	178/15048	4.28312e-07	5.54879e-05	5.04732e-05	SMC2/NCAPD2/PSRC1/KIF4A/NUF2/KIFC1/KIF14/SPAG5/TACC3/TTK/CCNB1/SMC4/DLGAP5/KPNB1/NUP62/TOP2A/ANAPC7	17	Unknown Up (460)	Unknown Up (460)
GOBP_HEART_MORPHOGENESIS	GOBP_HEART_MORPHOGENESIS	26/483	242/15048	7.16199e-08	6.44579e-05	5.58635e-05	HEYL/FOXC2/DSP/MICAL2/ANKRD1/JAG1/ELN/DLC1/SOX11/PTK2/EDN1/SMARCD3/HIF1A/CPE/SMAD7/PPP1R13L/HEY2/PLXND1/PKD2/MEF2C/SNAI2/TPM1/COL5A1/FZD2/CITED2/SLIT3	26	CAF2 Up (679)	CAF2 Up (679)
GOBP_MESENCHYMAL_CELL_DEVELOPMENT	GOBP_MESENCHYMAL_CELL_DEVELOPMENT	15/483	89/15048	1.37001e-07	8.87522e-05	7.69185e-05	HEYL/FOXC2/SEMA5B/JAG1/SOX11/FN1/EDN1/HIF1A/HEY2/SEMA5A/SNAI2/CORO1C/ANXA6/CITED2/SEMA6A	15	CAF2 Up (679)	CAF2 Up (679)
GOBP_INTEGRIN_MEDIATED_SIGNALING_PATHWAY	GOBP_INTEGRIN_MEDIATED_SIGNALING_PATHWAY	16/483	102/15048	1.4792e-07	8.87522e-05	7.69185e-05	FN1/ITGA11/BCAR1/PTK2/ITGA7/NEDD9/MYH9/LOXL3/ITGA3/ITGA10/LIMS2/ITGB5/TLN1/ITGBL1/ITGA8/LIMS1	16	CAF2 Up (679)	CAF2 Up (679)
GOBP_GLAND_DEVELOPMENT	GOBP_GLAND_DEVELOPMENT	28/303	422/15048	3.26843e-08	0.000102825	8.38783e-05	SFRP1/MDK/HMOX1/ACAT1/ALDH1A3/SMAD3/TGFBR3/TAF10/FOXF1/GATA2/LY6E/SOD2/HGF/SIX4/HOXA13/TGFBR2/TCF21/HOXA5/MET/ISL1/NRP1/NKX3-1/SERPINF1/ASS1/FASN/TBX3/SOCS2/SEMA3A	28	NAF Up (396)	NAF Up (396)
GOBP_DNA_DEPENDENT_DNA_REPLICATION	GOBP_DNA_DEPENDENT_DNA_REPLICATION	14/332	131/15048	1.17752e-06	0.000145284	0.000132154	RFC4/POLA2/TIMELESS/POLD1/RRM1/RFC5/RFWD3/BLM/GMNN/EME1/RECQL4/MCM6/CDK2/SENP2	14	Unknown Up (460)	Unknown Up (460)
GOBP_AMEBOIDAL_TYPE_CELL_MIGRATION	GOBP_AMEBOIDAL_TYPE_CELL_MIGRATION	36/483	447/15048	3.92514e-07	0.000184925	0.000160268	DAAM2/FGF1/FOXC2/SYDE1/KIT/SEMA5B/CLASP2/THBS1/DOCK5/FN1/BCAR1/PTK2/EDN1/HIF1A/ZEB2/SASH1/SEMA5A/PLXND1/ETS1/CDH13/MYH9/MEF2C/LGMN/RHOJ/STAT1/ARHGDIB/CORO1C/HBEGF/ANXA6/ITGA3/EGF/VEGFC/SEMA6A/RHOB/EPHA2/SCG2	36	CAF2 Up (679)	CAF2 Up (679)
GOBP_CARDIAC_VENTRICLE_MORPHOGENESIS	GOBP_CARDIAC_VENTRICLE_MORPHOGENESIS	13/483	72/15048	4.10944e-07	0.000184925	0.000160268	HEYL/FOXC2/DSP/JAG1/SOX11/SMARCD3/HIF1A/CPE/SMAD7/PPP1R13L/HEY2/MEF2C/TPM1	13	CAF2 Up (679)	CAF2 Up (679)
GOBP_TISSUE_MIGRATION	GOBP_TISSUE_MIGRATION	30/483	340/15048	5.63896e-07	0.000222269	0.000192634	DAAM2/FGF1/FOXC2/KIT/CLASP2/THBS1/DOCK5/BCAR1/PTK2/EDN1/HIF1A/ZEB2/SASH1/SEMA5A/PLXND1/ETS1/CDH13/MYH9/MEF2C/LGMN/RHOJ/STAT1/CORO1C/HBEGF/ITGA3/EGF/VEGFC/RHOB/EPHA2/SCG2	30	CAF2 Up (679)	CAF2 Up (679)
GOBP_RESPONSE_TO_TRANSFORMING_GROWTH_FACTOR_BETA	GOBP_RESPONSE_TO_TRANSFORMING_GROWTH_FACTOR_BETA	25/483	253/15048	6.33052e-07	0.000222269	0.000192634	PDGFA/PDE3A/ZFHX3/ANKRD1/THBS1/LRRC32/SOX11/PTK2/EDN1/PMEPA1/ZEB2/SMAD7/CLEC3B/COL4A2/FBN1/MEF2C/ITGA3/CITED2/CAV2/ITGB5/SNX25/FYN/HTRA1/ITGA8/LIMS1	25	CAF2 Up (679)	CAF2 Up (679)
GOBP_CELL_SUBSTRATE_ADHESION	GOBP_CELL_SUBSTRATE_ADHESION	30/483	343/15048	6.79157e-07	0.000222269	0.000192634	EPHB1/COL5A3/NTN4/CLASP2/JAG1/DLC1/THBS1/DOCK5/FN1/ITGA11/PTK2/AXL/ITGA7/NEDD9/CDH13/SERPINE1/PTPRO/ACTN4/CORO1C/ITGA3/COL8A1/EDIL3/ITGA10/LIMS2/ITGB5/ECM2/ITGBL1/CD36/ITGA8/LIMS1	30	CAF2 Up (679)	CAF2 Up (679)
GOBP_DNA_PACKAGING	GOBP_DNA_PACKAGING	15/332	156/15048	1.89081e-06	0.000222686	0.000202561	EZH2/SMC2/CHAF1A/NCAPD2/ASF1B/CHAF1B/OIP5/DNAJC9/HJURP/CENPP/SMC4/TRIM28/CDK2/TOP2A/MBD3	15	Unknown Up (460)	Unknown Up (460)
GOBP_REGULATION_OF_DNA_METABOLIC_PROCESS	GOBP_REGULATION_OF_DNA_METABOLIC_PROCESS	23/332	343/15048	2.33643e-06	0.000263204	0.000239417	UCHL5/RFC4/MSH2/TIMELESS/RAD51AP1/RFC5/PRMT5/BLM/DEK/HNRNPD/DKC1/GMNN/PTGES3/HSP90AB1/CCT3/TRIM28/CDK2/EYA3/EXOSC10/MBD3/OTUB1/DNAJC2/PRKDC	23	Unknown Up (460)	Unknown Up (460)
GOBP_DNA_RECOMBINATION	GOBP_DNA_RECOMBINATION	19/332	250/15048	2.96433e-06	0.000320025	0.000291103	EXO1/UCHL5/MSH2/RMI1/RAD54L/TIMELESS/RAD51AP1/RAD54B/RFWD3/BLM/EME1/RECQL4/MCM6/RPA3/TPRKB/PSMD14/TOP2A/MSH5/PRKDC	19	Unknown Up (460)	Unknown Up (460)
GOBP_ESTABLISHMENT_OF_RNA_LOCALIZATION	GOBP_ESTABLISHMENT_OF_RNA_LOCALIZATION	14/332	142/15048	3.10095e-06	0.000321382	0.000292338	KHSRP/NUP37/NUP188/NUP54/KPNB1/NSUN2/NUP62/YBX1/RAE1/NUP98/TSC1/THOC7/SENP2/CPSF6	14	Unknown Up (460)	Unknown Up (460)
GOBP_CHROMOSOME_LOCALIZATION	GOBP_CHROMOSOME_LOCALIZATION	10/332	71/15048	3.34113e-06	0.000332957	0.000302866	PSRC1/NUF2/KIFC1/KIF14/SPAG5/CCNB1/DLGAP5/KPNB1/NUP62/CENPQ	10	Unknown Up (460)	Unknown Up (460)
GOBP_TELOMERE_ORGANIZATION	GOBP_TELOMERE_ORGANIZATION	13/332	124/15048	3.52658e-06	0.000338421	0.000307836	EXO1/EZH2/BLM/HNRNPD/DKC1/RECQL4/RPA3/PTGES3/HSP90AB1/CCT3/TPRKB/EXOSC10/PRKDC	13	Unknown Up (460)	Unknown Up (460)
GOBP_METAPHASE_PLATE_CONGRESSION	GOBP_METAPHASE_PLATE_CONGRESSION	9/332	58/15048	4.5699e-06	0.000422879	0.000384662	PSRC1/NUF2/KIFC1/KIF14/SPAG5/CCNB1/KPNB1/NUP62/CENPQ	9	Unknown Up (460)	Unknown Up (460)
GOBP_REGULATION_OF_MITOTIC_CELL_CYCLE	GOBP_REGULATION_OF_MITOTIC_CELL_CYCLE	26/332	438/15048	4.84757e-06	0.000425081	0.000386665	EZH2/MKI67/MSH2/CDC25C/KIF14/RRM1/RFWD3/CKS1B/PRMT5/BLM/KIF20B/GMNN/EME1/TTK/CCNB1/RPA3/DTL/DLGAP5/CDK2/EIF4E/NUP62/TTLL12/CDC25B/ANAPC7/PRKDC/SENP2	26	Unknown Up (460)	Unknown Up (460)
GOBP_REGULATION_OF_CHROMOSOME_ORGANIZATION	GOBP_REGULATION_OF_CHROMOSOME_ORGANIZATION	16/332	190/15048	4.92181e-06	0.000425081	0.000386665	UCHL5/SMC2/NCAPD2/TACC3/HNRNPD/DKC1/TTK/CCNB1/SMC4/DLGAP5/CCT3/TRIM28/CDK2/EXOSC10/TOP2A/ANAPC7	16	Unknown Up (460)	Unknown Up (460)
GOBP_CARDIAC_VENTRICLE_DEVELOPMENT	GOBP_CARDIAC_VENTRICLE_DEVELOPMENT	16/483	120/15048	1.4235e-06	0.00042705	0.00037011	HEYL/FOXC2/DSP/JAG1/SOX11/SMARCD3/HIF1A/CPE/SMAD7/PPP1R13L/HEY2/MEF2C/TPM1/FZD2/CITED2/SLIT3	16	CAF2 Up (679)	CAF2 Up (679)
GOBP_UROGENITAL_SYSTEM_DEVELOPMENT	GOBP_UROGENITAL_SYSTEM_DEVELOPMENT	29/483	340/15048	1.73773e-06	0.000457696	0.00039667	HEYL/PDGFA/CRIP1/FGF1/FOXC2/MYO1E/ID4/TFAP2A/JAG1/NOTCH3/SOX11/FOXD1/SMAD7/PLXND1/FBN1/FEM1B/PKD2/FADD/MEF2C/PODXL/PTPRO/STAT1/RARA/TIPARP/COL4A1/ITGA3/PDGFRB/AGTR1/ITGA8	29	CAF2 Up (679)	CAF2 Up (679)
GOBP_CARDIAC_CHAMBER_MORPHOGENESIS	GOBP_CARDIAC_CHAMBER_MORPHOGENESIS	16/483	122/15048	1.77993e-06	0.000457696	0.00039667	HEYL/FOXC2/DSP/JAG1/SOX11/SMARCD3/HIF1A/CPE/SMAD7/PPP1R13L/HEY2/MEF2C/TPM1/FZD2/CITED2/SLIT3	16	CAF2 Up (679)	CAF2 Up (679)
GOBP_DOUBLE_STRAND_BREAK_REPAIR	GOBP_DOUBLE_STRAND_BREAK_REPAIR	17/332	214/15048	5.48377e-06	0.000458337	0.000416915	MSH2/RMI1/RAD54L/TIMELESS/RAD51AP1/RAD54B/RFWD3/BLM/DEK/EME1/RECQL4/MCM6/RPA3/EYA3/PSMD14/OTUB1/PRKDC	17	Unknown Up (460)	Unknown Up (460)
GOBP_POSITIVE_REGULATION_OF_ORGANELLE_ORGANIZATION	GOBP_POSITIVE_REGULATION_OF_ORGANELLE_ORGANIZATION	26/332	442/15048	5.70736e-06	0.000462117	0.000420354	SMC2/NCAPD2/PSRC1/PLK4/RAD51AP1/SPAG5/HNRNPD/DKC1/SMC4/DLGAP5/CCT3/SLC25A5/GPSM2/MNS1/TRIM28/PDCD5/CDK2/G3BP1/NUP62/WIPI1/TSC1/ANAPC7/HRAS/DSTN/HTRA2/CTTN	26	Unknown Up (460)	Unknown Up (460)
GOBP_MATURATION_OF_5_8S_RRNA	GOBP_MATURATION_OF_5_8S_RRNA	7/332	33/15048	6.22832e-06	0.000489017	0.000444823	EXOSC9/EXOSC10/RPP40/ERI1/RPF1/PRKDC/NOP14	7	Unknown Up (460)	Unknown Up (460)
GOBP_NEURAL_CREST_CELL_DIFFERENTIATION	GOBP_NEURAL_CREST_CELL_DIFFERENTIATION	14/483	96/15048	2.1925e-06	0.0005262	0.00045604	FOXC2/SEMA5B/JAG1/SOX11/FN1/EDN1/HIF1A/SEMA5A/MEF2C/SNAI2/CORO1C/ANXA6/CITED2/SEMA6A	14	CAF2 Up (679)	CAF2 Up (679)
GOBP_REGULATION_OF_CELL_SHAPE	GOBP_REGULATION_OF_CELL_SHAPE	17/483	140/15048	2.51556e-06	0.00054074	0.000468641	KIT/DLC1/FGD4/FN1/PTK2/ITGA7/EPS8/PLXND1/MYH9/MSN/SHROOM3/RHOJ/TPM1/ATP10A/SH3KBP1/RHOB/FYN	17	CAF2 Up (679)	CAF2 Up (679)
GOBP_ADP_METABOLIC_PROCESS	GOBP_ADP_METABOLIC_PROCESS	13/483	84/15048	2.55349e-06	0.00054074	0.000468641	LDHA/HIF1A/ENO1/TPI1/ENO2/PGAM1/AK5/PFKP/PGK1/PRKAG2/SLC2A6/HK2/PGAM4	13	CAF2 Up (679)	CAF2 Up (679)
GOBP_MULTI_MULTICELLULAR_ORGANISM_PROCESS	GOBP_MULTI_MULTICELLULAR_ORGANISM_PROCESS	13/159	203/15048	2.39249e-07	0.000594296	0.000494365	RGS2/FBLN1/PSG5/TGFBR2/CTSB/ADM/PRDM1/PSG6/ITGA2/PSG1/PSG3/PSG9/PSG4	13	CAF1 Up (191)	CAF1 Up (191)
GOBP_CARDIAC_CHAMBER_DEVELOPMENT	GOBP_CARDIAC_CHAMBER_DEVELOPMENT	11/159	158/15048	9.16565e-07	0.000614803	0.000511424	LMO4/DHRS3/SOX4/HEG1/WNT2/BMP4/TGFBR2/PRDM1/PTK7/FOXF1/SEMA3C	11	CAF1 Up (191)	CAF1 Up (191)
GOBP_RESPIRATORY_SYSTEM_DEVELOPMENT	GOBP_RESPIRATORY_SYSTEM_DEVELOPMENT	12/159	192/15048	9.16639e-07	0.000614803	0.000511424	RDH10/HEG1/ASS1/WNT2/FGF2/BMP4/TGFBR2/PDPN/FGF7/ALDH1A3/PTK7/FOXF1	12	CAF1 Up (191)	CAF1 Up (191)
GOBP_CARDIAC_SEPTUM_DEVELOPMENT	GOBP_CARDIAC_SEPTUM_DEVELOPMENT	9/159	99/15048	1.00598e-06	0.000614803	0.000511424	LMO4/DHRS3/SOX4/HEG1/BMP4/TGFBR2/PRDM1/PTK7/SEMA3C	9	CAF1 Up (191)	CAF1 Up (191)
GOBP_MORPHOGENESIS_OF_AN_EPITHELIUM	GOBP_MORPHOGENESIS_OF_AN_EPITHELIUM	19/159	496/15048	1.23753e-06	0.000614803	0.000511424	LMO4/RDH10/TGM2/SOX4/PRICKLE2/WNT2/PRICKLE1/FGF2/BMP4/TGFBR2/ACVRL1/ADM/PDPN/FGF7/ALDH1A3/PTK7/FOXF1/FLRT3/SEMA3C	19	CAF1 Up (191)	CAF1 Up (191)
GOBP_MESENCHYME_DEVELOPMENT	GOBP_MESENCHYME_DEVELOPMENT	21/303	288/15048	3.92869e-07	0.000617983	0.000504113	SFRP1/MDK/EPHA4/SMAD3/TGFBR3/FOXF1/BNC2/HGF/KITLG/SIX4/SEMA3B/SEMA4B/TGFBR2/TCF21/HOXA5/ISL1/NRP1/OSR1/TBX3/SEMA3A/HTR2B	21	NAF Up (396)	NAF Up (396)
GOBP_MUSCLE_TISSUE_DEVELOPMENT	GOBP_MUSCLE_TISSUE_DEVELOPMENT	30/483	374/15048	4.0386e-06	0.000807721	0.000700024	HEYL/EPHB1/FOXC2/DSP/VGLL4/ANKRD1/ELN/SOX11/EDN1/ITGA7/HMG20B/SMAD7/PPP1R13L/HEY2/PDLIM5/SORBS2/RGS4/MYH11/PKD2/MEF2C/MYOZ1/RARA/TIPARP/TPM1/MEF2D/CITED2/CSRP2/CAV2/PDGFRB/ITGA8	30	CAF2 Up (679)	CAF2 Up (679)
GOBP_RESPONSE_TO_OXYGEN_LEVELS	GOBP_RESPONSE_TO_OXYGEN_LEVELS	26/483	300/15048	4.47769e-06	0.000848404	0.000735283	PDGFA/KCNMB1/CRYAB/THBS1/SLC29A1/EDN1/BNIP3/HIF1A/ENDOG/ENO1/FMN2/STC2/PLOD1/ACTN4/PDK3/OXTR/CITED2/PGK1/PDGFRB/ADA/DDAH1/ANGPTL4/VEGFC/SLC2A1/ATP1B1/HK2	26	CAF2 Up (679)	CAF2 Up (679)
GOBP_REGULATION_OF_CELL_MORPHOGENESIS	GOBP_REGULATION_OF_CELL_MORPHOGENESIS	25/483	283/15048	4.87926e-06	0.000878267	0.000761164	ACTR2/KIT/DLC1/FGD4/DOCK5/FN1/PTK2/OSTN/ITGA7/NEDD9/EPS8/PLXND1/MYH9/MSN/SHROOM3/RHOJ/ACTN4/CORO1C/TPM1/ATP10A/SH3KBP1/LIMS2/RHOB/FYN/LIMS1	25	CAF2 Up (679)	CAF2 Up (679)
GOBP_POSITIVE_REGULATION_OF_EPITHELIAL_CELL_MIGRATION	GOBP_POSITIVE_REGULATION_OF_EPITHELIAL_CELL_MIGRATION	18/483	164/15048	5.50337e-06	0.000943436	0.000817644	FGF1/FOXC2/CLASP2/THBS1/DOCK5/BCAR1/EDN1/HIF1A/SASH1/SEMA5A/ETS1/LGMN/RHOJ/HBEGF/ITGA3/EGF/VEGFC/RHOB	18	CAF2 Up (679)	CAF2 Up (679)
GOBP_TELOMERE_MAINTENANCE	GOBP_TELOMERE_MAINTENANCE	12/332	120/15048	1.36255e-05	0.00103834	0.000944504	EXO1/BLM/HNRNPD/DKC1/RECQL4/RPA3/PTGES3/HSP90AB1/CCT3/TPRKB/EXOSC10/PRKDC	12	Unknown Up (460)	Unknown Up (460)
GOBP_OUTFLOW_TRACT_MORPHOGENESIS	GOBP_OUTFLOW_TRACT_MORPHOGENESIS	12/483	78/15048	6.6089e-06	0.00103976	0.000901126	HEYL/FOXC2/JAG1/ELN/SOX11/EDN1/HIF1A/HEY2/PLXND1/MEF2C/FZD2/CITED2	12	CAF2 Up (679)	CAF2 Up (679)
GOBP_MESENCHYME_DEVELOPMENT	GOBP_MESENCHYME_DEVELOPMENT	25/483	288/15048	6.64292e-06	0.00103976	0.000901126	HEYL/FOXC2/SEMA5B/CLASP2/JAG1/MARK1/SOX11/FN1/FOXD1/EDN1/HIF1A/SMAD7/HEY2/SEMA5A/PKD2/MEF2C/LOXL3/SNAI2/STAT1/CORO1C/ANXA6/CITED2/PDGFRB/SEMA6A/LIMS1	25	CAF2 Up (679)	CAF2 Up (679)
GOBP_NUCLEOTIDE_PHOSPHORYLATION	GOBP_NUCLEOTIDE_PHOSPHORYLATION	13/483	92/15048	7.21253e-06	0.00108188	0.000937629	LDHA/HIF1A/ENO1/TPI1/ENO2/PGAM1/AK5/PFKP/PGK1/PRKAG2/SLC2A6/HK2/PGAM4	13	CAF2 Up (679)	CAF2 Up (679)
GOBP_REGULATION_OF_CELL_SUBSTRATE_ADHESION	GOBP_REGULATION_OF_CELL_SUBSTRATE_ADHESION	20/483	201/15048	7.55038e-06	0.00108725	0.000942287	CLASP2/JAG1/DLC1/THBS1/DOCK5/FN1/PTK2/NEDD9/CDH13/SERPINE1/PTPRO/ACTN4/CORO1C/ITGA3/COL8A1/EDIL3/LIMS2/ECM2/CD36/LIMS1	20	CAF2 Up (679)	CAF2 Up (679)
GOBP_POSITIVE_REGULATION_OF_CELL_CYCLE	GOBP_POSITIVE_REGULATION_OF_CELL_CYCLE	20/332	306/15048	1.56518e-05	0.00112803	0.00102609	EZH2/NUPR1/PSRC1/PLK4/CDC25C/RAD51AP1/KIF14/RRM1/SPAG5/CKS1B/KIF20B/CCNB1/DTL/DLGAP5/GPSM2/EIF4E/FOSL1/NUP62/CDC25B/ANAPC7	20	Unknown Up (460)	Unknown Up (460)
GOBP_CHROMATIN_ASSEMBLY_OR_DISASSEMBLY	GOBP_CHROMATIN_ASSEMBLY_OR_DISASSEMBLY	13/332	142/15048	1.56731e-05	0.00112803	0.00102609	EZH2/CHAF1A/ASF1B/CHAF1B/OIP5/SUPT16H/DNAJC9/HJURP/CENPP/TRIM28/CDK2/SSRP1/MBD3	13	Unknown Up (460)	Unknown Up (460)
GOBP_MESENCHYMAL_CELL_DIFFERENTIATION	GOBP_MESENCHYMAL_CELL_DIFFERENTIATION	22/483	237/15048	8.23781e-06	0.00113065	0.000979895	HEYL/FOXC2/SEMA5B/CLASP2/JAG1/MARK1/SOX11/FN1/EDN1/HIF1A/SMAD7/HEY2/SEMA5A/MEF2C/LOXL3/SNAI2/STAT1/CORO1C/ANXA6/CITED2/SEMA6A/LIMS1	22	CAF2 Up (679)	CAF2 Up (679)
GOBP_ACTIN_FILAMENT_BUNDLE_ORGANIZATION	GOBP_ACTIN_FILAMENT_BUNDLE_ORGANIZATION	17/483	153/15048	8.47986e-06	0.00113065	0.000979895	MYO1B/CLASP2/ELN/DLC1/PLS3/FHOD1/FMN2/NEDD9/EPS8/AIF1L/PDXP/TPM1/SYNPO2/CALD1/ITGB5/SPIRE1/STMN1	17	CAF2 Up (679)	CAF2 Up (679)
GOBP_REGULATION_OF_CELL_DEVELOPMENT	GOBP_REGULATION_OF_CELL_DEVELOPMENT	34/483	470/15048	8.86546e-06	0.00113984	0.000987865	HEYL/DAAM2/PDE3A/TRIM32/CDK5R1/YWHAH/NGF/ACTR2/KIT/ID4/SEMA5B/PRKCH/MAP2K1/DOCK5/SOX11/FN1/SMARCD3/HIF1A/SMAD7/HEY2/NEDD9/SEMA5A/DOCK7/PLXND1/FBN1/SPEN/NTRK2/ACTN4/CORO1C/SPP1/LIMS2/VEGFC/SEMA6A/LIMS1	34	CAF2 Up (679)	CAF2 Up (679)
GOBP_TRNA_METABOLIC_PROCESS	GOBP_TRNA_METABOLIC_PROCESS	13/332	143/15048	1.69035e-05	0.0011837	0.00107672	EXOSC9/DARS2/POP5/TPRKB/NSUN2/EXOSC10/GTF3C5/RPP40/GATC/PUS1/FARSA/CLP1/CDK5RAP1	13	Unknown Up (460)	Unknown Up (460)
GOBP_DNA_REPLICATION_INDEPENDENT_CHROMATIN_ORGANIZATION	GOBP_DNA_REPLICATION_INDEPENDENT_CHROMATIN_ORGANIZATION	5/332	16/15048	1.81387e-05	0.00122389	0.00111328	ASF1B/OIP5/SUPT16H/HJURP/CENPP	5	Unknown Up (460)	Unknown Up (460)
GOBP_MRNA_PROCESSING	GOBP_MRNA_PROCESSING	23/332	389/15048	1.84221e-05	0.00122389	0.00111328	PRPF4/KHSRP/PRMT5/RBM14/BARD1/CSTF2/RBMX/SNRNP70/DHX15/GEMIN5/HNRNPM/LSM4/YBX1/FRG1/CLP1/NUP98/THOC7/SNRPB2/PPIL1/MAGOH/RAVER1/PQBP1/CPSF6	23	Unknown Up (460)	Unknown Up (460)
GOBP_PROTEIN_DNA_COMPLEX_SUBUNIT_ORGANIZATION	GOBP_PROTEIN_DNA_COMPLEX_SUBUNIT_ORGANIZATION	14/332	166/15048	1.89342e-05	0.00122647	0.00111563	UCHL5/CHAF1A/ASF1B/CENPH/CHAF1B/OIP5/SUPT16H/DNAJC9/HJURP/GMNN/CENPP/DLGAP5/SSRP1/GTF2H5	14	Unknown Up (460)	Unknown Up (460)
GOBP_EXTERNAL_ENCAPSULATING_STRUCTURE_ORGANIZATION	GOBP_EXTERNAL_ENCAPSULATING_STRUCTURE_ORGANIZATION	25/483	295/15048	1.00927e-05	0.00125289	0.00108584	COL5A3/NTN4/FOXC2/MYO1E/ADAMTS7/CLASP2/ELN/MMP11/COL22A1/COL4A2/OLFML2B/MYH11/LOXL3/COL18A1/TGM1/COL5A1/COL4A1/COL8A1/CAV2/P4HA1/ECM2/COL5A2/SPINT2/ITGA8/COL4A5	25	CAF2 Up (679)	CAF2 Up (679)
GOBP_NON_MEMBRANE_BOUNDED_ORGANELLE_ASSEMBLY	GOBP_NON_MEMBRANE_BOUNDED_ORGANELLE_ASSEMBLY	21/332	339/15048	2.15092e-05	0.00135928	0.00123644	MRTO4/CENPH/KIF4A/PLK4/KIFC1/SPAG5/RBM14/MRPL20/BCCIP/ASPM/MRPS7/SAC3D1/DLGAP5/KPNB1/GPSM2/RPF2/CDK2/G3BP1/NUP62/LSM4/PRKDC	21	Unknown Up (460)	Unknown Up (460)
GOBP_CELL_SUBSTRATE_ADHESION	GOBP_CELL_SUBSTRATE_ADHESION	15/159	343/15048	3.58284e-06	0.0014833	0.00123388	FBLN5/TYRO3/CASK/FBLN1/LIMCH1/ACVRL1/APOD/LAMB1/GAS6/PDPN/ITGA2/ANTXR1/FOXF1/PTPRK/VTN	15	CAF1 Up (191)	CAF1 Up (191)
GOBP_CORONARY_VASCULATURE_DEVELOPMENT	GOBP_CORONARY_VASCULATURE_DEVELOPMENT	6/159	42/15048	4.84959e-06	0.00156249	0.00129976	PRICKLE1/FGF2/BMP4/PRDM1/PTK7/SGCD	6	CAF1 Up (191)	CAF1 Up (191)
GOBP_CARDIAC_VENTRICLE_DEVELOPMENT	GOBP_CARDIAC_VENTRICLE_DEVELOPMENT	9/159	120/15048	5.03217e-06	0.00156249	0.00129976	LMO4/SOX4/HEG1/BMP4/TGFBR2/PRDM1/PTK7/FOXF1/SEMA3C	9	CAF1 Up (191)	CAF1 Up (191)
GOBP_CARDIAC_CHAMBER_DEVELOPMENT	GOBP_CARDIAC_CHAMBER_DEVELOPMENT	17/483	158/15048	1.30294e-05	0.00156353	0.00135506	HEYL/FOXC2/DSP/JAG1/SOX11/SMARCD3/HIF1A/CPE/SMAD7/PPP1R13L/HEY2/PLXND1/MEF2C/TPM1/FZD2/CITED2/SLIT3	17	CAF2 Up (679)	CAF2 Up (679)
GOBP_WOUND_HEALING	GOBP_WOUND_HEALING	16/159	404/15048	5.95165e-06	0.00164265	0.00136644	SCARB1/AK3/TYRO3/CASK/FGF2/FBLN1/TGFBR2/IL6ST/ACVRL1/GAS6/PDPN/NFE2L2/ITGA2/F3/PTK7/VTN	16	CAF1 Up (191)	CAF1 Up (191)
GOBP_CHONDROITIN_SULFATE_BIOSYNTHETIC_PROCESS	GOBP_CHONDROITIN_SULFATE_BIOSYNTHETIC_PROCESS	6/483	18/15048	1.41641e-05	0.00164486	0.00142555	CHSY3/B3GALT6/CHST3/CHST7/UGDH/CHSY1	6	CAF2 Up (679)	CAF2 Up (679)
GOBP_VENTRICULAR_SEPTUM_DEVELOPMENT	GOBP_VENTRICULAR_SEPTUM_DEVELOPMENT	7/159	68/15048	7.27319e-06	0.00180666	0.00150287	LMO4/SOX4/HEG1/BMP4/TGFBR2/PRDM1/PTK7	7	CAF1 Up (191)	CAF1 Up (191)
GOBP_MORPHOGENESIS_OF_A_BRANCHING_STRUCTURE	GOBP_MORPHOGENESIS_OF_A_BRANCHING_STRUCTURE	11/159	198/15048	8.2206e-06	0.00185636	0.00154421	RDH10/TGM2/WNT2/FGF2/BMP4/TGFBR2/ADM/PRDM1/FGF7/FOXF1/SEMA3C	11	CAF1 Up (191)	CAF1 Up (191)
GOBP_NUCLEOBASE_CONTAINING_COMPOUND_TRANSPORT	GOBP_NUCLEOBASE_CONTAINING_COMPOUND_TRANSPORT	15/332	196/15048	3.03307e-05	0.00187112	0.00170202	KHSRP/NUP37/NUP188/NUP54/SLC25A5/KPNB1/NSUN2/NUP62/YBX1/RAE1/NUP98/TSC1/THOC7/SENP2/CPSF6	15	Unknown Up (460)	Unknown Up (460)
GOBP_REGULATION_OF_ACTIN_FILAMENT_BASED_PROCESS	GOBP_REGULATION_OF_ACTIN_FILAMENT_BASED_PROCESS	28/483	362/15048	1.66349e-05	0.00187143	0.00162191	PDGFA/DAAM2/NTF3/DSP/CDK5R1/CYFIP2/CLASP2/ESAM/ELN/DLC1/FHOD1/ARPC5/EDN1/RGS4/TMSB15A/SEMA5A/EPS8/MYH9/ARHGDIB/PDXP/TPM1/ARHGDIA/PLEKHG2/PDGFRB/SYNPO2/FCHSD2/RHOB/STMN1	28	CAF2 Up (679)	CAF2 Up (679)
GOBP_PYRUVATE_METABOLIC_PROCESS	GOBP_PYRUVATE_METABOLIC_PROCESS	13/483	100/15048	1.8189e-05	0.00193851	0.00168004	LDHA/HIF1A/ENO1/TPI1/PDK3/ENO2/PGAM1/PFKP/PGK1/PRKAG2/SLC2A6/HK2/PGAM4	13	CAF2 Up (679)	CAF2 Up (679)
GOBP_WOUND_HEALING	GOBP_WOUND_HEALING	30/483	404/15048	1.83082e-05	0.00193851	0.00168004	PDGFA/FGF1/FOXC2/DSP/DYSF/TLR4/CLASP2/ENTPD1/THBS1/CD59/PEAR1/FN1/PTK2/EDN1/AXL/HIF1A/MCAM/ARHGAP24/SERPINE1/MYH9/MYOZ1/SERPINB2/TPM1/COL5A1/HBEGF/ANXA6/PDGFRB/MYOF/TLN1/CD36	30	CAF2 Up (679)	CAF2 Up (679)
GOBP_KINETOCHORE_ORGANIZATION	GOBP_KINETOCHORE_ORGANIZATION	5/332	18/15048	3.43093e-05	0.00206734	0.0018805	SMC2/CENPH/NUF2/SMC4/DLGAP5	5	Unknown Up (460)	Unknown Up (460)
GOBP_NUCLEOSOME_ORGANIZATION	GOBP_NUCLEOSOME_ORGANIZATION	10/332	94/15048	4.17968e-05	0.00246126	0.00223883	UCHL5/CHAF1A/ASF1B/CHAF1B/OIP5/SUPT16H/DNAJC9/HJURP/CENPP/SSRP1	10	Unknown Up (460)	Unknown Up (460)
GOBP_REGULATION_OF_NERVOUS_SYSTEM_DEVELOPMENT	GOBP_REGULATION_OF_NERVOUS_SYSTEM_DEVELOPMENT	30/483	410/15048	2.42238e-05	0.00249159	0.00215938	HEYL/EPHB1/DAAM2/TRIM32/CDK5R1/YWHAH/NGF/ACTR2/KIT/ID4/SEMA5B/MTMR2/PRKCH/MAP2K1/SOX11/FN1/SMARCD3/HIF1A/HEY2/SEMA5A/DOCK7/PLXND1/SPEN/NTRK2/RARA/OXTR/IL1RAP/SPP1/VEGFC/SEMA6A	30	CAF2 Up (679)	CAF2 Up (679)
GOBP_LUNG_MORPHOGENESIS	GOBP_LUNG_MORPHOGENESIS	6/159	49/15048	1.21629e-05	0.00251772	0.00209437	RDH10/WNT2/BMP4/TGFBR2/FGF7/FOXF1	6	CAF1 Up (191)	CAF1 Up (191)
GOBP_NUCLEOSOME_ASSEMBLY	GOBP_NUCLEOSOME_ASSEMBLY	7/332	44/15048	4.53664e-05	0.0026121	0.00237603	CHAF1A/ASF1B/CHAF1B/OIP5/DNAJC9/HJURP/CENPP	7	Unknown Up (460)	Unknown Up (460)
GOBP_PROTEIN_DNA_COMPLEX_ASSEMBLY	GOBP_PROTEIN_DNA_COMPLEX_ASSEMBLY	11/332	115/15048	4.7102e-05	0.00265307	0.0024133	CHAF1A/ASF1B/CENPH/CHAF1B/OIP5/DNAJC9/HJURP/GMNN/CENPP/DLGAP5/GTF2H5	11	Unknown Up (460)	Unknown Up (460)
GOBP_MORPHOGENESIS_OF_A_BRANCHING_STRUCTURE	GOBP_MORPHOGENESIS_OF_A_BRANCHING_STRUCTURE	16/303	198/15048	2.60344e-06	0.00273014	0.00222708	SFRP1/MDK/FOXF1/SLIT2/HGF/SIX4/HOXA13/TGFBR2/TCF21/EYA1/HOXA5/MET/NRP1/NKX3-1/TBX3/SEMA3A	16	NAF Up (396)	NAF Up (396)
GOBP_ENDOTHELIAL_CELL_MIGRATION	GOBP_ENDOTHELIAL_CELL_MIGRATION	22/483	256/15048	2.76106e-05	0.00276106	0.00239292	FGF1/FOXC2/THBS1/BCAR1/PTK2/EDN1/HIF1A/SASH1/SEMA5A/PLXND1/ETS1/CDH13/MYH9/MEF2C/LGMN/RHOJ/STAT1/EGF/VEGFC/RHOB/EPHA2/SCG2	22	CAF2 Up (679)	CAF2 Up (679)
GOBP_REGULATION_OF_CYCLIN_DEPENDENT_PROTEIN_KINASE_ACTIVITY	GOBP_REGULATION_OF_CYCLIN_DEPENDENT_PROTEIN_KINASE_ACTIVITY	10/332	96/15048	5.01571e-05	0.00276504	0.00251516	PSRC1/CDC25C/CKS1B/CCNF/BLM/BCCIP/CCNB1/GTPBP4/HSP90AB1/CDK5RAP1	10	Unknown Up (460)	Unknown Up (460)
GOBP_NEGATIVE_REGULATION_OF_EXTRINSIC_APOPTOTIC_SIGNALING_PATHWAY	GOBP_NEGATIVE_REGULATION_OF_EXTRINSIC_APOPTOTIC_SIGNALING_PATHWAY	11/303	96/15048	3.54759e-06	0.00279018	0.00227606	LGALS3/STRADB/HMOX1/HGF/GCLC/GCLM/EYA2/EYA1/FAIM2/NRP1/IL7	11	NAF Up (396)	NAF Up (396)
GOBP_ESTABLISHMENT_OF_PROTEIN_LOCALIZATION_TO_ORGANELLE	GOBP_ESTABLISHMENT_OF_PROTEIN_LOCALIZATION_TO_ORGANELLE	22/332	388/15048	5.26252e-05	0.00284066	0.00258394	BNIP3L/BCS1L/TIMM10/DKC1/HERPUD1/TIMM8A/NUP188/NUP54/HSP90AB1/CCT3/KPNB1/SRP72/TRIM28/PDCD5/IPO11/NUP62/VPS37C/TOMM5/TOMM22/IPO9/NUP98/HTRA2	22	Unknown Up (460)	Unknown Up (460)
GOBP_REGULATION_OF_CYTOSKELETON_ORGANIZATION	GOBP_REGULATION_OF_CYTOSKELETON_ORGANIZATION	33/483	477/15048	2.97442e-05	0.00288936	0.00250411	PDGFA/DAAM2/NTF3/CDK5R1/SYDE1/CYFIP2/CLASP2/ESAM/ELN/DLC1/FHOD1/PTK2/ARPC5/EDN1/CDK2AP2/RGS4/TMSB15A/SEMA5A/EPS8/TPX2/ARHGDIB/PDXP/TPM1/ARHGDIA/PLEKHG2/AFAP1/PDGFRB/SYNPO2/FCHSD2/GPSM2/RHOB/NES/STMN1	33	CAF2 Up (679)	CAF2 Up (679)
GOBP_SPINDLE_LOCALIZATION	GOBP_SPINDLE_LOCALIZATION	9/483	51/15048	3.07451e-05	0.00288936	0.00250411	ACTR2/CLASP2/FMN2/NDE1/MYH9/GPSM2/SPIRE1/NUSAP1/ACTR3	9	CAF2 Up (679)	CAF2 Up (679)
GOBP_REGULATION_OF_CELLULAR_RESPONSE_TO_GROWTH_FACTOR_STIMULUS	GOBP_REGULATION_OF_CELLULAR_RESPONSE_TO_GROWTH_FACTOR_STIMULUS	24/483	296/15048	3.13014e-05	0.00288936	0.00250411	ZNF423/FGF1/HHIP/CYFIP2/THBS1/SOX11/FOXD1/PMEPA1/HIF1A/ZEB2/SMAD7/FBN1/SCUBE3/ITGA3/CITED2/SHISA2/CAV2/SNX25/VEGFC/SEMA6A/CRIM1/HTRA1/ITGA8/FSTL3	24	CAF2 Up (679)	CAF2 Up (679)
GOBP_RIBONUCLEOSIDE_DIPHOSPHATE_METABOLIC_PROCESS	GOBP_RIBONUCLEOSIDE_DIPHOSPHATE_METABOLIC_PROCESS	13/483	106/15048	3.41785e-05	0.00304703	0.00264076	LDHA/HIF1A/ENO1/TPI1/ENO2/PGAM1/AK5/PFKP/PGK1/PRKAG2/SLC2A6/HK2/PGAM4	13	CAF2 Up (679)	CAF2 Up (679)
GOBP_CELL_MATRIX_ADHESION	GOBP_CELL_MATRIX_ADHESION	20/483	223/15048	3.47023e-05	0.00304703	0.00264076	COL5A3/CLASP2/JAG1/DLC1/THBS1/FN1/ITGA11/PTK2/ITGA7/CDH13/SERPINE1/CORO1C/ITGA3/ITGA10/ITGB5/ECM2/ITGBL1/CD36/ITGA8/LIMS1	20	CAF2 Up (679)	CAF2 Up (679)
GOBP_NUCLEOSIDE_DIPHOSPHATE_METABOLIC_PROCESS	GOBP_NUCLEOSIDE_DIPHOSPHATE_METABOLIC_PROCESS	14/483	122/15048	3.66025e-05	0.00306439	0.00265581	LDHA/ENTPD1/HIF1A/ENO1/TPI1/ENO2/PGAM1/AK5/PFKP/PGK1/PRKAG2/SLC2A6/HK2/PGAM4	14	CAF2 Up (679)	CAF2 Up (679)
GOBP_POSITIVE_REGULATION_OF_ENDOTHELIAL_CELL_MIGRATION	GOBP_POSITIVE_REGULATION_OF_ENDOTHELIAL_CELL_MIGRATION	14/483	122/15048	3.66025e-05	0.00306439	0.00265581	FGF1/FOXC2/THBS1/BCAR1/EDN1/HIF1A/SASH1/SEMA5A/ETS1/LGMN/RHOJ/EGF/VEGFC/RHOB	14	CAF2 Up (679)	CAF2 Up (679)
GOBP_ALCOHOL_METABOLIC_PROCESS	GOBP_ALCOHOL_METABOLIC_PROCESS	21/303	340/15048	5.60776e-06	0.00334806	0.00273115	DHRS3/SREBF1/ALDH1A3/MOXD1/TM7SF2/ABCA1/COQ2/SNCA/ALDH1A1/LSS/CYP27A1/ITPKA/SPTLC3/ALDH2/GK/AKR1C4/IDH1/AKR1B1/CH25H/G6PD/HRH1	21	NAF Up (396)	NAF Up (396)
GOBP_MESENCHYMAL_CELL_DIFFERENTIATION	GOBP_MESENCHYMAL_CELL_DIFFERENTIATION	17/303	237/15048	6.38537e-06	0.00334806	0.00273115	SFRP1/MDK/EPHA4/SMAD3/TGFBR3/HGF/KITLG/SEMA3B/SEMA4B/TGFBR2/TCF21/ISL1/NRP1/OSR1/TBX3/SEMA3A/HTR2B	17	NAF Up (396)	NAF Up (396)
GOBP_RESPONSE_TO_MECHANICAL_STIMULUS	GOBP_RESPONSE_TO_MECHANICAL_STIMULUS	18/483	190/15048	4.13975e-05	0.00338707	0.00293546	NRXN2/KIT/TLR4/ANKRD1/THBS1/PTK2/EDN1/BNIP3/ENDOG/PKD2/FADD/STAT1/MAP3K1/CITED2/ANO3/CASP2/SLC2A1/FYN	18	CAF2 Up (679)	CAF2 Up (679)
GOBP_HOMOLOGOUS_RECOMBINATION	GOBP_HOMOLOGOUS_RECOMBINATION	7/332	47/15048	7.03527e-05	0.00357419	0.00325118	RMI1/RAD54L/RAD51AP1/RAD54B/EME1/TOP2A/MSH5	7	Unknown Up (460)	Unknown Up (460)
GOBP_MITOTIC_METAPHASE_PLATE_CONGRESSION	GOBP_MITOTIC_METAPHASE_PLATE_CONGRESSION	7/332	47/15048	7.03527e-05	0.00357419	0.00325118	PSRC1/NUF2/KIFC1/KIF14/CCNB1/KPNB1/NUP62	7	Unknown Up (460)	Unknown Up (460)
GOBP_VENOUS_BLOOD_VESSEL_DEVELOPMENT	GOBP_VENOUS_BLOOD_VESSEL_DEVELOPMENT	4/159	16/15048	1.97854e-05	0.00378052	0.00314483	HEG1/ACVRL1/FOXF1/SEMA3C	4	CAF1 Up (191)	CAF1 Up (191)
GOBP_GLOMERULUS_DEVELOPMENT	GOBP_GLOMERULUS_DEVELOPMENT	10/483	67/15048	5.07842e-05	0.00399357	0.00346109	HEYL/PDGFA/FOXC2/MYO1E/JAG1/NOTCH3/MEF2C/PODXL/PTPRO/PDGFRB	10	CAF2 Up (679)	CAF2 Up (679)
GOBP_CHONDROITIN_SULFATE_PROTEOGLYCAN_BIOSYNTHETIC_PROCESS	GOBP_CHONDROITIN_SULFATE_PROTEOGLYCAN_BIOSYNTHETIC_PROCESS	6/483	22/15048	5.10289e-05	0.00399357	0.00346109	CHSY3/B3GALT6/CHST3/CHST7/UGDH/CHSY1	6	CAF2 Up (679)	CAF2 Up (679)
GOBP_MORPHOGENESIS_OF_EMBRYONIC_EPITHELIUM	GOBP_MORPHOGENESIS_OF_EMBRYONIC_EPITHELIUM	9/159	146/15048	2.46177e-05	0.00436788	0.00363342	LMO4/RDH10/SOX4/WNT2/PRICKLE1/BMP4/ADM/ALDH1A3/PTK7	9	CAF1 Up (191)	CAF1 Up (191)
GOBP_REGULATION_OF_EPITHELIAL_CELL_MIGRATION	GOBP_REGULATION_OF_EPITHELIAL_CELL_MIGRATION	22/483	269/15048	5.84702e-05	0.00447857	0.00388143	FGF1/FOXC2/CLASP2/THBS1/DOCK5/BCAR1/PTK2/EDN1/HIF1A/SASH1/SEMA5A/ETS1/MEF2C/LGMN/RHOJ/CORO1C/HBEGF/ITGA3/EGF/VEGFC/RHOB/EPHA2	22	CAF2 Up (679)	CAF2 Up (679)
GOBP_REGULATION_OF_EXTRINSIC_APOPTOTIC_SIGNALING_PATHWAY	GOBP_REGULATION_OF_EXTRINSIC_APOPTOTIC_SIGNALING_PATHWAY	13/303	149/15048	9.98156e-06	0.004486	0.00365941	SFRP1/LGALS3/STRADB/HMOX1/HGF/GCLC/PYCARD/GCLM/EYA2/EYA1/FAIM2/NRP1/IL7	13	NAF Up (396)	NAF Up (396)
GOBP_OSSIFICATION	GOBP_OSSIFICATION	28/483	391/15048	6.58266e-05	0.00484411	0.00419823	FOXC2/ID4/TFAP2A/ADAMTS7/JAG1/SLC24A3/SOX11/ITGA11/PTK2/OSTN/HIF1A/SMAD7/CLEC3B/MEF2C/SNAI2/SORT1/OSTF1/SCUBE3/MEF2D/RRAS2/SPP1/COL5A2/VEGFC/CRIM1/EPHA2/CHSY1/FSTL3/MN1	28	CAF2 Up (679)	CAF2 Up (679)
GOBP_NEPHRON_DEVELOPMENT	GOBP_NEPHRON_DEVELOPMENT	15/483	145/15048	6.59337e-05	0.00484411	0.00419823	HEYL/PDGFA/FGF1/FOXC2/MYO1E/JAG1/NOTCH3/FOXD1/PKD2/MEF2C/PODXL/PTPRO/STAT1/ITGA3/PDGFRB	15	CAF2 Up (679)	CAF2 Up (679)
GOBP_MUSCLE_CELL_DIFFERENTIATION	GOBP_MUSCLE_CELL_DIFFERENTIATION	26/483	351/15048	6.86859e-05	0.00494538	0.004286	TRIM32/KIT/DMPK/DYSF/ANKRD1/OLFM2/EDN1/SMARCD3/HEY2/PDLIM5/SORBS2/RGS4/MYH11/MYH9/MEF2C/MYOZ1/SORT1/RARA/ACTN4/TPM1/CSRP2/CAV2/PDGFRB/MYOF/PTGFRN/ITGA8	26	CAF2 Up (679)	CAF2 Up (679)
GOBP_REGULATION_OF_OSSIFICATION	GOBP_REGULATION_OF_OSSIFICATION	11/303	110/15048	1.3363e-05	0.00525499	0.0042867	SFRP1/MDK/DHRS3/SMAD3/S1PR1/SMAD6/LTBP3/FBN2/ENPP1/FAM20C/OSR1	11	NAF Up (396)	NAF Up (396)
GOBP_UROGENITAL_SYSTEM_DEVELOPMENT	GOBP_UROGENITAL_SYSTEM_DEVELOPMENT	20/303	340/15048	1.91473e-05	0.00669306	0.00545979	SFRP1/EPHA4/ACAT1/SMAD3/FOXF1/GATA2/SLIT2/SIX4/HOXA13/SMAD6/TCF21/EYA1/SDC4/NRP1/NKX3-1/AKR1B1/RARB/SERPINF1/ASS1/OSR1	20	NAF Up (396)	NAF Up (396)
GOBP_MITOCHONDRIAL_DEPOLARIZATION	GOBP_MITOCHONDRIAL_DEPOLARIZATION	4/159	19/15048	4.11069e-05	0.00680729	0.00566265	GCLM/IFI6/DCN/GCLC	4	CAF1 Up (191)	CAF1 Up (191)
GOBP_NEGATIVE_REGULATION_OF_RESPONSE_TO_EXTERNAL_STIMULUS	GOBP_NEGATIVE_REGULATION_OF_RESPONSE_TO_EXTERNAL_STIMULUS	22/303	401/15048	2.16566e-05	0.00681315	0.00555776	MDK/EPHA4/SMAD3/NBL1/FOXF1/SLIT2/LRFN5/HGF/CD9/SEMA3B/PPARG/SEMA4B/PLK2/NUCB2/NR1H3/ISL1/NRP1/PLAT/SERPINF1/TRIB1/PROS1/SEMA3A	22	NAF Up (396)	NAF Up (396)
GOBP_KIDNEY_EPITHELIUM_DEVELOPMENT	GOBP_KIDNEY_EPITHELIUM_DEVELOPMENT	12/303	139/15048	2.43686e-05	0.00696942	0.00568523	SFRP1/EPHA4/ACAT1/SMAD3/SLIT2/SIX4/SMAD6/TCF21/EYA1/SDC4/RARB/OSR1	12	NAF Up (396)	NAF Up (396)
GOBP_CARDIAC_CHAMBER_MORPHOGENESIS	GOBP_CARDIAC_CHAMBER_MORPHOGENESIS	8/159	122/15048	4.52601e-05	0.00702662	0.0058451	DHRS3/SOX4/HEG1/WNT2/BMP4/TGFBR2/FOXF1/SEMA3C	8	CAF1 Up (191)	CAF1 Up (191)
GOBP_MESONEPHROS_DEVELOPMENT	GOBP_MESONEPHROS_DEVELOPMENT	10/303	98/15048	2.76766e-05	0.00711068	0.00580046	SFRP1/SMAD3/SLIT2/SIX4/SMAD6/TCF21/EYA1/SDC4/RARB/OSR1	10	NAF Up (396)	NAF Up (396)
GOBP_EXTRINSIC_APOPTOTIC_SIGNALING_PATHWAY	GOBP_EXTRINSIC_APOPTOTIC_SIGNALING_PATHWAY	15/303	214/15048	2.9383e-05	0.00711068	0.00580046	SFRP1/LGALS3/STRADB/HMOX1/SMAD3/HGF/KITLG/GCLC/PYCARD/GCLM/EYA2/EYA1/FAIM2/NRP1/IL7	15	NAF Up (396)	NAF Up (396)
GOBP_MESENCHYMAL_CELL_PROLIFERATION	GOBP_MESENCHYMAL_CELL_PROLIFERATION	5/159	41/15048	6.8159e-05	0.00974814	0.00810899	WNT2/BMP4/TGFBR2/FGF7/FOXF1	5	CAF1 Up (191)	CAF1 Up (191)
GOBP_EXTERNAL_ENCAPSULATING_STRUCTURE_ORGANIZATION	GOBP_EXTERNAL_ENCAPSULATING_STRUCTURE_ORGANIZATION	12/159	295/15048	7.06387e-05	0.00974814	0.00810899	FBLN5/DPP4/APP/FBLN1/ADAMTS5/SLC39A8/LAMB1/GAS6/PDPN/LUM/ANTXR1/FOXF1	12	CAF1 Up (191)	CAF1 Up (191)
GOBP_BRANCHING_MORPHOGENESIS_OF_AN_EPITHELIAL_TUBE	GOBP_BRANCHING_MORPHOGENESIS_OF_AN_EPITHELIAL_TUBE	12/303	152/15048	5.89585e-05	0.0125468	0.0102349	MDK/FOXF1/SLIT2/SIX4/TGFBR2/TCF21/EYA1/HOXA5/MET/NRP1/NKX3-1/TBX3	12	NAF Up (396)	NAF Up (396)
GOBP_NEGATIVE_REGULATION_OF_LIPID_STORAGE	GOBP_NEGATIVE_REGULATION_OF_LIPID_STORAGE	5/303	22/15048	6.3643e-05	0.0125468	0.0102349	ABCA1/PPARG/ABHD5/NR1H3/NFKBIA	5	NAF Up (396)	NAF Up (396)
GOBP_CARDIAC_SEPTUM_MORPHOGENESIS	GOBP_CARDIAC_SEPTUM_MORPHOGENESIS	8/303	68/15048	6.38107e-05	0.0125468	0.0102349	DHRS3/TGFBR3/SLIT2/SMAD6/TGFBR2/ISL1/NRP1/TBX3	8	NAF Up (396)	NAF Up (396)
GOBP_EMBRYONIC_ORGAN_MORPHOGENESIS	GOBP_EMBRYONIC_ORGAN_MORPHOGENESIS	17/303	286/15048	7.1188e-05	0.013174	0.0107465	LRIG3/ALDH1A3/SMAD3/FOXF1/GATA2/TSHZ1/SIX4/TGFBR2/FBN2/TCF21/EYA1/HOXA5/LRIG1/TTC39C/RARB/OSR1/TBX3	17	NAF Up (396)	NAF Up (396)
GOBP_EAR_DEVELOPMENT	GOBP_EAR_DEVELOPMENT	14/303	207/15048	7.9616e-05	0.0137149	0.0111878	EPHA4/LRIG3/ALDH1A3/CEBPD/GATA2/TSHZ1/SIX4/HOXA13/EYA1/SDC4/LRIG1/TTC39C/OSR1/TBX3	14	NAF Up (396)	NAF Up (396)
GOBP_NEGATIVE_REGULATION_OF_PROTEIN_MODIFICATION_PROCESS	GOBP_NEGATIVE_REGULATION_OF_PROTEIN_MODIFICATION_PROCESS	23/303	470/15048	8.28299e-05	0.0137149	0.0111878	SFRP1/BAG2/LGALS3/RGS2/NXN/FBLN1/SQSTM1/SLIT2/PKIA/HGF/PPARG/GCLC/SMAD6/PYCARD/RPS7/SNCA/ENPP1/CAMK2N1/BDKRB2/CNKSR3/TRIB1/G6PD/BDKRB1	23	NAF Up (396)	NAF Up (396)
GOBP_CARDIAC_VENTRICLE_MORPHOGENESIS	GOBP_CARDIAC_VENTRICLE_MORPHOGENESIS	6/159	72/15048	0.000111268	0.0139319	0.0115892	SOX4/HEG1/BMP4/TGFBR2/FOXF1/SEMA3C	6	CAF1 Up (191)	CAF1 Up (191)
GOBP_HEMOSTASIS	GOBP_HEMOSTASIS	10/159	219/15048	0.000112173	0.0139319	0.0115892	AK3/TYRO3/FBLN1/IL6ST/GAS6/PDPN/NFE2L2/ITGA2/F3/VTN	10	CAF1 Up (191)	CAF1 Up (191)
GOBP_NEGATIVE_REGULATION_OF_MACROPHAGE_DERIVED_FOAM_CELL_DIFFERENTIATION	GOBP_NEGATIVE_REGULATION_OF_MACROPHAGE_DERIVED_FOAM_CELL_DIFFERENTIATION	4/303	13/15048	9.98187e-05	0.0148762	0.0121351	ABCA1/PPARG/NR1H3/NFKBIA	4	NAF Up (396)	NAF Up (396)
GOBP_EPITHELIAL_TUBE_MORPHOGENESIS	GOBP_EPITHELIAL_TUBE_MORPHOGENESIS	18/303	324/15048	0.000104111	0.0148762	0.0121351	SFRP1/MDK/EPHA4/SMAD3/FOXF1/SLIT2/SIX4/TGFBR2/RPS7/TCF21/EYA1/HOXA5/MET/SDC4/NRP1/NKX3-1/OSR1/TBX3	18	NAF Up (396)	NAF Up (396)
GOBP_RESPONSE_TO_KETONE	GOBP_RESPONSE_TO_KETONE	13/303	187/15048	0.000108272	0.0148762	0.0121351	SFRP1/GNG2/PTGER2/SREBF1/TGFBR3/SLIT2/HOXA13/NR1H3/PARP1/NKX3-1/PLAT/SERPINF1/ASS1	13	NAF Up (396)	NAF Up (396)
GOBP_NEGATIVE_REGULATION_OF_NEURON_APOPTOTIC_PROCESS	GOBP_NEGATIVE_REGULATION_OF_NEURON_APOPTOTIC_PROCESS	11/303	138/15048	0.000109583	0.0148762	0.0121351	MDK/HMOX1/SOD2/SIX4/GCLC/IL6ST/GCLM/SNCA/ISL1/FAIM2/NRP1	11	NAF Up (396)	NAF Up (396)
GOBP_REGULATION_OF_ACTIN_FILAMENT_ORGANIZATION	GOBP_REGULATION_OF_ACTIN_FILAMENT_ORGANIZATION	15/303	242/15048	0.000119089	0.0148762	0.0121351	SFRP1/SMAD3/ASAP3/S1PR1/BIN1/SLIT2/CAPG/LPAR1/CDC42EP4/PYCARD/TMOD1/MET/SDC4/NRP1/CGNL1	15	NAF Up (396)	NAF Up (396)
GOBP_REGULATION_OF_ACTOMYOSIN_STRUCTURE_ORGANIZATION	GOBP_REGULATION_OF_ACTOMYOSIN_STRUCTURE_ORGANIZATION	9/303	95/15048	0.000124612	0.0148762	0.0121351	SFRP1/SMAD3/ASAP3/S1PR1/LPAR1/MET/SDC4/NRP1/CGNL1	9	NAF Up (396)	NAF Up (396)
GOBP_GENERATION_OF_PRECURSOR_METABOLITES_AND_ENERGY	GOBP_GENERATION_OF_PRECURSOR_METABOLITES_AND_ENERGY	21/303	421/15048	0.000129682	0.0148762	0.0121351	TKT/DHRS3/ACAT1/SOD2/GNPDA1/SLC25A22/IL6ST/ACO1/ME1/OXCT2/SNCA/ENPP1/ALDH2/IRS1/AKR1C4/CROT/GFPT2/PGD/IDH1/AKR1B1/G6PD	21	NAF Up (396)	NAF Up (396)
GOBP_EAR_MORPHOGENESIS	GOBP_EAR_MORPHOGENESIS	10/303	118/15048	0.000135237	0.0148762	0.0121351	LRIG3/ALDH1A3/GATA2/TSHZ1/SIX4/EYA1/LRIG1/TTC39C/OSR1/TBX3	10	NAF Up (396)	NAF Up (396)
GOBP_REGULATION_OF_ACTIN_FILAMENT_BASED_PROCESS	GOBP_REGULATION_OF_ACTIN_FILAMENT_BASED_PROCESS	19/303	362/15048	0.000141398	0.0148762	0.0121351	SFRP1/MDK/SMAD3/RHOBTB3/ASAP3/S1PR1/BIN1/SLIT2/CAPG/LPAR1/KCNJ2/CDC42EP4/PYCARD/TMOD1/MET/SDC4/NRP1/CGNL1/FGF13	19	NAF Up (396)	NAF Up (396)
GOBP_PATTERN_SPECIFICATION_PROCESS	GOBP_PATTERN_SPECIFICATION_PROCESS	21/303	426/15048	0.000152687	0.0148762	0.0121351	SFRP1/SMAD3/NBL1/FOXF1/MID1/TSHZ1/SMAD6/TGFBR2/MEIS1/EYA1/PBX3/HOXA5/ISL1/NRP1/NKX3-1/MEIS2/OSR1/TBX3/SEMA3A/FST/RELN	21	NAF Up (396)	NAF Up (396)
GOBP_NEGATIVE_REGULATION_OF_PHOSPHORUS_METABOLIC_PROCESS	GOBP_NEGATIVE_REGULATION_OF_PHOSPHORUS_METABOLIC_PROCESS	20/303	396/15048	0.00015888	0.0148762	0.0121351	SFRP1/LGALS3/RGS2/FBLN1/SLIT2/PKIA/HGF/LPIN1/PPARG/SMAD6/PYCARD/SNCA/PPP2R5A/PARP1/ENPP1/CAMK2N1/BDKRB2/CNKSR3/TRIB1/BDKRB1	20	NAF Up (396)	NAF Up (396)
GOBP_OUTFLOW_TRACT_MORPHOGENESIS	GOBP_OUTFLOW_TRACT_MORPHOGENESIS	8/303	78/15048	0.000170119	0.0148762	0.0121351	DHRS3/TGFBR3/SMAD6/TGFBR2/EYA1/ISL1/NRP1/TBX3	8	NAF Up (396)	NAF Up (396)
GOBP_CARDIAC_SEPTUM_DEVELOPMENT	GOBP_CARDIAC_SEPTUM_DEVELOPMENT	9/303	99/15048	0.000171155	0.0148762	0.0121351	DHRS3/TGFBR3/SLIT2/HOXA13/SMAD6/TGFBR2/ISL1/NRP1/TBX3	9	NAF Up (396)	NAF Up (396)
GOBP_REGULATION_OF_ACTIN_FILAMENT_BUNDLE_ASSEMBLY	GOBP_REGULATION_OF_ACTIN_FILAMENT_BUNDLE_ASSEMBLY	9/303	99/15048	0.000171155	0.0148762	0.0121351	SFRP1/SMAD3/ASAP3/S1PR1/LPAR1/MET/SDC4/NRP1/CGNL1	9	NAF Up (396)	NAF Up (396)
GOBP_CARDIAC_CHAMBER_MORPHOGENESIS	GOBP_CARDIAC_CHAMBER_MORPHOGENESIS	10/303	122/15048	0.00017822	0.0148762	0.0121351	DHRS3/TGFBR3/FOXF1/SLIT2/LY6E/SMAD6/TGFBR2/ISL1/NRP1/TBX3	10	NAF Up (396)	NAF Up (396)
GOBP_POSITIVE_REGULATION_OF_CHOLESTEROL_EFFLUX	GOBP_POSITIVE_REGULATION_OF_CHOLESTEROL_EFFLUX	5/303	27/15048	0.000179649	0.0148762	0.0121351	ABCA1/PPARG/PLTP/NR1H3/NFKBIA	5	NAF Up (396)	NAF Up (396)
GOBP_REGULATION_OF_NEURON_PROJECTION_DEVELOPMENT	GOBP_REGULATION_OF_NEURON_PROJECTION_DEVELOPMENT	20/303	400/15048	0.000181569	0.0148762	0.0121351	SFRP1/RGS2/MDK/NR2F1/EPHA4/SLIT2/LPAR1/HGF/SEMA3B/TMEM106B/SEMA4B/MYLIP/NLGN1/ITPKA/NTNG1/NRP1/SERPINF1/SEMA3A/RELN/FGF13	20	NAF Up (396)	NAF Up (396)
GOBP_MORPHOGENESIS_OF_AN_EPITHELIUM	GOBP_MORPHOGENESIS_OF_AN_EPITHELIUM	23/303	496/15048	0.000183502	0.0148762	0.0121351	SFRP1/MDK/EPHA4/ALDH1A3/SMAD3/FOXF1/SLIT2/HGF/SIX4/HOXA13/TGFBR2/RPS7/TCF21/EYA1/HOXA5/MET/SDC4/NRP1/NKX3-1/OSR1/TBX3/SEMA3A/FST	23	NAF Up (396)	NAF Up (396)
GOBP_REGULATION_OF_SUPRAMOLECULAR_FIBER_ORGANIZATION	GOBP_REGULATION_OF_SUPRAMOLECULAR_FIBER_ORGANIZATION	18/303	340/15048	0.000189953	0.0148762	0.0121351	SFRP1/SMAD3/ASAP3/S1PR1/BIN1/SLIT2/CAPG/LPAR1/MID1/CDC42EP4/PYCARD/SNCA/TMOD1/MET/SDC4/NRP1/CGNL1/FGF13	18	NAF Up (396)	NAF Up (396)
GOBP_REGULATION_OF_OSTEOBLAST_DIFFERENTIATION	GOBP_REGULATION_OF_OSTEOBLAST_DIFFERENTIATION	10/303	123/15048	0.0001906	0.0148762	0.0121351	SFRP1/SMAD3/CEBPD/HGF/PPARG/IL6ST/SMAD6/FBN2/TWIST2/FAM20C	10	NAF Up (396)	NAF Up (396)
GOBP_FATTY_ACID_METABOLIC_PROCESS	GOBP_FATTY_ACID_METABOLIC_PROCESS	19/303	371/15048	0.000193854	0.0148762	0.0121351	GPX4/SREBF1/ACAT1/ZADH2/ELOVL5/LPIN1/SCD/PPARG/ABHD5/ACSL3/SNCA/NR1H3/IRS1/AKR1C4/CROT/FADS1/PTGES/AKR1B1/FASN	19	NAF Up (396)	NAF Up (396)
GOBP_NEURAL_CREST_CELL_MIGRATION	GOBP_NEURAL_CREST_CELL_MIGRATION	7/303	60/15048	0.000193873	0.0148762	0.0121351	KITLG/SEMA3B/SEMA4B/ISL1/NRP1/SEMA3A/HTR2B	7	NAF Up (396)	NAF Up (396)
GOBP_MUSCLE_TISSUE_DEVELOPMENT	GOBP_MUSCLE_TISSUE_DEVELOPMENT	19/303	374/15048	0.000214788	0.0155521	0.0126865	RGS2/SMAD3/TGFBR3/S1PR1/LY6E/VAMP5/SIX4/SOX15/HOPX/TGFBR2/EYA2/TCF21/EYA1/PGM5/ISL1/RARB/OSR1/G6PD/TBX3	19	NAF Up (396)	NAF Up (396)
GOBP_REGULATION_OF_MUSCLE_HYPERTROPHY	GOBP_REGULATION_OF_MUSCLE_HYPERTROPHY	7/303	61/15048	0.000215283	0.0155521	0.0126865	RGS2/SMAD3/PPARG/IL6ST/PARP1/PDE5A/G6PD	7	NAF Up (396)	NAF Up (396)
GOBP_ORGANIC_HYDROXY_COMPOUND_BIOSYNTHETIC_PROCESS	GOBP_ORGANIC_HYDROXY_COMPOUND_BIOSYNTHETIC_PROCESS	14/303	228/15048	0.000220375	0.0155521	0.0126865	SREBF1/MOXD1/TM7SF2/PLTP/SNCA/LSS/CYP27A1/ITPKA/SPTLC3/ALDH2/AKR1C4/CH25H/G6PD/HRH1	14	NAF Up (396)	NAF Up (396)
GOBP_REGENERATION	GOBP_REGENERATION	12/303	175/15048	0.000225305	0.0155521	0.0126865	MDK/EPHA4/HMOX1/TGFBR3/NINJ1/HGF/CD9/LPIN1/SOX15/HOPX/TGFBR2/ISL1	12	NAF Up (396)	NAF Up (396)
GOBP_STRESS_FIBER_ASSEMBLY	GOBP_STRESS_FIBER_ASSEMBLY	9/303	103/15048	0.000231362	0.0155521	0.0126865	SFRP1/SMAD3/ASAP3/S1PR1/LPAR1/MET/SDC4/NRP1/CGNL1	9	NAF Up (396)	NAF Up (396)
GOBP_REGULATION_OF_APOPTOTIC_SIGNALING_PATHWAY	GOBP_REGULATION_OF_APOPTOTIC_SIGNALING_PATHWAY	18/303	346/15048	0.000235395	0.0155521	0.0126865	SFRP1/LGALS3/STRADB/HMOX1/SOD2/HGF/GCLC/PYCARD/RPS7/GCLM/PARP1/EYA2/EYA1/FAIM2/NRP1/NKX3-1/BDKRB2/IL7	18	NAF Up (396)	NAF Up (396)
GOBP_NEGATIVE_REGULATION_OF_CELL_GROWTH	GOBP_NEGATIVE_REGULATION_OF_CELL_GROWTH	12/303	176/15048	0.000237522	0.0155521	0.0126865	SFRP1/RGS2/SMAD3/SLIT2/SEMA3B/SEMA4B/ENPP1/NRP1/G6PD/SEMA3A/BDKRB1/FGF13	12	NAF Up (396)	NAF Up (396)
GOBP_REGULATION_OF_PHOSPHOLIPID_BIOSYNTHETIC_PROCESS	GOBP_REGULATION_OF_PHOSPHOLIPID_BIOSYNTHETIC_PROCESS	4/303	16/15048	0.00024223	0.0155521	0.0126865	LPIN1/ACSL3/IDH1/HTR2B	4	NAF Up (396)	NAF Up (396)
GOBP_MODULATION_OF_AGE_RELATED_BEHAVIORAL_DECLINE	GOBP_MODULATION_OF_AGE_RELATED_BEHAVIORAL_DECLINE	3/159	10/15048	0.000131548	0.0155603	0.0129438	PRNP/APP/PICALM	3	CAF1 Up (191)	CAF1 Up (191)
GOBP_NEURON_APOPTOTIC_PROCESS	GOBP_NEURON_APOPTOTIC_PROCESS	14/303	232/15048	0.000263552	0.0162786	0.0132791	MDK/HMOX1/TRIM2/SOD2/SIX4/GCLC/IL6ST/GCLM/SNCA/PARP1/ISL1/FAIM2/NRP1/G6PD	14	NAF Up (396)	NAF Up (396)
GOBP_DENDRITIC_CELL_DIFFERENTIATION	GOBP_DENDRITIC_CELL_DIFFERENTIATION	5/159	48/15048	0.00014674	0.0165682	0.0137823	TMEM176A/TMEM176B/TGFBR2/GAS6/LTBR	5	CAF1 Up (191)	CAF1 Up (191)
GOBP_CARBOHYDRATE_DERIVATIVE_TRANSPORT	GOBP_CARBOHYDRATE_DERIVATIVE_TRANSPORT	6/159	77/15048	0.000161684	0.0174618	0.0145256	SLC35C1/SCARB1/LRRC8D/ABCC3/SLC15A3/ABCC4	6	CAF1 Up (191)	CAF1 Up (191)
GOBP_EPITHELIAL_TUBE_MORPHOGENESIS	GOBP_EPITHELIAL_TUBE_MORPHOGENESIS	12/159	324/15048	0.00017086	0.017684	0.0147104	LMO4/RDH10/SOX4/WNT2/PRICKLE1/FGF2/BMP4/TGFBR2/ACVRL1/ADM/PTK7/FOXF1	12	CAF1 Up (191)	CAF1 Up (191)
GOBP_LIMB_BUD_FORMATION	GOBP_LIMB_BUD_FORMATION	3/159	11/15048	0.000179477	0.0178328	0.0148342	SOX4/ZNF219/SEMA3C	3	CAF1 Up (191)	CAF1 Up (191)
GOBP_TUBE_FORMATION	GOBP_TUBE_FORMATION	8/159	150/15048	0.000192666	0.018407	0.0153119	LMO4/TGM2/SOX4/PRICKLE1/FGF2/BMP4/ADM/PTK7	8	CAF1 Up (191)	CAF1 Up (191)
GOBP_EPITHELIAL_TUBE_BRANCHING_INVOLVED_IN_LUNG_MORPHOGENESIS	GOBP_EPITHELIAL_TUBE_BRANCHING_INVOLVED_IN_LUNG_MORPHOGENESIS	4/159	29/15048	0.000231994	0.0205812	0.0171205	RDH10/WNT2/BMP4/FOXF1	4	CAF1 Up (191)	CAF1 Up (191)
GOBP_REGULATION_OF_MESENCHYMAL_CELL_PROLIFERATION	GOBP_REGULATION_OF_MESENCHYMAL_CELL_PROLIFERATION	4/159	29/15048	0.000231994	0.0205812	0.0171205	WNT2/BMP4/TGFBR2/FOXF1	4	CAF1 Up (191)	CAF1 Up (191)
GOBP_LYMPH_VESSEL_DEVELOPMENT	GOBP_LYMPH_VESSEL_DEVELOPMENT	4/159	30/15048	0.000265496	0.0227411	0.0189172	HEG1/SVEP1/ACVRL1/PDPN	4	CAF1 Up (191)	CAF1 Up (191)
GOBP_AGING	GOBP_AGING	11/159	295/15048	0.000302018	0.02377	0.0197731	PRNP/ASS1/APP/PICALM/FGF2/GCLM/TGFBR2/ADM/APOD/NFE2L2/GCLC	11	CAF1 Up (191)	CAF1 Up (191)
GOBP_ADHESION_OF_SYMBIONT_TO_HOST	GOBP_ADHESION_OF_SYMBIONT_TO_HOST	3/159	13/15048	0.000306293	0.02377	0.0197731	SCARB1/ICAM1/GAS6	3	CAF1 Up (191)	CAF1 Up (191)
GOBP_RESPONSE_TO_LAMINAR_FLUID_SHEAR_STRESS	GOBP_RESPONSE_TO_LAMINAR_FLUID_SHEAR_STRESS	3/159	13/15048	0.000306293	0.02377	0.0197731	ASS1/ABCA1/NFE2L2	3	CAF1 Up (191)	CAF1 Up (191)
GOBP_COLUMNAR_CUBOIDAL_EPITHELIAL_CELL_DIFFERENTIATION	GOBP_COLUMNAR_CUBOIDAL_EPITHELIAL_CELL_DIFFERENTIATION	6/159	87/15048	0.000315785	0.02377	0.0197731	SOX4/FAM20C/FGF2/BMP4/IL6ST/PRDM1	6	CAF1 Up (191)	CAF1 Up (191)
GOBP_ODONTOGENESIS	GOBP_ODONTOGENESIS	7/159	124/15048	0.000344877	0.0251963	0.0209595	PERP/FAM20C/BMP4/ADAMTS5/ADM/LAMB1/FAM20A	7	CAF1 Up (191)	CAF1 Up (191)
GOBP_POSITIVE_CHEMOTAXIS	GOBP_POSITIVE_CHEMOTAXIS	5/159	58/15048	0.000360728	0.0256014	0.0212965	FGF2/BMP4/ITGA2/FGF7/F3	5	CAF1 Up (191)	CAF1 Up (191)
GOBP_NEGATIVE_REGULATION_OF_LOCOMOTION	GOBP_NEGATIVE_REGULATION_OF_LOCOMOTION	12/159	354/15048	0.000383672	0.0264734	0.0220219	PODN/DPP4/FGF2/FBLN1/IGFBP3/LIMCH1/ACVRL1/APOD/NFE2L2/DCN/PTPRK/SEMA3C	12	CAF1 Up (191)	CAF1 Up (191)
GOBP_REGULATION_OF_ANIMAL_ORGAN_MORPHOGENESIS	GOBP_REGULATION_OF_ANIMAL_ORGAN_MORPHOGENESIS	7/159	127/15048	0.00039875	0.0267702	0.0222688	PRICKLE2/WNT2/PRICKLE1/FGF2/BMP4/FGF7/PTK7	7	CAF1 Up (191)	CAF1 Up (191)
GOBP_MORPHOGENESIS_OF_AN_EPITHELIAL_BUD	GOBP_MORPHOGENESIS_OF_AN_EPITHELIAL_BUD	3/159	15/15048	0.000479772	0.0294244	0.0244767	RDH10/WNT2/BMP4	3	CAF1 Up (191)	CAF1 Up (191)
GOBP_DIGESTIVE_SYSTEM_DEVELOPMENT	GOBP_DIGESTIVE_SYSTEM_DEVELOPMENT	7/159	133/15048	0.000526656	0.0294244	0.0244767	ASS1/RARRES2/BMP4/TGFBR2/IL6ST/PRDM1/FOXF1	7	CAF1 Up (191)	CAF1 Up (191)
GOBP_ANIMAL_ORGAN_FORMATION	GOBP_ANIMAL_ORGAN_FORMATION	5/159	63/15048	0.000530398	0.0294244	0.0244767	RDH10/WNT2/FGF2/BMP4/TGFBR2	5	CAF1 Up (191)	CAF1 Up (191)
GOBP_GLUTATHIONE_METABOLIC_PROCESS	GOBP_GLUTATHIONE_METABOLIC_PROCESS	5/159	63/15048	0.000530398	0.0294244	0.0244767	GCLM/NFE2L2/CTNS/GCLC/CLIC3	5	CAF1 Up (191)	CAF1 Up (191)
GOBP_NEGATIVE_REGULATION_OF_EXTRINSIC_APOPTOTIC_SIGNALING_PATHWAY	GOBP_NEGATIVE_REGULATION_OF_EXTRINSIC_APOPTOTIC_SIGNALING_PATHWAY	6/159	96/15048	0.000536294	0.0294244	0.0244767	ICAM1/GCLM/BMP4/IFI6/TMBIM1/GCLC	6	CAF1 Up (191)	CAF1 Up (191)
GOBP_TERPENOID_METABOLIC_PROCESS	GOBP_TERPENOID_METABOLIC_PROCESS	6/159	96/15048	0.000536294	0.0294244	0.0244767	ALDH1A1/DHRS3/RDH10/RARRES2/ALDH1A3/SCPEP1	6	CAF1 Up (191)	CAF1 Up (191)
GOBP_REGULATION_OF_BODY_FLUID_LEVELS	GOBP_REGULATION_OF_BODY_FLUID_LEVELS	12/159	368/15048	0.000542346	0.0294244	0.0244767	HEG1/AK3/TYRO3/FBLN1/IL6ST/ADM/GAS6/PDPN/NFE2L2/ITGA2/F3/VTN	12	CAF1 Up (191)	CAF1 Up (191)
GOBP_EPITHELIAL_TUBE_FORMATION	GOBP_EPITHELIAL_TUBE_FORMATION	7/159	134/15048	0.000550833	0.0294244	0.0244767	LMO4/SOX4/PRICKLE1/FGF2/BMP4/ADM/PTK7	7	CAF1 Up (191)	CAF1 Up (191)
GOBP_POSITIVE_REGULATION_OF_OSTEOBLAST_DIFFERENTIATION	GOBP_POSITIVE_REGULATION_OF_OSTEOBLAST_DIFFERENTIATION	5/159	64/15048	0.000570496	0.0294244	0.0244767	FAM20C/FGF2/BMP4/IL6ST/CEBPD	5	CAF1 Up (191)	CAF1 Up (191)
GOBP_REGULATION_OF_MITOCHONDRIAL_MEMBRANE_POTENTIAL	GOBP_REGULATION_OF_MITOCHONDRIAL_MEMBRANE_POTENTIAL	5/159	64/15048	0.000570496	0.0294244	0.0244767	GCLM/IFI6/DCN/CTNS/GCLC	5	CAF1 Up (191)	CAF1 Up (191)
GOBP_CELLULAR_COPPER_ION_HOMEOSTASIS	GOBP_CELLULAR_COPPER_ION_HOMEOSTASIS	3/159	16/15048	0.000585923	0.0294244	0.0244767	PRNP/SLC31A1/APP	3	CAF1 Up (191)	CAF1 Up (191)
GOBP_CELLULAR_RESPONSE_TO_THYROID_HORMONE_STIMULUS	GOBP_CELLULAR_RESPONSE_TO_THYROID_HORMONE_STIMULUS	3/159	16/15048	0.000585923	0.0294244	0.0244767	GCLM/CTSB/GCLC	3	CAF1 Up (191)	CAF1 Up (191)
GOBP_CELLULAR_HORMONE_METABOLIC_PROCESS	GOBP_CELLULAR_HORMONE_METABOLIC_PROCESS	7/159	136/15048	0.000601834	0.0294244	0.0244767	ALDH1A1/DHRS3/RDH10/HSD17B6/ADM/ALDH1A3/SCPEP1	7	CAF1 Up (191)	CAF1 Up (191)

## Sheet: Table S5
ID	Description	GeneRatio	BgRatio	pvalue	p.adjust	qvalue	geneID	Count	Cluster	group
REACTOME_INTEGRIN_CELL_SURFACE_INTERACTIONS	REACTOME_INTEGRIN_CELL_SURFACE_INTERACTIONS	18/355	84/9664	1.0032e-09	8.22622e-07	7.43422e-07	COL5A3/THBS1/FN1/ITGA11/ITGA7/COL4A2/FBN1/COL18A1/COL5A1/COL4A1/ITGA3/COL8A1/SPP1/ITGA10/ITGB5/COL5A2/ITGA8/COL4A5	18	CAF2 Up (679)	CAF2 Up (679)
REACTOME_EXTRACELLULAR_MATRIX_ORGANIZATION	REACTOME_EXTRACELLULAR_MATRIX_ORGANIZATION	17/116	289/9664	5.42205e-08	1.97905e-05	1.80925e-05	LAMA4/FBLN5/LAMA2/ICAM1/APP/CASK/FGF2/FBLN1/BMP4/ADAMTS5/CTSB/LAMB1/LUM/DCN/ITGA2/SH3PXD2A/VTN	17	CAF1 Up (191)	CAF1 Up (191)
REACTOME_EXTRACELLULAR_MATRIX_ORGANIZATION	REACTOME_EXTRACELLULAR_MATRIX_ORGANIZATION	31/355	289/9664	7.23108e-08	2.75619e-05	2.49083e-05	PDGFA/COL5A3/NTN4/ACAN/SDC2/ELN/THBS1/MMP11/FN1/ITGA11/ITGA7/COL22A1/COL4A2/PLOD1/FBN1/SERPINE1/LOXL3/SCUBE3/COL18A1/COL5A1/COL4A1/ITGA3/COL8A1/SPP1/ITGA10/P4HA1/ITGB5/COL5A2/HTRA1/ITGA8/COL4A5	31	CAF2 Up (679)	CAF2 Up (679)
REACTOME_SIGNALING_BY_PDGF	REACTOME_SIGNALING_BY_PDGF	13/355	57/9664	1.00836e-07	2.75619e-05	2.49083e-05	PDGFA/COL5A3/THBS1/BCAR1/COL4A2/STAT1/COL5A1/COL4A1/PDGFRB/SPP1/NRAS/COL5A2/COL4A5	13	CAF2 Up (679)	CAF2 Up (679)
REACTOME_NON_INTEGRIN_MEMBRANE_ECM_INTERACTIONS	REACTOME_NON_INTEGRIN_MEMBRANE_ECM_INTERACTIONS	12/355	59/9664	1.18124e-06	0.000242154	0.00021884	PDGFA/COL5A3/NTN4/SDC2/THBS1/FN1/COL4A2/COL5A1/COL4A1/ITGB5/COL5A2/COL4A5	12	CAF2 Up (679)	CAF2 Up (679)
REACTOME_ECM_PROTEOGLYCANS	REACTOME_ECM_PROTEOGLYCANS	8/116	75/9664	2.91927e-06	0.000532766	0.000487056	LAMA4/LAMA2/APP/LAMB1/LUM/DCN/ITGA2/VTN	8	CAF1 Up (191)	CAF1 Up (191)
REACTOME_NON_INTEGRIN_MEMBRANE_ECM_INTERACTIONS	REACTOME_NON_INTEGRIN_MEMBRANE_ECM_INTERACTIONS	7/116	59/9664	6.09719e-06	0.000741825	0.000678179	LAMA4/LAMA2/CASK/FGF2/LAMB1/ITGA2/VTN	7	CAF1 Up (191)	CAF1 Up (191)
REACTOME_NR1H2_AND_NR1H3_MEDIATED_SIGNALING	REACTOME_NR1H2_AND_NR1H3_MEDIATED_SIGNALING	8/212	39/9664	1.61083e-06	0.000898842	0.000847804	TBL1X/SREBF1/ABCA1/SCD/PLTP/MYLIP/NR1H3/FASN	8	NAF Up (396)	NAF Up (396)
REACTOME_COLLAGEN_BIOSYNTHESIS_AND_MODIFYING_ENZYMES	REACTOME_COLLAGEN_BIOSYNTHESIS_AND_MODIFYING_ENZYMES	11/355	60/9664	9.57635e-06	0.00157052	0.00141932	COL5A3/COL22A1/COL4A2/PLOD1/COL18A1/COL5A1/COL4A1/COL8A1/P4HA1/COL5A2/COL4A5	11	CAF2 Up (679)	CAF2 Up (679)
REACTOME_ECM_PROTEOGLYCANS	REACTOME_ECM_PROTEOGLYCANS	12/355	75/9664	1.62297e-05	0.00196318	0.00177417	COL5A3/ACAN/FN1/ITGA7/COL4A2/SERPINE1/COL5A1/COL4A1/ITGB5/COL5A2/ITGA8/COL4A5	12	CAF2 Up (679)	CAF2 Up (679)
REACTOME_COLLAGEN_CHAIN_TRIMERIZATION	REACTOME_COLLAGEN_CHAIN_TRIMERIZATION	9/355	42/9664	1.67588e-05	0.00196318	0.00177417	COL5A3/COL22A1/COL4A2/COL18A1/COL5A1/COL4A1/COL8A1/COL5A2/COL4A5	9	CAF2 Up (679)	CAF2 Up (679)
REACTOME_SMOOTH_MUSCLE_CONTRACTION	REACTOME_SMOOTH_MUSCLE_CONTRACTION	8/355	34/9664	2.40634e-05	0.0024665	0.00222903	DYSF/CALM1/MYH11/TPM1/ANXA6/CALD1/ITGB5/TLN1	8	CAF2 Up (679)	CAF2 Up (679)
REACTOME_DEGRADATION_OF_THE_EXTRACELLULAR_MATRIX	REACTOME_DEGRADATION_OF_THE_EXTRACELLULAR_MATRIX	16/355	134/9664	3.06622e-05	0.00260173	0.00235124	COL5A3/ACAN/ELN/MMP11/FN1/COL4A2/FBN1/SCUBE3/COL18A1/COL5A1/COL4A1/COL8A1/SPP1/COL5A2/HTRA1/COL4A5	16	CAF2 Up (679)	CAF2 Up (679)
REACTOME_COLLAGEN_FORMATION	REACTOME_COLLAGEN_FORMATION	12/355	80/9664	3.17284e-05	0.00260173	0.00235124	COL5A3/COL22A1/COL4A2/PLOD1/LOXL3/COL18A1/COL5A1/COL4A1/COL8A1/P4HA1/COL5A2/COL4A5	12	CAF2 Up (679)	CAF2 Up (679)
REACTOME_SYNDECAN_INTERACTIONS	REACTOME_SYNDECAN_INTERACTIONS	7/355	27/9664	3.99877e-05	0.0029809	0.00269391	COL5A3/SDC2/THBS1/FN1/COL5A1/ITGB5/COL5A2	7	CAF2 Up (679)	CAF2 Up (679)
REACTOME_PLATELET_ACTIVATION_SIGNALING_AND_AGGREGATION	REACTOME_PLATELET_ACTIVATION_SIGNALING_AND_AGGREGATION	23/355	254/9664	5.86797e-05	0.00400978	0.00362373	PDGFA/PRKCH/CALM1/THBS1/FN1/BCAR1/PTK2/CLEC3B/SERPINE1/ACTN4/APBB1IP/TRPC6/TAGLN2/EGF/RASGRP1/MGLL/VEGFC/RHOB/DAGLB/FYN/TLN1/ENDOD1/CD36	23	CAF2 Up (679)	CAF2 Up (679)
REACTOME_METABOLISM_OF_CARBOHYDRATES	REACTOME_METABOLISM_OF_CARBOHYDRATES	24/355	283/9664	0.00011453	0.0072242	0.00652868	UGP2/ACAN/SDC2/CHSY3/B3GNT2/CALM1/B3GALT6/CSPG4/ENO1/CHST3/B3GALT2/TPI1/PFKFB4/GBE1/ENO2/CHST7/PGAM1/PFKP/PGK1/SLC2A1/GPC4/HK2/CHSY1/PGM2	24	CAF2 Up (679)	CAF2 Up (679)
REACTOME_P130CAS_LINKAGE_TO_MAPK_SIGNALING_FOR_INTEGRINS	REACTOME_P130CAS_LINKAGE_TO_MAPK_SIGNALING_FOR_INTEGRINS	5/355	15/9664	0.000144016	0.00843524	0.00762312	FN1/BCAR1/PTK2/APBB1IP/TLN1	5	CAF2 Up (679)	CAF2 Up (679)
REACTOME_RA_BIOSYNTHESIS_PATHWAY	REACTOME_RA_BIOSYNTHESIS_PATHWAY	4/116	22/9664	0.000121995	0.011132	0.0101769	ALDH1A1/DHRS3/RDH10/ALDH1A3	4	CAF1 Up (191)	CAF1 Up (191)
REACTOME_ASSEMBLY_OF_COLLAGEN_FIBRILS_AND_OTHER_MULTIMERIC_STRUCTURES	REACTOME_ASSEMBLY_OF_COLLAGEN_FIBRILS_AND_OTHER_MULTIMERIC_STRUCTURES	9/355	57/9664	0.000207951	0.011368	0.0102735	COL5A3/COL4A2/LOXL3/COL18A1/COL5A1/COL4A1/COL8A1/COL5A2/COL4A5	9	CAF2 Up (679)	CAF2 Up (679)
REACTOME_CELL_SURFACE_INTERACTIONS_AT_THE_VASCULAR_WALL	REACTOME_CELL_SURFACE_INTERACTIONS_AT_THE_VASCULAR_WALL	8/116	135/9664	0.000210998	0.0154029	0.0140813	PSG5/GAS6/PSG6/PSG1/SLC7A7/PSG3/PSG9/PSG4	8	CAF1 Up (191)	CAF1 Up (191)
REACTOME_COLLAGEN_DEGRADATION	REACTOME_COLLAGEN_DEGRADATION	9/355	60/9664	0.000310142	0.0158948	0.0143645	COL5A3/MMP11/COL4A2/COL18A1/COL5A1/COL4A1/COL8A1/COL5A2/COL4A5	9	CAF2 Up (679)	CAF2 Up (679)
REACTOME_SYNDECAN_INTERACTIONS	REACTOME_SYNDECAN_INTERACTIONS	4/116	27/9664	0.000279445	0.0169996	0.015541	CASK/FGF2/ITGA2/VTN	4	CAF1 Up (191)	CAF1 Up (191)
REACTOME_INTEGRIN_SIGNALING	REACTOME_INTEGRIN_SIGNALING	6/355	27/9664	0.000362051	0.0172197	0.0155618	FN1/BCAR1/PTK2/APBB1IP/RASGRP1/TLN1	6	CAF2 Up (679)	CAF2 Up (679)
REACTOME_NCAM_SIGNALING_FOR_NEURITE_OUT_GROWTH	REACTOME_NCAM_SIGNALING_FOR_NEURITE_OUT_GROWTH	9/355	62/9664	0.000398992	0.0172197	0.0155618	COL5A3/PTK2/COL4A2/COL5A1/COL4A1/NRAS/COL5A2/FYN/COL4A5	9	CAF2 Up (679)	CAF2 Up (679)
REACTOME_SEMAPHORIN_INTERACTIONS	REACTOME_SEMAPHORIN_INTERACTIONS	9/355	62/9664	0.000398992	0.0172197	0.0155618	CDK5R1/SEMA5A/PLXND1/MYH11/MYH9/SEMA6A/RHOB/FYN/TLN1	9	CAF2 Up (679)	CAF2 Up (679)
REACTOME_CHONDROITIN_SULFATE_DERMATAN_SULFATE_METABOLISM	REACTOME_CHONDROITIN_SULFATE_DERMATAN_SULFATE_METABOLISM	8/355	50/9664	0.000425987	0.0174655	0.0157839	SDC2/CHSY3/B3GALT6/CSPG4/CHST3/CHST7/GPC4/CHSY1	8	CAF2 Up (679)	CAF2 Up (679)
REACTOME_UNWINDING_OF_DNA	REACTOME_UNWINDING_OF_DNA	4/355	11/9664	0.000481223	0.0187906	0.0169815	MCM2/MCM5/GINS2/MCM3	4	CAF2 Up (679)	CAF2 Up (679)
REACTOME_LAMININ_INTERACTIONS	REACTOME_LAMININ_INTERACTIONS	4/116	30/9664	0.000424424	0.0193346	0.0176757	LAMA4/LAMA2/LAMB1/ITGA2	4	CAF1 Up (191)	CAF1 Up (191)
REACTOME_MET_ACTIVATES_PTK2_SIGNALING	REACTOME_MET_ACTIVATES_PTK2_SIGNALING	4/116	30/9664	0.000424424	0.0193346	0.0176757	LAMA4/LAMA2/LAMB1/ITGA2	4	CAF1 Up (191)	CAF1 Up (191)
REACTOME_COMPLEMENT_CASCADE	REACTOME_COMPLEMENT_CASCADE	5/116	56/9664	0.000535789	0.0193346	0.0176757	CFH/C1S/MASP1/C1R/VTN	5	CAF1 Up (191)	CAF1 Up (191)
REACTOME_CREATION_OF_C4_AND_C2_ACTIVATORS	REACTOME_CREATION_OF_C4_AND_C2_ACTIVATORS	3/116	14/9664	0.000556983	0.0193346	0.0176757	C1S/MASP1/C1R	3	CAF1 Up (191)	CAF1 Up (191)
REACTOME_REGULATION_OF_INSULIN_LIKE_GROWTH_FACTOR_IGF_TRANSPORT_AND_UPTAKE_BY_INSULIN_LIKE_GROWTH_FACTOR_BINDING_PROTEINS_IGFBPS	REACTOME_REGULATION_OF_INSULIN_LIKE_GROWTH_FACTOR_IGF_TRANSPORT_AND_UPTAKE_BY_INSULIN_LIKE_GROWTH_FACTOR_BINDING_PROTEINS_IGFBPS	7/116	120/9664	0.000582686	0.0193346	0.0176757	FAM20C/APP/IGFBP3/BMP4/LAMB1/GAS6/FAM20A	7	CAF1 Up (191)	CAF1 Up (191)
REACTOME_SIGNALING_BY_MET	REACTOME_SIGNALING_BY_MET	10/355	79/9664	0.000593738	0.0193784	0.0175127	COL5A3/FN1/PTK2/DOCK7/COL5A1/ITGA3/SH3KBP1/NRAS/COL5A2/SPINT2	10	CAF2 Up (679)	CAF2 Up (679)
REACTOME_CHONDROITIN_SULFATE_BIOSYNTHESIS	REACTOME_CHONDROITIN_SULFATE_BIOSYNTHESIS	5/355	20/9664	0.000638846	0.0193784	0.0175127	CHSY3/CSPG4/CHST3/CHST7/CHSY1	5	CAF2 Up (679)	CAF2 Up (679)
REACTOME_DISEASES_ASSOCIATED_WITH_GLYCOSAMINOGLYCAN_METABOLISM	REACTOME_DISEASES_ASSOCIATED_WITH_GLYCOSAMINOGLYCAN_METABOLISM	7/355	41/9664	0.000650105	0.0193784	0.0175127	ACAN/SDC2/B3GALT6/CSPG4/CHST3/GPC4/CHSY1	7	CAF2 Up (679)	CAF2 Up (679)
REACTOME_EPHB_MEDIATED_FORWARD_SIGNALING	REACTOME_EPHB_MEDIATED_FORWARD_SIGNALING	7/355	41/9664	0.000650105	0.0193784	0.0175127	EPHB1/ACTR2/SDC2/PTK2/ARPC5/FYN/ACTR3	7	CAF2 Up (679)	CAF2 Up (679)
REACTOME_MET_PROMOTES_CELL_MOTILITY	REACTOME_MET_PROMOTES_CELL_MOTILITY	7/355	41/9664	0.000650105	0.0193784	0.0175127	COL5A3/FN1/PTK2/DOCK7/COL5A1/ITGA3/COL5A2	7	CAF2 Up (679)	CAF2 Up (679)
REACTOME_LAMININ_INTERACTIONS	REACTOME_LAMININ_INTERACTIONS	6/355	30/9664	0.000661701	0.0193784	0.0175127	ITGA7/COL4A2/COL18A1/COL4A1/ITGA3/COL4A5	6	CAF2 Up (679)	CAF2 Up (679)
REACTOME_MET_ACTIVATES_PTK2_SIGNALING	REACTOME_MET_ACTIVATES_PTK2_SIGNALING	6/355	30/9664	0.000661701	0.0193784	0.0175127	COL5A3/FN1/PTK2/COL5A1/ITGA3/COL5A2	6	CAF2 Up (679)	CAF2 Up (679)
REACTOME_RHO_GTPASE_EFFECTORS	REACTOME_RHO_GTPASE_EFFECTORS	20/355	247/9664	0.000762714	0.0210302	0.0190055	YWHAH/ACTR2/CYFIP2/CLASP2/CALM1/PTK2/ARPC5/DIAPH3/PPP1R14A/SPC25/MYH11/NDE1/MYH9/TUBA3D/TUBA1C/MIS12/RHOB/NUF2/KIF2C/ACTR3	20	CAF2 Up (679)	CAF2 Up (679)
REACTOME_RESPONSE_TO_ELEVATED_PLATELET_CYTOSOLIC_CA2	REACTOME_RESPONSE_TO_ELEVATED_PLATELET_CYTOSOLIC_CA2	13/355	127/9664	0.000769397	0.0210302	0.0190055	PDGFA/CALM1/THBS1/FN1/CLEC3B/SERPINE1/ACTN4/TAGLN2/EGF/VEGFC/TLN1/ENDOD1/CD36	13	CAF2 Up (679)	CAF2 Up (679)
REACTOME_DNA_STRAND_ELONGATION	REACTOME_DNA_STRAND_ELONGATION	6/355	31/9664	0.000795477	0.0210417	0.0190158	MCM2/FEN1/MCM5/GINS2/RFC4/MCM3	6	CAF2 Up (679)	CAF2 Up (679)
REACTOME_METABOLISM_OF_STEROIDS	REACTOME_METABOLISM_OF_STEROIDS	12/212	145/9664	7.93422e-05	0.0221365	0.0208795	TBL1X/SREBF1/TM7SF2/SCD/ABCC3/HSD17B11/LSS/CYP27A1/AKR1C4/AKR1B1/CH25H/FASN	12	NAF Up (396)	NAF Up (396)
REACTOME_MOLECULES_ASSOCIATED_WITH_ELASTIC_FIBRES	REACTOME_MOLECULES_ASSOCIATED_WITH_ELASTIC_FIBRES	4/116	38/9664	0.0010618	0.0322964	0.0295255	FBLN5/FBLN1/BMP4/VTN	4	CAF1 Up (191)	CAF1 Up (191)
REACTOME_INSERTION_OF_TAIL_ANCHORED_PROTEINS_INTO_THE_ENDOPLASMIC_RETICULUM_MEMBRANE	REACTOME_INSERTION_OF_TAIL_ANCHORED_PROTEINS_INTO_THE_ENDOPLASMIC_RETICULUM_MEMBRANE	3/116	18/9664	0.00120565	0.0338511	0.0309468	PRNP/CYB5A/APP	3	CAF1 Up (191)	CAF1 Up (191)
REACTOME_MET_PROMOTES_CELL_MOTILITY	REACTOME_MET_PROMOTES_CELL_MOTILITY	4/116	41/9664	0.00141702	0.0369436	0.033774	LAMA4/LAMA2/LAMB1/ITGA2	4	CAF1 Up (191)	CAF1 Up (191)
REACTOME_ACTIVATION_OF_GENE_EXPRESSION_BY_SREBF_SREBP	REACTOME_ACTIVATION_OF_GENE_EXPRESSION_BY_SREBF_SREBP	6/212	40/9664	0.000213731	0.0397539	0.0374966	TBL1X/SREBF1/TM7SF2/SCD/LSS/FASN	6	NAF Up (396)	NAF Up (396)
REACTOME_EPH_EPHRIN_SIGNALING	REACTOME_EPH_EPHRIN_SIGNALING	10/355	90/9664	0.00165048	0.040618	0.0367074	EPHB1/ACTR2/SDC2/PTK2/ARPC5/MYH11/MYH9/FYN/EPHA2/ACTR3	10	CAF2 Up (679)	CAF2 Up (679)
REACTOME_SIGNALING_BY_NOTCH3	REACTOME_SIGNALING_BY_NOTCH3	7/355	48/9664	0.00170834	0.040618	0.0367074	HEYL/JAG1/NOTCH3/HEY2/PLXND1/STAT1/EGF	7	CAF2 Up (679)	CAF2 Up (679)
REACTOME_GRB2_SOS_PROVIDES_LINKAGE_TO_MAPK_SIGNALING_FOR_INTEGRINS	REACTOME_GRB2_SOS_PROVIDES_LINKAGE_TO_MAPK_SIGNALING_FOR_INTEGRINS	4/355	15/9664	0.00177112	0.040618	0.0367074	FN1/PTK2/APBB1IP/TLN1	4	CAF2 Up (679)	CAF2 Up (679)
REACTOME_SIGNALING_BY_BRAF_AND_RAF1_FUSIONS	REACTOME_SIGNALING_BY_BRAF_AND_RAF1_FUSIONS	8/355	62/9664	0.00183017	0.040618	0.0367074	MPRIP/CALM1/MAP2K1/FN1/APBB1IP/TRAK1/NRAS/TLN1	8	CAF2 Up (679)	CAF2 Up (679)
REACTOME_ACTIVATION_OF_AMPK_DOWNSTREAM_OF_NMDARS	REACTOME_ACTIVATION_OF_AMPK_DOWNSTREAM_OF_NMDARS	5/355	25/9664	0.0018823	0.040618	0.0367074	PRKAB2/CALM1/TUBA3D/TUBA1C/PRKAG2	5	CAF2 Up (679)	CAF2 Up (679)
REACTOME_NOTCH3_INTRACELLULAR_DOMAIN_REGULATES_TRANSCRIPTION	REACTOME_NOTCH3_INTRACELLULAR_DOMAIN_REGULATES_TRANSCRIPTION	5/355	25/9664	0.0018823	0.040618	0.0367074	HEYL/NOTCH3/HEY2/PLXND1/STAT1	5	CAF2 Up (679)	CAF2 Up (679)
REACTOME_SIGNALING_BY_NTRK2_TRKB	REACTOME_SIGNALING_BY_NTRK2_TRKB	5/355	25/9664	0.0018823	0.040618	0.0367074	NTF3/CDK5R1/NTRK2/NRAS/FYN	5	CAF2 Up (679)	CAF2 Up (679)
REACTOME_SIGNALING_BY_RETINOIC_ACID	REACTOME_SIGNALING_BY_RETINOIC_ACID	4/116	43/9664	0.00169531	0.0412525	0.0377131	ALDH1A1/DHRS3/RDH10/ALDH1A3	4	CAF1 Up (191)	CAF1 Up (191)
REACTOME_ELASTIC_FIBRE_FORMATION	REACTOME_ELASTIC_FIBRE_FORMATION	4/116	45/9664	0.00200946	0.0458408	0.0419078	FBLN5/FBLN1/BMP4/VTN	4	CAF1 Up (191)	CAF1 Up (191)
REACTOME_INITIAL_TRIGGERING_OF_COMPLEMENT	REACTOME_INITIAL_TRIGGERING_OF_COMPLEMENT	3/116	22/9664	0.00219725	0.0471762	0.0431286	C1S/MASP1/C1R	3	CAF1 Up (191)	CAF1 Up (191)
REACTOME_PLATELET_AGGREGATION_PLUG_FORMATION	REACTOME_PLATELET_AGGREGATION_PLUG_FORMATION	6/355	38/9664	0.00240259	0.0505161	0.0456525	FN1/BCAR1/PTK2/APBB1IP/RASGRP1/TLN1	6	CAF2 Up (679)	CAF2 Up (679)
REACTOME_MISCELLANEOUS_TRANSPORT_AND_BINDING_EVENTS	REACTOME_MISCELLANEOUS_TRANSPORT_AND_BINDING_EVENTS	3/116	23/9664	0.00250489	0.0507935	0.0464356	LRRC8D/NIPA1/CTNS	3	CAF1 Up (191)	CAF1 Up (191)
REACTOME_EFFECTS_OF_PIP2_HYDROLYSIS	REACTOME_EFFECTS_OF_PIP2_HYDROLYSIS	5/355	27/9664	0.00269295	0.0552055	0.0498905	PRKCH/TRPC6/RASGRP1/MGLL/DAGLB	5	CAF2 Up (679)	CAF2 Up (679)
REACTOME_GLYCOLYSIS	REACTOME_GLYCOLYSIS	8/355	68/9664	0.00330757	0.0661513	0.0597824	ENO1/TPI1/PFKFB4/ENO2/PGAM1/PFKP/PGK1/HK2	8	CAF2 Up (679)	CAF2 Up (679)
REACTOME_SIGNALING_BY_NTRKS	REACTOME_SIGNALING_BY_NTRKS	12/355	133/9664	0.00354306	0.0664962	0.0600941	NTF3/CDK5R1/NGF/ID4/MAP2K1/MEF2C/PTPRO/NTRK2/MEF2D/NRAS/RIT1/FYN	12	CAF2 Up (679)	CAF2 Up (679)
REACTOME_NCAM1_INTERACTIONS	REACTOME_NCAM1_INTERACTIONS	6/355	41/9664	0.003568	0.0664962	0.0600941	COL5A3/COL4A2/COL5A1/COL4A1/COL5A2/COL4A5	6	CAF2 Up (679)	CAF2 Up (679)
REACTOME_CROSSLINKING_OF_COLLAGEN_FIBRILS	REACTOME_CROSSLINKING_OF_COLLAGEN_FIBRILS	4/355	18/9664	0.00363889	0.0664962	0.0600941	COL4A2/LOXL3/COL4A1/COL4A5	4	CAF2 Up (679)	CAF2 Up (679)
REACTOME_RAC1_GTPASE_CYCLE	REACTOME_RAC1_GTPASE_CYCLE	14/355	169/9664	0.00372622	0.0664962	0.0600941	CYFIP2/JAG1/DLC1/DOCK5/DIAPH3/MCAM/DOCK7/ARHGAP24/ARHGDIB/ARHGDIA/PLEKHG2/PLEKHG3/ARHGEF6/EPHA2	14	CAF2 Up (679)	CAF2 Up (679)
REACTOME_DOWNSTREAM_SIGNAL_TRANSDUCTION	REACTOME_DOWNSTREAM_SIGNAL_TRANSDUCTION	5/355	29/9664	0.00373027	0.0664962	0.0600941	PDGFA/BCAR1/STAT1/PDGFRB/NRAS	5	CAF2 Up (679)	CAF2 Up (679)
REACTOME_SIGNALING_BY_NUCLEAR_RECEPTORS	REACTOME_SIGNALING_BY_NUCLEAR_RECEPTORS	14/212	228/9664	0.000488066	0.0680852	0.0642192	GNG2/TBL1X/DHRS3/SREBF1/ALDH1A3/S1PR3/ABCA1/SCD/PLTP/MYLIP/NR1H3/ALDH1A1/RARB/FASN	14	NAF Up (396)	NAF Up (396)
REACTOME_KERATAN_SULFATE_BIOSYNTHESIS	REACTOME_KERATAN_SULFATE_BIOSYNTHESIS	3/116	27/9664	0.00399541	0.0767539	0.0701687	B4GALT4/ST3GAL1/LUM	3	CAF1 Up (191)	CAF1 Up (191)
REACTOME_DISEASES_OF_GLYCOSYLATION	REACTOME_DISEASES_OF_GLYCOSYLATION	12/355	138/9664	0.0047772	0.083111	0.0751093	ACAN/SDC2/ADAMTS7/SEMA5B/THBS1/NOTCH3/B3GALT6/CSPG4/CHST3/SEMA5A/GPC4/CHSY1	12	CAF2 Up (679)	CAF2 Up (679)
REACTOME_P75NTR_REGULATES_AXONOGENESIS	REACTOME_P75NTR_REGULATES_AXONOGENESIS	3/355	10/9664	0.00486503	0.083111	0.0751093	NGF/LINGO1/ARHGDIA	3	CAF2 Up (679)	CAF2 Up (679)
REACTOME_RHO_GTPASES_ACTIVATE_PKNS	REACTOME_RHO_GTPASES_ACTIVATE_PKNS	5/355	31/9664	0.00502639	0.0836652	0.0756101	YWHAH/PPP1R14A/MYH11/MYH9/RHOB	5	CAF2 Up (679)	CAF2 Up (679)
REACTOME_PARASITE_INFECTION	REACTOME_PARASITE_INFECTION	7/355	58/9664	0.00510154	0.0836652	0.0756101	ACTR2/CYFIP2/PTK2/ARPC5/MYH9/FYN/ACTR3	7	CAF2 Up (679)	CAF2 Up (679)
REACTOME_UPTAKE_AND_ACTIONS_OF_BACTERIAL_TOXINS	REACTOME_UPTAKE_AND_ACTIONS_OF_BACTERIAL_TOXINS	3/116	29/9664	0.00490512	0.0895184	0.081838	ANTXR2/TXNRD1/ANTXR1	3	CAF1 Up (191)	CAF1 Up (191)
REACTOME_SYNTHESIS_OF_SUBSTRATES_IN_N_GLYCAN_BIOSYTHESIS	REACTOME_SYNTHESIS_OF_SUBSTRATES_IN_N_GLYCAN_BIOSYTHESIS	4/116	60/9664	0.00573131	0.0996155	0.0910689	SLC35C1/ST3GAL1/CTSA/ST3GAL5	4	CAF1 Up (191)	CAF1 Up (191)
REACTOME_FGFR2B_LIGAND_BINDING_AND_ACTIVATION	REACTOME_FGFR2B_LIGAND_BINDING_AND_ACTIVATION	2/116	10/9664	0.00603603	0.100143	0.0915512	FGF2/FGF7	2	CAF1 Up (191)	CAF1 Up (191)
REACTOME_KERATAN_SULFATE_KERATIN_METABOLISM	REACTOME_KERATAN_SULFATE_KERATIN_METABOLISM	3/116	33/9664	0.0070741	0.102758	0.0939419	B4GALT4/ST3GAL1/LUM	3	CAF1 Up (191)	CAF1 Up (191)
REACTOME_METABOLIC_DISORDERS_OF_BIOLOGICAL_OXIDATION_ENZYMES	REACTOME_METABOLIC_DISORDERS_OF_BIOLOGICAL_OXIDATION_ENZYMES	3/116	33/9664	0.0070741	0.102758	0.0939419	GCLM/CYP27A1/GCLC	3	CAF1 Up (191)	CAF1 Up (191)
REACTOME_SIALIC_ACID_METABOLISM	REACTOME_SIALIC_ACID_METABOLISM	3/116	33/9664	0.0070741	0.102758	0.0939419	ST3GAL1/CTSA/ST3GAL5	3	CAF1 Up (191)	CAF1 Up (191)
REACTOME_UPTAKE_AND_FUNCTION_OF_ANTHRAX_TOXINS	REACTOME_UPTAKE_AND_FUNCTION_OF_ANTHRAX_TOXINS	2/116	11/9664	0.00731976	0.102758	0.0939419	ANTXR2/ANTXR1	2	CAF1 Up (191)	CAF1 Up (191)
REACTOME_REGULATION_OF_CHOLESTEROL_BIOSYNTHESIS_BY_SREBP_SREBF	REACTOME_REGULATION_OF_CHOLESTEROL_BIOSYNTHESIS_BY_SREBP_SREBF	6/212	53/9664	0.00100891	0.112594	0.106201	TBL1X/SREBF1/TM7SF2/SCD/LSS/FASN	6	NAF Up (396)	NAF Up (396)
REACTOME_GLUTATHIONE_SYNTHESIS_AND_RECYCLING	REACTOME_GLUTATHIONE_SYNTHESIS_AND_RECYCLING	2/116	12/9664	0.0087152	0.117817	0.107708	GCLM/GCLC	2	CAF1 Up (191)	CAF1 Up (191)
REACTOME_INTERLEUKIN_7_SIGNALING	REACTOME_INTERLEUKIN_7_SIGNALING	4/212	23/9664	0.00143648	0.133592	0.126007	HGF/IRS1/IL7/SOCS2	4	NAF Up (396)	NAF Up (396)
REACTOME_BIOSYNTHESIS_OF_THE_N_GLYCAN_PRECURSOR_DOLICHOL_LIPID_LINKED_OLIGOSACCHARIDE_LLO_AND_TRANSFER_TO_A_NASCENT_PROTEIN	REACTOME_BIOSYNTHESIS_OF_THE_N_GLYCAN_PRECURSOR_DOLICHOL_LIPID_LINKED_OLIGOSACCHARIDE_LLO_AND_TRANSFER_TO_A_NASCENT_PROTEIN	4/116	75/9664	0.0124587	0.162409	0.148475	SLC35C1/ST3GAL1/CTSA/ST3GAL5	4	CAF1 Up (191)	CAF1 Up (191)
REACTOME_CREATION_OF_C4_AND_C2_ACTIVATORS	REACTOME_CREATION_OF_C4_AND_C2_ACTIVATORS	3/212	14/9664	0.00316856	0.17742	0.167346	MASP1/C1S/C1R	3	NAF Up (396)	NAF Up (396)
REACTOME_PENTOSE_PHOSPHATE_PATHWAY	REACTOME_PENTOSE_PHOSPHATE_PATHWAY	3/212	14/9664	0.00316856	0.17742	0.167346	TKT/PGD/G6PD	3	NAF Up (396)	NAF Up (396)
REACTOME_CGMP_EFFECTS	REACTOME_CGMP_EFFECTS	3/212	15/9664	0.00389718	0.17742	0.167346	PDE5A/PDE1A/KCNMA1	3	NAF Up (396)	NAF Up (396)
REACTOME_HEME_DEGRADATION	REACTOME_HEME_DEGRADATION	3/212	15/9664	0.00389718	0.17742	0.167346	HMOX1/BLVRB/BLVRA	3	NAF Up (396)	NAF Up (396)
REACTOME_MET_ACTIVATES_PTK2_SIGNALING	REACTOME_MET_ACTIVATES_PTK2_SIGNALING	4/212	30/9664	0.00394375	0.17742	0.167346	LAMA4/HGF/LAMA2/MET	4	NAF Up (396)	NAF Up (396)
REACTOME_NR1H3_NR1H2_REGULATE_GENE_EXPRESSION_LINKED_TO_CHOLESTEROL_TRANSPORT_AND_EFFLUX	REACTOME_NR1H3_NR1H2_REGULATE_GENE_EXPRESSION_LINKED_TO_CHOLESTEROL_TRANSPORT_AND_EFFLUX	4/212	30/9664	0.00394375	0.17742	0.167346	TBL1X/ABCA1/PLTP/NR1H3	4	NAF Up (396)	NAF Up (396)
REACTOME_REGULATION_OF_LIPID_METABOLISM_BY_PPARALPHA	REACTOME_REGULATION_OF_LIPID_METABOLISM_BY_PPARALPHA	8/212	117/9664	0.00414678	0.17742	0.167346	TBL1X/SREBF1/ABCA1/TXNRD1/PPARG/ME1/NR1H3/FADS1	8	NAF Up (396)	NAF Up (396)
REACTOME_FATTY_ACYL_COA_BIOSYNTHESIS	REACTOME_FATTY_ACYL_COA_BIOSYNTHESIS	4/212	31/9664	0.0044514	0.17742	0.167346	ELOVL5/SCD/ACSL3/FASN	4	NAF Up (396)	NAF Up (396)
REACTOME_SIGNALING_BY_MET	REACTOME_SIGNALING_BY_MET	4/116	79/9664	0.0148513	0.183571	0.167821	LAMA4/LAMA2/LAMB1/ITGA2	4	CAF1 Up (191)	CAF1 Up (191)
REACTOME_GLYCOSAMINOGLYCAN_METABOLISM	REACTOME_GLYCOSAMINOGLYCAN_METABOLISM	5/116	121/9664	0.015088	0.183571	0.167821	B4GALT4/GLCE/ST3GAL1/LUM/DCN	5	CAF1 Up (191)	CAF1 Up (191)
REACTOME_METABOLIC_DISORDERS_OF_BIOLOGICAL_OXIDATION_ENZYMES	REACTOME_METABOLIC_DISORDERS_OF_BIOLOGICAL_OXIDATION_ENZYMES	4/212	33/9664	0.00559499	0.208134	0.196315	GCLC/GCLM/TPMT/CYP27A1	4	NAF Up (396)	NAF Up (396)
REACTOME_INTEGRIN_CELL_SURFACE_INTERACTIONS	REACTOME_INTEGRIN_CELL_SURFACE_INTERACTIONS	4/116	84/9664	0.018226	0.214597	0.196185	ICAM1/LUM/ITGA2/VTN	4	CAF1 Up (191)	CAF1 Up (191)
REACTOME_PHOSPHOLIPASE_C_MEDIATED_CASCADE_FGFR2	REACTOME_PHOSPHOLIPASE_C_MEDIATED_CASCADE_FGFR2	2/116	18/9664	0.0192791	0.21862	0.199863	FGF2/FGF7	2	CAF1 Up (191)	CAF1 Up (191)
REACTOME_SIGNALING_BY_NUCLEAR_RECEPTORS	REACTOME_SIGNALING_BY_NUCLEAR_RECEPTORS	7/116	228/9664	0.0197656	0.21862	0.199863	ALDH1A1/S1PR3/DHRS3/RDH10/ABCA1/APOD/ALDH1A3	7	CAF1 Up (191)	CAF1 Up (191)
REACTOME_AMYLOID_FIBER_FORMATION	REACTOME_AMYLOID_FIBER_FORMATION	3/116	51/9664	0.0231167	0.241724	0.220984	APP/UBE2L6/SNCAIP	3	CAF1 Up (191)	CAF1 Up (191)
REACTOME_FGFR2_LIGAND_BINDING_AND_ACTIVATION	REACTOME_FGFR2_LIGAND_BINDING_AND_ACTIVATION	2/116	20/9664	0.0235719	0.241724	0.220984	FGF2/FGF7	2	CAF1 Up (191)	CAF1 Up (191)
REACTOME_DISEASES_OF_METABOLISM	REACTOME_DISEASES_OF_METABOLISM	7/116	237/9664	0.0238412	0.241724	0.220984	GCLM/ADAMTS5/CYP27A1/LUM/DCN/CTSA/GCLC	7	CAF1 Up (191)	CAF1 Up (191)
REACTOME_NITRIC_OXIDE_STIMULATES_GUANYLATE_CYCLASE	REACTOME_NITRIC_OXIDE_STIMULATES_GUANYLATE_CYCLASE	3/212	19/9664	0.00778126	0.271371	0.255962	PDE5A/PDE1A/KCNMA1	3	NAF Up (396)	NAF Up (396)
REACTOME_SLC_MEDIATED_TRANSMEMBRANE_TRANSPORT	REACTOME_SLC_MEDIATED_TRANSMEMBRANE_TRANSPORT	7/116	246/9664	0.0284644	0.280798	0.256706	SLC35C1/SLC31A1/SLC39A8/APOD/SLC15A3/SLC7A7/CTNS	7	CAF1 Up (191)	CAF1 Up (191)
REACTOME_IRON_UPTAKE_AND_TRANSPORT	REACTOME_IRON_UPTAKE_AND_TRANSPORT	5/212	58/9664	0.00865146	0.283971	0.267847	HMOX1/ATP6V0E2/ACO1/FTH1/STEAP2	5	NAF Up (396)	NAF Up (396)
REACTOME_PI_3K_CASCADE_FGFR2	REACTOME_PI_3K_CASCADE_FGFR2	2/116	23/9664	0.0306658	0.287001	0.262377	FGF2/FGF7	2	CAF1 Up (191)	CAF1 Up (191)
REACTOME_THE_CANONICAL_RETINOID_CYCLE_IN_RODS_TWILIGHT_VISION	REACTOME_THE_CANONICAL_RETINOID_CYCLE_IN_RODS_TWILIGHT_VISION	2/116	23/9664	0.0306658	0.287001	0.262377	RDH10/HSD17B6	2	CAF1 Up (191)	CAF1 Up (191)
REACTOME_MOLECULES_ASSOCIATED_WITH_ELASTIC_FIBRES	REACTOME_MOLECULES_ASSOCIATED_WITH_ELASTIC_FIBRES	4/212	38/9664	0.00927027	0.287378	0.271061	LTBP4/FBLN1/LTBP3/FBN2	4	NAF Up (396)	NAF Up (396)
REACTOME_BRANCHED_CHAIN_AMINO_ACID_CATABOLISM	REACTOME_BRANCHED_CHAIN_AMINO_ACID_CATABOLISM	3/212	21/9664	0.0103423	0.288551	0.272166	ACAT1/HIBADH/ALDH6A1	3	NAF Up (396)	NAF Up (396)
REACTOME_NEGATIVE_REGULATION_OF_MET_ACTIVITY	REACTOME_NEGATIVE_REGULATION_OF_MET_ACTIVITY	3/212	21/9664	0.0103423	0.288551	0.272166	HGF/MET/LRIG1	3	NAF Up (396)	NAF Up (396)
REACTOME_INITIAL_TRIGGERING_OF_COMPLEMENT	REACTOME_INITIAL_TRIGGERING_OF_COMPLEMENT	3/212	22/9664	0.0117847	0.293261	0.276609	MASP1/C1S/C1R	3	NAF Up (396)	NAF Up (396)
REACTOME_RA_BIOSYNTHESIS_PATHWAY	REACTOME_RA_BIOSYNTHESIS_PATHWAY	3/212	22/9664	0.0117847	0.293261	0.276609	DHRS3/ALDH1A3/ALDH1A1	3	NAF Up (396)	NAF Up (396)
REACTOME_MET_PROMOTES_CELL_MOTILITY	REACTOME_MET_PROMOTES_CELL_MOTILITY	4/212	41/9664	0.0120878	0.293261	0.276609	LAMA4/HGF/LAMA2/MET	4	NAF Up (396)	NAF Up (396)
REACTOME_INTERCONVERSION_OF_NUCLEOTIDE_DI_AND_TRIPHOSPHATES	REACTOME_INTERCONVERSION_OF_NUCLEOTIDE_DI_AND_TRIPHOSPHATES	2/116	24/9664	0.0331957	0.295522	0.270168	GLRX/TXNRD1	2	CAF1 Up (191)	CAF1 Up (191)
REACTOME_NICOTINATE_METABOLISM	REACTOME_NICOTINATE_METABOLISM	2/116	24/9664	0.0331957	0.295522	0.270168	PARP9/QPRT	2	CAF1 Up (191)	CAF1 Up (191)
REACTOME_FRS_MEDIATED_FGFR2_SIGNALING	REACTOME_FRS_MEDIATED_FGFR2_SIGNALING	2/116	25/9664	0.0358043	0.311156	0.28446	FGF2/FGF7	2	CAF1 Up (191)	CAF1 Up (191)
REACTOME_BILE_ACID_AND_BILE_SALT_METABOLISM	REACTOME_BILE_ACID_AND_BILE_SALT_METABOLISM	4/212	43/9664	0.0142405	0.317848	0.2998	ABCC3/CYP27A1/AKR1C4/CH25H	4	NAF Up (396)	NAF Up (396)
REACTOME_SIGNALING_BY_RETINOIC_ACID	REACTOME_SIGNALING_BY_RETINOIC_ACID	4/212	43/9664	0.0142405	0.317848	0.2998	DHRS3/ALDH1A3/ALDH1A1/RARB	4	NAF Up (396)	NAF Up (396)
REACTOME_METAL_ION_SLC_TRANSPORTERS	REACTOME_METAL_ION_SLC_TRANSPORTERS	2/116	26/9664	0.0384894	0.326712	0.298682	SLC31A1/SLC39A8	2	CAF1 Up (191)	CAF1 Up (191)
REACTOME_EGR2_AND_SOX10_MEDIATED_INITIATION_OF_SCHWANN_CELL_MYELINATION	REACTOME_EGR2_AND_SOX10_MEDIATED_INITIATION_OF_SCHWANN_CELL_MYELINATION	2/116	27/9664	0.0412489	0.342179	0.312821	LAMA2/LAMB1	2	CAF1 Up (191)	CAF1 Up (191)
REACTOME_ELASTIC_FIBRE_FORMATION	REACTOME_ELASTIC_FIBRE_FORMATION	4/212	45/9664	0.0166218	0.356729	0.336473	LTBP4/FBLN1/LTBP3/FBN2	4	NAF Up (396)	NAF Up (396)
REACTOME_TRANSLATION_OF_SARS_COV_1_STRUCTURAL_PROTEINS	REACTOME_TRANSLATION_OF_SARS_COV_1_STRUCTURAL_PROTEINS	2/116	29/9664	0.0469826	0.379847	0.347258	PARP9/ST3GAL1	2	CAF1 Up (191)	CAF1 Up (191)
REACTOME_DOWNSTREAM_SIGNALING_OF_ACTIVATED_FGFR2	REACTOME_DOWNSTREAM_SIGNALING_OF_ACTIVATED_FGFR2	2/116	30/9664	0.0499525	0.379847	0.347258	FGF2/FGF7	2	CAF1 Up (191)	CAF1 Up (191)
REACTOME_MEIOTIC_SYNAPSIS	REACTOME_MEIOTIC_SYNAPSIS	2/116	30/9664	0.0499525	0.379847	0.347258	HSPA2/TERF1	2	CAF1 Up (191)	CAF1 Up (191)
REACTOME_NR1H3_NR1H2_REGULATE_GENE_EXPRESSION_LINKED_TO_CHOLESTEROL_TRANSPORT_AND_EFFLUX	REACTOME_NR1H3_NR1H2_REGULATE_GENE_EXPRESSION_LINKED_TO_CHOLESTEROL_TRANSPORT_AND_EFFLUX	2/116	30/9664	0.0499525	0.379847	0.347258	ABCA1/APOD	2	CAF1 Up (191)	CAF1 Up (191)
REACTOME_KETONE_BODY_METABOLISM	REACTOME_KETONE_BODY_METABOLISM	2/212	10/9664	0.0191941	0.382511	0.360792	ACAT1/OXCT2	2	NAF Up (396)	NAF Up (396)
REACTOME_MET_RECEPTOR_RECYCLING	REACTOME_MET_RECEPTOR_RECYCLING	2/212	10/9664	0.0191941	0.382511	0.360792	HGF/MET	2	NAF Up (396)	NAF Up (396)
REACTOME_DOWNSTREAM_SIGNALING_OF_ACTIVATED_FGFR1	REACTOME_DOWNSTREAM_SIGNALING_OF_ACTIVATED_FGFR1	2/116	31/9664	0.0529886	0.390485	0.356983	FGF2/FLRT3	2	CAF1 Up (191)	CAF1 Up (191)
REACTOME_INTERFERON_ALPHA_BETA_SIGNALING	REACTOME_INTERFERON_ALPHA_BETA_SIGNALING	3/116	71/9664	0.0534911	0.390485	0.356983	IFI6/XAF1/GBP2	3	CAF1 Up (191)	CAF1 Up (191)
REACTOME_METABOLISM_OF_PORPHYRINS	REACTOME_METABOLISM_OF_PORPHYRINS	3/212	27/9664	0.0206634	0.397592	0.375016	HMOX1/BLVRB/BLVRA	3	NAF Up (396)	NAF Up (396)
REACTOME_MET_ACTIVATES_RAP1_AND_RAC1	REACTOME_MET_ACTIVATES_RAP1_AND_RAC1	2/212	11/9664	0.0231244	0.408551	0.385352	HGF/MET	2	NAF Up (396)	NAF Up (396)
REACTOME_MET_ACTIVATES_RAS_SIGNALING	REACTOME_MET_ACTIVATES_RAS_SIGNALING	2/212	11/9664	0.0231244	0.408551	0.385352	HGF/MET	2	NAF Up (396)	NAF Up (396)
REACTOME_FOXO_MEDIATED_TRANSCRIPTION_OF_OXIDATIVE_STRESS_METABOLIC_AND_NEURONAL_GENES	REACTOME_FOXO_MEDIATED_TRANSCRIPTION_OF_OXIDATIVE_STRESS_METABOLIC_AND_NEURONAL_GENES	3/212	29/9664	0.0250041	0.408551	0.385352	SREBF1/SMAD3/SOD2	3	NAF Up (396)	NAF Up (396)
REACTOME_UPTAKE_AND_ACTIONS_OF_BACTERIAL_TOXINS	REACTOME_UPTAKE_AND_ACTIONS_OF_BACTERIAL_TOXINS	3/212	29/9664	0.0250041	0.408551	0.385352	CD9/TXNRD1/ANTXR2	3	NAF Up (396)	NAF Up (396)
REACTOME_ETHANOL_OXIDATION	REACTOME_ETHANOL_OXIDATION	2/212	12/9664	0.0273536	0.408551	0.385352	ALDH1A1/ALDH2	2	NAF Up (396)	NAF Up (396)
REACTOME_GLUTATHIONE_SYNTHESIS_AND_RECYCLING	REACTOME_GLUTATHIONE_SYNTHESIS_AND_RECYCLING	2/212	12/9664	0.0273536	0.408551	0.385352	GCLC/GCLM	2	NAF Up (396)	NAF Up (396)
REACTOME_TRIGLYCERIDE_BIOSYNTHESIS	REACTOME_TRIGLYCERIDE_BIOSYNTHESIS	2/212	12/9664	0.0273536	0.408551	0.385352	LPIN1/GK	2	NAF Up (396)	NAF Up (396)
REACTOME_VLDLR_INTERNALISATION_AND_DEGRADATION	REACTOME_VLDLR_INTERNALISATION_AND_DEGRADATION	2/212	12/9664	0.0273536	0.408551	0.385352	MYLIP/NR1H3	2	NAF Up (396)	NAF Up (396)
REACTOME_FATTY_ACID_METABOLISM	REACTOME_FATTY_ACID_METABOLISM	8/212	164/9664	0.0279154	0.408551	0.385352	GPX4/ELOVL5/SCD/ACSL3/CROT/FADS1/PTGES/FASN	8	NAF Up (396)	NAF Up (396)
REACTOME_NUCLEAR_RECEPTOR_TRANSCRIPTION_PATHWAY	REACTOME_NUCLEAR_RECEPTOR_TRANSCRIPTION_PATHWAY	4/212	53/9664	0.0285546	0.408551	0.385352	NR2F1/PPARG/NR1H3/RARB	4	NAF Up (396)	NAF Up (396)
REACTOME_SIGNALING_BY_MET	REACTOME_SIGNALING_BY_MET	5/212	79/9664	0.0294999	0.411524	0.388157	LAMA4/HGF/LAMA2/MET/LRIG1	5	NAF Up (396)	NAF Up (396)
REACTOME_ALPHA_LINOLENIC_OMEGA3_AND_LINOLEIC_OMEGA6_ACID_METABOLISM	REACTOME_ALPHA_LINOLENIC_OMEGA3_AND_LINOLEIC_OMEGA6_ACID_METABOLISM	2/212	13/9664	0.031867	0.42214	0.39817	ELOVL5/FADS1	2	NAF Up (396)	NAF Up (396)
REACTOME_NF_KB_IS_ACTIVATED_AND_SIGNALS_SURVIVAL	REACTOME_NF_KB_IS_ACTIVATED_AND_SIGNALS_SURVIVAL	2/212	13/9664	0.031867	0.42214	0.39817	SQSTM1/NFKBIA	2	NAF Up (396)	NAF Up (396)
REACTOME_COMPLEMENT_CASCADE	REACTOME_COMPLEMENT_CASCADE	4/212	56/9664	0.0340614	0.42214	0.39817	MASP1/C1S/C1R/PROS1	4	NAF Up (396)	NAF Up (396)
REACTOME_PLATELET_HOMEOSTASIS	REACTOME_PLATELET_HOMEOSTASIS	5/212	83/9664	0.0354612	0.42214	0.39817	GNG2/PPP2R5A/PDE5A/PDE1A/KCNMA1	5	NAF Up (396)	NAF Up (396)
REACTOME_ASSEMBLY_OF_COLLAGEN_FIBRILS_AND_OTHER_MULTIMERIC_STRUCTURES	REACTOME_ASSEMBLY_OF_COLLAGEN_FIBRILS_AND_OTHER_MULTIMERIC_STRUCTURES	4/212	57/9664	0.0360249	0.42214	0.39817	PCOLCE/COL6A3/CTSB/COL14A1	4	NAF Up (396)	NAF Up (396)
REACTOME_EICOSANOID_LIGAND_BINDING_RECEPTORS	REACTOME_EICOSANOID_LIGAND_BINDING_RECEPTORS	2/212	14/9664	0.0366501	0.42214	0.39817	PTGER2/PTGER1	2	NAF Up (396)	NAF Up (396)
REACTOME_SEMA3A_PLEXIN_REPULSION_SIGNALING_BY_INHIBITING_INTEGRIN_ADHESION	REACTOME_SEMA3A_PLEXIN_REPULSION_SIGNALING_BY_INHIBITING_INTEGRIN_ADHESION	2/212	14/9664	0.0366501	0.42214	0.39817	NRP1/SEMA3A	2	NAF Up (396)	NAF Up (396)
REACTOME_SYNTHESIS_OF_BILE_ACIDS_AND_BILE_SALTS_VIA_24_HYDROXYCHOLESTEROL	REACTOME_SYNTHESIS_OF_BILE_ACIDS_AND_BILE_SALTS_VIA_24_HYDROXYCHOLESTEROL	2/212	14/9664	0.0366501	0.42214	0.39817	CYP27A1/AKR1C4	2	NAF Up (396)	NAF Up (396)
REACTOME_SYNTHESIS_OF_BILE_ACIDS_AND_BILE_SALTS	REACTOME_SYNTHESIS_OF_BILE_ACIDS_AND_BILE_SALTS	3/212	34/9664	0.0378262	0.42214	0.39817	CYP27A1/AKR1C4/CH25H	3	NAF Up (396)	NAF Up (396)
REACTOME_TRIGLYCERIDE_METABOLISM	REACTOME_TRIGLYCERIDE_METABOLISM	3/212	34/9664	0.0378262	0.42214	0.39817	LPIN1/ABHD5/GK	3	NAF Up (396)	NAF Up (396)
GOBP_ACTIN_FILAMENT_ORGANIZATION	GOBP_ACTIN_FILAMENT_ORGANIZATION	41/483	407/15048	8.27334e-11	2.9784e-07	2.58128e-07	DAAM2/MYO1B/MYO1E/ACTR2/CYFIP2/MICAL2/CLASP2/ESAM/ELN/MPRIP/DLC1/PLS3/FHOD1/BCAR1/ARPC5/DIAPH3/FMN2/SORBS2/RGS4/TMSB15A/NEDD9/ENAH/SEMA5A/EPS8/AIF1L/SHROOM3/MYO1D/CORO1C/PDXP/TPM1/FAT1/PLEKHG2/SH3KBP1/SYNPO2/CALD1/FCHSD2/ITGB5/SPIRE1/RHOB/ACTR3/STMN1	41	CAF2 Up (679)	CAF2 Up (679)
GOBP_MORPHOGENESIS_OF_AN_EPITHELIUM	GOBP_MORPHOGENESIS_OF_AN_EPITHELIUM	41/483	496/15048	2.87741e-08	4.44119e-05	3.84903e-05	PDGFA/FGF1/NTN4/FOXC2/HHIP/ANKRD6/ID4/MICAL2/TFAP2A/CLASP2/JAG1/DLC1/SOX11/FOXD1/EDN1/FOXE1/DACT1/HIF1A/ARHGAP24/PLXND1/FEM1B/MSN/PKD2/MEF2C/SHROOM3/SNAI2/PODXL/STAT1/RARA/COL5A1/HBEGF/FAT1/COL4A1/FZD2/CITED2/EGF/VEGFC/RHOB/GPC4/EPHA2/SPINT2	41	CAF2 Up (679)	CAF2 Up (679)
GOBP_CELL_ADHESION_MEDIATED_BY_INTEGRIN	GOBP_CELL_ADHESION_MEDIATED_BY_INTEGRIN	15/483	81/15048	3.70099e-08	4.44119e-05	3.84903e-05	FOXC2/ITGA11/PTK2/ITGA7/FBN1/SERPINE1/SNAI2/PODXL/ITGA3/ADA/ITGA10/ITGB5/EPHA2/ITGBL1/ITGA8	15	CAF2 Up (679)	CAF2 Up (679)
GOBP_HEART_MORPHOGENESIS	GOBP_HEART_MORPHOGENESIS	26/483	242/15048	7.16199e-08	6.44579e-05	5.58635e-05	HEYL/FOXC2/DSP/MICAL2/ANKRD1/JAG1/ELN/DLC1/SOX11/PTK2/EDN1/SMARCD3/HIF1A/CPE/SMAD7/PPP1R13L/HEY2/PLXND1/PKD2/MEF2C/SNAI2/TPM1/COL5A1/FZD2/CITED2/SLIT3	26	CAF2 Up (679)	CAF2 Up (679)
GOBP_MESENCHYMAL_CELL_DEVELOPMENT	GOBP_MESENCHYMAL_CELL_DEVELOPMENT	15/483	89/15048	1.37001e-07	8.87522e-05	7.69185e-05	HEYL/FOXC2/SEMA5B/JAG1/SOX11/FN1/EDN1/HIF1A/HEY2/SEMA5A/SNAI2/CORO1C/ANXA6/CITED2/SEMA6A	15	CAF2 Up (679)	CAF2 Up (679)
GOBP_INTEGRIN_MEDIATED_SIGNALING_PATHWAY	GOBP_INTEGRIN_MEDIATED_SIGNALING_PATHWAY	16/483	102/15048	1.4792e-07	8.87522e-05	7.69185e-05	FN1/ITGA11/BCAR1/PTK2/ITGA7/NEDD9/MYH9/LOXL3/ITGA3/ITGA10/LIMS2/ITGB5/TLN1/ITGBL1/ITGA8/LIMS1	16	CAF2 Up (679)	CAF2 Up (679)
GOBP_GLAND_DEVELOPMENT	GOBP_GLAND_DEVELOPMENT	28/303	422/15048	3.26843e-08	0.000102825	8.38783e-05	SFRP1/MDK/HMOX1/ACAT1/ALDH1A3/SMAD3/TGFBR3/TAF10/FOXF1/GATA2/LY6E/SOD2/HGF/SIX4/HOXA13/TGFBR2/TCF21/HOXA5/MET/ISL1/NRP1/NKX3-1/SERPINF1/ASS1/FASN/TBX3/SOCS2/SEMA3A	28	NAF Up (396)	NAF Up (396)
GOBP_AMEBOIDAL_TYPE_CELL_MIGRATION	GOBP_AMEBOIDAL_TYPE_CELL_MIGRATION	36/483	447/15048	3.92514e-07	0.000184925	0.000160268	DAAM2/FGF1/FOXC2/SYDE1/KIT/SEMA5B/CLASP2/THBS1/DOCK5/FN1/BCAR1/PTK2/EDN1/HIF1A/ZEB2/SASH1/SEMA5A/PLXND1/ETS1/CDH13/MYH9/MEF2C/LGMN/RHOJ/STAT1/ARHGDIB/CORO1C/HBEGF/ANXA6/ITGA3/EGF/VEGFC/SEMA6A/RHOB/EPHA2/SCG2	36	CAF2 Up (679)	CAF2 Up (679)
GOBP_CARDIAC_VENTRICLE_MORPHOGENESIS	GOBP_CARDIAC_VENTRICLE_MORPHOGENESIS	13/483	72/15048	4.10944e-07	0.000184925	0.000160268	HEYL/FOXC2/DSP/JAG1/SOX11/SMARCD3/HIF1A/CPE/SMAD7/PPP1R13L/HEY2/MEF2C/TPM1	13	CAF2 Up (679)	CAF2 Up (679)
GOBP_TISSUE_MIGRATION	GOBP_TISSUE_MIGRATION	30/483	340/15048	5.63896e-07	0.000222269	0.000192634	DAAM2/FGF1/FOXC2/KIT/CLASP2/THBS1/DOCK5/BCAR1/PTK2/EDN1/HIF1A/ZEB2/SASH1/SEMA5A/PLXND1/ETS1/CDH13/MYH9/MEF2C/LGMN/RHOJ/STAT1/CORO1C/HBEGF/ITGA3/EGF/VEGFC/RHOB/EPHA2/SCG2	30	CAF2 Up (679)	CAF2 Up (679)
GOBP_RESPONSE_TO_TRANSFORMING_GROWTH_FACTOR_BETA	GOBP_RESPONSE_TO_TRANSFORMING_GROWTH_FACTOR_BETA	25/483	253/15048	6.33052e-07	0.000222269	0.000192634	PDGFA/PDE3A/ZFHX3/ANKRD1/THBS1/LRRC32/SOX11/PTK2/EDN1/PMEPA1/ZEB2/SMAD7/CLEC3B/COL4A2/FBN1/MEF2C/ITGA3/CITED2/CAV2/ITGB5/SNX25/FYN/HTRA1/ITGA8/LIMS1	25	CAF2 Up (679)	CAF2 Up (679)
GOBP_CELL_SUBSTRATE_ADHESION	GOBP_CELL_SUBSTRATE_ADHESION	30/483	343/15048	6.79157e-07	0.000222269	0.000192634	EPHB1/COL5A3/NTN4/CLASP2/JAG1/DLC1/THBS1/DOCK5/FN1/ITGA11/PTK2/AXL/ITGA7/NEDD9/CDH13/SERPINE1/PTPRO/ACTN4/CORO1C/ITGA3/COL8A1/EDIL3/ITGA10/LIMS2/ITGB5/ECM2/ITGBL1/CD36/ITGA8/LIMS1	30	CAF2 Up (679)	CAF2 Up (679)
GOBP_CARDIAC_VENTRICLE_DEVELOPMENT	GOBP_CARDIAC_VENTRICLE_DEVELOPMENT	16/483	120/15048	1.4235e-06	0.00042705	0.00037011	HEYL/FOXC2/DSP/JAG1/SOX11/SMARCD3/HIF1A/CPE/SMAD7/PPP1R13L/HEY2/MEF2C/TPM1/FZD2/CITED2/SLIT3	16	CAF2 Up (679)	CAF2 Up (679)
GOBP_UROGENITAL_SYSTEM_DEVELOPMENT	GOBP_UROGENITAL_SYSTEM_DEVELOPMENT	29/483	340/15048	1.73773e-06	0.000457696	0.00039667	HEYL/PDGFA/CRIP1/FGF1/FOXC2/MYO1E/ID4/TFAP2A/JAG1/NOTCH3/SOX11/FOXD1/SMAD7/PLXND1/FBN1/FEM1B/PKD2/FADD/MEF2C/PODXL/PTPRO/STAT1/RARA/TIPARP/COL4A1/ITGA3/PDGFRB/AGTR1/ITGA8	29	CAF2 Up (679)	CAF2 Up (679)
GOBP_CARDIAC_CHAMBER_MORPHOGENESIS	GOBP_CARDIAC_CHAMBER_MORPHOGENESIS	16/483	122/15048	1.77993e-06	0.000457696	0.00039667	HEYL/FOXC2/DSP/JAG1/SOX11/SMARCD3/HIF1A/CPE/SMAD7/PPP1R13L/HEY2/MEF2C/TPM1/FZD2/CITED2/SLIT3	16	CAF2 Up (679)	CAF2 Up (679)
GOBP_NEURAL_CREST_CELL_DIFFERENTIATION	GOBP_NEURAL_CREST_CELL_DIFFERENTIATION	14/483	96/15048	2.1925e-06	0.0005262	0.00045604	FOXC2/SEMA5B/JAG1/SOX11/FN1/EDN1/HIF1A/SEMA5A/MEF2C/SNAI2/CORO1C/ANXA6/CITED2/SEMA6A	14	CAF2 Up (679)	CAF2 Up (679)
GOBP_REGULATION_OF_CELL_SHAPE	GOBP_REGULATION_OF_CELL_SHAPE	17/483	140/15048	2.51556e-06	0.00054074	0.000468641	KIT/DLC1/FGD4/FN1/PTK2/ITGA7/EPS8/PLXND1/MYH9/MSN/SHROOM3/RHOJ/TPM1/ATP10A/SH3KBP1/RHOB/FYN	17	CAF2 Up (679)	CAF2 Up (679)
GOBP_ADP_METABOLIC_PROCESS	GOBP_ADP_METABOLIC_PROCESS	13/483	84/15048	2.55349e-06	0.00054074	0.000468641	LDHA/HIF1A/ENO1/TPI1/ENO2/PGAM1/AK5/PFKP/PGK1/PRKAG2/SLC2A6/HK2/PGAM4	13	CAF2 Up (679)	CAF2 Up (679)
GOBP_MULTI_MULTICELLULAR_ORGANISM_PROCESS	GOBP_MULTI_MULTICELLULAR_ORGANISM_PROCESS	13/159	203/15048	2.39249e-07	0.000594296	0.000494365	RGS2/FBLN1/PSG5/TGFBR2/CTSB/ADM/PRDM1/PSG6/ITGA2/PSG1/PSG3/PSG9/PSG4	13	CAF1 Up (191)	CAF1 Up (191)
GOBP_CARDIAC_CHAMBER_DEVELOPMENT	GOBP_CARDIAC_CHAMBER_DEVELOPMENT	11/159	158/15048	9.16565e-07	0.000614803	0.000511424	LMO4/DHRS3/SOX4/HEG1/WNT2/BMP4/TGFBR2/PRDM1/PTK7/FOXF1/SEMA3C	11	CAF1 Up (191)	CAF1 Up (191)
GOBP_RESPIRATORY_SYSTEM_DEVELOPMENT	GOBP_RESPIRATORY_SYSTEM_DEVELOPMENT	12/159	192/15048	9.16639e-07	0.000614803	0.000511424	RDH10/HEG1/ASS1/WNT2/FGF2/BMP4/TGFBR2/PDPN/FGF7/ALDH1A3/PTK7/FOXF1	12	CAF1 Up (191)	CAF1 Up (191)
GOBP_CARDIAC_SEPTUM_DEVELOPMENT	GOBP_CARDIAC_SEPTUM_DEVELOPMENT	9/159	99/15048	1.00598e-06	0.000614803	0.000511424	LMO4/DHRS3/SOX4/HEG1/BMP4/TGFBR2/PRDM1/PTK7/SEMA3C	9	CAF1 Up (191)	CAF1 Up (191)
GOBP_MORPHOGENESIS_OF_AN_EPITHELIUM	GOBP_MORPHOGENESIS_OF_AN_EPITHELIUM	19/159	496/15048	1.23753e-06	0.000614803	0.000511424	LMO4/RDH10/TGM2/SOX4/PRICKLE2/WNT2/PRICKLE1/FGF2/BMP4/TGFBR2/ACVRL1/ADM/PDPN/FGF7/ALDH1A3/PTK7/FOXF1/FLRT3/SEMA3C	19	CAF1 Up (191)	CAF1 Up (191)
GOBP_MESENCHYME_DEVELOPMENT	GOBP_MESENCHYME_DEVELOPMENT	21/303	288/15048	3.92869e-07	0.000617983	0.000504113	SFRP1/MDK/EPHA4/SMAD3/TGFBR3/FOXF1/BNC2/HGF/KITLG/SIX4/SEMA3B/SEMA4B/TGFBR2/TCF21/HOXA5/ISL1/NRP1/OSR1/TBX3/SEMA3A/HTR2B	21	NAF Up (396)	NAF Up (396)
GOBP_MUSCLE_TISSUE_DEVELOPMENT	GOBP_MUSCLE_TISSUE_DEVELOPMENT	30/483	374/15048	4.0386e-06	0.000807721	0.000700024	HEYL/EPHB1/FOXC2/DSP/VGLL4/ANKRD1/ELN/SOX11/EDN1/ITGA7/HMG20B/SMAD7/PPP1R13L/HEY2/PDLIM5/SORBS2/RGS4/MYH11/PKD2/MEF2C/MYOZ1/RARA/TIPARP/TPM1/MEF2D/CITED2/CSRP2/CAV2/PDGFRB/ITGA8	30	CAF2 Up (679)	CAF2 Up (679)
GOBP_RESPONSE_TO_OXYGEN_LEVELS	GOBP_RESPONSE_TO_OXYGEN_LEVELS	26/483	300/15048	4.47769e-06	0.000848404	0.000735283	PDGFA/KCNMB1/CRYAB/THBS1/SLC29A1/EDN1/BNIP3/HIF1A/ENDOG/ENO1/FMN2/STC2/PLOD1/ACTN4/PDK3/OXTR/CITED2/PGK1/PDGFRB/ADA/DDAH1/ANGPTL4/VEGFC/SLC2A1/ATP1B1/HK2	26	CAF2 Up (679)	CAF2 Up (679)
GOBP_REGULATION_OF_CELL_MORPHOGENESIS	GOBP_REGULATION_OF_CELL_MORPHOGENESIS	25/483	283/15048	4.87926e-06	0.000878267	0.000761164	ACTR2/KIT/DLC1/FGD4/DOCK5/FN1/PTK2/OSTN/ITGA7/NEDD9/EPS8/PLXND1/MYH9/MSN/SHROOM3/RHOJ/ACTN4/CORO1C/TPM1/ATP10A/SH3KBP1/LIMS2/RHOB/FYN/LIMS1	25	CAF2 Up (679)	CAF2 Up (679)
GOBP_POSITIVE_REGULATION_OF_EPITHELIAL_CELL_MIGRATION	GOBP_POSITIVE_REGULATION_OF_EPITHELIAL_CELL_MIGRATION	18/483	164/15048	5.50337e-06	0.000943436	0.000817644	FGF1/FOXC2/CLASP2/THBS1/DOCK5/BCAR1/EDN1/HIF1A/SASH1/SEMA5A/ETS1/LGMN/RHOJ/HBEGF/ITGA3/EGF/VEGFC/RHOB	18	CAF2 Up (679)	CAF2 Up (679)
GOBP_OUTFLOW_TRACT_MORPHOGENESIS	GOBP_OUTFLOW_TRACT_MORPHOGENESIS	12/483	78/15048	6.6089e-06	0.00103976	0.000901126	HEYL/FOXC2/JAG1/ELN/SOX11/EDN1/HIF1A/HEY2/PLXND1/MEF2C/FZD2/CITED2	12	CAF2 Up (679)	CAF2 Up (679)
GOBP_MESENCHYME_DEVELOPMENT	GOBP_MESENCHYME_DEVELOPMENT	25/483	288/15048	6.64292e-06	0.00103976	0.000901126	HEYL/FOXC2/SEMA5B/CLASP2/JAG1/MARK1/SOX11/FN1/FOXD1/EDN1/HIF1A/SMAD7/HEY2/SEMA5A/PKD2/MEF2C/LOXL3/SNAI2/STAT1/CORO1C/ANXA6/CITED2/PDGFRB/SEMA6A/LIMS1	25	CAF2 Up (679)	CAF2 Up (679)
GOBP_NUCLEOTIDE_PHOSPHORYLATION	GOBP_NUCLEOTIDE_PHOSPHORYLATION	13/483	92/15048	7.21253e-06	0.00108188	0.000937629	LDHA/HIF1A/ENO1/TPI1/ENO2/PGAM1/AK5/PFKP/PGK1/PRKAG2/SLC2A6/HK2/PGAM4	13	CAF2 Up (679)	CAF2 Up (679)
GOBP_REGULATION_OF_CELL_SUBSTRATE_ADHESION	GOBP_REGULATION_OF_CELL_SUBSTRATE_ADHESION	20/483	201/15048	7.55038e-06	0.00108725	0.000942287	CLASP2/JAG1/DLC1/THBS1/DOCK5/FN1/PTK2/NEDD9/CDH13/SERPINE1/PTPRO/ACTN4/CORO1C/ITGA3/COL8A1/EDIL3/LIMS2/ECM2/CD36/LIMS1	20	CAF2 Up (679)	CAF2 Up (679)
GOBP_MESENCHYMAL_CELL_DIFFERENTIATION	GOBP_MESENCHYMAL_CELL_DIFFERENTIATION	22/483	237/15048	8.23781e-06	0.00113065	0.000979895	HEYL/FOXC2/SEMA5B/CLASP2/JAG1/MARK1/SOX11/FN1/EDN1/HIF1A/SMAD7/HEY2/SEMA5A/MEF2C/LOXL3/SNAI2/STAT1/CORO1C/ANXA6/CITED2/SEMA6A/LIMS1	22	CAF2 Up (679)	CAF2 Up (679)
GOBP_ACTIN_FILAMENT_BUNDLE_ORGANIZATION	GOBP_ACTIN_FILAMENT_BUNDLE_ORGANIZATION	17/483	153/15048	8.47986e-06	0.00113065	0.000979895	MYO1B/CLASP2/ELN/DLC1/PLS3/FHOD1/FMN2/NEDD9/EPS8/AIF1L/PDXP/TPM1/SYNPO2/CALD1/ITGB5/SPIRE1/STMN1	17	CAF2 Up (679)	CAF2 Up (679)
GOBP_REGULATION_OF_CELL_DEVELOPMENT	GOBP_REGULATION_OF_CELL_DEVELOPMENT	34/483	470/15048	8.86546e-06	0.00113984	0.000987865	HEYL/DAAM2/PDE3A/TRIM32/CDK5R1/YWHAH/NGF/ACTR2/KIT/ID4/SEMA5B/PRKCH/MAP2K1/DOCK5/SOX11/FN1/SMARCD3/HIF1A/SMAD7/HEY2/NEDD9/SEMA5A/DOCK7/PLXND1/FBN1/SPEN/NTRK2/ACTN4/CORO1C/SPP1/LIMS2/VEGFC/SEMA6A/LIMS1	34	CAF2 Up (679)	CAF2 Up (679)
GOBP_EXTERNAL_ENCAPSULATING_STRUCTURE_ORGANIZATION	GOBP_EXTERNAL_ENCAPSULATING_STRUCTURE_ORGANIZATION	25/483	295/15048	1.00927e-05	0.00125289	0.00108584	COL5A3/NTN4/FOXC2/MYO1E/ADAMTS7/CLASP2/ELN/MMP11/COL22A1/COL4A2/OLFML2B/MYH11/LOXL3/COL18A1/TGM1/COL5A1/COL4A1/COL8A1/CAV2/P4HA1/ECM2/COL5A2/SPINT2/ITGA8/COL4A5	25	CAF2 Up (679)	CAF2 Up (679)
GOBP_CELL_SUBSTRATE_ADHESION	GOBP_CELL_SUBSTRATE_ADHESION	15/159	343/15048	3.58284e-06	0.0014833	0.00123388	FBLN5/TYRO3/CASK/FBLN1/LIMCH1/ACVRL1/APOD/LAMB1/GAS6/PDPN/ITGA2/ANTXR1/FOXF1/PTPRK/VTN	15	CAF1 Up (191)	CAF1 Up (191)
GOBP_CORONARY_VASCULATURE_DEVELOPMENT	GOBP_CORONARY_VASCULATURE_DEVELOPMENT	6/159	42/15048	4.84959e-06	0.00156249	0.00129976	PRICKLE1/FGF2/BMP4/PRDM1/PTK7/SGCD	6	CAF1 Up (191)	CAF1 Up (191)
GOBP_CARDIAC_VENTRICLE_DEVELOPMENT	GOBP_CARDIAC_VENTRICLE_DEVELOPMENT	9/159	120/15048	5.03217e-06	0.00156249	0.00129976	LMO4/SOX4/HEG1/BMP4/TGFBR2/PRDM1/PTK7/FOXF1/SEMA3C	9	CAF1 Up (191)	CAF1 Up (191)
GOBP_CARDIAC_CHAMBER_DEVELOPMENT	GOBP_CARDIAC_CHAMBER_DEVELOPMENT	17/483	158/15048	1.30294e-05	0.00156353	0.00135506	HEYL/FOXC2/DSP/JAG1/SOX11/SMARCD3/HIF1A/CPE/SMAD7/PPP1R13L/HEY2/PLXND1/MEF2C/TPM1/FZD2/CITED2/SLIT3	17	CAF2 Up (679)	CAF2 Up (679)
GOBP_WOUND_HEALING	GOBP_WOUND_HEALING	16/159	404/15048	5.95165e-06	0.00164265	0.00136644	SCARB1/AK3/TYRO3/CASK/FGF2/FBLN1/TGFBR2/IL6ST/ACVRL1/GAS6/PDPN/NFE2L2/ITGA2/F3/PTK7/VTN	16	CAF1 Up (191)	CAF1 Up (191)
GOBP_CHONDROITIN_SULFATE_BIOSYNTHETIC_PROCESS	GOBP_CHONDROITIN_SULFATE_BIOSYNTHETIC_PROCESS	6/483	18/15048	1.41641e-05	0.00164486	0.00142555	CHSY3/B3GALT6/CHST3/CHST7/UGDH/CHSY1	6	CAF2 Up (679)	CAF2 Up (679)
GOBP_VENTRICULAR_SEPTUM_DEVELOPMENT	GOBP_VENTRICULAR_SEPTUM_DEVELOPMENT	7/159	68/15048	7.27319e-06	0.00180666	0.00150287	LMO4/SOX4/HEG1/BMP4/TGFBR2/PRDM1/PTK7	7	CAF1 Up (191)	CAF1 Up (191)
GOBP_MORPHOGENESIS_OF_A_BRANCHING_STRUCTURE	GOBP_MORPHOGENESIS_OF_A_BRANCHING_STRUCTURE	11/159	198/15048	8.2206e-06	0.00185636	0.00154421	RDH10/TGM2/WNT2/FGF2/BMP4/TGFBR2/ADM/PRDM1/FGF7/FOXF1/SEMA3C	11	CAF1 Up (191)	CAF1 Up (191)
GOBP_REGULATION_OF_ACTIN_FILAMENT_BASED_PROCESS	GOBP_REGULATION_OF_ACTIN_FILAMENT_BASED_PROCESS	28/483	362/15048	1.66349e-05	0.00187143	0.00162191	PDGFA/DAAM2/NTF3/DSP/CDK5R1/CYFIP2/CLASP2/ESAM/ELN/DLC1/FHOD1/ARPC5/EDN1/RGS4/TMSB15A/SEMA5A/EPS8/MYH9/ARHGDIB/PDXP/TPM1/ARHGDIA/PLEKHG2/PDGFRB/SYNPO2/FCHSD2/RHOB/STMN1	28	CAF2 Up (679)	CAF2 Up (679)
GOBP_PYRUVATE_METABOLIC_PROCESS	GOBP_PYRUVATE_METABOLIC_PROCESS	13/483	100/15048	1.8189e-05	0.00193851	0.00168004	LDHA/HIF1A/ENO1/TPI1/PDK3/ENO2/PGAM1/PFKP/PGK1/PRKAG2/SLC2A6/HK2/PGAM4	13	CAF2 Up (679)	CAF2 Up (679)
GOBP_WOUND_HEALING	GOBP_WOUND_HEALING	30/483	404/15048	1.83082e-05	0.00193851	0.00168004	PDGFA/FGF1/FOXC2/DSP/DYSF/TLR4/CLASP2/ENTPD1/THBS1/CD59/PEAR1/FN1/PTK2/EDN1/AXL/HIF1A/MCAM/ARHGAP24/SERPINE1/MYH9/MYOZ1/SERPINB2/TPM1/COL5A1/HBEGF/ANXA6/PDGFRB/MYOF/TLN1/CD36	30	CAF2 Up (679)	CAF2 Up (679)
GOBP_REGULATION_OF_NERVOUS_SYSTEM_DEVELOPMENT	GOBP_REGULATION_OF_NERVOUS_SYSTEM_DEVELOPMENT	30/483	410/15048	2.42238e-05	0.00249159	0.00215938	HEYL/EPHB1/DAAM2/TRIM32/CDK5R1/YWHAH/NGF/ACTR2/KIT/ID4/SEMA5B/MTMR2/PRKCH/MAP2K1/SOX11/FN1/SMARCD3/HIF1A/HEY2/SEMA5A/DOCK7/PLXND1/SPEN/NTRK2/RARA/OXTR/IL1RAP/SPP1/VEGFC/SEMA6A	30	CAF2 Up (679)	CAF2 Up (679)
GOBP_LUNG_MORPHOGENESIS	GOBP_LUNG_MORPHOGENESIS	6/159	49/15048	1.21629e-05	0.00251772	0.00209437	RDH10/WNT2/BMP4/TGFBR2/FGF7/FOXF1	6	CAF1 Up (191)	CAF1 Up (191)
GOBP_MORPHOGENESIS_OF_A_BRANCHING_STRUCTURE	GOBP_MORPHOGENESIS_OF_A_BRANCHING_STRUCTURE	16/303	198/15048	2.60344e-06	0.00273014	0.00222708	SFRP1/MDK/FOXF1/SLIT2/HGF/SIX4/HOXA13/TGFBR2/TCF21/EYA1/HOXA5/MET/NRP1/NKX3-1/TBX3/SEMA3A	16	NAF Up (396)	NAF Up (396)
GOBP_ENDOTHELIAL_CELL_MIGRATION	GOBP_ENDOTHELIAL_CELL_MIGRATION	22/483	256/15048	2.76106e-05	0.00276106	0.00239292	FGF1/FOXC2/THBS1/BCAR1/PTK2/EDN1/HIF1A/SASH1/SEMA5A/PLXND1/ETS1/CDH13/MYH9/MEF2C/LGMN/RHOJ/STAT1/EGF/VEGFC/RHOB/EPHA2/SCG2	22	CAF2 Up (679)	CAF2 Up (679)
GOBP_NEGATIVE_REGULATION_OF_EXTRINSIC_APOPTOTIC_SIGNALING_PATHWAY	GOBP_NEGATIVE_REGULATION_OF_EXTRINSIC_APOPTOTIC_SIGNALING_PATHWAY	11/303	96/15048	3.54759e-06	0.00279018	0.00227606	LGALS3/STRADB/HMOX1/HGF/GCLC/GCLM/EYA2/EYA1/FAIM2/NRP1/IL7	11	NAF Up (396)	NAF Up (396)
GOBP_REGULATION_OF_CYTOSKELETON_ORGANIZATION	GOBP_REGULATION_OF_CYTOSKELETON_ORGANIZATION	33/483	477/15048	2.97442e-05	0.00288936	0.00250411	PDGFA/DAAM2/NTF3/CDK5R1/SYDE1/CYFIP2/CLASP2/ESAM/ELN/DLC1/FHOD1/PTK2/ARPC5/EDN1/CDK2AP2/RGS4/TMSB15A/SEMA5A/EPS8/TPX2/ARHGDIB/PDXP/TPM1/ARHGDIA/PLEKHG2/AFAP1/PDGFRB/SYNPO2/FCHSD2/GPSM2/RHOB/NES/STMN1	33	CAF2 Up (679)	CAF2 Up (679)
GOBP_SPINDLE_LOCALIZATION	GOBP_SPINDLE_LOCALIZATION	9/483	51/15048	3.07451e-05	0.00288936	0.00250411	ACTR2/CLASP2/FMN2/NDE1/MYH9/GPSM2/SPIRE1/NUSAP1/ACTR3	9	CAF2 Up (679)	CAF2 Up (679)
GOBP_REGULATION_OF_CELLULAR_RESPONSE_TO_GROWTH_FACTOR_STIMULUS	GOBP_REGULATION_OF_CELLULAR_RESPONSE_TO_GROWTH_FACTOR_STIMULUS	24/483	296/15048	3.13014e-05	0.00288936	0.00250411	ZNF423/FGF1/HHIP/CYFIP2/THBS1/SOX11/FOXD1/PMEPA1/HIF1A/ZEB2/SMAD7/FBN1/SCUBE3/ITGA3/CITED2/SHISA2/CAV2/SNX25/VEGFC/SEMA6A/CRIM1/HTRA1/ITGA8/FSTL3	24	CAF2 Up (679)	CAF2 Up (679)
GOBP_RIBONUCLEOSIDE_DIPHOSPHATE_METABOLIC_PROCESS	GOBP_RIBONUCLEOSIDE_DIPHOSPHATE_METABOLIC_PROCESS	13/483	106/15048	3.41785e-05	0.00304703	0.00264076	LDHA/HIF1A/ENO1/TPI1/ENO2/PGAM1/AK5/PFKP/PGK1/PRKAG2/SLC2A6/HK2/PGAM4	13	CAF2 Up (679)	CAF2 Up (679)
GOBP_CELL_MATRIX_ADHESION	GOBP_CELL_MATRIX_ADHESION	20/483	223/15048	3.47023e-05	0.00304703	0.00264076	COL5A3/CLASP2/JAG1/DLC1/THBS1/FN1/ITGA11/PTK2/ITGA7/CDH13/SERPINE1/CORO1C/ITGA3/ITGA10/ITGB5/ECM2/ITGBL1/CD36/ITGA8/LIMS1	20	CAF2 Up (679)	CAF2 Up (679)
GOBP_NUCLEOSIDE_DIPHOSPHATE_METABOLIC_PROCESS	GOBP_NUCLEOSIDE_DIPHOSPHATE_METABOLIC_PROCESS	14/483	122/15048	3.66025e-05	0.00306439	0.00265581	LDHA/ENTPD1/HIF1A/ENO1/TPI1/ENO2/PGAM1/AK5/PFKP/PGK1/PRKAG2/SLC2A6/HK2/PGAM4	14	CAF2 Up (679)	CAF2 Up (679)
GOBP_POSITIVE_REGULATION_OF_ENDOTHELIAL_CELL_MIGRATION	GOBP_POSITIVE_REGULATION_OF_ENDOTHELIAL_CELL_MIGRATION	14/483	122/15048	3.66025e-05	0.00306439	0.00265581	FGF1/FOXC2/THBS1/BCAR1/EDN1/HIF1A/SASH1/SEMA5A/ETS1/LGMN/RHOJ/EGF/VEGFC/RHOB	14	CAF2 Up (679)	CAF2 Up (679)
GOBP_ALCOHOL_METABOLIC_PROCESS	GOBP_ALCOHOL_METABOLIC_PROCESS	21/303	340/15048	5.60776e-06	0.00334806	0.00273115	DHRS3/SREBF1/ALDH1A3/MOXD1/TM7SF2/ABCA1/COQ2/SNCA/ALDH1A1/LSS/CYP27A1/ITPKA/SPTLC3/ALDH2/GK/AKR1C4/IDH1/AKR1B1/CH25H/G6PD/HRH1	21	NAF Up (396)	NAF Up (396)
GOBP_MESENCHYMAL_CELL_DIFFERENTIATION	GOBP_MESENCHYMAL_CELL_DIFFERENTIATION	17/303	237/15048	6.38537e-06	0.00334806	0.00273115	SFRP1/MDK/EPHA4/SMAD3/TGFBR3/HGF/KITLG/SEMA3B/SEMA4B/TGFBR2/TCF21/ISL1/NRP1/OSR1/TBX3/SEMA3A/HTR2B	17	NAF Up (396)	NAF Up (396)
GOBP_RESPONSE_TO_MECHANICAL_STIMULUS	GOBP_RESPONSE_TO_MECHANICAL_STIMULUS	18/483	190/15048	4.13975e-05	0.00338707	0.00293546	NRXN2/KIT/TLR4/ANKRD1/THBS1/PTK2/EDN1/BNIP3/ENDOG/PKD2/FADD/STAT1/MAP3K1/CITED2/ANO3/CASP2/SLC2A1/FYN	18	CAF2 Up (679)	CAF2 Up (679)
GOBP_VENOUS_BLOOD_VESSEL_DEVELOPMENT	GOBP_VENOUS_BLOOD_VESSEL_DEVELOPMENT	4/159	16/15048	1.97854e-05	0.00378052	0.00314483	HEG1/ACVRL1/FOXF1/SEMA3C	4	CAF1 Up (191)	CAF1 Up (191)
GOBP_GLOMERULUS_DEVELOPMENT	GOBP_GLOMERULUS_DEVELOPMENT	10/483	67/15048	5.07842e-05	0.00399357	0.00346109	HEYL/PDGFA/FOXC2/MYO1E/JAG1/NOTCH3/MEF2C/PODXL/PTPRO/PDGFRB	10	CAF2 Up (679)	CAF2 Up (679)
GOBP_CHONDROITIN_SULFATE_PROTEOGLYCAN_BIOSYNTHETIC_PROCESS	GOBP_CHONDROITIN_SULFATE_PROTEOGLYCAN_BIOSYNTHETIC_PROCESS	6/483	22/15048	5.10289e-05	0.00399357	0.00346109	CHSY3/B3GALT6/CHST3/CHST7/UGDH/CHSY1	6	CAF2 Up (679)	CAF2 Up (679)
GOBP_MORPHOGENESIS_OF_EMBRYONIC_EPITHELIUM	GOBP_MORPHOGENESIS_OF_EMBRYONIC_EPITHELIUM	9/159	146/15048	2.46177e-05	0.00436788	0.00363342	LMO4/RDH10/SOX4/WNT2/PRICKLE1/BMP4/ADM/ALDH1A3/PTK7	9	CAF1 Up (191)	CAF1 Up (191)
GOBP_REGULATION_OF_EPITHELIAL_CELL_MIGRATION	GOBP_REGULATION_OF_EPITHELIAL_CELL_MIGRATION	22/483	269/15048	5.84702e-05	0.00447857	0.00388143	FGF1/FOXC2/CLASP2/THBS1/DOCK5/BCAR1/PTK2/EDN1/HIF1A/SASH1/SEMA5A/ETS1/MEF2C/LGMN/RHOJ/CORO1C/HBEGF/ITGA3/EGF/VEGFC/RHOB/EPHA2	22	CAF2 Up (679)	CAF2 Up (679)
GOBP_REGULATION_OF_EXTRINSIC_APOPTOTIC_SIGNALING_PATHWAY	GOBP_REGULATION_OF_EXTRINSIC_APOPTOTIC_SIGNALING_PATHWAY	13/303	149/15048	9.98156e-06	0.004486	0.00365941	SFRP1/LGALS3/STRADB/HMOX1/HGF/GCLC/PYCARD/GCLM/EYA2/EYA1/FAIM2/NRP1/IL7	13	NAF Up (396)	NAF Up (396)
GOBP_OSSIFICATION	GOBP_OSSIFICATION	28/483	391/15048	6.58266e-05	0.00484411	0.00419823	FOXC2/ID4/TFAP2A/ADAMTS7/JAG1/SLC24A3/SOX11/ITGA11/PTK2/OSTN/HIF1A/SMAD7/CLEC3B/MEF2C/SNAI2/SORT1/OSTF1/SCUBE3/MEF2D/RRAS2/SPP1/COL5A2/VEGFC/CRIM1/EPHA2/CHSY1/FSTL3/MN1	28	CAF2 Up (679)	CAF2 Up (679)
GOBP_NEPHRON_DEVELOPMENT	GOBP_NEPHRON_DEVELOPMENT	15/483	145/15048	6.59337e-05	0.00484411	0.00419823	HEYL/PDGFA/FGF1/FOXC2/MYO1E/JAG1/NOTCH3/FOXD1/PKD2/MEF2C/PODXL/PTPRO/STAT1/ITGA3/PDGFRB	15	CAF2 Up (679)	CAF2 Up (679)
GOBP_MUSCLE_CELL_DIFFERENTIATION	GOBP_MUSCLE_CELL_DIFFERENTIATION	26/483	351/15048	6.86859e-05	0.00494538	0.004286	TRIM32/KIT/DMPK/DYSF/ANKRD1/OLFM2/EDN1/SMARCD3/HEY2/PDLIM5/SORBS2/RGS4/MYH11/MYH9/MEF2C/MYOZ1/SORT1/RARA/ACTN4/TPM1/CSRP2/CAV2/PDGFRB/MYOF/PTGFRN/ITGA8	26	CAF2 Up (679)	CAF2 Up (679)
GOBP_REGULATION_OF_OSSIFICATION	GOBP_REGULATION_OF_OSSIFICATION	11/303	110/15048	1.3363e-05	0.00525499	0.0042867	SFRP1/MDK/DHRS3/SMAD3/S1PR1/SMAD6/LTBP3/FBN2/ENPP1/FAM20C/OSR1	11	NAF Up (396)	NAF Up (396)
GOBP_POSITIVE_REGULATION_OF_PROTEIN_SERINE_THREONINE_KINASE_ACTIVITY	GOBP_POSITIVE_REGULATION_OF_PROTEIN_SERINE_THREONINE_KINASE_ACTIVITY	18/483	201/15048	8.63859e-05	0.00609783	0.00528479	PDGFA/NTF3/FGF1/CDK5R1/CCNYL1/KIT/TLR4/CALM1/THBS1/MAP2K1/EDN1/SASH1/PKD2/PDGFRB/EGF/RASGRP1/CCND2/CKS1B	18	CAF2 Up (679)	CAF2 Up (679)
GOBP_UROGENITAL_SYSTEM_DEVELOPMENT	GOBP_UROGENITAL_SYSTEM_DEVELOPMENT	20/303	340/15048	1.91473e-05	0.00669306	0.00545979	SFRP1/EPHA4/ACAT1/SMAD3/FOXF1/GATA2/SLIT2/SIX4/HOXA13/SMAD6/TCF21/EYA1/SDC4/NRP1/NKX3-1/AKR1B1/RARB/SERPINF1/ASS1/OSR1	20	NAF Up (396)	NAF Up (396)
GOBP_MITOCHONDRIAL_DEPOLARIZATION	GOBP_MITOCHONDRIAL_DEPOLARIZATION	4/159	19/15048	4.11069e-05	0.00680729	0.00566265	GCLM/IFI6/DCN/GCLC	4	CAF1 Up (191)	CAF1 Up (191)
GOBP_NEGATIVE_REGULATION_OF_RESPONSE_TO_EXTERNAL_STIMULUS	GOBP_NEGATIVE_REGULATION_OF_RESPONSE_TO_EXTERNAL_STIMULUS	22/303	401/15048	2.16566e-05	0.00681315	0.00555776	MDK/EPHA4/SMAD3/NBL1/FOXF1/SLIT2/LRFN5/HGF/CD9/SEMA3B/PPARG/SEMA4B/PLK2/NUCB2/NR1H3/ISL1/NRP1/PLAT/SERPINF1/TRIB1/PROS1/SEMA3A	22	NAF Up (396)	NAF Up (396)
GOBP_KIDNEY_EPITHELIUM_DEVELOPMENT	GOBP_KIDNEY_EPITHELIUM_DEVELOPMENT	12/303	139/15048	2.43686e-05	0.00696942	0.00568523	SFRP1/EPHA4/ACAT1/SMAD3/SLIT2/SIX4/SMAD6/TCF21/EYA1/SDC4/RARB/OSR1	12	NAF Up (396)	NAF Up (396)
GOBP_CARDIAC_CHAMBER_MORPHOGENESIS	GOBP_CARDIAC_CHAMBER_MORPHOGENESIS	8/159	122/15048	4.52601e-05	0.00702662	0.0058451	DHRS3/SOX4/HEG1/WNT2/BMP4/TGFBR2/FOXF1/SEMA3C	8	CAF1 Up (191)	CAF1 Up (191)
GOBP_MESONEPHROS_DEVELOPMENT	GOBP_MESONEPHROS_DEVELOPMENT	10/303	98/15048	2.76766e-05	0.00711068	0.00580046	SFRP1/SMAD3/SLIT2/SIX4/SMAD6/TCF21/EYA1/SDC4/RARB/OSR1	10	NAF Up (396)	NAF Up (396)
GOBP_EXTRINSIC_APOPTOTIC_SIGNALING_PATHWAY	GOBP_EXTRINSIC_APOPTOTIC_SIGNALING_PATHWAY	15/303	214/15048	2.9383e-05	0.00711068	0.00580046	SFRP1/LGALS3/STRADB/HMOX1/SMAD3/HGF/KITLG/GCLC/PYCARD/GCLM/EYA2/EYA1/FAIM2/NRP1/IL7	15	NAF Up (396)	NAF Up (396)
GOBP_POSITIVE_REGULATION_OF_KINASE_ACTIVITY	GOBP_POSITIVE_REGULATION_OF_KINASE_ACTIVITY	30/483	444/15048	0.000104519	0.00723595	0.00627116	PDGFA/EPHB1/NTF3/FGF1/CDK5R1/ERCC6/CCNYL1/KIT/AFAP1L2/TLR4/CALM1/THBS1/MAP2K1/PTK2/EDN1/AXL/SASH1/NEDD9/PKD2/NTRK2/TPX2/HBEGF/PRKAG2/PDGFRB/EGF/RASGRP1/VEGFC/EPHA2/CCND2/CKS1B	30	CAF2 Up (679)	CAF2 Up (679)
GOBP_REGULATION_OF_NEUROGENESIS	GOBP_REGULATION_OF_NEUROGENESIS	25/483	341/15048	0.000111208	0.00741398	0.00642545	HEYL/DAAM2/TRIM32/CDK5R1/YWHAH/NGF/ACTR2/KIT/ID4/SEMA5B/PRKCH/MAP2K1/SOX11/FN1/SMARCD3/HIF1A/HEY2/SEMA5A/DOCK7/PLXND1/SPEN/NTRK2/SPP1/VEGFC/SEMA6A	25	CAF2 Up (679)	CAF2 Up (679)
GOBP_ESTABLISHMENT_OR_MAINTENANCE_OF_CELL_POLARITY	GOBP_ESTABLISHMENT_OR_MAINTENANCE_OF_CELL_POLARITY	18/483	205/15048	0.00011121	0.00741398	0.00642545	EPHB1/FRMD4A/ACTR2/CLASP2/PTK2/ARPC5/DOCK7/NDE1/MYH9/MSN/CYTH3/FAT1/PLEKHG3/GPSM2/RHOB/KIF2C/SPINT2/ACTR3	18	CAF2 Up (679)	CAF2 Up (679)
GOBP_ESTABLISHMENT_OF_ORGANELLE_LOCALIZATION	GOBP_ESTABLISHMENT_OF_ORGANELLE_LOCALIZATION	26/483	363/15048	0.000118973	0.00778731	0.006749	MYO1B/MYO1E/ACTR2/KIT/CLASP2/FHOD1/MARK1/HIF1A/FMN2/DOCK7/GEM/NDE1/MYH9/MYO1D/ACTN4/TRAK1/MIS12/AGTPBP1/RASGRP1/GPSM2/SPIRE1/NUF2/KIF2C/NUSAP1/ACTR3/FNBP1L	26	CAF2 Up (679)	CAF2 Up (679)
GOBP_MUSCLE_ORGAN_DEVELOPMENT	GOBP_MUSCLE_ORGAN_DEVELOPMENT	23/483	303/15048	0.000124366	0.00799496	0.00692896	HEYL/EPHB1/FOXC2/ZFHX3/DSP/CRYAB/ANKRD1/ELN/SOX11/ITGA11/SGCA/ITGA7/HMG20B/SMAD7/HEY2/MEF2C/MYOZ1/TPM1/HBEGF/MEF2D/FZD2/CITED2/CAV2	23	CAF2 Up (679)	CAF2 Up (679)
GOBP_MESENCHYMAL_CELL_PROLIFERATION	GOBP_MESENCHYMAL_CELL_PROLIFERATION	5/159	41/15048	6.8159e-05	0.00974814	0.00810899	WNT2/BMP4/TGFBR2/FGF7/FOXF1	5	CAF1 Up (191)	CAF1 Up (191)
GOBP_EXTERNAL_ENCAPSULATING_STRUCTURE_ORGANIZATION	GOBP_EXTERNAL_ENCAPSULATING_STRUCTURE_ORGANIZATION	12/159	295/15048	7.06387e-05	0.00974814	0.00810899	FBLN5/DPP4/APP/FBLN1/ADAMTS5/SLC39A8/LAMB1/GAS6/PDPN/LUM/ANTXR1/FOXF1	12	CAF1 Up (191)	CAF1 Up (191)
GOBP_ORGANELLE_LOCALIZATION	GOBP_ORGANELLE_LOCALIZATION	31/483	476/15048	0.000156462	0.00976336	0.00846158	MYO1B/MYO1E/ACTR2/KIT/DNM1L/CLASP2/CALM1/FHOD1/MARK1/HIF1A/FMN2/DOCK7/GEM/NDE1/MYH9/MYO1D/ACTN4/STX2/TRAK1/MIS12/CAV2/AGTPBP1/RASGRP1/PCDH17/GPSM2/SPIRE1/NUF2/KIF2C/NUSAP1/ACTR3/FNBP1L	31	CAF2 Up (679)	CAF2 Up (679)
GOBP_NEGATIVE_REGULATION_OF_CELL_ADHESION	GOBP_NEGATIVE_REGULATION_OF_CELL_ADHESION	22/483	288/15048	0.000158649	0.00976336	0.00846158	CLASP2/JAG1/DLC1/THBS1/LRRC32/PTK2/SMAD7/SEMA5A/PLXND1/CDH13/SERPINE1/PELI1/LOXL3/SNAI2/PODXL/PTPRO/ACTN4/ARHGDIB/CORO1C/ARHGDIA/SEMA6A/SPINT2	22	CAF2 Up (679)	CAF2 Up (679)
GOBP_POSITIVE_REGULATION_OF_PROTEIN_KINASE_ACTIVITY	GOBP_POSITIVE_REGULATION_OF_PROTEIN_KINASE_ACTIVITY	26/483	370/15048	0.000161609	0.00976336	0.00846158	PDGFA/NTF3/FGF1/CDK5R1/ERCC6/CCNYL1/KIT/AFAP1L2/TLR4/CALM1/THBS1/MAP2K1/PTK2/EDN1/SASH1/NEDD9/PKD2/TPX2/HBEGF/PRKAG2/PDGFRB/EGF/RASGRP1/VEGFC/CCND2/CKS1B	26	CAF2 Up (679)	CAF2 Up (679)
GOBP_NEGATIVE_REGULATION_OF_DEVELOPMENTAL_GROWTH	GOBP_NEGATIVE_REGULATION_OF_DEVELOPMENTAL_GROWTH	12/483	107/15048	0.000162723	0.00976336	0.00846158	CDK5R1/SEMA5B/VGLL4/OSTN/RGS4/SEMA5A/STC2/MYOZ1/LGMN/CITED2/SPP1/SEMA6A	12	CAF2 Up (679)	CAF2 Up (679)
GOBP_ACTIN_FILAMENT_NETWORK_FORMATION	GOBP_ACTIN_FILAMENT_NETWORK_FORMATION	4/483	10/15048	0.000188713	0.0109575	0.00949652	PLS3/FHOD1/ARPC5/SPIRE1	4	CAF2 Up (679)	CAF2 Up (679)
GOBP_DOUBLE_STRAND_BREAK_REPAIR_VIA_BREAK_INDUCED_REPLICATION	GOBP_DOUBLE_STRAND_BREAK_REPAIR_VIA_BREAK_INDUCED_REPLICATION	4/483	10/15048	0.000188713	0.0109575	0.00949652	MCM2/MCM5/GINS2/MCM3	4	CAF2 Up (679)	CAF2 Up (679)
GOBP_REGULATION_OF_NEURON_DIFFERENTIATION	GOBP_REGULATION_OF_NEURON_DIFFERENTIATION	16/483	178/15048	0.000201982	0.0115419	0.0100029	HEYL/NTF3/S1PR5/ZFHX3/TRIM32/CDK5R1/YWHAH/NGF/ID4/JAG1/NOTCH3/SOX11/HMG20B/HEY2/MEF2C/RARA	16	CAF2 Up (679)	CAF2 Up (679)
GOBP_MUSCLE_SYSTEM_PROCESS	GOBP_MUSCLE_SYSTEM_PROCESS	28/483	419/15048	0.00021228	0.0119407	0.0103486	KCNE4/DSP/CRYAB/KIT/DMPK/SNTA1/CALM1/DOCK5/EDN1/EHD3/SGCA/ENO1/SMAD7/PPP1R13L/HEY2/PDLIM5/SORBS2/RGS4/SNTB1/MYH11/MYOZ1/TPM1/OXTR/ANXA6/ADA/MYOF/CALD1/ATP1B1	28	CAF2 Up (679)	CAF2 Up (679)
GOBP_BRANCHING_MORPHOGENESIS_OF_AN_EPITHELIAL_TUBE	GOBP_BRANCHING_MORPHOGENESIS_OF_AN_EPITHELIAL_TUBE	12/303	152/15048	5.89585e-05	0.0125468	0.0102349	MDK/FOXF1/SLIT2/SIX4/TGFBR2/TCF21/EYA1/HOXA5/MET/NRP1/NKX3-1/TBX3	12	NAF Up (396)	NAF Up (396)
GOBP_NEGATIVE_REGULATION_OF_LIPID_STORAGE	GOBP_NEGATIVE_REGULATION_OF_LIPID_STORAGE	5/303	22/15048	6.3643e-05	0.0125468	0.0102349	ABCA1/PPARG/ABHD5/NR1H3/NFKBIA	5	NAF Up (396)	NAF Up (396)
GOBP_CARDIAC_SEPTUM_MORPHOGENESIS	GOBP_CARDIAC_SEPTUM_MORPHOGENESIS	8/303	68/15048	6.38107e-05	0.0125468	0.0102349	DHRS3/TGFBR3/SLIT2/SMAD6/TGFBR2/ISL1/NRP1/TBX3	8	NAF Up (396)	NAF Up (396)
GOBP_EMBRYONIC_ORGAN_MORPHOGENESIS	GOBP_EMBRYONIC_ORGAN_MORPHOGENESIS	17/303	286/15048	7.1188e-05	0.013174	0.0107465	LRIG3/ALDH1A3/SMAD3/FOXF1/GATA2/TSHZ1/SIX4/TGFBR2/FBN2/TCF21/EYA1/HOXA5/LRIG1/TTC39C/RARB/OSR1/TBX3	17	NAF Up (396)	NAF Up (396)
GOBP_STRIATED_MUSCLE_CELL_DIFFERENTIATION	GOBP_STRIATED_MUSCLE_CELL_DIFFERENTIATION	20/483	257/15048	0.000244467	0.0135397	0.0117344	TRIM32/DMPK/ANKRD1/EDN1/HEY2/PDLIM5/SORBS2/RGS4/MYH11/MYH9/MEF2C/MYOZ1/SORT1/RARA/TPM1/CSRP2/CAV2/PDGFRB/MYOF/PTGFRN	20	CAF2 Up (679)	CAF2 Up (679)
GOBP_VENTRICULAR_SEPTUM_MORPHOGENESIS	GOBP_VENTRICULAR_SEPTUM_MORPHOGENESIS	7/483	40/15048	0.000249873	0.0136294	0.0118122	HEYL/SOX11/SMAD7/HEY2/FZD2/CITED2/SLIT3	7	CAF2 Up (679)	CAF2 Up (679)
GOBP_EAR_DEVELOPMENT	GOBP_EAR_DEVELOPMENT	14/303	207/15048	7.9616e-05	0.0137149	0.0111878	EPHA4/LRIG3/ALDH1A3/CEBPD/GATA2/TSHZ1/SIX4/HOXA13/EYA1/SDC4/LRIG1/TTC39C/OSR1/TBX3	14	NAF Up (396)	NAF Up (396)
GOBP_NEGATIVE_REGULATION_OF_PROTEIN_MODIFICATION_PROCESS	GOBP_NEGATIVE_REGULATION_OF_PROTEIN_MODIFICATION_PROCESS	23/303	470/15048	8.28299e-05	0.0137149	0.0111878	SFRP1/BAG2/LGALS3/RGS2/NXN/FBLN1/SQSTM1/SLIT2/PKIA/HGF/PPARG/GCLC/SMAD6/PYCARD/RPS7/SNCA/ENPP1/CAMK2N1/BDKRB2/CNKSR3/TRIB1/G6PD/BDKRB1	23	NAF Up (396)	NAF Up (396)
GOBP_CARDIAC_VENTRICLE_MORPHOGENESIS	GOBP_CARDIAC_VENTRICLE_MORPHOGENESIS	6/159	72/15048	0.000111268	0.0139319	0.0115892	SOX4/HEG1/BMP4/TGFBR2/FOXF1/SEMA3C	6	CAF1 Up (191)	CAF1 Up (191)
GOBP_HEMOSTASIS	GOBP_HEMOSTASIS	10/159	219/15048	0.000112173	0.0139319	0.0115892	AK3/TYRO3/FBLN1/IL6ST/GAS6/PDPN/NFE2L2/ITGA2/F3/VTN	10	CAF1 Up (191)	CAF1 Up (191)
GOBP_NEGATIVE_REGULATION_OF_MACROPHAGE_DERIVED_FOAM_CELL_DIFFERENTIATION	GOBP_NEGATIVE_REGULATION_OF_MACROPHAGE_DERIVED_FOAM_CELL_DIFFERENTIATION	4/303	13/15048	9.98187e-05	0.0148762	0.0121351	ABCA1/PPARG/NR1H3/NFKBIA	4	NAF Up (396)	NAF Up (396)
GOBP_EPITHELIAL_TUBE_MORPHOGENESIS	GOBP_EPITHELIAL_TUBE_MORPHOGENESIS	18/303	324/15048	0.000104111	0.0148762	0.0121351	SFRP1/MDK/EPHA4/SMAD3/FOXF1/SLIT2/SIX4/TGFBR2/RPS7/TCF21/EYA1/HOXA5/MET/SDC4/NRP1/NKX3-1/OSR1/TBX3	18	NAF Up (396)	NAF Up (396)
GOBP_RESPONSE_TO_KETONE	GOBP_RESPONSE_TO_KETONE	13/303	187/15048	0.000108272	0.0148762	0.0121351	SFRP1/GNG2/PTGER2/SREBF1/TGFBR3/SLIT2/HOXA13/NR1H3/PARP1/NKX3-1/PLAT/SERPINF1/ASS1	13	NAF Up (396)	NAF Up (396)
GOBP_NEGATIVE_REGULATION_OF_NEURON_APOPTOTIC_PROCESS	GOBP_NEGATIVE_REGULATION_OF_NEURON_APOPTOTIC_PROCESS	11/303	138/15048	0.000109583	0.0148762	0.0121351	MDK/HMOX1/SOD2/SIX4/GCLC/IL6ST/GCLM/SNCA/ISL1/FAIM2/NRP1	11	NAF Up (396)	NAF Up (396)
GOBP_REGULATION_OF_ACTIN_FILAMENT_ORGANIZATION	GOBP_REGULATION_OF_ACTIN_FILAMENT_ORGANIZATION	15/303	242/15048	0.000119089	0.0148762	0.0121351	SFRP1/SMAD3/ASAP3/S1PR1/BIN1/SLIT2/CAPG/LPAR1/CDC42EP4/PYCARD/TMOD1/MET/SDC4/NRP1/CGNL1	15	NAF Up (396)	NAF Up (396)
GOBP_REGULATION_OF_ACTOMYOSIN_STRUCTURE_ORGANIZATION	GOBP_REGULATION_OF_ACTOMYOSIN_STRUCTURE_ORGANIZATION	9/303	95/15048	0.000124612	0.0148762	0.0121351	SFRP1/SMAD3/ASAP3/S1PR1/LPAR1/MET/SDC4/NRP1/CGNL1	9	NAF Up (396)	NAF Up (396)
GOBP_GENERATION_OF_PRECURSOR_METABOLITES_AND_ENERGY	GOBP_GENERATION_OF_PRECURSOR_METABOLITES_AND_ENERGY	21/303	421/15048	0.000129682	0.0148762	0.0121351	TKT/DHRS3/ACAT1/SOD2/GNPDA1/SLC25A22/IL6ST/ACO1/ME1/OXCT2/SNCA/ENPP1/ALDH2/IRS1/AKR1C4/CROT/GFPT2/PGD/IDH1/AKR1B1/G6PD	21	NAF Up (396)	NAF Up (396)
GOBP_EAR_MORPHOGENESIS	GOBP_EAR_MORPHOGENESIS	10/303	118/15048	0.000135237	0.0148762	0.0121351	LRIG3/ALDH1A3/GATA2/TSHZ1/SIX4/EYA1/LRIG1/TTC39C/OSR1/TBX3	10	NAF Up (396)	NAF Up (396)
GOBP_REGULATION_OF_ACTIN_FILAMENT_BASED_PROCESS	GOBP_REGULATION_OF_ACTIN_FILAMENT_BASED_PROCESS	19/303	362/15048	0.000141398	0.0148762	0.0121351	SFRP1/MDK/SMAD3/RHOBTB3/ASAP3/S1PR1/BIN1/SLIT2/CAPG/LPAR1/KCNJ2/CDC42EP4/PYCARD/TMOD1/MET/SDC4/NRP1/CGNL1/FGF13	19	NAF Up (396)	NAF Up (396)
GOBP_PATTERN_SPECIFICATION_PROCESS	GOBP_PATTERN_SPECIFICATION_PROCESS	21/303	426/15048	0.000152687	0.0148762	0.0121351	SFRP1/SMAD3/NBL1/FOXF1/MID1/TSHZ1/SMAD6/TGFBR2/MEIS1/EYA1/PBX3/HOXA5/ISL1/NRP1/NKX3-1/MEIS2/OSR1/TBX3/SEMA3A/FST/RELN	21	NAF Up (396)	NAF Up (396)
GOBP_NEGATIVE_REGULATION_OF_PHOSPHORUS_METABOLIC_PROCESS	GOBP_NEGATIVE_REGULATION_OF_PHOSPHORUS_METABOLIC_PROCESS	20/303	396/15048	0.00015888	0.0148762	0.0121351	SFRP1/LGALS3/RGS2/FBLN1/SLIT2/PKIA/HGF/LPIN1/PPARG/SMAD6/PYCARD/SNCA/PPP2R5A/PARP1/ENPP1/CAMK2N1/BDKRB2/CNKSR3/TRIB1/BDKRB1	20	NAF Up (396)	NAF Up (396)
GOBP_OUTFLOW_TRACT_MORPHOGENESIS	GOBP_OUTFLOW_TRACT_MORPHOGENESIS	8/303	78/15048	0.000170119	0.0148762	0.0121351	DHRS3/TGFBR3/SMAD6/TGFBR2/EYA1/ISL1/NRP1/TBX3	8	NAF Up (396)	NAF Up (396)
GOBP_CARDIAC_SEPTUM_DEVELOPMENT	GOBP_CARDIAC_SEPTUM_DEVELOPMENT	9/303	99/15048	0.000171155	0.0148762	0.0121351	DHRS3/TGFBR3/SLIT2/HOXA13/SMAD6/TGFBR2/ISL1/NRP1/TBX3	9	NAF Up (396)	NAF Up (396)
GOBP_REGULATION_OF_ACTIN_FILAMENT_BUNDLE_ASSEMBLY	GOBP_REGULATION_OF_ACTIN_FILAMENT_BUNDLE_ASSEMBLY	9/303	99/15048	0.000171155	0.0148762	0.0121351	SFRP1/SMAD3/ASAP3/S1PR1/LPAR1/MET/SDC4/NRP1/CGNL1	9	NAF Up (396)	NAF Up (396)
GOBP_CARDIAC_CHAMBER_MORPHOGENESIS	GOBP_CARDIAC_CHAMBER_MORPHOGENESIS	10/303	122/15048	0.00017822	0.0148762	0.0121351	DHRS3/TGFBR3/FOXF1/SLIT2/LY6E/SMAD6/TGFBR2/ISL1/NRP1/TBX3	10	NAF Up (396)	NAF Up (396)
GOBP_POSITIVE_REGULATION_OF_CHOLESTEROL_EFFLUX	GOBP_POSITIVE_REGULATION_OF_CHOLESTEROL_EFFLUX	5/303	27/15048	0.000179649	0.0148762	0.0121351	ABCA1/PPARG/PLTP/NR1H3/NFKBIA	5	NAF Up (396)	NAF Up (396)
GOBP_REGULATION_OF_NEURON_PROJECTION_DEVELOPMENT	GOBP_REGULATION_OF_NEURON_PROJECTION_DEVELOPMENT	20/303	400/15048	0.000181569	0.0148762	0.0121351	SFRP1/RGS2/MDK/NR2F1/EPHA4/SLIT2/LPAR1/HGF/SEMA3B/TMEM106B/SEMA4B/MYLIP/NLGN1/ITPKA/NTNG1/NRP1/SERPINF1/SEMA3A/RELN/FGF13	20	NAF Up (396)	NAF Up (396)
GOBP_MORPHOGENESIS_OF_AN_EPITHELIUM	GOBP_MORPHOGENESIS_OF_AN_EPITHELIUM	23/303	496/15048	0.000183502	0.0148762	0.0121351	SFRP1/MDK/EPHA4/ALDH1A3/SMAD3/FOXF1/SLIT2/HGF/SIX4/HOXA13/TGFBR2/RPS7/TCF21/EYA1/HOXA5/MET/SDC4/NRP1/NKX3-1/OSR1/TBX3/SEMA3A/FST	23	NAF Up (396)	NAF Up (396)
GOBP_REGULATION_OF_SUPRAMOLECULAR_FIBER_ORGANIZATION	GOBP_REGULATION_OF_SUPRAMOLECULAR_FIBER_ORGANIZATION	18/303	340/15048	0.000189953	0.0148762	0.0121351	SFRP1/SMAD3/ASAP3/S1PR1/BIN1/SLIT2/CAPG/LPAR1/MID1/CDC42EP4/PYCARD/SNCA/TMOD1/MET/SDC4/NRP1/CGNL1/FGF13	18	NAF Up (396)	NAF Up (396)
GOBP_REGULATION_OF_OSTEOBLAST_DIFFERENTIATION	GOBP_REGULATION_OF_OSTEOBLAST_DIFFERENTIATION	10/303	123/15048	0.0001906	0.0148762	0.0121351	SFRP1/SMAD3/CEBPD/HGF/PPARG/IL6ST/SMAD6/FBN2/TWIST2/FAM20C	10	NAF Up (396)	NAF Up (396)
GOBP_FATTY_ACID_METABOLIC_PROCESS	GOBP_FATTY_ACID_METABOLIC_PROCESS	19/303	371/15048	0.000193854	0.0148762	0.0121351	GPX4/SREBF1/ACAT1/ZADH2/ELOVL5/LPIN1/SCD/PPARG/ABHD5/ACSL3/SNCA/NR1H3/IRS1/AKR1C4/CROT/FADS1/PTGES/AKR1B1/FASN	19	NAF Up (396)	NAF Up (396)
GOBP_NEURAL_CREST_CELL_MIGRATION	GOBP_NEURAL_CREST_CELL_MIGRATION	7/303	60/15048	0.000193873	0.0148762	0.0121351	KITLG/SEMA3B/SEMA4B/ISL1/NRP1/SEMA3A/HTR2B	7	NAF Up (396)	NAF Up (396)
GOBP_NADH_REGENERATION	GOBP_NADH_REGENERATION	4/483	11/15048	0.000289043	0.0153023	0.013262	ENO1/ENO2/PFKP/HK2	4	CAF2 Up (679)	CAF2 Up (679)
GOBP_NOTCH_SIGNALING_INVOLVED_IN_HEART_DEVELOPMENT	GOBP_NOTCH_SIGNALING_INVOLVED_IN_HEART_DEVELOPMENT	4/483	11/15048	0.000289043	0.0153023	0.013262	HEYL/JAG1/HEY2/SNAI2	4	CAF2 Up (679)	CAF2 Up (679)
GOBP_MUSCLE_TISSUE_DEVELOPMENT	GOBP_MUSCLE_TISSUE_DEVELOPMENT	19/303	374/15048	0.000214788	0.0155521	0.0126865	RGS2/SMAD3/TGFBR3/S1PR1/LY6E/VAMP5/SIX4/SOX15/HOPX/TGFBR2/EYA2/TCF21/EYA1/PGM5/ISL1/RARB/OSR1/G6PD/TBX3	19	NAF Up (396)	NAF Up (396)
GOBP_REGULATION_OF_MUSCLE_HYPERTROPHY	GOBP_REGULATION_OF_MUSCLE_HYPERTROPHY	7/303	61/15048	0.000215283	0.0155521	0.0126865	RGS2/SMAD3/PPARG/IL6ST/PARP1/PDE5A/G6PD	7	NAF Up (396)	NAF Up (396)
GOBP_ORGANIC_HYDROXY_COMPOUND_BIOSYNTHETIC_PROCESS	GOBP_ORGANIC_HYDROXY_COMPOUND_BIOSYNTHETIC_PROCESS	14/303	228/15048	0.000220375	0.0155521	0.0126865	SREBF1/MOXD1/TM7SF2/PLTP/SNCA/LSS/CYP27A1/ITPKA/SPTLC3/ALDH2/AKR1C4/CH25H/G6PD/HRH1	14	NAF Up (396)	NAF Up (396)
GOBP_REGENERATION	GOBP_REGENERATION	12/303	175/15048	0.000225305	0.0155521	0.0126865	MDK/EPHA4/HMOX1/TGFBR3/NINJ1/HGF/CD9/LPIN1/SOX15/HOPX/TGFBR2/ISL1	12	NAF Up (396)	NAF Up (396)
GOBP_STRESS_FIBER_ASSEMBLY	GOBP_STRESS_FIBER_ASSEMBLY	9/303	103/15048	0.000231362	0.0155521	0.0126865	SFRP1/SMAD3/ASAP3/S1PR1/LPAR1/MET/SDC4/NRP1/CGNL1	9	NAF Up (396)	NAF Up (396)
GOBP_REGULATION_OF_APOPTOTIC_SIGNALING_PATHWAY	GOBP_REGULATION_OF_APOPTOTIC_SIGNALING_PATHWAY	18/303	346/15048	0.000235395	0.0155521	0.0126865	SFRP1/LGALS3/STRADB/HMOX1/SOD2/HGF/GCLC/PYCARD/RPS7/GCLM/PARP1/EYA2/EYA1/FAIM2/NRP1/NKX3-1/BDKRB2/IL7	18	NAF Up (396)	NAF Up (396)
GOBP_NEGATIVE_REGULATION_OF_CELL_GROWTH	GOBP_NEGATIVE_REGULATION_OF_CELL_GROWTH	12/303	176/15048	0.000237522	0.0155521	0.0126865	SFRP1/RGS2/SMAD3/SLIT2/SEMA3B/SEMA4B/ENPP1/NRP1/G6PD/SEMA3A/BDKRB1/FGF13	12	NAF Up (396)	NAF Up (396)
GOBP_REGULATION_OF_PHOSPHOLIPID_BIOSYNTHETIC_PROCESS	GOBP_REGULATION_OF_PHOSPHOLIPID_BIOSYNTHETIC_PROCESS	4/303	16/15048	0.00024223	0.0155521	0.0126865	LPIN1/ACSL3/IDH1/HTR2B	4	NAF Up (396)	NAF Up (396)
GOBP_MODULATION_OF_AGE_RELATED_BEHAVIORAL_DECLINE	GOBP_MODULATION_OF_AGE_RELATED_BEHAVIORAL_DECLINE	3/159	10/15048	0.000131548	0.0155603	0.0129438	PRNP/APP/PICALM	3	CAF1 Up (191)	CAF1 Up (191)
GOBP_POSITIVE_REGULATION_OF_CELL_DEVELOPMENT	GOBP_POSITIVE_REGULATION_OF_CELL_DEVELOPMENT	21/483	282/15048	0.000314184	0.0162665	0.0140976	PDE3A/TRIM32/NGF/ACTR2/KIT/PRKCH/MAP2K1/DOCK5/SOX11/FN1/SMARCD3/HIF1A/SMAD7/NEDD9/SEMA5A/PLXND1/SPEN/NTRK2/LIMS2/VEGFC/LIMS1	21	CAF2 Up (679)	CAF2 Up (679)
GOBP_EYE_MORPHOGENESIS	GOBP_EYE_MORPHOGENESIS	14/483	149/15048	0.000316292	0.0162665	0.0140976	EPHB1/TFAP2A/JAG1/SOX11/HIF1A/FBN1/NTRK2/COL5A1/FAT1/COL8A1/CITED2/AGTPBP1/COL5A2/EPHA2	14	CAF2 Up (679)	CAF2 Up (679)
GOBP_NEURON_APOPTOTIC_PROCESS	GOBP_NEURON_APOPTOTIC_PROCESS	14/303	232/15048	0.000263552	0.0162786	0.0132791	MDK/HMOX1/TRIM2/SOD2/SIX4/GCLC/IL6ST/GCLM/SNCA/PARP1/ISL1/FAIM2/NRP1/G6PD	14	NAF Up (396)	NAF Up (396)
GOBP_NEGATIVE_REGULATION_OF_NEURON_PROJECTION_DEVELOPMENT	GOBP_NEGATIVE_REGULATION_OF_NEURON_PROJECTION_DEVELOPMENT	10/303	128/15048	0.000263893	0.0162786	0.0132791	NR2F1/EPHA4/LPAR1/SEMA3B/SEMA4B/MYLIP/NLGN1/NRP1/SEMA3A/FGF13	10	NAF Up (396)	NAF Up (396)
GOBP_DENDRITIC_CELL_DIFFERENTIATION	GOBP_DENDRITIC_CELL_DIFFERENTIATION	5/159	48/15048	0.00014674	0.0165682	0.0137823	TMEM176A/TMEM176B/TGFBR2/GAS6/LTBR	5	CAF1 Up (191)	CAF1 Up (191)
GOBP_NEGATIVE_REGULATION_OF_GROWTH	GOBP_NEGATIVE_REGULATION_OF_GROWTH	14/303	234/15048	0.000287739	0.0174082	0.0142006	SFRP1/RGS2/SMAD3/SLIT2/SEMA3B/SEMA4B/TGFBR2/ENPP1/NRP1/G6PD/SOCS2/SEMA3A/BDKRB1/FGF13	14	NAF Up (396)	NAF Up (396)
GOBP_CARBOHYDRATE_DERIVATIVE_TRANSPORT	GOBP_CARBOHYDRATE_DERIVATIVE_TRANSPORT	6/159	77/15048	0.000161684	0.0174618	0.0145256	SLC35C1/SCARB1/LRRC8D/ABCC3/SLC15A3/ABCC4	6	CAF1 Up (191)	CAF1 Up (191)
GOBP_ACTIN_FILAMENT_BASED_TRANSPORT	GOBP_ACTIN_FILAMENT_BASED_TRANSPORT	5/483	20/15048	0.000346855	0.017587	0.0152421	MYO1B/MYO1E/MYO1D/ACTN4/FNBP1L	5	CAF2 Up (679)	CAF2 Up (679)
GOBP_EPITHELIAL_TUBE_MORPHOGENESIS	GOBP_EPITHELIAL_TUBE_MORPHOGENESIS	12/159	324/15048	0.00017086	0.017684	0.0147104	LMO4/RDH10/SOX4/WNT2/PRICKLE1/FGF2/BMP4/TGFBR2/ACVRL1/ADM/PTK7/FOXF1	12	CAF1 Up (191)	CAF1 Up (191)
GOBP_LIMB_BUD_FORMATION	GOBP_LIMB_BUD_FORMATION	3/159	11/15048	0.000179477	0.0178328	0.0148342	SOX4/ZNF219/SEMA3C	3	CAF1 Up (191)	CAF1 Up (191)
GOBP_RAS_PROTEIN_SIGNAL_TRANSDUCTION	GOBP_RAS_PROTEIN_SIGNAL_TRANSDUCTION	23/483	326/15048	0.000360038	0.0178747	0.0154914	NGF/RAB33A/DLC1/EPS8/ARHGAP24/RERG/CDH13/RHOJ/CYTH3/ARHGDIB/CYTH2/ARHGDIA/ITGA3/PDGFRB/RRAS2/AGTR1/RASGRP1/NRAS/GPSM2/NKIRAS2/RIT1/RHOB/STMN1	23	CAF2 Up (679)	CAF2 Up (679)
GOBP_CONNECTIVE_TISSUE_DEVELOPMENT	GOBP_CONNECTIVE_TISSUE_DEVELOPMENT	19/483	245/15048	0.000362459	0.0178747	0.0154914	PDGFA/CRIP1/FOXC2/ID4/ADAMTS7/FOXD1/EDN1/HIF1A/SMAD7/MEF2C/SNAI2/RARA/MUSTN1/COL5A1/MEF2D/CREB3L2/ANXA6/PDGFRB/CHSY1	19	CAF2 Up (679)	CAF2 Up (679)
GOBP_MALE_SEX_DIFFERENTIATION	GOBP_MALE_SEX_DIFFERENTIATION	11/303	155/15048	0.000304589	0.0179548	0.0146464	SFRP1/RHOBTB3/KITLG/SIX4/SOX15/HOXA13/TCF21/NKX3-1/LHFPL2/TBX3/SEMA3A	11	NAF Up (396)	NAF Up (396)
GOBP_NEGATIVE_REGULATION_OF_DEVELOPMENTAL_GROWTH	GOBP_NEGATIVE_REGULATION_OF_DEVELOPMENTAL_GROWTH	9/303	107/15048	0.000308188	0.0179548	0.0146464	RGS2/SEMA3B/SEMA4B/TGFBR2/NRP1/G6PD/SOCS2/SEMA3A/FGF13	9	NAF Up (396)	NAF Up (396)
GOBP_REGULATION_OF_CELL_JUNCTION_ASSEMBLY	GOBP_REGULATION_OF_CELL_JUNCTION_ASSEMBLY	16/483	188/15048	0.000375364	0.0182609	0.0158262	EPHB1/CLASP2/PRKCH/DLC1/THBS1/PTK2/PDLIM5/MEF2C/SNAI2/NTRK2/CORO1C/OXTR/IL1RAP/GPC4/EPHA2/LIMS1	16	CAF2 Up (679)	CAF2 Up (679)
GOBP_TUBE_FORMATION	GOBP_TUBE_FORMATION	8/159	150/15048	0.000192666	0.018407	0.0153119	LMO4/TGM2/SOX4/PRICKLE1/FGF2/BMP4/ADM/PTK7	8	CAF1 Up (191)	CAF1 Up (191)
GOBP_MUSCLE_CELL_DEVELOPMENT	GOBP_MUSCLE_CELL_DEVELOPMENT	15/483	170/15048	0.000386587	0.0185125	0.0160442	DYSF/ANKRD1/EDN1/HEY2/PDLIM5/SORBS2/RGS4/MYH11/MYOZ1/ACTN4/TPM1/CSRP2/CAV2/PDGFRB/MYOF	15	CAF2 Up (679)	CAF2 Up (679)
GOBP_SUBSTRATE_ADHESION_DEPENDENT_CELL_SPREADING	GOBP_SUBSTRATE_ADHESION_DEPENDENT_CELL_SPREADING	11/483	101/15048	0.00039082	0.0185125	0.0160442	NTN4/DOCK5/FN1/PTK2/AXL/NEDD9/ACTN4/CORO1C/LIMS2/ITGA8/LIMS1	11	CAF2 Up (679)	CAF2 Up (679)
GOBP_SEX_DIFFERENTIATION	GOBP_SEX_DIFFERENTIATION	15/303	266/15048	0.000332747	0.0188259	0.015357	SFRP1/RHOBTB3/SLIT2/KITLG/SIX4/SOX15/HOXA13/TCF21/IDH1/NKX3-1/LHFPL2/OSR1/TBX3/SEMA3A/FST	15	NAF Up (396)	NAF Up (396)
GOBP_ROOF_OF_MOUTH_DEVELOPMENT	GOBP_ROOF_OF_MOUTH_DEVELOPMENT	8/303	86/15048	0.000335108	0.0188259	0.015357	DHRS3/TGFBR3/BNC2/TSHZ1/TGFBR2/TCF21/OSR1/TBX3	8	NAF Up (396)	NAF Up (396)
GOBP_POSITIVE_REGULATION_OF_CHEMOTAXIS	GOBP_POSITIVE_REGULATION_OF_CHEMOTAXIS	13/483	135/15048	0.000404713	0.0189216	0.0163987	NTF3/OXSR1/DNM1L/THBS1/PTK2/EDN1/SEMA5A/CDH13/SERPINE1/LGMN/PDGFRB/VEGFC/SCG2	13	CAF2 Up (679)	CAF2 Up (679)
GOBP_CARDIAC_CHAMBER_DEVELOPMENT	GOBP_CARDIAC_CHAMBER_DEVELOPMENT	11/303	158/15048	0.000359151	0.019166	0.0156345	DHRS3/TGFBR3/FOXF1/SLIT2/LY6E/HOXA13/SMAD6/TGFBR2/ISL1/NRP1/TBX3	11	NAF Up (396)	NAF Up (396)
GOBP_ALCOHOL_BIOSYNTHETIC_PROCESS	GOBP_ALCOHOL_BIOSYNTHETIC_PROCESS	10/303	133/15048	0.000359439	0.019166	0.0156345	SREBF1/MOXD1/TM7SF2/SNCA/LSS/CYP27A1/ITPKA/SPTLC3/G6PD/HRH1	10	NAF Up (396)	NAF Up (396)
GOBP_DIGESTIVE_SYSTEM_DEVELOPMENT	GOBP_DIGESTIVE_SYSTEM_DEVELOPMENT	10/303	133/15048	0.000359439	0.019166	0.0156345	SFRP1/SMAD3/FOXF1/IL6ST/HOXA13/TGFBR2/TCF21/HOXA5/RARB/ASS1	10	NAF Up (396)	NAF Up (396)
GOBP_MUSCLE_CONTRACTION	GOBP_MUSCLE_CONTRACTION	23/483	330/15048	0.000427562	0.0197336	0.0171025	KCNE4/DSP/CRYAB/KIT/DMPK/SNTA1/CALM1/DOCK5/EDN1/EHD3/SGCA/ENO1/SMAD7/PPP1R13L/SNTB1/MYH11/TPM1/OXTR/ANXA6/ADA/MYOF/CALD1/ATP1B1	23	CAF2 Up (679)	CAF2 Up (679)
GOBP_NEGATIVE_REGULATION_OF_APOPTOTIC_SIGNALING_PATHWAY	GOBP_NEGATIVE_REGULATION_OF_APOPTOTIC_SIGNALING_PATHWAY	13/303	213/15048	0.000389668	0.0199075	0.0162394	LGALS3/STRADB/HMOX1/SOD2/HGF/GCLC/GCLM/EYA2/EYA1/FAIM2/NRP1/BDKRB2/IL7	13	NAF Up (396)	NAF Up (396)
GOBP_DEFINITIVE_HEMOPOIESIS	GOBP_DEFINITIVE_HEMOPOIESIS	4/303	18/15048	0.000394518	0.0199075	0.0162394	TGFBR3/GATA2/ZFP36L2/MEIS1	4	NAF Up (396)	NAF Up (396)
GOBP_RESPONSE_TO_FOLLICLE_STIMULATING_HORMONE	GOBP_RESPONSE_TO_FOLLICLE_STIMULATING_HORMONE	4/303	18/15048	0.000394518	0.0199075	0.0162394	TGFBR3/GCLC/GCLM/PLAT	4	NAF Up (396)	NAF Up (396)
GOBP_HEART_MORPHOGENESIS	GOBP_HEART_MORPHOGENESIS	14/303	242/15048	0.000404514	0.0199075	0.0162394	DHRS3/SMAD3/TGFBR3/FOXF1/S1PR1/SLIT2/LY6E/SMAD6/TGFBR2/EYA1/ISL1/NRP1/TBX3/HTR2B	14	NAF Up (396)	NAF Up (396)
GOBP_HEPATICOBILIARY_SYSTEM_DEVELOPMENT	GOBP_HEPATICOBILIARY_SYSTEM_DEVELOPMENT	10/303	135/15048	0.000404985	0.0199075	0.0162394	MDK/HMOX1/ACAT1/SMAD3/TGFBR3/TAF10/SOD2/HGF/MET/ASS1	10	NAF Up (396)	NAF Up (396)
GOBP_COLLAGEN_FIBRIL_ORGANIZATION	GOBP_COLLAGEN_FIBRIL_ORGANIZATION	8/483	57/15048	0.000440847	0.0200892	0.0174107	COL5A3/FOXC2/ADAMTS7/MMP11/LOXL3/COL5A1/P4HA1/COL5A2	8	CAF2 Up (679)	CAF2 Up (679)
GOBP_REGULATION_OF_ENDOTHELIAL_CELL_MIGRATION	GOBP_REGULATION_OF_ENDOTHELIAL_CELL_MIGRATION	17/483	210/15048	0.000446655	0.0200995	0.0174196	FGF1/FOXC2/THBS1/BCAR1/PTK2/EDN1/HIF1A/SASH1/SEMA5A/ETS1/MEF2C/LGMN/RHOJ/EGF/VEGFC/RHOB/EPHA2	17	CAF2 Up (679)	CAF2 Up (679)
GOBP_AORTIC_VALVE_MORPHOGENESIS	GOBP_AORTIC_VALVE_MORPHOGENESIS	6/483	32/15048	0.000471984	0.0202279	0.0175308	HEYL/JAG1/ELN/HEY2/SNAI2/SLIT3	6	CAF2 Up (679)	CAF2 Up (679)
GOBP_BASEMENT_MEMBRANE_ORGANIZATION	GOBP_BASEMENT_MEMBRANE_ORGANIZATION	6/483	32/15048	0.000471984	0.0202279	0.0175308	NTN4/CLASP2/MMP11/COL4A1/CAV2/SPINT2	6	CAF2 Up (679)	CAF2 Up (679)
GOBP_CHONDROITIN_SULFATE_PROTEOGLYCAN_METABOLIC_PROCESS	GOBP_CHONDROITIN_SULFATE_PROTEOGLYCAN_METABOLIC_PROCESS	6/483	32/15048	0.000471984	0.0202279	0.0175308	CHSY3/B3GALT6/CHST3/CHST7/UGDH/CHSY1	6	CAF2 Up (679)	CAF2 Up (679)
GOBP_RESPONSE_TO_FLUID_SHEAR_STRESS	GOBP_RESPONSE_TO_FLUID_SHEAR_STRESS	6/483	32/15048	0.000471984	0.0202279	0.0175308	KLF2/SMAD7/PKD2/MEF2C/CITED2/PDGFRB	6	CAF2 Up (679)	CAF2 Up (679)
GOBP_EMBRYONIC_PATTERN_SPECIFICATION	GOBP_EMBRYONIC_PATTERN_SPECIFICATION	7/303	68/15048	0.000424345	0.0205383	0.0167539	SMAD3/SMAD6/MEIS1/NRP1/MEIS2/TBX3/SEMA3A	7	NAF Up (396)	NAF Up (396)
GOBP_EPITHELIAL_TUBE_BRANCHING_INVOLVED_IN_LUNG_MORPHOGENESIS	GOBP_EPITHELIAL_TUBE_BRANCHING_INVOLVED_IN_LUNG_MORPHOGENESIS	4/159	29/15048	0.000231994	0.0205812	0.0171205	RDH10/WNT2/BMP4/FOXF1	4	CAF1 Up (191)	CAF1 Up (191)
GOBP_REGULATION_OF_MESENCHYMAL_CELL_PROLIFERATION	GOBP_REGULATION_OF_MESENCHYMAL_CELL_PROLIFERATION	4/159	29/15048	0.000231994	0.0205812	0.0171205	WNT2/BMP4/TGFBR2/FOXF1	4	CAF1 Up (191)	CAF1 Up (191)
GOBP_ACTIN_POLYMERIZATION_OR_DEPOLYMERIZATION	GOBP_ACTIN_POLYMERIZATION_OR_DEPOLYMERIZATION	15/483	174/15048	0.000495006	0.020678	0.0179209	DAAM2/CYFIP2/MICAL2/ESAM/ELN/ARPC5/DIAPH3/TMSB15A/ENAH/SEMA5A/EPS8/PDXP/PLEKHG2/FCHSD2/SPIRE1	15	CAF2 Up (679)	CAF2 Up (679)
GOBP_NEUROBLAST_PROLIFERATION	GOBP_NEUROBLAST_PROLIFERATION	8/483	58/15048	0.00049727	0.020678	0.0179209	HHIP/ID4/SMARCD3/HIF1A/DOCK7/NDE1/VEGFC/DAGLB	8	CAF2 Up (679)	CAF2 Up (679)
GOBP_NEURAL_PRECURSOR_CELL_PROLIFERATION	GOBP_NEURAL_PRECURSOR_CELL_PROLIFERATION	13/483	138/15048	0.000500393	0.020678	0.0179209	EPHB1/HHIP/ID4/SMARCD3/HIF1A/DOCK7/NDE1/EGF/LIMS2/VEGFC/DAGLB/NES/SPINT2	13	CAF2 Up (679)	CAF2 Up (679)
GOBP_CAMERA_TYPE_EYE_DEVELOPMENT	GOBP_CAMERA_TYPE_EYE_DEVELOPMENT	22/483	313/15048	0.000505461	0.020678	0.0179209	EPHB1/FOXC2/CRYAB/TFAP2A/JAG1/SOX11/SMARCD3/HIF1A/PPP1R13L/FBN1/RHOJ/NTRK2/RARA/FAT1/COL4A1/COL8A1/CITED2/PDGFRB/AGTPBP1/CASP2/NES/EPHA2	22	CAF2 Up (679)	CAF2 Up (679)
GOBP_REGULATION_OF_CHEMOTAXIS	GOBP_REGULATION_OF_CHEMOTAXIS	17/483	213/15048	0.000525626	0.0211716	0.0183487	NTF3/FGF1/OXSR1/DNM1L/SEMA5B/THBS1/PTK2/EDN1/SEMA5A/CDH13/SERPINE1/LGMN/PTPRO/PDGFRB/VEGFC/SEMA6A/SCG2	17	CAF2 Up (679)	CAF2 Up (679)
GOBP_ENDODERMAL_CELL_DIFFERENTIATION	GOBP_ENDODERMAL_CELL_DIFFERENTIATION	7/483	45/15048	0.000529682	0.0211716	0.0183487	FN1/ITGA7/COL4A2/COL5A1/COL8A1/ITGB5/COL5A2	7	CAF2 Up (679)	CAF2 Up (679)
GOBP_KIDNEY_EPITHELIUM_DEVELOPMENT	GOBP_KIDNEY_EPITHELIUM_DEVELOPMENT	13/483	139/15048	0.000536268	0.0211716	0.0183487	HEYL/FGF1/FOXC2/MYO1E/JAG1/FOXD1/SMAD7/PKD2/MEF2C/PODXL/PTPRO/STAT1/RARA	13	CAF2 Up (679)	CAF2 Up (679)
GOBP_GLAND_DEVELOPMENT	GOBP_GLAND_DEVELOPMENT	27/483	422/15048	0.000541053	0.0211716	0.0183487	PDGFA/CRIP1/FGF1/NTN4/SLC29A2/ID4/MAP2K1/ATP7B/SLC29A1/EDN1/FOXE1/HIF1A/PLXND1/FEM1B/MSN/PKD2/FADD/SNAI2/RARA/OXTR/E2F7/CITED2/EGF/ADA/LIMS2/EPHA2/HK2	27	CAF2 Up (679)	CAF2 Up (679)
GOBP_MUSCLE_CELL_PROLIFERATION	GOBP_MUSCLE_CELL_PROLIFERATION	17/483	214/15048	0.00055449	0.021424	0.0185675	EPHB1/FOXC2/TLR4/VGLL4/ELN/THBS1/NOTCH3/EDN1/HEY2/CDH13/MEF2C/STAT1/TPM1/HBEGF/MEF2D/CITED2/PDGFRB	17	CAF2 Up (679)	CAF2 Up (679)
GOBP_NEGATIVE_REGULATION_OF_CELL_SUBSTRATE_ADHESION	GOBP_NEGATIVE_REGULATION_OF_CELL_SUBSTRATE_ADHESION	8/483	59/15048	0.000559405	0.021424	0.0185675	CLASP2/JAG1/DLC1/THBS1/SERPINE1/PTPRO/ACTN4/CORO1C	8	CAF2 Up (679)	CAF2 Up (679)
GOBP_REGULATION_OF_MUSCLE_CONTRACTION	GOBP_REGULATION_OF_MUSCLE_CONTRACTION	14/483	158/15048	0.000574221	0.02176	0.0188586	DSP/KIT/DMPK/CALM1/DOCK5/EDN1/EHD3/ENO1/SMAD7/TPM1/OXTR/ANXA6/ADA/ATP1B1	14	CAF2 Up (679)	CAF2 Up (679)
GOBP_MUSCLE_HYPERTROPHY	GOBP_MUSCLE_HYPERTROPHY	8/303	90/15048	0.000456792	0.0217737	0.0177617	RGS2/SMAD3/PPARG/IL6ST/PARP1/PDE5A/G6PD/HTR2B	8	NAF Up (396)	NAF Up (396)
GOBP_ARTERY_MORPHOGENESIS	GOBP_ARTERY_MORPHOGENESIS	9/483	74/15048	0.000581869	0.0218201	0.0189107	FOXC2/JAG1/NOTCH3/EDN1/SMAD7/HEY2/PKD2/CITED2/PDGFRB	9	CAF2 Up (679)	CAF2 Up (679)
GOBP_REGULATION_OF_PLASMINOGEN_ACTIVATION	GOBP_REGULATION_OF_PLASMINOGEN_ACTIVATION	4/483	13/15048	0.000595007	0.0220827	0.0191384	THBS1/ENO1/CLEC3B/SERPINE1	4	CAF2 Up (679)	CAF2 Up (679)
GOBP_REGULATION_OF_CELL_ADHESION_MEDIATED_BY_INTEGRIN	GOBP_REGULATION_OF_CELL_ADHESION_MEDIATED_BY_INTEGRIN	7/483	46/15048	0.000607742	0.0223252	0.0193485	FOXC2/PTK2/SERPINE1/SNAI2/PODXL/ADA/EPHA2	7	CAF2 Up (679)	CAF2 Up (679)
GOBP_NADP_METABOLIC_PROCESS	GOBP_NADP_METABOLIC_PROCESS	5/303	33/15048	0.00047847	0.0224667	0.0183269	TKT/ME1/PGD/IDH1/G6PD	5	NAF Up (396)	NAF Up (396)
GOBP_RESPONSE_TO_HEPATOCYTE_GROWTH_FACTOR	GOBP_RESPONSE_TO_HEPATOCYTE_GROWTH_FACTOR	4/303	19/15048	0.000491848	0.0224823	0.0183397	HGF/GCLC/GCLM/NRP1	4	NAF Up (396)	NAF Up (396)
GOBP_REGULATION_OF_INFLAMMATORY_RESPONSE	GOBP_REGULATION_OF_INFLAMMATORY_RESPONSE	18/303	368/15048	0.000493095	0.0224823	0.0183397	MDK/GPX4/SMAD3/FOXF1/NINJ1/LRFN5/HGF/PPARG/IL6ST/PLK2/PYCARD/SNCA/NR1H3/NFKBIA/ISL1/PTGES/CAMK2N1/SERPINF1	18	NAF Up (396)	NAF Up (396)
GOBP_ACTOMYOSIN_STRUCTURE_ORGANIZATION	GOBP_ACTOMYOSIN_STRUCTURE_ORGANIZATION	12/303	191/15048	0.000500469	0.0224925	0.018348	SFRP1/SMAD3/ASAP3/S1PR1/LPAR1/SIX4/PGM5/TMOD1/MET/SDC4/NRP1/CGNL1	12	NAF Up (396)	NAF Up (396)
GOBP_DEVELOPMENT_OF_PRIMARY_SEXUAL_CHARACTERISTICS	GOBP_DEVELOPMENT_OF_PRIMARY_SEXUAL_CHARACTERISTICS	13/303	219/15048	0.000507623	0.0224927	0.0183482	SFRP1/RHOBTB3/SLIT2/KITLG/SIX4/SOX15/TCF21/IDH1/NKX3-1/LHFPL2/OSR1/SEMA3A/FST	13	NAF Up (396)	NAF Up (396)
GOBP_NEURAL_CREST_CELL_MIGRATION	GOBP_NEURAL_CREST_CELL_MIGRATION	8/483	60/15048	0.00062767	0.0225961	0.0195833	SEMA5B/FN1/EDN1/HIF1A/SEMA5A/CORO1C/ANXA6/SEMA6A	8	CAF2 Up (679)	CAF2 Up (679)
GOBP_SKELETAL_MUSCLE_CELL_DIFFERENTIATION	GOBP_SKELETAL_MUSCLE_CELL_DIFFERENTIATION	8/483	60/15048	0.00062767	0.0225961	0.0195833	HEYL/EPHB1/ANKRD1/SOX11/HMG20B/MEF2C/MEF2D/CITED2	8	CAF2 Up (679)	CAF2 Up (679)
GOBP_LYMPH_VESSEL_DEVELOPMENT	GOBP_LYMPH_VESSEL_DEVELOPMENT	4/159	30/15048	0.000265496	0.0227411	0.0189172	HEG1/SVEP1/ACVRL1/PDPN	4	CAF1 Up (191)	CAF1 Up (191)
GOBP_EMBRYONIC_ORGAN_DEVELOPMENT	GOBP_EMBRYONIC_ORGAN_DEVELOPMENT	20/303	434/15048	0.000521047	0.0227669	0.0185718	LRIG3/ALDH1A3/SMAD3/FOXF1/GATA2/TSHZ1/KITLG/SIX4/SOX15/TGFBR2/FBN2/TCF21/EYA1/PBX3/HOXA5/LRIG1/TTC39C/RARB/OSR1/TBX3	20	NAF Up (396)	NAF Up (396)
GOBP_RESPONSE_TO_STEROID_HORMONE	GOBP_RESPONSE_TO_STEROID_HORMONE	16/303	309/15048	0.000546039	0.0234598	0.0191371	SFRP1/PTGER2/MDK/SREBF1/SLIT2/ZFP36L2/TGFBR2/NR1H3/PARP1/TCF21/ISL1/IDH1/NKX3-1/PLAT/SERPINF1/ASS1	16	NAF Up (396)	NAF Up (396)
GOBP_NEGATIVE_REGULATION_OF_OSSIFICATION	GOBP_NEGATIVE_REGULATION_OF_OSSIFICATION	5/303	34/15048	0.00055182	0.0234598	0.0191371	SFRP1/MDK/SMAD6/LTBP3/ENPP1	5	NAF Up (396)	NAF Up (396)
GOBP_AGING	GOBP_AGING	11/159	295/15048	0.000302018	0.02377	0.0197731	PRNP/ASS1/APP/PICALM/FGF2/GCLM/TGFBR2/ADM/APOD/NFE2L2/GCLC	11	CAF1 Up (191)	CAF1 Up (191)
GOBP_ADHESION_OF_SYMBIONT_TO_HOST	GOBP_ADHESION_OF_SYMBIONT_TO_HOST	3/159	13/15048	0.000306293	0.02377	0.0197731	SCARB1/ICAM1/GAS6	3	CAF1 Up (191)	CAF1 Up (191)
GOBP_RESPONSE_TO_LAMINAR_FLUID_SHEAR_STRESS	GOBP_RESPONSE_TO_LAMINAR_FLUID_SHEAR_STRESS	3/159	13/15048	0.000306293	0.02377	0.0197731	ASS1/ABCA1/NFE2L2	3	CAF1 Up (191)	CAF1 Up (191)
GOBP_COLUMNAR_CUBOIDAL_EPITHELIAL_CELL_DIFFERENTIATION	GOBP_COLUMNAR_CUBOIDAL_EPITHELIAL_CELL_DIFFERENTIATION	6/159	87/15048	0.000315785	0.02377	0.0197731	SOX4/FAM20C/FGF2/BMP4/IL6ST/PRDM1	6	CAF1 Up (191)	CAF1 Up (191)
GOBP_FAT_CELL_DIFFERENTIATION	GOBP_FAT_CELL_DIFFERENTIATION	13/303	222/15048	0.000577135	0.0242089	0.0197481	SFRP1/RGS2/SREBF1/SMAD3/CEBPD/GATA2/SOD2/ZADH2/PPARG/ZFP36L2/SMAD6/ALDH6A1/ENPP1	13	NAF Up (396)	NAF Up (396)
GOBP_REGULATION_OF_LIPID_STORAGE	GOBP_REGULATION_OF_LIPID_STORAGE	6/303	52/15048	0.000592665	0.0245332	0.0200127	SREBF1/ABCA1/PPARG/ABHD5/NR1H3/NFKBIA	6	NAF Up (396)	NAF Up (396)
GOBP_CELL_PROLIFERATION_INVOLVED_IN_HEART_MORPHOGENESIS	GOBP_CELL_PROLIFERATION_INVOLVED_IN_HEART_MORPHOGENESIS	4/303	20/15048	0.000605128	0.0247238	0.0201682	TGFBR2/EYA1/ISL1/TBX3	4	NAF Up (396)	NAF Up (396)
GOBP_ODONTOGENESIS	GOBP_ODONTOGENESIS	7/159	124/15048	0.000344877	0.0251963	0.0209595	PERP/FAM20C/BMP4/ADAMTS5/ADM/LAMB1/FAM20A	7	CAF1 Up (191)	CAF1 Up (191)
GOBP_POSITIVE_CHEMOTAXIS	GOBP_POSITIVE_CHEMOTAXIS	5/159	58/15048	0.000360728	0.0256014	0.0212965	FGF2/BMP4/ITGA2/FGF7/F3	5	CAF1 Up (191)	CAF1 Up (191)
GOBP_REGULATION_OF_BONE_MINERALIZATION	GOBP_REGULATION_OF_BONE_MINERALIZATION	7/303	73/15048	0.000654774	0.0264092	0.021543	SMAD3/S1PR1/LTBP3/FBN2/ENPP1/FAM20C/OSR1	7	NAF Up (396)	NAF Up (396)
GOBP_NEGATIVE_REGULATION_OF_LOCOMOTION	GOBP_NEGATIVE_REGULATION_OF_LOCOMOTION	12/159	354/15048	0.000383672	0.0264734	0.0220219	PODN/DPP4/FGF2/FBLN1/IGFBP3/LIMCH1/ACVRL1/APOD/NFE2L2/DCN/PTPRK/SEMA3C	12	CAF1 Up (191)	CAF1 Up (191)
GOBP_REGULATION_OF_ANIMAL_ORGAN_MORPHOGENESIS	GOBP_REGULATION_OF_ANIMAL_ORGAN_MORPHOGENESIS	7/159	127/15048	0.00039875	0.0267702	0.0222688	PRICKLE2/WNT2/PRICKLE1/FGF2/BMP4/FGF7/PTK7	7	CAF1 Up (191)	CAF1 Up (191)
GOBP_NEGATIVE_REGULATION_OF_NEURON_DEATH	GOBP_NEGATIVE_REGULATION_OF_NEURON_DEATH	12/303	198/15048	0.000689367	0.0271623	0.0221573	MDK/HMOX1/SOD2/SIX4/GCLC/IL6ST/GCLM/SNCA/ISL1/FAIM2/NRP1/SERPINF1	12	NAF Up (396)	NAF Up (396)
GOBP_NEGATIVE_REGULATION_OF_PHOSPHORYLATION	GOBP_NEGATIVE_REGULATION_OF_PHOSPHORYLATION	17/303	347/15048	0.000690713	0.0271623	0.0221573	SFRP1/RGS2/FBLN1/SLIT2/PKIA/HGF/PPARG/SMAD6/PYCARD/SNCA/PPP2R5A/ENPP1/CAMK2N1/BDKRB2/CNKSR3/TRIB1/BDKRB1	17	NAF Up (396)	NAF Up (396)
GOBP_NEURAL_CREST_CELL_DIFFERENTIATION	GOBP_NEURAL_CREST_CELL_DIFFERENTIATION	8/303	96/15048	0.000704371	0.0273574	0.0223165	SFRP1/KITLG/SEMA3B/SEMA4B/ISL1/NRP1/SEMA3A/HTR2B	8	NAF Up (396)	NAF Up (396)
GOBP_CARDIAC_VENTRICLE_DEVELOPMENT	GOBP_CARDIAC_VENTRICLE_DEVELOPMENT	9/303	120/15048	0.000716203	0.0274777	0.0224147	TGFBR3/FOXF1/SLIT2/LY6E/HOXA13/SMAD6/TGFBR2/ISL1/TBX3	9	NAF Up (396)	NAF Up (396)
GOBP_NEGATIVE_REGULATION_OF_FAT_CELL_DIFFERENTIATION	GOBP_NEGATIVE_REGULATION_OF_FAT_CELL_DIFFERENTIATION	6/303	54/15048	0.000727016	0.0275565	0.0224789	SMAD3/GATA2/SOD2/ZADH2/ZFP36L2/ENPP1	6	NAF Up (396)	NAF Up (396)
GOBP_MORPHOGENESIS_OF_AN_EPITHELIAL_BUD	GOBP_MORPHOGENESIS_OF_AN_EPITHELIAL_BUD	3/159	15/15048	0.000479772	0.0294244	0.0244767	RDH10/WNT2/BMP4	3	CAF1 Up (191)	CAF1 Up (191)
GOBP_DIGESTIVE_SYSTEM_DEVELOPMENT	GOBP_DIGESTIVE_SYSTEM_DEVELOPMENT	7/159	133/15048	0.000526656	0.0294244	0.0244767	ASS1/RARRES2/BMP4/TGFBR2/IL6ST/PRDM1/FOXF1	7	CAF1 Up (191)	CAF1 Up (191)
GOBP_ANIMAL_ORGAN_FORMATION	GOBP_ANIMAL_ORGAN_FORMATION	5/159	63/15048	0.000530398	0.0294244	0.0244767	RDH10/WNT2/FGF2/BMP4/TGFBR2	5	CAF1 Up (191)	CAF1 Up (191)
GOBP_GLUTATHIONE_METABOLIC_PROCESS	GOBP_GLUTATHIONE_METABOLIC_PROCESS	5/159	63/15048	0.000530398	0.0294244	0.0244767	GCLM/NFE2L2/CTNS/GCLC/CLIC3	5	CAF1 Up (191)	CAF1 Up (191)
GOBP_NEGATIVE_REGULATION_OF_EXTRINSIC_APOPTOTIC_SIGNALING_PATHWAY	GOBP_NEGATIVE_REGULATION_OF_EXTRINSIC_APOPTOTIC_SIGNALING_PATHWAY	6/159	96/15048	0.000536294	0.0294244	0.0244767	ICAM1/GCLM/BMP4/IFI6/TMBIM1/GCLC	6	CAF1 Up (191)	CAF1 Up (191)
GOBP_TERPENOID_METABOLIC_PROCESS	GOBP_TERPENOID_METABOLIC_PROCESS	6/159	96/15048	0.000536294	0.0294244	0.0244767	ALDH1A1/DHRS3/RDH10/RARRES2/ALDH1A3/SCPEP1	6	CAF1 Up (191)	CAF1 Up (191)
GOBP_REGULATION_OF_BODY_FLUID_LEVELS	GOBP_REGULATION_OF_BODY_FLUID_LEVELS	12/159	368/15048	0.000542346	0.0294244	0.0244767	HEG1/AK3/TYRO3/FBLN1/IL6ST/ADM/GAS6/PDPN/NFE2L2/ITGA2/F3/VTN	12	CAF1 Up (191)	CAF1 Up (191)
GOBP_EPITHELIAL_TUBE_FORMATION	GOBP_EPITHELIAL_TUBE_FORMATION	7/159	134/15048	0.000550833	0.0294244	0.0244767	LMO4/SOX4/PRICKLE1/FGF2/BMP4/ADM/PTK7	7	CAF1 Up (191)	CAF1 Up (191)
GOBP_POSITIVE_REGULATION_OF_OSTEOBLAST_DIFFERENTIATION	GOBP_POSITIVE_REGULATION_OF_OSTEOBLAST_DIFFERENTIATION	5/159	64/15048	0.000570496	0.0294244	0.0244767	FAM20C/FGF2/BMP4/IL6ST/CEBPD	5	CAF1 Up (191)	CAF1 Up (191)
GOBP_REGULATION_OF_MITOCHONDRIAL_MEMBRANE_POTENTIAL	GOBP_REGULATION_OF_MITOCHONDRIAL_MEMBRANE_POTENTIAL	5/159	64/15048	0.000570496	0.0294244	0.0244767	GCLM/IFI6/DCN/CTNS/GCLC	5	CAF1 Up (191)	CAF1 Up (191)
GOBP_CELLULAR_COPPER_ION_HOMEOSTASIS	GOBP_CELLULAR_COPPER_ION_HOMEOSTASIS	3/159	16/15048	0.000585923	0.0294244	0.0244767	PRNP/SLC31A1/APP	3	CAF1 Up (191)	CAF1 Up (191)
GOBP_CELLULAR_RESPONSE_TO_THYROID_HORMONE_STIMULUS	GOBP_CELLULAR_RESPONSE_TO_THYROID_HORMONE_STIMULUS	3/159	16/15048	0.000585923	0.0294244	0.0244767	GCLM/CTSB/GCLC	3	CAF1 Up (191)	CAF1 Up (191)
GOBP_CELLULAR_HORMONE_METABOLIC_PROCESS	GOBP_CELLULAR_HORMONE_METABOLIC_PROCESS	7/159	136/15048	0.000601834	0.0294244	0.0244767	ALDH1A1/DHRS3/RDH10/HSD17B6/ADM/ALDH1A3/SCPEP1	7	CAF1 Up (191)	CAF1 Up (191)
GOBP_CARDIAC_EPITHELIAL_TO_MESENCHYMAL_TRANSITION	GOBP_CARDIAC_EPITHELIAL_TO_MESENCHYMAL_TRANSITION	4/159	37/15048	0.000604125	0.0294244	0.0244767	WNT2/BMP4/TGFBR2/ACVRL1	4	CAF1 Up (191)	CAF1 Up (191)
GOBP_ARTERY_DEVELOPMENT	GOBP_ARTERY_DEVELOPMENT	6/159	99/15048	0.00063163	0.0296242	0.0246429	SOX4/PRICKLE1/BMP4/ACVRL1/PRDM1/FOXF1	6	CAF1 Up (191)	CAF1 Up (191)
GOBP_CELLULAR_MODIFIED_AMINO_ACID_METABOLIC_PROCESS	GOBP_CELLULAR_MODIFIED_AMINO_ACID_METABOLIC_PROCESS	8/159	179/15048	0.000632078	0.0296242	0.0246429	ASS1/GCLM/CTSB/NFE2L2/OSBPL10/CTNS/GCLC/CLIC3	8	CAF1 Up (191)	CAF1 Up (191)
GOBP_SEGMENTATION	GOBP_SEGMENTATION	8/303	98/15048	0.000807524	0.0299232	0.0244095	SFRP1/SMAD3/FOXF1/NRP1/NKX3-1/OSR1/TBX3/SEMA3A	8	NAF Up (396)	NAF Up (396)
GOBP_NEGATIVE_REGULATION_OF_CELL_PROJECTION_ORGANIZATION	GOBP_NEGATIVE_REGULATION_OF_CELL_PROJECTION_ORGANIZATION	11/303	174/15048	0.000808478	0.0299232	0.0244095	NR2F1/EPHA4/SLIT2/LPAR1/SEMA3B/SEMA4B/MYLIP/NLGN1/NRP1/SEMA3A/FGF13	11	NAF Up (396)	NAF Up (396)
GOBP_HORMONE_METABOLIC_PROCESS	GOBP_HORMONE_METABOLIC_PROCESS	9/159	225/15048	0.000651158	0.0299533	0.0249166	ALDH1A1/DHRS3/RDH10/DPP4/CTSB/HSD17B6/ADM/ALDH1A3/SCPEP1	9	CAF1 Up (191)	CAF1 Up (191)
GOBP_NEURON_PROJECTION_EXTENSION_INVOLVED_IN_NEURON_PROJECTION_GUIDANCE	GOBP_NEURON_PROJECTION_EXTENSION_INVOLVED_IN_NEURON_PROJECTION_GUIDANCE	5/303	37/15048	0.000822893	0.0301026	0.0245559	SLIT2/SEMA3B/SEMA4B/NRP1/SEMA3A	5	NAF Up (396)	NAF Up (396)
GOBP_NEGATIVE_REGULATION_OF_MYELOID_CELL_DIFFERENTIATION	GOBP_NEGATIVE_REGULATION_OF_MYELOID_CELL_DIFFERENTIATION	7/303	76/15048	0.000834679	0.0301828	0.0246213	SFRP1/GATA2/MEIS1/NFKBIA/HOXA5/MEIS2/TRIB1	7	NAF Up (396)	NAF Up (396)
GOBP_GLAND_MORPHOGENESIS	GOBP_GLAND_MORPHOGENESIS	9/303	123/15048	0.000855383	0.0305222	0.0248981	SFRP1/MDK/HGF/HOXA13/TGFBR2/NRP1/NKX3-1/TBX3/SEMA3A	9	NAF Up (396)	NAF Up (396)
GOBP_INNER_EAR_MORPHOGENESIS	GOBP_INNER_EAR_MORPHOGENESIS	8/303	99/15048	0.000863469	0.0305222	0.0248981	LRIG3/ALDH1A3/GATA2/SIX4/EYA1/LRIG1/TTC39C/TBX3	8	NAF Up (396)	NAF Up (396)
GOBP_MESENCHYME_MORPHOGENESIS	GOBP_MESENCHYME_MORPHOGENESIS	6/303	56/15048	0.000883778	0.0305993	0.024961	SMAD3/FOXF1/TGFBR2/ISL1/OSR1/TBX3	6	NAF Up (396)	NAF Up (396)
GOBP_NEGATIVE_REGULATION_OF_MUSCLE_CONTRACTION	GOBP_NEGATIVE_REGULATION_OF_MUSCLE_CONTRACTION	4/303	22/15048	0.000885103	0.0305993	0.024961	RGS2/BIN1/PDE5A/KCNMA1	4	NAF Up (396)	NAF Up (396)
GOBP_NEGATIVE_REGULATION_OF_PROTEOLYSIS	GOBP_NEGATIVE_REGULATION_OF_PROTEOLYSIS	16/303	324/15048	0.000906812	0.031009	0.0252953	LXN/EPHA4/RARRES1/BIN1/HGF/TNFAIP8/RPS7/COL6A3/SNCA/NR1H3/GAS1/TIMP4/CTSB/PLAT/SERPINF1/PROS1	16	NAF Up (396)	NAF Up (396)
GOBP_POSITIVE_REGULATION_OF_STEROL_TRANSPORT	GOBP_POSITIVE_REGULATION_OF_STEROL_TRANSPORT	5/303	38/15048	0.000932156	0.0315329	0.0257227	ABCA1/PPARG/PLTP/NR1H3/NFKBIA	5	NAF Up (396)	NAF Up (396)
GOBP_NEGATIVE_REGULATION_OF_CELL_ACTIVATION	GOBP_NEGATIVE_REGULATION_OF_CELL_ACTIVATION	12/303	206/15048	0.000975039	0.0326327	0.0266198	SFRP1/LGALS3/MDK/HMOX1/FOXF1/LRFN5/CD9/GCLC/TNFRSF14/NR1H3/PDE5A/SDC4	12	NAF Up (396)	NAF Up (396)
GOBP_OSSIFICATION	GOBP_OSSIFICATION	18/303	391/15048	0.000994279	0.0329263	0.0268593	SFRP1/MDK/DHRS3/SMAD3/CEBPD/S1PR1/HGF/PPARG/IL6ST/SMAD6/LTBP3/FBN2/KAZALD1/ENPP1/TWIST2/FAM20C/FASN/OSR1	18	NAF Up (396)	NAF Up (396)
GOBP_NEURAL_TUBE_FORMATION	GOBP_NEURAL_TUBE_FORMATION	6/159	102/15048	0.000739615	0.0334037	0.0277869	LMO4/SOX4/PRICKLE1/BMP4/ADM/PTK7	6	CAF1 Up (191)	CAF1 Up (191)
GOBP_CARDIAC_SEPTUM_MORPHOGENESIS	GOBP_CARDIAC_SEPTUM_MORPHOGENESIS	5/159	68/15048	0.000754017	0.033446	0.0278221	DHRS3/SOX4/BMP4/TGFBR2/SEMA3C	5	CAF1 Up (191)	CAF1 Up (191)
GOBP_RESPONSE_TO_PROSTAGLANDIN_E	GOBP_RESPONSE_TO_PROSTAGLANDIN_E	4/303	23/15048	0.0010546	0.0345529	0.0281862	SFRP1/GNG2/PTGER2/TGFBR3	4	NAF Up (396)	NAF Up (396)
GOBP_POSITIVE_CHEMOTAXIS	GOBP_POSITIVE_CHEMOTAXIS	6/303	58/15048	0.00106536	0.0345529	0.0281862	LGALS3/SMAD3/S1PR1/HGF/MET/NRP1	6	NAF Up (396)	NAF Up (396)
GOBP_NONRIBOSOMAL_PEPTIDE_BIOSYNTHETIC_PROCESS	GOBP_NONRIBOSOMAL_PEPTIDE_BIOSYNTHETIC_PROCESS	3/159	18/15048	0.000840631	0.0360022	0.0299484	GCLM/NFE2L2/GCLC	3	CAF1 Up (191)	CAF1 Up (191)
GOBP_TRACHEA_DEVELOPMENT	GOBP_TRACHEA_DEVELOPMENT	3/159	18/15048	0.000840631	0.0360022	0.0299484	BMP4/TGFBR2/FOXF1	3	CAF1 Up (191)	CAF1 Up (191)
GOBP_LIPID_STORAGE	GOBP_LIPID_STORAGE	7/303	80/15048	0.00113287	0.0363674	0.0296664	SREBF1/ABCA1/PPARG/ABHD5/NR1H3/ENPP1/NFKBIA	7	NAF Up (396)	NAF Up (396)
GOBP_REGULATION_OF_PEPTIDASE_ACTIVITY	GOBP_REGULATION_OF_PEPTIDASE_ACTIVITY	19/303	430/15048	0.00117563	0.036848	0.0300584	LXN/PERP/EPHA4/SMAD3/RARRES1/FBLN1/BIN1/HGF/TNFAIP8/PPARG/PCOLCE/PYCARD/COL6A3/SNCA/TIMP4/CTSB/NKX3-1/SERPINF1/PROS1	19	NAF Up (396)	NAF Up (396)
GOBP_NEGATIVE_REGULATION_OF_CHOLESTEROL_STORAGE	GOBP_NEGATIVE_REGULATION_OF_CHOLESTEROL_STORAGE	3/303	11/15048	0.00118298	0.036848	0.0300584	ABCA1/PPARG/NR1H3	3	NAF Up (396)	NAF Up (396)
GOBP_ALCOHOL_METABOLIC_PROCESS	GOBP_ALCOHOL_METABOLIC_PROCESS	11/159	340/15048	0.000984297	0.0399843	0.033261	ALDH1A1/DHRS3/RDH10/SCARB1/APP/FGF2/ABCA1/CYP27A1/MOXD1/ALDH1A3/IMPA2	11	CAF1 Up (191)	CAF1 Up (191)
GOBP_TISSUE_MIGRATION	GOBP_TISSUE_MIGRATION	11/159	340/15048	0.000984297	0.0399843	0.033261	SCARB1/DPP4/FGF2/BMP4/TGFBR2/ACVRL1/NFE2L2/DCN/ITGA2/FGF7/FOXF1	11	CAF1 Up (191)	CAF1 Up (191)
GOBP_COPPER_ION_HOMEOSTASIS	GOBP_COPPER_ION_HOMEOSTASIS	3/159	19/15048	0.000990541	0.0399843	0.033261	PRNP/SLC31A1/APP	3	CAF1 Up (191)	CAF1 Up (191)
GOBP_CELLULAR_RESPONSE_TO_TOXIC_SUBSTANCE	GOBP_CELLULAR_RESPONSE_TO_TOXIC_SUBSTANCE	6/159	108/15048	0.000997998	0.0399843	0.033261	ALDH1A1/FBLN5/NXN/GLRX/TXNRD1/NFE2L2	6	CAF1 Up (191)	CAF1 Up (191)
GOBP_REGULATION_OF_EXTRINSIC_APOPTOTIC_SIGNALING_PATHWAY	GOBP_REGULATION_OF_EXTRINSIC_APOPTOTIC_SIGNALING_PATHWAY	7/159	149/15048	0.00103178	0.0404238	0.0336266	ICAM1/GCLM/BMP4/IFI6/TMBIM1/LTBR/GCLC	7	CAF1 Up (191)	CAF1 Up (191)
GOBP_GLUTAMINE_FAMILY_AMINO_ACID_METABOLIC_PROCESS	GOBP_GLUTAMINE_FAMILY_AMINO_ACID_METABOLIC_PROCESS	5/159	73/15048	0.00104152	0.0404238	0.0336266	ASS1/GCLM/SLC39A8/SLC7A7/GCLC	5	CAF1 Up (191)	CAF1 Up (191)
GOBP_NEURAL_TUBE_DEVELOPMENT	GOBP_NEURAL_TUBE_DEVELOPMENT	7/159	150/15048	0.00107285	0.0409995	0.0341055	LMO4/SOX4/PRICKLE1/BMP4/ADM/PTK7/SEMA3C	7	CAF1 Up (191)	CAF1 Up (191)
GOBP_HEART_MORPHOGENESIS	GOBP_HEART_MORPHOGENESIS	9/159	242/15048	0.00109033	0.0410361	0.0341359	DHRS3/SOX4/HEG1/WNT2/BMP4/TGFBR2/ACVRL1/FOXF1/SEMA3C	9	CAF1 Up (191)	CAF1 Up (191)
GOBP_ARTERY_MORPHOGENESIS	GOBP_ARTERY_MORPHOGENESIS	5/159	74/15048	0.00110759	0.0410636	0.0341587	SOX4/BMP4/ACVRL1/PRDM1/FOXF1	5	CAF1 Up (191)	CAF1 Up (191)
GOBP_ARGININE_METABOLIC_PROCESS	GOBP_ARGININE_METABOLIC_PROCESS	3/159	20/15048	0.00115635	0.0415729	0.0345824	ASS1/SLC39A8/SLC7A7	3	CAF1 Up (191)	CAF1 Up (191)
GOBP_CARDIAC_RIGHT_VENTRICLE_MORPHOGENESIS	GOBP_CARDIAC_RIGHT_VENTRICLE_MORPHOGENESIS	3/159	20/15048	0.00115635	0.0415729	0.0345824	SOX4/BMP4/SEMA3C	3	CAF1 Up (191)	CAF1 Up (191)
GOBP_ORGANIC_HYDROXY_COMPOUND_CATABOLIC_PROCESS	GOBP_ORGANIC_HYDROXY_COMPOUND_CATABOLIC_PROCESS	5/159	75/15048	0.00117673	0.0415729	0.0345824	SCARB1/CYP27A1/HSD17B6/MOXD1/IMPA2	5	CAF1 Up (191)	CAF1 Up (191)
GOBP_NEGATIVE_REGULATION_OF_TRANSFERASE_ACTIVITY	GOBP_NEGATIVE_REGULATION_OF_TRANSFERASE_ACTIVITY	9/159	245/15048	0.00118828	0.0415729	0.0345824	RGS2/STK38/HEG1/CAMK2N1/PIK3IP1/BMP4/GPRC5A/TERF1/ORMDL3	9	CAF1 Up (191)	CAF1 Up (191)
GOBP_EXTRACELLULAR_MATRIX_ASSEMBLY	GOBP_EXTRACELLULAR_MATRIX_ASSEMBLY	4/159	45/15048	0.0012765	0.0440394	0.0366342	FBLN5/LAMB1/GAS6/ANTXR1	4	CAF1 Up (191)	CAF1 Up (191)
GOBP_ISOPRENOID_METABOLIC_PROCESS	GOBP_ISOPRENOID_METABOLIC_PROCESS	6/159	114/15048	0.00132077	0.0449358	0.0373799	ALDH1A1/DHRS3/RDH10/RARRES2/ALDH1A3/SCPEP1	6	CAF1 Up (191)	CAF1 Up (191)
GOBP_CELL_MIGRATION_INVOLVED_IN_HEART_DEVELOPMENT	GOBP_CELL_MIGRATION_INVOLVED_IN_HEART_DEVELOPMENT	3/159	21/15048	0.00133867	0.0449358	0.0373799	BMP4/FLRT3/SEMA3C	3	CAF1 Up (191)	CAF1 Up (191)
GOBP_REGULATION_OF_MEMBRANE_DEPOLARIZATION	GOBP_REGULATION_OF_MEMBRANE_DEPOLARIZATION	4/159	46/15048	0.0013867	0.045867	0.0381545	GCLM/IFI6/DCN/GCLC	4	CAF1 Up (191)	CAF1 Up (191)
GOBP_FOCAL_ADHESION_ASSEMBLY	GOBP_FOCAL_ADHESION_ASSEMBLY	5/159	78/15048	0.00140334	0.045867	0.0381545	LIMCH1/ACVRL1/APOD/ITGA2/PTPRK	5	CAF1 Up (191)	CAF1 Up (191)
GOBP_FORMATION_OF_PRIMARY_GERM_LAYER	GOBP_FORMATION_OF_PRIMARY_GERM_LAYER	6/159	116/15048	0.00144437	0.0459977	0.0382632	BMP4/TXNRD1/LAMB1/ITGA2/FOXF1/VTN	6	CAF1 Up (191)	CAF1 Up (191)
GOBP_RESPONSE_TO_FIBROBLAST_GROWTH_FACTOR	GOBP_RESPONSE_TO_FIBROBLAST_GROWTH_FACTOR	6/159	116/15048	0.00144437	0.0459977	0.0382632	FAM20C/FGF2/GCLM/FGF7/GCLC/FLRT3	6	CAF1 Up (191)	CAF1 Up (191)
GOBP_BRANCHING_INVOLVED_IN_SALIVARY_GLAND_MORPHOGENESIS	GOBP_BRANCHING_INVOLVED_IN_SALIVARY_GLAND_MORPHOGENESIS	3/159	22/15048	0.00153809	0.0483621	0.04023	TGM2/FGF7/SEMA3C	3	CAF1 Up (191)	CAF1 Up (191)
GOBP_LENS_DEVELOPMENT_IN_CAMERA_TYPE_EYE	GOBP_LENS_DEVELOPMENT_IN_CAMERA_TYPE_EYE	5/159	80/15048	0.0015713	0.0486553	0.040474	WNT2/FGF2/BMP4/TGFBR2/CTNS	5	CAF1 Up (191)	CAF1 Up (191)
GOBP_NEGATIVE_REGULATION_OF_LEUKOCYTE_APOPTOTIC_PROCESS	GOBP_NEGATIVE_REGULATION_OF_LEUKOCYTE_APOPTOTIC_PROCESS	4/159	48/15048	0.00162669	0.0486553	0.040474	BMP4/ST3GAL1/GAS6/ORMDL3	4	CAF1 Up (191)	CAF1 Up (191)
GOBP_MUCOPOLYSACCHARIDE_METABOLIC_PROCESS	GOBP_MUCOPOLYSACCHARIDE_METABOLIC_PROCESS	5/159	82/15048	0.00175359	0.0486553	0.040474	B4GALT4/FGF2/GLCE/ST3GAL1/DCN	5	CAF1 Up (191)	CAF1 Up (191)
GOBP_AMELOGENESIS	GOBP_AMELOGENESIS	3/159	23/15048	0.00175517	0.0486553	0.040474	PERP/FAM20C/FAM20A	3	CAF1 Up (191)	CAF1 Up (191)
GOBP_LYMPH_VESSEL_MORPHOGENESIS	GOBP_LYMPH_VESSEL_MORPHOGENESIS	3/159	23/15048	0.00175517	0.0486553	0.040474	SVEP1/ACVRL1/PDPN	3	CAF1 Up (191)	CAF1 Up (191)
GOBP_MORPHOGENESIS_OF_AN_EPITHELIAL_FOLD	GOBP_MORPHOGENESIS_OF_AN_EPITHELIAL_FOLD	3/159	23/15048	0.00175517	0.0486553	0.040474	RDH10/WNT2/BMP4	3	CAF1 Up (191)	CAF1 Up (191)
GOBP_NATURAL_KILLER_CELL_DIFFERENTIATION	GOBP_NATURAL_KILLER_CELL_DIFFERENTIATION	3/159	23/15048	0.00175517	0.0486553	0.040474	TYRO3/PRDM1/GAS6	3	CAF1 Up (191)	CAF1 Up (191)
GOBP_POSITIVE_REGULATION_OF_MESENCHYMAL_CELL_PROLIFERATION	GOBP_POSITIVE_REGULATION_OF_MESENCHYMAL_CELL_PROLIFERATION	3/159	23/15048	0.00175517	0.0486553	0.040474	WNT2/TGFBR2/FOXF1	3	CAF1 Up (191)	CAF1 Up (191)
GOBP_ENDOCARDIAL_CUSHION_DEVELOPMENT	GOBP_ENDOCARDIAL_CUSHION_DEVELOPMENT	4/159	49/15048	0.00175688	0.0486553	0.040474	BMP4/TGFBR2/ACVRL1/FOXF1	4	CAF1 Up (191)	CAF1 Up (191)
GOBP_POSITIVE_REGULATION_OF_PATHWAY_RESTRICTED_SMAD_PROTEIN_PHOSPHORYLATION	GOBP_POSITIVE_REGULATION_OF_PATHWAY_RESTRICTED_SMAD_PROTEIN_PHOSPHORYLATION	4/159	49/15048	0.00175688	0.0486553	0.040474	BMP4/TGFBR2/ACVRL1/GDF15	4	CAF1 Up (191)	CAF1 Up (191)
GOBP_GLAND_DEVELOPMENT	GOBP_GLAND_DEVELOPMENT	12/159	422/15048	0.00176287	0.0486553	0.040474	LMO4/TGM2/ASS1/WNT2/FGF2/BMP4/TGFBR2/ITGA2/FGF7/ALDH1A3/FOXF1/SEMA3C	12	CAF1 Up (191)	CAF1 Up (191)
GOBP_POSITIVE_REGULATION_OF_EPITHELIAL_CELL_MIGRATION	GOBP_POSITIVE_REGULATION_OF_EPITHELIAL_CELL_MIGRATION	7/159	164/15048	0.00179466	0.0489884	0.040751	SCARB1/FGF2/BMP4/TGFBR2/NFE2L2/ITGA2/FGF7	7	CAF1 Up (191)	CAF1 Up (191)
GOBP_RETINOL_METABOLIC_PROCESS	GOBP_RETINOL_METABOLIC_PROCESS	4/159	50/15048	0.00189413	0.0506834	0.042161	ALDH1A1/DHRS3/RDH10/ALDH1A3	4	CAF1 Up (191)	CAF1 Up (191)
GOBP_CELLULAR_RESPONSE_TO_COPPER_ION	GOBP_CELLULAR_RESPONSE_TO_COPPER_ION	3/159	24/15048	0.00199046	0.0506834	0.042161	PRNP/APP/NFE2L2	3	CAF1 Up (191)	CAF1 Up (191)
GOBP_NEUROEPITHELIAL_CELL_DIFFERENTIATION	GOBP_NEUROEPITHELIAL_CELL_DIFFERENTIATION	3/159	24/15048	0.00199046	0.0506834	0.042161	SOX4/FAM20C/FGF2	3	CAF1 Up (191)	CAF1 Up (191)
GOBP_ORGAN_INDUCTION	GOBP_ORGAN_INDUCTION	3/159	24/15048	0.00199046	0.0506834	0.042161	WNT2/FGF2/BMP4	3	CAF1 Up (191)	CAF1 Up (191)
GOBP_APOPTOTIC_CELL_CLEARANCE	GOBP_APOPTOTIC_CELL_CLEARANCE	4/159	51/15048	0.00203863	0.0506834	0.042161	TGM2/SCARB1/TYRO3/GAS6	4	CAF1 Up (191)	CAF1 Up (191)
GOBP_REGULATION_OF_EMBRYONIC_DEVELOPMENT	GOBP_REGULATION_OF_EMBRYONIC_DEVELOPMENT	4/159	51/15048	0.00203863	0.0506834	0.042161	LAMA4/LAMA2/WNT2/NFE2L2	4	CAF1 Up (191)	CAF1 Up (191)
GOBP_REGULATION_OF_MYOBLAST_DIFFERENTIATION	GOBP_REGULATION_OF_MYOBLAST_DIFFERENTIATION	4/159	51/15048	0.00203863	0.0506834	0.042161	BOC/PRICKLE1/IGFBP3/BMP4	4	CAF1 Up (191)	CAF1 Up (191)
GOBP_SULFUR_COMPOUND_METABOLIC_PROCESS	GOBP_SULFUR_COMPOUND_METABOLIC_PROCESS	10/159	318/15048	0.00205316	0.0506834	0.042161	TPST1/B4GALT4/GCLM/GLCE/ST3GAL1/NFE2L2/DCN/CTNS/GCLC/CLIC3	10	CAF1 Up (191)	CAF1 Up (191)
GOBP_POSITIVE_REGULATION_OF_VASCULATURE_DEVELOPMENT	GOBP_POSITIVE_REGULATION_OF_VASCULATURE_DEVELOPMENT	7/159	168/15048	0.00205792	0.0506834	0.042161	FGF2/TGFBR2/ACVRL1/ADM/NFE2L2/F3/NINJ1	7	CAF1 Up (191)	CAF1 Up (191)
HALLMARK_EPITHELIAL_MESENCHYMAL_TRANSITION	HALLMARK_EPITHELIAL_MESENCHYMAL_TRANSITION	36/217	195/4171	6.81252e-12	3.27001e-10	2.79672e-10	COL5A3/FOXC2/ELN/THBS1/GLIPR1/CD59/FN1/PMEPA1/RGS4/COL4A2/GEM/PLOD1/SNTB1/FBN1/SERPINE1/SNAI2/MAGEE1/GADD45B/ENO2/TPM1/COL5A1/OXTR/COL4A1/EDIL3/PDGFRB/SPP1/CALD1/ITGB5/ECM2/COL5A2/VEGFC/SLIT3/RHOB/HTRA1/SCG2/FSTL3	36	CAF2 Up (679)	CAF2 Up (679)
HALLMARK_HYPOXIA	HALLMARK_HYPOXIA	30/217	188/4171	1.76871e-08	4.24489e-07	3.6305e-07	TPST2/UGP2/SDC2/LDHA/B3GALT6/ENO1/CHST3/STC2/TPI1/ETS1/SERPINE1/MYH9/GBE1/PPFIA4/PDK3/ENO2/TIPARP/COL5A1/MAP3K1/TMEM45A/PFKP/CITED2/PGK1/CSRP2/P4HA1/ANGPTL4/SLC2A1/GPC4/HK2/PGM2	30	CAF2 Up (679)	CAF2 Up (679)
HALLMARK_UV_RESPONSE_DN	HALLMARK_UV_RESPONSE_DN	21/217	134/4171	3.91094e-06	6.2575e-05	5.35181e-05	KIT/SDC2/NEK7/SCHIP1/DLC1/ATXN1/SMAD7/PDLIM5/RGS4/SERPINE1/SNAI2/FZD2/CITED2/INPP4B/PDGFRB/SLC7A1/DDAH1/COL5A2/MGLL/FYN/AMPH	21	CAF2 Up (679)	CAF2 Up (679)
HALLMARK_GLYCOLYSIS	HALLMARK_GLYCOLYSIS	23/217	194/4171	0.000140901	0.00169081	0.00144609	UGP2/SDC2/LDHA/B3GALT6/ENO1/STC2/PLOD1/TPI1/PPFIA4/PDK3/ENO2/PGAM1/COL5A1/PFKP/CITED2/SLC16A3/PGK1/P4HA1/ANGPTL4/GPC4/HK2/PGM2/STMN1	23	CAF2 Up (679)	CAF2 Up (679)
HALLMARK_TNFA_SIGNALING_VIA_NFKB	HALLMARK_TNFA_SIGNALING_VIA_NFKB	19/149	196/4171	5.37334e-05	0.00241801	0.00175341	SMAD3/NAMPT/SQSTM1/CEBPD/NINJ1/SOD2/ABCA1/TNFAIP8/IL6ST/PLK2/DUSP5/PHLDA1/NFKBIA/SAT1/SDC4/GFPT2/DRAM1/TRIB1/CXCL6	19	NAF Up (396)	NAF Up (396)
HALLMARK_MYOGENESIS	HALLMARK_MYOGENESIS	22/217	197/4171	0.00046753	0.00448829	0.00383867	HSPB2/CRYAB/DMPK/SCHIP1/SGCA/ITGA7/REEP1/COL4A2/STC2/CDH13/MYH11/MYH9/MEF2C/MYOZ1/GADD45B/PPFIA4/HBEGF/MEF2D/ITGB5/RIT1/CD36/HSPB8	22	CAF2 Up (679)	CAF2 Up (679)
HALLMARK_MITOTIC_SPINDLE	HALLMARK_MITOTIC_SPINDLE	21/217	194/4171	0.000954205	0.00763364	0.00652877	MYO1E/PCGF5/STK38L/RABGAP1/FGD4/BCAR1/PCNT/PDLIM5/SORBS2/NEDD9/MYH9/PKD2/TPX2/ACTN4/CYTH2/KIF4A/ARHGDIA/PLEKHG2/KIF2C/NUSAP1/KIF11	21	CAF2 Up (679)	CAF2 Up (679)
HALLMARK_CHOLESTEROL_HOMEOSTASIS	HALLMARK_CHOLESTEROL_HOMEOSTASIS	9/149	72/4171	0.000924255	0.0207957	0.0150799	LGALS3/TM7SF2/CD9/SCD/SEMA3B/PPARG/LSS/ANTXR2/FASN	9	NAF Up (396)	NAF Up (396)
HALLMARK_XENOBIOTIC_METABOLISM	HALLMARK_XENOBIOTIC_METABOLISM	16/149	196/4171	0.00147418	0.0221128	0.016035	HMOX1/FBLN1/MAN1A1/NINJ1/ELOVL5/ABCC3/GCLC/BLVRB/CYP27A1/ALDH2/TPST1/CROT/PGD/IDH1/PTGES/PROS1	16	NAF Up (396)	NAF Up (396)
HALLMARK_ANDROGEN_RESPONSE	HALLMARK_ANDROGEN_RESPONSE	10/149	96/4171	0.00201748	0.0226967	0.0164584	ALDH1A3/ELOVL5/TNFAIP8/SCD/ACSL3/SAT1/FADS1/NKX3-1/ABCC4/LIFR	10	NAF Up (396)	NAF Up (396)
HALLMARK_REACTIVE_OXYGEN_SPECIES_PATHWAY	HALLMARK_REACTIVE_OXYGEN_SPECIES_PATHWAY	6/149	44/4171	0.00431673	0.0388506	0.0281724	GPX4/SOD2/TXNRD1/GCLC/GCLM/G6PD	6	NAF Up (396)	NAF Up (396)
HALLMARK_REACTIVE_OXYGEN_SPECIES_PATHWAY	HALLMARK_REACTIVE_OXYGEN_SPECIES_PATHWAY	5/86	44/4171	0.0019126	0.0411525	0.0303229	PRNP/GCLM/GLRX/TXNRD1/GCLC	5	CAF1 Up (191)	CAF1 Up (191)
HALLMARK_XENOBIOTIC_METABOLISM	HALLMARK_XENOBIOTIC_METABOLISM	11/86	196/4171	0.00205762	0.0411525	0.0303229	TPST1/CYB5A/PTGDS/GABARAPL1/FBLN1/TMEM176B/ABCC3/CYP27A1/GCLC/VTN/NINJ1	11	CAF1 Up (191)	CAF1 Up (191)
HALLMARK_BILE_ACID_METABOLISM	HALLMARK_BILE_ACID_METABOLISM	10/149	112/4171	0.00621429	0.0411806	0.029862	ISOC1/ABCA1/GCLM/ALDH1A1/HSD17B11/CYP27A1/CROT/IDH1/FADS1/CH25H	10	NAF Up (396)	NAF Up (396)
HALLMARK_ESTROGEN_RESPONSE_EARLY	HALLMARK_ESTROGEN_RESPONSE_EARLY	14/149	189/4171	0.0069941	0.0411806	0.029862	DHRS3/NBL1/RHOBTB3/ELOVL5/OLFML3/SEMA3B/IL6ST/KRT13/ABLIM1/BLVRB/NAV2/LRIG1/PTGES/FASN	14	NAF Up (396)	NAF Up (396)
HALLMARK_MTORC1_SIGNALING	HALLMARK_MTORC1_SIGNALING	14/149	190/4171	0.007321	0.0411806	0.029862	NAMPT/CCNG1/SQSTM1/TM7SF2/ELOVL5/CD9/TXNRD1/SCD/GCLC/ME1/ACSL3/IDH1/FADS1/G6PD	14	NAF Up (396)	NAF Up (396)
HALLMARK_EPITHELIAL_MESENCHYMAL_TRANSITION	HALLMARK_EPITHELIAL_MESENCHYMAL_TRANSITION	14/149	195/4171	0.00914342	0.0457171	0.0331516	SFRP1/TGFBR3/FBLN1/SLIT2/CAPG/PCOLCE/MATN2/FBN2/COL6A3/GAS1/LAMA2/SAT1/SDC4/CXCL6	14	NAF Up (396)	NAF Up (396)
HALLMARK_ANGIOGENESIS	HALLMARK_ANGIOGENESIS	6/217	36/4171	0.00970096	0.0665209	0.0568928	PDGFA/JAG1/PTK2/SPP1/COL5A2/CCND2	6	CAF2 Up (679)	CAF2 Up (679)
HALLMARK_G2M_CHECKPOINT	HALLMARK_G2M_CHECKPOINT	17/217	181/4171	0.0120888	0.072533	0.0620348	HIF1A/DR1/TPX2/KIF4A/MCM2/TROAP/EGF/SLC7A1/UCK2/MCM5/GINS2/KIF2C/NUSAP1/CKS1B/KIF11/STMN1/MCM3	17	CAF2 Up (679)	CAF2 Up (679)
HALLMARK_EPITHELIAL_MESENCHYMAL_TRANSITION	HALLMARK_EPITHELIAL_MESENCHYMAL_TRANSITION	10/86	195/4171	0.0062878	0.0838373	0.0617749	TGM2/FBLN5/LAMA2/FGF2/FBLN1/IGFBP3/LUM/DCN/ITGA2/SGCD	10	CAF1 Up (191)	CAF1 Up (191)
HALLMARK_APOPTOSIS	HALLMARK_APOPTOSIS	11/149	158/4171	0.0246162	0.109843	0.0796522	LGALS3/GPX4/HMOX1/TGFBR3/SQSTM1/IGFBP6/SOD2/HGF/CDC25B/SAT1/PLAT	11	NAF Up (396)	NAF Up (396)
HALLMARK_PEROXISOME	HALLMARK_PEROXISOME	8/149	101/4171	0.0268505	0.109843	0.0796522	DHRS3/ISOC1/SOD2/ELOVL5/ALDH1A1/HSD17B11/IDH1/FADS1	8	NAF Up (396)	NAF Up (396)
HALLMARK_IL2_STAT5_SIGNALING	HALLMARK_IL2_STAT5_SIGNALING	12/149	189/4171	0.0363008	0.136128	0.0987126	PTGER2/DHRS3/GPX4/CAPG/SMPDL3A/HOPX/GALM/PHLDA1/ENPP1/LRIG1/NRP1/SOCS2	12	NAF Up (396)	NAF Up (396)
HALLMARK_KRAS_SIGNALING_UP	HALLMARK_KRAS_SIGNALING_UP	9/86	193/4171	0.0169595	0.139915	0.103095	CFH/IGFBP3/TMEM176A/TMEM176B/GLRX/APOD/PRDM1/ITGA2/ALDH1A3	9	CAF1 Up (191)	CAF1 Up (191)
HALLMARK_GLYCOLYSIS	HALLMARK_GLYCOLYSIS	9/86	194/4171	0.0174894	0.139915	0.103095	TPST1/AK3/CYB5A/B4GALT4/IGFBP3/GLRX/GLCE/DCN/GCLC	9	CAF1 Up (191)	CAF1 Up (191)
HALLMARK_COAGULATION	HALLMARK_COAGULATION	7/86	136/4171	0.021172	0.141147	0.104003	CFH/C1S/DPP4/C1R/CTSB/ITGA2/F3	7	CAF1 Up (191)	CAF1 Up (191)
HALLMARK_KRAS_SIGNALING_UP	HALLMARK_KRAS_SIGNALING_UP	12/149	193/4171	0.041633	0.144114	0.104504	ALDH1A3/SEMA3B/TMEM158/CROT/GFPT2/NRP1/MMD/PLAT/MALL/TRIB1/ANXA10/RELN	12	NAF Up (396)	NAF Up (396)
HALLMARK_BILE_ACID_METABOLISM	HALLMARK_BILE_ACID_METABOLISM	6/86	112/4171	0.0270457	0.154479	0.113826	ALDH1A1/ABCA1/GCLM/CYP27A1/HSD17B6/ISOC1	6	CAF1 Up (191)	CAF1 Up (191)
HALLMARK_ANGIOGENESIS	HALLMARK_ANGIOGENESIS	3/86	36/4171	0.0370535	0.154479	0.113826	APP/LUM/VTN	3	CAF1 Up (191)	CAF1 Up (191)
HALLMARK_HYPOXIA	HALLMARK_HYPOXIA	8/86	188/4171	0.0385757	0.154479	0.113826	TGM2/SCARB1/LXN/IGFBP3/GLRX/ADM/DCN/F3	8	CAF1 Up (191)	CAF1 Up (191)
HALLMARK_INTERFERON_ALPHA_RESPONSE	HALLMARK_INTERFERON_ALPHA_RESPONSE	5/86	91/4171	0.0386197	0.154479	0.113826	TMEM140/C1S/UBE2L6/PARP9/GBP2	5	CAF1 Up (191)	CAF1 Up (191)
HALLMARK_UV_RESPONSE_DN	HALLMARK_UV_RESPONSE_DN	9/149	134/4171	0.0488493	0.157015	0.113859	SMAD3/TGFBR3/LPAR1/PPARG/TGFBR2/IRS1/MET/NRP1/KCNMA1	9	NAF Up (396)	NAF Up (396)
HALLMARK_INTERFERON_GAMMA_RESPONSE	HALLMARK_INTERFERON_GAMMA_RESPONSE	8/86	195/4171	0.0462841	0.158209	0.116575	CFH/ICAM1/C1S/C1R/UBE2L6/XAF1/ISOC1/ST3GAL5	8	CAF1 Up (191)	CAF1 Up (191)
HALLMARK_TNFA_SIGNALING_VIA_NFKB	HALLMARK_TNFA_SIGNALING_VIA_NFKB	8/86	196/4171	0.0474628	0.158209	0.116575	DRAM1/ICAM1/ABCA1/IL6ST/NFE2L2/CEBPD/F3/NINJ1	8	CAF1 Up (191)	CAF1 Up (191)
HALLMARK_HEDGEHOG_SIGNALING	HALLMARK_HEDGEHOG_SIGNALING	5/217	35/4171	0.0330143	0.176076	0.150592	CDK5R1/HEY2/MYH9/RTN1/SCG2	5	CAF2 Up (679)	CAF2 Up (679)
HALLMARK_ADIPOGENESIS	HALLMARK_ADIPOGENESIS	11/149	186/4171	0.0670221	0.200286	0.145237	CMBL/TKT/GPX4/ABCA1/LAMA4/PPARG/ME1/STOM/ALDH2/IDH1/LIFR	11	NAF Up (396)	NAF Up (396)
HALLMARK_HEME_METABOLISM	HALLMARK_HEME_METABOLISM	11/149	188/4171	0.071213	0.200286	0.145237	TSPAN5/SELENBP1/GCLC/GCLM/SNCA/BLVRB/MOCOS/ALDH6A1/MOSPD1/BLVRA/CTSB	11	NAF Up (396)	NAF Up (396)
HALLMARK_ESTROGEN_RESPONSE_LATE	HALLMARK_ESTROGEN_RESPONSE_LATE	11/149	195/4171	0.0871924	0.230339	0.16703	PERP/MDK/NBL1/ELOVL5/CD9/SEMA3B/IL6ST/KRT13/BLVRB/PTGES/ASS1	11	NAF Up (396)	NAF Up (396)
HALLMARK_INFLAMMATORY_RESPONSE	HALLMARK_INFLAMMATORY_RESPONSE	11/149	197/4171	0.0921357	0.230339	0.16703	PTGER2/NAMPT/LPAR1/LY6E/ABCA1/KCNJ2/NFKBIA/MET/HRH1/CXCL6/BDKRB1	11	NAF Up (396)	NAF Up (396)
HALLMARK_HEME_METABOLISM	HALLMARK_HEME_METABOLISM	7/86	188/4171	0.0912062	0.266258	0.19619	PICALM/MOSPD1/GCLM/CTSB/CTNS/HEBP1/GCLC	7	CAF1 Up (191)	CAF1 Up (191)
HALLMARK_ESTROGEN_RESPONSE_EARLY	HALLMARK_ESTROGEN_RESPONSE_EARLY	7/86	189/4171	0.0931903	0.266258	0.19619	DHRS3/SYNGR1/TGM2/SCARB1/RHOBTB3/IL6ST/CLIC3	7	CAF1 Up (191)	CAF1 Up (191)
HALLMARK_MYOGENESIS	HALLMARK_MYOGENESIS	7/86	197/4171	0.109936	0.293162	0.216014	PRNP/LAMA2/APP/FGF2/IGFBP3/APOD/SGCD	7	CAF1 Up (191)	CAF1 Up (191)
HALLMARK_HEDGEHOG_SIGNALING	HALLMARK_HEDGEHOG_SIGNALING	3/149	35/4171	0.127744	0.302551	0.219393	TLE1/NRP1/AMOT	3	NAF Up (396)	NAF Up (396)
HALLMARK_P53_PATHWAY	HALLMARK_P53_PATHWAY	10/149	190/4171	0.139746	0.314429	0.228007	PERP/HMOX1/CCNG1/NINJ1/PITPNC1/PLK2/STOM/SAT1/DRAM1/FGF13	10	NAF Up (396)	NAF Up (396)
HALLMARK_MTORC1_SIGNALING	HALLMARK_MTORC1_SIGNALING	15/217	190/4171	0.0675257	0.324124	0.277211	ACTR2/LDHA/PSME3/ENO1/SLC1A4/TPI1/GBE1/LGMN/MCM2/PGK1/P4HA1/RIT1/SLC2A1/HK2/ACTR3	15	CAF2 Up (679)	CAF2 Up (679)
HALLMARK_INTERFERON_GAMMA_RESPONSE	HALLMARK_INTERFERON_GAMMA_RESPONSE	10/149	195/4171	0.15729	0.336693	0.244151	NAMPT/C1S/C1R/LY6E/ISOC1/SOD2/VAMP5/UBE2L6/NFKBIA/IL7	10	NAF Up (396)	NAF Up (396)
HALLMARK_MYOGENESIS	HALLMARK_MYOGENESIS	10/149	197/4171	0.164605	0.336693	0.244151	BIN1/PKIA/LPIN1/SCD/COL6A3/ABLIM1/LAMA2/NAV2/BDKRB2/FST	10	NAF Up (396)	NAF Up (396)
HALLMARK_FATTY_ACID_METABOLISM	HALLMARK_FATTY_ACID_METABOLISM	8/149	153/4171	0.179194	0.350598	0.254235	ELOVL5/UBE2L6/ME1/ALDH1A1/HSD17B11/BLVRA/IDH1/FASN	8	NAF Up (396)	NAF Up (396)
HALLMARK_PEROXISOME	HALLMARK_PEROXISOME	4/86	101/4171	0.154065	0.385163	0.283805	ALDH1A1/DHRS3/ISOC1/SEMA3C	4	CAF1 Up (191)	CAF1 Up (191)
HALLMARK_INTERFERON_ALPHA_RESPONSE	HALLMARK_INTERFERON_ALPHA_RESPONSE	5/149	91/4171	0.224392	0.420735	0.305095	C1S/LY6E/UBE2L6/GBP2/IL7	5	NAF Up (396)	NAF Up (396)
HALLMARK_COMPLEMENT	HALLMARK_COMPLEMENT	6/86	194/4171	0.209337	0.461624	0.340144	CFH/C1S/DPP4/C1R/CTSB/F3	6	CAF1 Up (191)	CAF1 Up (191)
HALLMARK_ESTROGEN_RESPONSE_LATE	HALLMARK_ESTROGEN_RESPONSE_LATE	6/86	195/4171	0.21263	0.461624	0.340144	SCARB1/ASS1/PERP/IL6ST/IMPA2/CLIC3	6	CAF1 Up (191)	CAF1 Up (191)
HALLMARK_INFLAMMATORY_RESPONSE	HALLMARK_INFLAMMATORY_RESPONSE	6/86	197/4171	0.219271	0.461624	0.340144	ICAM1/SLC31A1/ABCA1/ADM/PDPN/F3	6	CAF1 Up (191)	CAF1 Up (191)
HALLMARK_ESTROGEN_RESPONSE_EARLY	HALLMARK_ESTROGEN_RESPONSE_EARLY	14/217	189/4171	0.112652	0.473528	0.404991	SLC24A3/DLC1/SLC1A4/REEP1/STC2/PODXL/RARA/TIPARP/DYNLT3/MYOF/RASGRP1/SLC2A1/ENDOD1/HSPB8	14	CAF2 Up (679)	CAF2 Up (679)
HALLMARK_APOPTOSIS	HALLMARK_APOPTOSIS	12/217	158/4171	0.118382	0.473528	0.404991	DNM1L/PTK2/SMAD7/NEDD9/GADD45B/RARA/ENO2/PEA15/PDGFRB/CASP2/RHOB/CCND2	12	CAF2 Up (679)	CAF2 Up (679)
HALLMARK_TNFA_SIGNALING_VIA_NFKB	HALLMARK_TNFA_SIGNALING_VIA_NFKB	14/217	196/4171	0.13918	0.513895	0.439515	JAG1/KLF2/EDN1/PMEPA1/PDLIM5/GEM/SERPINE1/SERPINB2/GADD45B/TRIP10/TIPARP/HBEGF/RHOB/SLC2A6	14	CAF2 Up (679)	CAF2 Up (679)
HALLMARK_IL6_JAK_STAT3_SIGNALING	HALLMARK_IL6_JAK_STAT3_SIGNALING	3/86	87/4171	0.266475	0.53295	0.3927	IL6ST/ACVRL1/LTBR	3	CAF1 Up (191)	CAF1 Up (191)
HALLMARK_UV_RESPONSE_DN	HALLMARK_UV_RESPONSE_DN	4/86	134/4171	0.298287	0.568166	0.418648	FBLN5/TGFBR2/RND3/F3	4	CAF1 Up (191)	CAF1 Up (191)
HALLMARK_COAGULATION	HALLMARK_COAGULATION	10/217	136/4171	0.168415	0.577424	0.49385	THBS1/MMP11/FN1/CRIP2/FBN1/SERPINE1/LGMN/SERPINB2/FYN/HTRA1	10	CAF2 Up (679)	CAF2 Up (679)
HALLMARK_IL2_STAT5_SIGNALING	HALLMARK_IL2_STAT5_SIGNALING	5/86	189/4171	0.350207	0.604482	0.445408	DHRS3/PRNP/TGM2/GABARAPL1/SLC39A8	5	CAF1 Up (191)	CAF1 Up (191)
HALLMARK_P53_PATHWAY	HALLMARK_P53_PATHWAY	5/86	190/4171	0.354365	0.604482	0.445408	DRAM1/PERP/APP/ZNF365/NINJ1	5	CAF1 Up (191)	CAF1 Up (191)
HALLMARK_APICAL_JUNCTION	HALLMARK_APICAL_JUNCTION	5/86	192/4171	0.362689	0.604482	0.445408	ICAM1/ADAMTS5/LAYN/MPZL1/ITGA2	5	CAF1 Up (191)	CAF1 Up (191)
HALLMARK_COAGULATION	HALLMARK_COAGULATION	6/149	136/4171	0.358174	0.605595	0.439145	C1S/C1R/CD9/CTSB/PLAT/PROS1	6	NAF Up (396)	NAF Up (396)
HALLMARK_ANGIOGENESIS	HALLMARK_ANGIOGENESIS	2/149	36/4171	0.370443	0.605595	0.439145	NRP1/CXCL6	2	NAF Up (396)	NAF Up (396)
HALLMARK_IL6_JAK_STAT3_SIGNALING	HALLMARK_IL6_JAK_STAT3_SIGNALING	4/149	87/4171	0.37751	0.605595	0.439145	HMOX1/CD9/IL6ST/IL7	4	NAF Up (396)	NAF Up (396)
HALLMARK_COMPLEMENT	HALLMARK_COMPLEMENT	8/149	194/4171	0.390272	0.605595	0.439145	GNG2/LGALS3/C1S/C1R/ME1/DUSP5/CTSB/PLAT	8	NAF Up (396)	NAF Up (396)
HALLMARK_GLYCOLYSIS	HALLMARK_GLYCOLYSIS	8/149	194/4171	0.390272	0.605595	0.439145	GNPDA1/GCLC/ME1/FUT8/MET/TPST1/IDH1/G6PD	8	NAF Up (396)	NAF Up (396)
HALLMARK_UV_RESPONSE_UP	HALLMARK_UV_RESPONSE_UP	4/86	152/4171	0.383527	0.613643	0.452158	TYRO3/ICAM1/HSPA2/IL6ST	4	CAF1 Up (191)	CAF1 Up (191)
HALLMARK_COMPLEMENT	HALLMARK_COMPLEMENT	13/217	194/4171	0.207742	0.664774	0.568557	CDK5R1/DYRK2/CALM1/CD59/FN1/COL4A2/CDH13/SERPINE1/LGMN/SERPINB2/RASGRP1/FYN/CD36	13	CAF2 Up (679)	CAF2 Up (679)
HALLMARK_APICAL_SURFACE	HALLMARK_APICAL_SURFACE	2/149	43/4171	0.458273	0.68741	0.498473	GAS1/NTNG1	2	NAF Up (396)	NAF Up (396)
HALLMARK_NOTCH_SIGNALING	HALLMARK_NOTCH_SIGNALING	3/217	32/4171	0.230667	0.692001	0.591843	HEYL/JAG1/NOTCH3	3	CAF2 Up (679)	CAF2 Up (679)
HALLMARK_IL2_STAT5_SIGNALING	HALLMARK_IL2_STAT5_SIGNALING	12/217	189/4171	0.277559	0.740601	0.633409	SLC29A2/MYO1E/PRKCH/RGS16/GADD45B/SPP1/UCK2/P4HA1/RHOB/CCND2/PLAGL1/HK2	12	CAF2 Up (679)	CAF2 Up (679)
HALLMARK_PI3K_AKT_MTOR_SIGNALING	HALLMARK_PI3K_AKT_MTOR_SIGNALING	7/217	103/4171	0.2878	0.740601	0.633409	NGF/ACTR2/UBE2N/ARHGDIA/RIT1/SLC2A1/ACTR3	7	CAF2 Up (679)	CAF2 Up (679)
HALLMARK_KRAS_SIGNALING_UP	HALLMARK_KRAS_SIGNALING_UP	12/217	193/4171	0.302058	0.740601	0.633409	NGF/TRIB2/MMP11/RGS16/CPE/ETS1/HBEGF/MAP3K1/SPP1/ANGPTL4/CCND2/ITGBL1	12	CAF2 Up (679)	CAF2 Up (679)
HALLMARK_TGF_BETA_SIGNALING	HALLMARK_TGF_BETA_SIGNALING	4/217	54/4171	0.308584	0.740601	0.633409	THBS1/PMEPA1/SMAD7/SERPINE1	4	CAF2 Up (679)	CAF2 Up (679)
HALLMARK_NOTCH_SIGNALING	HALLMARK_NOTCH_SIGNALING	1/86	32/4171	0.487886	0.750593	0.553069	WNT2	1	CAF1 Up (191)	CAF1 Up (191)
HALLMARK_E2F_TARGETS	HALLMARK_E2F_TARGETS	11/217	183/4171	0.354052	0.809262	0.692132	DIAPH3/SPC25/DCK/KIF4A/MCM2/MCM5/KIF2C/ASF1B/CKS1B/STMN1/MCM3	11	CAF2 Up (679)	CAF2 Up (679)
HALLMARK_WNT_BETA_CATENIN_SIGNALING	HALLMARK_WNT_BETA_CATENIN_SIGNALING	3/217	42/4171	0.374756	0.817649	0.699305	JAG1/HEY2/CCND2	3	CAF2 Up (679)	CAF2 Up (679)
HALLMARK_PANCREAS_BETA_CELLS	HALLMARK_PANCREAS_BETA_CELLS	1/86	40/4171	0.567133	0.819668	0.603966	DPP4	1	CAF1 Up (191)	CAF1 Up (191)
HALLMARK_APICAL_SURFACE	HALLMARK_APICAL_SURFACE	1/86	43/4171	0.593615	0.819668	0.603966	APP	1	CAF1 Up (191)	CAF1 Up (191)
HALLMARK_ANDROGEN_RESPONSE	HALLMARK_ANDROGEN_RESPONSE	2/86	96/4171	0.59426	0.819668	0.603966	ALDH1A3/ABCC4	2	CAF1 Up (191)	CAF1 Up (191)
HALLMARK_FATTY_ACID_METABOLISM	HALLMARK_FATTY_ACID_METABOLISM	3/86	153/4171	0.617649	0.823532	0.606813	ALDH1A1/GABARAPL1/UBE2L6	3	CAF1 Up (191)	CAF1 Up (191)
HALLMARK_APOPTOSIS	HALLMARK_APOPTOSIS	3/86	158/4171	0.639616	0.825311	0.608124	APP/LUM/DCN	3	CAF1 Up (191)	CAF1 Up (191)
HALLMARK_TGF_BETA_SIGNALING	HALLMARK_TGF_BETA_SIGNALING	2/149	54/4171	0.580844	0.843161	0.611415	SMAD3/SMAD6	2	NAF Up (396)	NAF Up (396)
HALLMARK_APICAL_JUNCTION	HALLMARK_APICAL_JUNCTION	11/217	192/4171	0.415299	0.866711	0.741266	NRXN2/YWHAH/PTK2/SLC30A3/FBN1/MYH9/MSN/ACTN4/ITGA3/ITGA10/ARHGEF6	11	CAF2 Up (679)	CAF2 Up (679)
HALLMARK_UV_RESPONSE_UP	HALLMARK_UV_RESPONSE_UP	5/149	152/4171	0.639771	0.899678	0.652398	HMOX1/SQSTM1/SOD2/IL6ST/NFKBIA	5	NAF Up (396)	NAF Up (396)
HALLMARK_ADIPOGENESIS	HALLMARK_ADIPOGENESIS	3/86	186/4171	0.746348	0.917383	0.675966	LAMA4/SCARB1/ABCA1	3	CAF1 Up (191)	CAF1 Up (191)
HALLMARK_MTORC1_SIGNALING	HALLMARK_MTORC1_SIGNALING	3/86	190/4171	0.759371	0.917383	0.675966	GLRX/TXNRD1/GCLC	3	CAF1 Up (191)	CAF1 Up (191)
HALLMARK_CHOLESTEROL_HOMEOSTASIS	HALLMARK_CHOLESTEROL_HOMEOSTASIS	1/86	72/4171	0.779775	0.917383	0.675966	ANTXR2	1	CAF1 Up (191)	CAF1 Up (191)
HALLMARK_P53_PATHWAY	HALLMARK_P53_PATHWAY	10/217	190/4171	0.533121	0.983026	0.840746	PDGFA/CDK5R1/CYFIP2/RGS16/CDH13/HBEGF/ABHD4/ADA/EPHA2/CCND2	10	CAF2 Up (679)	CAF2 Up (679)
HALLMARK_UV_RESPONSE_UP	HALLMARK_UV_RESPONSE_UP	8/217	152/4171	0.539858	0.983026	0.840746	POLE3/SLC25A4/KLHDC3/ENO2/FEN1/RASGRP1/RHOB/RFC4	8	CAF2 Up (679)	CAF2 Up (679)
HALLMARK_XENOBIOTIC_METABOLISM	HALLMARK_XENOBIOTIC_METABOLISM	10/217	196/4171	0.573883	0.983026	0.840746	CYFIP2/BCAR1/PDLIM5/AP4B1/SERPINE1/UGDH/EPHA2/SPINT2/CD36/SERTAD1	10	CAF2 Up (679)	CAF2 Up (679)
HALLMARK_MYC_TARGETS_V2	HALLMARK_MYC_TARGETS_V2	3/217	57/4171	0.576348	0.983026	0.840746	SLC29A2/MCM5/HK2	3	CAF2 Up (679)	CAF2 Up (679)
HALLMARK_ADIPOGENESIS	HALLMARK_ADIPOGENESIS	9/217	186/4171	0.639579	0.983026	0.840746	ITGA7/GBE1/CHCHD10/RNF11/COL4A1/ANGPTL4/MGLL/CD36/HSPB8	9	CAF2 Up (679)	CAF2 Up (679)
HALLMARK_APICAL_SURFACE	HALLMARK_APICAL_SURFACE	2/217	43/4171	0.663768	0.983026	0.840746	AFAP1L2/ATP8B1	2	CAF2 Up (679)	CAF2 Up (679)
HALLMARK_REACTIVE_OXYGEN_SPECIES_PATHWAY	HALLMARK_REACTIVE_OXYGEN_SPECIES_PATHWAY	2/217	44/4171	0.676164	0.983026	0.840746	OXSR1/PFKP	2	CAF2 Up (679)	CAF2 Up (679)
HALLMARK_FATTY_ACID_METABOLISM	HALLMARK_FATTY_ACID_METABOLISM	7/217	153/4171	0.692681	0.983026	0.840746	YWHAH/LDHA/FH/ENO2/UGDH/MGLL/CD36	7	CAF2 Up (679)	CAF2 Up (679)
HALLMARK_ESTROGEN_RESPONSE_LATE	HALLMARK_ESTROGEN_RESPONSE_LATE	9/217	195/4171	0.695159	0.983026	0.840746	SLC24A3/SLC29A1/CPE/SLC1A4/UGDH/DYNLT3/MYOF/GINS2/HSPB8	9	CAF2 Up (679)	CAF2 Up (679)
HALLMARK_INFLAMMATORY_RESPONSE	HALLMARK_INFLAMMATORY_RESPONSE	9/217	197/4171	0.706762	0.983026	0.840746	RNF144B/EDN1/AXL/RGS16/HIF1A/SERPINE1/HBEGF/SLC7A1/RASGRP1	9	CAF2 Up (679)	CAF2 Up (679)
HALLMARK_CHOLESTEROL_HOMEOSTASIS	HALLMARK_CHOLESTEROL_HOMEOSTASIS	3/217	72/4171	0.732439	0.983026	0.840746	JAG1/LGMN/PDK3	3	CAF2 Up (679)	CAF2 Up (679)
HALLMARK_KRAS_SIGNALING_DN	HALLMARK_KRAS_SIGNALING_DN	8/217	188/4171	0.772634	0.983026	0.840746	EFHD1/NTF3/KCNMB1/EDN1/SLC30A3/SERPINB2/TGM1/EGF	8	CAF2 Up (679)	CAF2 Up (679)
HALLMARK_PEROXISOME	HALLMARK_PEROXISOME	4/217	101/4171	0.779937	0.983026	0.840746	YWHAH/SLC25A4/ATXN1/ABCB9	4	CAF2 Up (679)	CAF2 Up (679)
HALLMARK_UNFOLDED_PROTEIN_RESPONSE	HALLMARK_UNFOLDED_PROTEIN_RESPONSE	4/217	106/4171	0.811068	0.983026	0.840746	PDIA5/SLC1A4/STC2/CKS1B	4	CAF2 Up (679)	CAF2 Up (679)
HALLMARK_PROTEIN_SECRETION	HALLMARK_PROTEIN_SECRETION	3/217	95/4171	0.880044	0.983026	0.840746	DNM1L/BNIP3/CAV2	3	CAF2 Up (679)	CAF2 Up (679)
HALLMARK_ANDROGEN_RESPONSE	HALLMARK_ANDROGEN_RESPONSE	3/217	96/4171	0.884403	0.983026	0.840746	PMEPA1/PDLIM5/INPP4B	3	CAF2 Up (679)	CAF2 Up (679)
HALLMARK_SPERMATOGENESIS	HALLMARK_SPERMATOGENESIS	4/217	128/4171	0.908181	0.983026	0.840746	RPL39L/RFC4/TLE4/KIF2C	4	CAF2 Up (679)	CAF2 Up (679)
HALLMARK_OXIDATIVE_PHOSPHORYLATION	HALLMARK_OXIDATIVE_PHOSPHORYLATION	6/217	179/4171	0.912769	0.983026	0.840746	LDHA/FH/SLC25A4/TIMM8B/TIMM10/ATP1B1	6	CAF2 Up (679)	CAF2 Up (679)
HALLMARK_MYC_TARGETS_V1	HALLMARK_MYC_TARGETS_V1	6/217	186/4171	0.929582	0.983026	0.840746	LDHA/POLE3/MCM2/PGK1/MCM5/RFC4	6	CAF2 Up (679)	CAF2 Up (679)
HALLMARK_IL6_JAK_STAT3_SIGNALING	HALLMARK_IL6_JAK_STAT3_SIGNALING	2/217	87/4171	0.946415	0.983026	0.840746	STAT1/CD36	2	CAF2 Up (679)	CAF2 Up (679)
HALLMARK_ALLOGRAFT_REJECTION	HALLMARK_ALLOGRAFT_REJECTION	6/217	195/4171	0.946985	0.983026	0.840746	STAT4/UBE2N/HIF1A/ETS1/STAT1/CCND2	6	CAF2 Up (679)	CAF2 Up (679)
HALLMARK_HEME_METABOLISM	HALLMARK_HEME_METABOLISM	5/217	188/4171	0.972152	0.983026	0.840746	NEK7/GLRX5/SLC2A1/TNS1/ENDOD1	5	CAF2 Up (679)	CAF2 Up (679)
HALLMARK_DNA_REPAIR	HALLMARK_DNA_REPAIR	3/217	138/4171	0.978299	0.983026	0.840746	ADA/FEN1/RFC4	3	CAF2 Up (679)	CAF2 Up (679)
HALLMARK_INTERFERON_GAMMA_RESPONSE	HALLMARK_INTERFERON_GAMMA_RESPONSE	5/217	195/4171	0.978407	0.983026	0.840746	STAT4/HIF1A/PELI1/STAT1/PFKP	5	CAF2 Up (679)	CAF2 Up (679)
HALLMARK_BILE_ACID_METABOLISM	HALLMARK_BILE_ACID_METABOLISM	2/217	112/4171	0.983026	0.983026	0.840746	SLC29A1/ATXN1	2	CAF2 Up (679)	CAF2 Up (679)
HALLMARK_PROTEIN_SECRETION	HALLMARK_PROTEIN_SECRETION	1/86	95/4171	0.864952	0.984067	0.725102	ABCA1	1	CAF1 Up (191)	CAF1 Up (191)
HALLMARK_ALLOGRAFT_REJECTION	HALLMARK_ALLOGRAFT_REJECTION	2/86	195/4171	0.917226	0.984067	0.725102	ICAM1/GBP2	2	CAF1 Up (191)	CAF1 Up (191)
HALLMARK_SPERMATOGENESIS	HALLMARK_SPERMATOGENESIS	1/86	128/4171	0.933374	0.984067	0.725102	HSPA2	1	CAF1 Up (191)	CAF1 Up (191)
HALLMARK_DNA_REPAIR	HALLMARK_DNA_REPAIR	1/86	138/4171	0.946276	0.984067	0.725102	AK3	1	CAF1 Up (191)	CAF1 Up (191)
HALLMARK_OXIDATIVE_PHOSPHORYLATION	HALLMARK_OXIDATIVE_PHOSPHORYLATION	1/86	179/4171	0.977898	0.984067	0.725102	CYB5A	1	CAF1 Up (191)	CAF1 Up (191)
HALLMARK_MITOTIC_SPINDLE	HALLMARK_MITOTIC_SPINDLE	1/86	194/4171	0.984067	0.984067	0.725102	ARHGEF3	1	CAF1 Up (191)	CAF1 Up (191)
HALLMARK_PANCREAS_BETA_CELLS	HALLMARK_PANCREAS_BETA_CELLS	1/149	40/4171	0.768236	0.992426	0.719654	ISL1	1	NAF Up (396)	NAF Up (396)
HALLMARK_G2M_CHECKPOINT	HALLMARK_G2M_CHECKPOINT	5/149	181/4171	0.783692	0.992426	0.719654	SMAD3/CDC25B/MEIS1/MEIS2/CDKN3	5	NAF Up (396)	NAF Up (396)
HALLMARK_DNA_REPAIR	HALLMARK_DNA_REPAIR	3/149	138/4171	0.878167	0.992426	0.719654	GPX4/TAF10/REV3L	3	NAF Up (396)	NAF Up (396)
HALLMARK_OXIDATIVE_PHOSPHORYLATION	HALLMARK_OXIDATIVE_PHOSPHORYLATION	4/149	179/4171	0.890395	0.992426	0.719654	GPX4/ACAT1/ALDH6A1/IDH1	4	NAF Up (396)	NAF Up (396)
HALLMARK_HYPOXIA	HALLMARK_HYPOXIA	4/149	188/4171	0.911313	0.992426	0.719654	LXN/HMOX1/SELENBP1/SDC4	4	NAF Up (396)	NAF Up (396)
HALLMARK_APICAL_JUNCTION	HALLMARK_APICAL_JUNCTION	4/149	192/4171	0.919424	0.992426	0.719654	MDK/SLIT2/CLDN11/IRS1	4	NAF Up (396)	NAF Up (396)
HALLMARK_SPERMATOGENESIS	HALLMARK_SPERMATOGENESIS	2/149	128/4171	0.94795	0.992426	0.719654	LPIN1/CDKN3	2	NAF Up (396)	NAF Up (396)
HALLMARK_PROTEIN_SECRETION	HALLMARK_PROTEIN_SECRETION	1/149	95/4171	0.969683	0.992426	0.719654	ABCA1	1	NAF Up (396)	NAF Up (396)
HALLMARK_MITOTIC_SPINDLE	HALLMARK_MITOTIC_SPINDLE	3/149	194/4171	0.973377	0.992426	0.719654	BIN1/MID1/CDC42EP4	3	NAF Up (396)	NAF Up (396)
HALLMARK_ALLOGRAFT_REJECTION	HALLMARK_ALLOGRAFT_REJECTION	3/149	195/4171	0.974132	0.992426	0.719654	CAPG/GBP2/IL7	3	NAF Up (396)	NAF Up (396)
HALLMARK_PI3K_AKT_MTOR_SIGNALING	HALLMARK_PI3K_AKT_MTOR_SIGNALING	1/149	103/4171	0.9775	0.992426	0.719654	SQSTM1	1	NAF Up (396)	NAF Up (396)
HALLMARK_E2F_TARGETS	HALLMARK_E2F_TARGETS	2/149	183/4171	0.991062	0.992426	0.719654	CDC25B/CDKN3	2	NAF Up (396)	NAF Up (396)
HALLMARK_KRAS_SIGNALING_DN	HALLMARK_KRAS_SIGNALING_DN	2/149	188/4171	0.992426	0.992426	0.719654	MFSD6/KRT13	2	NAF Up (396)	NAF Up (396)

## Sheet: Table S6
signature	Buechler_PanFibroblast_lung_NPNT_alveolar	Buechler_PanFibroblast_lung_PI16_adventitial	Buechler_PanFibroblast_PDAC_LRRC15	Chen_PRAD_CAF_0	Chen_PRAD_CAF_1	Chen_PRAD_CAF_2	Chen_PRAD_CAF_3	Chen_PRAD_CAF_4	Elyada_PDAC_iCAF	Elyada_PDAC_myCAF	Hanley_NSCLC_adventitial	Hanley_NSCLC_alveolar	Hanley_NSCLC_myofibroblast	Henry_Prostate_fibroblast	Henry_Prostate_smooth muscle	Joseph_Prostate_interstitial	Joseph_Prostate_pericytes	Joseph_Prostate_periepithelial	Joseph_Prostate_pSMC	Joseph_Prostate_vSMC	Kieffer_BRCA_CAF1	Kieffer_BRCA_detox_iCAF	Kieffer_BRCA_ECM_myCAF	Kieffer_BRCA_IFNg_iCAF	Kieffer_BRCA_IL_iCAF	Kieffer_BRCA_normal	Kieffer_BRCA_TGFb_myCAF	Kieffer_BRCA_wound_myCAF	Kim_LUAD_COL13A1_matrix_fibroblasts	Kim_LUAD_COL14A1_matrix_fibroblasts	Kim_LUAD_lipofibroblasts	Kim_LUAD_mesothelial	Kim_LUAD_myofibroblasts	Kim_LUAD_pericytes	Kim_LUAD_SMCs	Kim_Metastasis_signature	Lambrechts_NSCLC_C1	Lambrechts_NSCLC_C2	Lambrechts_NSCLC_C4	Lambrechts_NSCLC_C5	Lambrechts_NSCLC_C6	Lambrechts_NSCLC_C7	Muhl_PanTissue_fibroblast	Muhl_PanTissue_mural	Nicolas_CRC_pericyte_C0	Nicolas_CRC_CAF_C1	Nicolas_CRC_CAF_C2	Nicolas_CRC_iCAF_IL1_TNFa_C3	Nicolas_CRC_low_C4
PMID	33981032	33981032	33981032	33420488	33420488	33420488	33420488	33420488	31197017	31197017	36720863	36720863	36720863	30566875	30566875	34173975	34173975	34173975	34173975	34173975	32434947	32434947	32434947	32434947	32434947	32434947	32434947	32434947	32385277	32385277	32385277	32385277	32385277	32385277	32385277	21047417	29988129	29988129	29988129	29988129	29988129	29988129	32769974	32769974	35120600	35120600	35120600	35120600	35120600
Genes	A2M	PLA2G2A	CTHRC1	PDGFRB	JUNB	SFRP2	MARCKSL1	ACTA2	C3	MYL9	IGFBP6	MACF1	MMP11	APOD	TAGLN	CCK	RGS5	APOD	DES	PDK4	LAMA2	ADH1B	ASPN	CCL19	ITM2A	ACACB	CST1	SFRP4	COL13A1	COL14A1	FABP4	UPK3B	ACTA2	RGS5	CNN1	ADAM12	CTHRC1	COX4I2	PLA2G2A	MMP3	GPC3	ALDH1A3	NAV1	DES	RGS5	ISLR	IGLC7	COL7A1	CXCL14
↓	LIMCH1	C3	SDC1	CALD1	ZFP36	PTGDS	DCLK3	MAP3K7CL	DUSP1	CALD1	PI16	RGCC	POSTN	FBLN1	MYL9	TNFAIP6	NDUFA4L2	PTGDS	ACTG2	RHOB	SFRP4	C7	COL3A1	VCAM1	CXCL12	ACSM5	LAMP5	CCDC80	TCF21	GSN	FABP5	MSLN	MYH11	CSPG4	SYNPO2	AEBP1	VCAN	HIGD1B	SFRP2	SERPINE2	MFAP4	C3	DPT	PPP1R12B	NDUFA4L2	GREM1	SPINK4	CXCL8	F3
	CES1	MGST1	COL11A1	SEPT7	FOSB	CFD	ADAMTS12	RERGL	FBLN1	MMP11	MFAP5	INMT	CCL19	PTGDS	TPM2	HSPA5	GJA4	SERPINE2	TAGLN	ADIRF	PDGFRA	CXCL12	THY1	RBP5	FIGF	ADAMTS5	LOXL1	OGN	ITGAB	PI16	PPARG	CALB2	TAGLN	ABCC9	CRYAB	ASPN	SULF1	RGS5			A2M	CCL2	HSD11B1	LMOD1	COL18A1	SPON2	TFF3	MMP1	AGT
	ADH1B	EFEMP1	BGN	RGS5	JUN	FBLN2	LINC00152	C12orf75	LMNA	HOPX	APOD	LIMCH1	CTHRC1	CFD	ACTA2	SERPINF1	SRGN	CXCL8	MYL9	APOLD1	LRRC15	TNXB	SFRP2	CYP1B1	FXYD1	ADRB1	EDNRA	DCN	CXCL14	CYGB		WT1	ACTG2	KCNJ8	DES	BGN	COL10A1	GJA4			CYR61	SOD2	CD34	MGST3	COL4A1	CTSK	REG4	FTH1	TGM2
	SCN7A	MEDAG	COL10A1	HIGD1B	FOS	APOD	OLFML2A	CNN1	CLU	BGN	PLA2G2A	A2M	COL1A1	DCN	RGS5	FBLN1	CTSC	TFPI2	TPM2	RGS5	GREM1	RSPO3	COL10A1	C7	PLPP3	AGTR1	TGFB1	PTGER3	NPNT	PRRX1			MYLK			C7ORF10	POSTN	NDUFA4L2			MACF1	TNFRSF12A	CELF2	RGS4	COL4A2	MFAP4	TFF1	ADM	EMID1
	MFAP4	CCDC80	HTRA1	NOTCH3	SOCS3	FBLN1	PTPRE	PLN	CCDC80	IGFBP7	GSN	GPC3	ACTA2	PTGS2	MT1A	SERPINA3	PI15	PTGS2	TPM1	MUSTN1	SFRP2	DCN	COL6A3	TNFRSF4	TNFRSF10D	AKR1C4	TGFB3	SFRP2								CDH11	SFRP4	PDGFRB			GPX3	SLC20A1	ENTPD2	PCP4L1	TPPP3	HTRA3	GJB2	SLC16A3	NSG1
	TCF21	UAP1	GJB2	SPARC	EGR1	SFRP4	CD248	NOV	MYC	TPM2	CFD	PLEKHH2	COL3A1	SERPINE2	MYH11	CLU	CYTOR	G0S2	ACTA2	MT1A	KIAA1462	C16orf89	LRRC17	CXCL13	CTB-92J24.3	ANKRD20A4	TNN	PDGFRL								COL10A1	HTRA3	COL4A1			TIMP3	NFKBIA	COL5A1	STOM	PLXDC1	SULF1	SDC1	CXCL5	PLAT
	TGM2	CHRDL1	HSPA1B	NDUFA4L2	ATF3	VCAN	OLFML2B	SBSPON	EFEMP1	CTHRC1	SLPI	TCF21	INHBA	LUM	GJA4	GSN	BGN	CSF3	MYH11	ZFHX3	DCN	GDF10	CILP	CXCL9	LAMC3	ANKRD31	CST2	SMOC2								COL11A1	ASPN	PTP4A3			CFD	PTX3	GSN	COX4I2	NOTCH3	IGFBP6	ITLN1	SOD2	PDGFRA
	GPC3	GSN	HSPA1A	TXNIP	IRF1	IGF1	VASP	SUSD5	HAS1	ACTA2	CCDC80	ANGPT1	COL12A1	MGST1	CALD1	MFAP4	EDNRB	CXCL1	ID4	CNST	CPXM2	PAMR1	GRP	CCL2	C7	AQP7	HES4	MMP23B								COL1A1		COL4A2			FIGF	DKK1	SLC43A3	MYL9	MCAM	ANGPTL2	COL11A1	CA12	F2R
	LBH	CD34	MFAP2	TMSB4X	DNAJB1	MMP2	ECM1	ITGA8	NR4A1	TAGLN	SFRP4	MFAP4	MMP1	SERPINF1	PPP1R14A	HERPUD1	MIR4435-2HG	HSD11B1	MYLK	CRIP1	PTGFR	FXYD1	ITGBL1	IL34	ZBTB16	ARHGAP6	COL10A1	CPXM2								COL1A2		LHFP			LTBP4	SERPINB2	S100A16	PKIG	ARHGDIB	CTHRC1	THBS2	CD82	FENDRR
	FMO2	SFRP1	DNAJB1	COX4I2	RGS16	ISLR	NES	MYH11	CFD	INHBA	PCOLCE2	PPP1R14A	TAGLN	PTN	CRISPLD2	MEG3	CXCL3	MGST1	PCP4	SLC25A4	WNT2	ZBTB16	COL8A1	ABI3BP	CAPN6	ASPA	ELN	COL14A1								COL3A1		PPP1R14A			SEPP1		S100A10	TPM2	ADIRF	TNC	HTRA1	AKR1B1	TMEM176B
	ANGPT1	IGFBP4	LRRC15	GUCY1A2	NR4A1	SERPINF1	CDC42EP1	ACTG2	ANXA1	COL10A1	SFRP2	G0S2	SPARC	MEG3	TPM1	S100A2	NPTX2	MMP2	CALD1	CREM	ADAMTSL1	SLIT3	COL14A1	CYP7B1	SCARA5	ATOH8	THBS4	ITGBL1								COL5A1		EGFL6			ADH1B		OLFML3	GJA4	MEF2C	TIMP2	COL10A1	WNT5A	RBP1
	LTBP2	HSPB6	COL8A1	LHFP	ADAMTS4	PDGFRA	GAPDH	PCP4	CXCL12	TPM1	OGN	CES1	COL5A2	TNFAIP6	ADIRF	RHOQ	EPAS1	PLAT	CNN1	ADAMTS1	FBLN5	HSPB6	ADAM12	F10	DLK1	ATP1A2	NKD2	WISP2								COL5A2		NOTCH3			CTGF		LPAR1	TINAGL1	TFPI	ANTXR1	IGFL2	GAPDH	PROCR
	INMT	GFPT2	RAB31	GJC1	SERTAD1	C3	ELOVL2	NTRK2	FGF7	POSTN	SCARA5	AOC3	ASPN	MMP2	PLN	PCOLCE2	IL1RL1	TIMP1	MT1X	APEX1	DPP4	IL6	OLFML2B	COLEC12	MEG3	ATP8B4	OLFM2	CILP2								COL6A3		PTN			PTGDS		HTRA3	PPP1CB	LHFP	LY6E	CTHRC1	MT2A	CTSC
	MACF1	IGFBP6	INHBA	MALAT1	H3F3B	EFEMP1	CCR10	ACAN	KLF4	GRP	SFRP1	MYH10	COL1A2	AKR1C1	NDUFA4L2	MGP	SPARC	CFD	DSTN	ADAMTS9	P4HA3	FBLN5	ELN	CXCL10	TAC1	BMP5	COL6A3	COL8A1								COPZ2		COL18A1			SCN7A		UGDH	BCAM	PPP1R14A	ADAMTS2	SFRP4	MMP3	BMP4
	AOC3	HAS1	CTSK	SEPT11	HLA-E	COL8A1	RFTN1	DSTN	EMP1	CST1	FBLN1	FMO2	IGFBP2	FGF7	MT1M	RSPO3	TPPP3	FST	GJA4	HES4	CCDC80	OGN	PLPP4	EMILIN1	THUMPD3-AS1	C1QTNF7	LRRC17	GAS1								CRISPLD2		ACTG2			PRELP		PDGFRA	UBA2	GJA4	MMP2	CLDN4	G0S2	TMEM176A
	MAMDC2	IGF2	THBS2	ARHGDIB	MYC	SFRP1	GMFG	KCNAB1	GPRC5A		LEPR	GPM6B	COL11A1	FGF2	SYNPO2	C7	HIGD1B	LUM	LPP	SORBS2	PRICKLE1	PLA2G2A	CREB3L1	GGT5	GMFG	C4orf32	COL3A1	COL3A1								CTSK					MAMDC2		MEDAG	ARHGEF17	SEPT4	PDPN	C1QTNF3	TMEM158	A2M
	FHL1	MT1A	ITGBL1	IFITM3	C11orf96	PODN	ENPEP	CSDC2	SRPX		EFEMP1	NPNT	VCAM1	HSD11B1	TPPP3	CD55	ADAMTS9	SFRP4	GADD45B	MYH11	GALNT12	CHRDL1	FBN1	EGFLAM	CYGB	CA3	THY1	OMD								DCN					FHL1		COL1A2	IRAG1	CHCHD10	COL6A3	AEBP1	MIF	TCF4
	GPX3	FBLN1	PRSS23	CCDC102B	UBB	DCN	PPP1CA	SORBS2	MT2A		MYOC	DST	THBS2	MFAP4	C2orf40	CFD	COL4A1	IGFBP2	MT1M	ADRA2A	ABI3BP	CYGB	LOXL1	PLXDC1	CCL8	CAB39L	HTRA3	COL11A1								ENTPD4					DST		FBLN2	MOB2	STOM	KIAA0930	AGR2	AP2S1	FOXF1
	PPP1R14A	TNXB	SPARC	HMGB1	CEBPD	CXCL14	CLIC1	NET1	MEDAG		CXCL14	SPINT2	COL5A1	RHOBTB3	C11orf96	THBS1	PMEPA1	SNCA	ACTB	CMSS1	GALNTL2	FGF7	MATN3	CXCL11	VCAM1	CADM3	TMEM204	CILP								EPYC					AOC3		MFAP5	SORBS2	COX4I2	F2R	IGHG3	TNFAIP6	WNT5A
	ITGA8	GPRC5A	FNDC1	CPM	EIF1	ITM2A	MIR4435-2HG	KCNA5	IGF1		CPE	FGFR4	TNC	CLMP	ID4	PTN	ANGPT2	SFRP2	CSRP1	CYCS	RSPO3	PI16	LRRC15	CCL8	FMO2	CCDC69	SEPT11	NEXN								FAP					INMT		MGST1	CNN1	ANGPT2	S100A4	SFRP2	SAT1	EDNRB
	SPINT2	PTGIS	NME2	STEAP4	DNAJA1	DIO2	MYL12A	TAGLN	MGST1		C3	SCN7A	TGFBI	PDPN	NOTCH3	DNAJB9	TIMP3	RHOBTB3	PPP1R14A	PTP4A3	LOC100288077	PLAC9	COMP	CXCL3	FBLN5	CD14	COMP	ASPN								FBN1					NPNT		LSP1	ESAM	LINC00152	SPATS2L	CD55	FTL	PITX1
	DKK3	CTSL	BAG3	KLK3	PPP1R15A	FBLN5	FAT1	SPEG	MCL1		FGL2	GPX3	COL10A1	C1R	PDK4	DCN	IFITM3	IL6	MT1A	NDUFS2	PODN	WISP2	ISLR		COLEC12	CD34	TNFAIP6	RARRES2								FN1					ELN		MMP2	MCAM	TINAGL1	CD74	TACSTD2	SEC61G	WARS
	SPTBN1	DCN	COL12A1	CPE	SLC2A3	HTRA3	COL18A1	FHL1	CEBPD		AKAP12	PRG4	PLAU	C1S	MYLK	PAGE4	GAPDH	PDPN	FLNA	PHLDB2	CHRDL1	PTX3	P3H1		PDGFD	CD36	ID4	FIBIN								GREM1					USP53		DPEP1	TAGLN	ITGA1	GPNMB	EPYC	CXCL1	HSD17B2
	NPNT	RARRES1	CD99	IGFBP7	STAT3	OGN	PHPT1	NTRK3	S100A10		C1QTNF3	LBH	TPM2	LTBP4	HES4	AKR1C1	MAP1B	CCN1	MYL6	ATP1B3	CILP	CCL2	COL11A1		GADD45G	CDH6	GGT5	TMEM119								HNT					G0S2		LOXL1	CSPG4	ESAM	SULF2	FBLN1	DCN	TSPAN33
	FGFR4	ITM2A	HSPA8	MYO1B	IER2	MXRA8	RP11-879F14.2	ADIRF	UAP1		GPNMB	GDF10	SULF1	IGFBP5	FRZB	THAP2	TINAGL1	ARSG	TCEAL4	SRL	PRDM6	CXCL3	SEPT11		SNAI1	CDHR3	INAFM1	KERA								INHBA					FMO2		PCOLCE2	RASL12	EPS8	MMP14	LUM	NAMPT	SOX6
	CD82	ERRFI1	FZD1	COL4A1	MT2A	LUM	FOXS1	MYL9	TNXB		C7	ADAMTS8	LGALS1	TIMP1	CRYAB	SDF2L1	MT1A	CLMP	NDUFA4	BCAM	CCL11		NBL1		LSP1	CDHR4	CILP	ID4								ITGBL1							BICC1	RBPMS2	NR2F2	ARL4C	MFAP5	RND3	DLL1
	GDF10	SCARA5	CHPF	EPAS1	CRISPLD2	COMP	PLAT	HSPB7	CEBPB		PTGIS	PTGDS	MMP14	MGP	MFGE8	LIF	KCNJ8	DKK1	ECRG4	MCAM	CAPN6		SPON1		CCL2	CHRDL1	OLFML2B	GRP								LOX							DCN	TPM1	PGF	DPT	IGKC	TPI1	PLAU
	MYH10	CFD	HSPH1	ADGRF5	BTG1	MGST1	LIMS1	SNCG	PNRC1		DCN	MAMDC2	PFN1	SFRP2	FOXC2	FGF2	RNF152	FGF7	GADD45G	KLF9	PDGFRL		SULF1		IL6	CIDEC		COMP								LRRC15							LUM	PPP1R12A	MAP1B	TMEM176B	PPIC	HIF1A	PPP1R14A
	CAMK2N1	IGF1	NOX4	ITGB1	CDKN1A	S100A10	TPM4	KCNMA1	SOCS3		PDGFRL	QSOX1	THY1	IGFBP2	EFHD1	IL33	ADIRF	ANXA5	TM4SF1	CRISPLD2	PTGS2		FNDC1		PTGS2	CLEC3B		DPT								LUM							GFPT2	ITGA7	CCDC102B	NTM	COL1A2	IER3	PCDH18
	CFD	CD248	ATP6V0C	EPS8	BTG2	TSHZ2	POLR2G	NPNT	PTGDS		CST3	BMP5	ISG15	RND3	LPP	GPRC5A	IFITM2	SFRP1	DUSP1	DSTN	SEMA3D		CNN1		NR2F1	COL21A1		ELN								MFAP5							ADAMTS2	ATP1B2	ADGRF5	FBLN2	MFAP2	OAZ1	PAG1
	TIMP3	MYC	MATN3	CA4	NEAT1	DPT	CERS6	SLC38A1	FOSB		ITM2A	TGM2	FBXO32	PRRX1	CNN1	DUSP1	NR2F2	DCN	CCL2	H3F3B	DPT		MIAT		F10	COX4I2		FBLN2								MMP11							MFAP4	S1PR3	SPARCL1	SERPINE2	FIBIN	PKM	DKK3
	PLEKHH2	MAT2A	PDGFRL	PPP1R14A	HES1	MFAP5	HTR1F	LMOD1	NFKBIA		RSPO3	DKK3	BGN	SPON2	SORBS2	CD24	ID4	SERPINE1	CKB	ADAMTS4	NOX4		MMP23B		CEBPA	CTSG		IGF1								MMP2							SERPINF1	MEF2C	UACA	NBL1	PDGFC	MT1E	ETS2
	TSPAN8	PODN	SERPINH1		BRD2	CTHRC1	GNG11	SOD3	CXCL2		MGST1	ITGA8	SERPINH1	RARRES2	SLC25A4	HMOX1	STEAP4	EMP3	ID3	PLN	ZFHX4		CPXM1		KDM6B	CYP21A2		IGF2								MXRA5							COL1A1	SNCG	CRIP2	POSTN	CLDN3	IL11	RGS10
	TFPI	CLU	MMP11		HSPA8	S100A6	LPL	BCAM	THBS1		TXNIP	TIMP3	PMEPA1	EMP3	LGI4	CREB5	COX4I2	APOE	FHL1	BNIP3L	EPYC		FIBIN		PID1	CYP3A5										NOX4							RNASE4	PTP4A3	EBF1	CMTM3	NBL1	ALDOA	VCAN
	SERPINA3	MT2A	ASPN		PHLDA1	MMP23B	GSTK1	AKAP1	CCL2		SERPINF1	CRIM1	IGFBP3	GEM	LMOD1	MANF	TMSB4X	FBLN1	STEAP4	LBH	DCHS1		P4HA3			CYP4B1										NUAK1							SCARA5	MYH11	KCNJ8	PPIC	ASPN	GSTO1	C9orf16
	CSRP1	CST3	CNTN1		PNRC1	LTBP4	TPPP3	PGAM2	OGN		UAP1	CAMK2N1	TIMP1	COL6A2	MT2A	IGF1	HIPK2	PTN	PALLD	SYNM	DNM3		GXYLT2			CYP4F12										OLFML2B							FBLN1	MYLK	GMFG	ARPC1B	SLC44A1	MMP14	PDLIM1
	FBLN5	UGDH	GOLM1		JUND	LTBP2	CSPG4	CSRP1	GSN		CLEC3B	CSRP1	HOPX	DKK3	ACTG2	DPT	EPS8	IL32	PDLIM3	TPM2	COL6A6		CILP2			CYP4X1										PLAU							IGFBP6	FILIP1L	MIR4435-2HG	COL12A1	MMP11	MT1X	ITIH5
	PMP22	DDX21	COL1A1		CCL2	PCOLCE2	ZNF428	CASQ2	DPT		CD34	FBLN5	CTSB	SERPING1	MT1E	HSP90B1	ADAMTS4	AKR1C1	ADIRF	EPAS1	CPZ		P3H4			DACT2										POSTN							HEG1	NOTCH3	ARHGAP15	PODNL1	FAP	CHI3L1	CARD16
	TACC1	ABLIM1	AEBP1		NR4A2	CTSK	LRRC32	DES	PLA2G2A		KLF4	SGCA	VCAN	LAPTM4A	ADRA2A	EIF1B	COL4A2	GNG11	SYNPO2	PGAP1	FLRT2		CCDC80			DGAT2										RAB31							CCDC80	RCAN2	OAZ2	LUM	CD9	SELM	ATP2B1
	PTGDS	ANGPTL4	HSP90AA1		HSP90AA1	OMD	HEYL	CRYAB	NAMPT		AOX1	CD82	PRSS23	LGALS3BP	STEAP4	IL6	RPL29	TWIST2	ADAMTS4	CDKN1A	NEGR1					DGKB										SERPINF1							PI16	EPAS1	MYO1B	CERCAM	FN1	CCL3	EDIL3
	SLIT2	AKAP12	CPE		ADAMTS1	CYP1B1	ARPC2	SH3BGR	ITM2A		OMD	CCBE1	GJB2	GPM6B	PCP4	SAT1	KLF6	RND3	JUNB	TSC22D1	BMPER					DNASE1L3										SFRP4							C3	CYSTM1	A2M	MXRA8	COL12A1	IL7R	MEST
	BMP5	NOP16	CD55		MT1A	FLRT2	GTF2F2	PDLIM3	RGCC		PODN	SRGN	MYL9	TWIST2	TIMP3	RARRES1	PROCR	GSTO1	CDKN1A	CRYAB	LOC255480					DPY19L2										SPARC								RASGRP2	ARHGAP29	PLXDC2	CTSK	IL6	S100A13
	RGCC	OSR1	MXRA8		PABPC1	PI16	ADAP2	SORBS1	JUND		MEDAG	RARRES2	GREM1	PCOLCE	ADAMTS4	PLK2	MTHFD2	TFPI	C12orf75	SLC7A2	CXCL12					EBF2										SPOCK1								ACTA2	CAV1	CD82	LAPTM4A	RPL28	DMKN
	ROBO2	LRRN4CL	SYT1		CCNL1	MGP	LAMC1	NAV2	NNMT		ACKR3	PMP22	GAPDH	PDGFRA	MAP1B	MEG8	RPS7	FGF2	THBD	KCTD20	HTRA3					EBF3										SULF1								FLNA	SOD3	CDH11	CDH11	STEAP1	PDPN
	TBX2	AKR1C1	CNN2		CSRNP1	C1S	EIF4EBP1	FHL5	ZFP36		GPRC5A	WNT2	FAP	FBLN2	CPE	CST3	CALD1	IGFBP5	MT1E	TAGLN	DIO2					ECM2										THBS2									CRIP1	UBE2L6	COL8A1	CXCL3	RCN2
	MGP	ACSL4	PERP		KLF2	IGF2	BTF3L4	HACD1	PIM1		ADD3	LTBP2	PKM	SPOCK3	RCAN2	KLF4	COL3A1	OAF	ID2	C11orf96	TNNT3					ESAM										TIMP3									PDGFRB	CCND1	APOD	C15orf48	CISD1
	TAGLN2	C7	CMTM3		GJA4	BNC2	SF3B5	DACT3	CPE		C16orf89	MCOLN3	COL4A2	ANXA5	FLNA	SELENOK	SPARCL1	GYPC	SH3BGRL	CCNH	COL6A3					F10										TMEM158									PTP4A3	COL1A1	CD99	FAM20C	PTCH1
	G0S2	GPNMB	OMD		ZFP36L1	TMSB10	PLOD1	CCDC3	GFPT2		NDRG1	MALAT1	COL6A3	SOD3	PDGFRB	PTGES	CPM	ATP2B1	ISG15	MT1E	KCNK2					FAM162B										TNFAIP6									CD59	PHLDA3	CHPF	ENO1	TRPA1
	CCBE1	LSP1	TMEM45A		MT1E	MOXD1	MCAM	PRR34-AS1	SOD2		FBLN2	ROBO2	TPM4	CTSK	DSTN	INSIG1	RPL18A	MIR100HG	ATF3	HSPE1	KERA					FAM180B										VCAN									IGFBP7	MFAP2	PALLD	CXCL6	LAMA4
	LITAF	TGFBR3	RUNX2		MAFF	PLXDC2	IFI27	DUSP26	KDM6B		CLU	PIEZO2	COL4A1	CEBPB	DES	C1R	RGS16	PRRX1	ALKAL2	YBX3	COL11A1					FBLN5																			HIGD1B	COL1A2	ANTXR1	DDIT4	FOXF2
	ADAMTS8	KLF9	EEF1G		HSP90AB1	S100A13	POMP	PRDM16	FSTL1		ABCA8	LPL	ADAM12	PCOLCE2	PTP4A3	ADM	SLC25A6	SLC25A37	TIMP3	FOSL2	STMN2					FHL5																			FOXS1	SLC9A3R2	XIST	WTAP	INSC
	MAOB	MGP	FIBIN		CSRP2	CHRDL1	ZBED6	EDIL3	FBLN2		EBF1	CD302	MFAP2	SFRP1	KCNE4	LUM	CD59	BDKRB2	MAP1B	GADD45B	SYNDIG1					FNDC5																			GJC1	ISG15	DCN	ITGA5	PDGFD
	ZYX	FOSL1	CADM1		UBE2S	THBS2	MRPS18B	WIF1	NR4A3		ABLIM1	CDH11	FNDC1	LPAR1	MT1X	PLAUR	NGF	CYP1B1	UQCRB	MYL9	ISLR					FRMPD1																			ADAMTS1	C4orf48	FBLN2	TYMP	CTSS
	MYLK	ALDH1A3	PODNL1		THUMPD3-AS1	IL32	RPL7A	HRH2	MFAP5		ABCA10	SVEP1	ARL4C	DPT	SYNM	SQSTM1	MT1M	S100A13	SMTN	H2AFJ	COL10A1					FZD4																			TBX2	GPR68	IGFBP3	MGST1	WNT4
	SPARCL1	NR4A3	SFRP2		EIF4A3	MRC2	OSTC	MT1X	ABL2		SCPEP1	MYO10	CALD1	C7	MYL6	TACSTD2	PDLIM1	PDGFRA	MYC	CDH6	ADH1B					G0S2																			PDGFA	WARS	C3	PDPN	CYGB
	SERPING1	SPARCL1	PTK7		KLF4	COL10A1	TGFB1I1	DMTN	SGK1		C1R	ADH1B	ISLR	EFEMP1	IGFBP6	PSAP	MYC	MPZL1	MT-CO1	DNAJB1	OMD					GDF10																			FAM162B	TMEM176A	PRELP	IL1B	CTSH
	SLC40A1	CBLB	KIAA1217		TUBA1A	BICC1	BGN	SLCO5A1	CILP		BIN1	ZYX	LOXL2	PID1	PALLD	KCNK1	RPS2	LTBP4	MTRNR2L12	HIPK2	GAS1					GHR																			C20orf27	GUCY1A3	S100A16	PDGFRA	NDUFA4
	NFIB	44258	COL1A2		EIF4A1	SEMA3C	MEST	SELM	UGDH		LRRN4CL	N4BP2L2	COL8A1	KCNK1	CKB	SERPING1	SPRY2	BASP1	LMCD1	NR4A1	PTX3					GPD1																			EDNRA	RP11-400N13.3	COL3A1	TNC	F2RL2
	NRP1	ABCA8	GAS6		TUBB4B	EPSTI1	SERPINH1	GADD45G	FBLN5		CYBRD1	METTL7A	S100A16	SDC2	FHL1	AKR1C2	C20orf27	FTH1	GLUL	AXL	FLNC					HBA1																			IGFBP2	MMP11	COMP	PGK1	SEMA4D
	GPM6B	SLC19A2	NR4A2		MYLIP	CREB3L1	GLIPR2	PCDH10	ADAMTS1		CPXM2	HMCN1	EGFL6	TNFRSF12A	GADD45B	S100A10	GPX3	LAPTM4A	TMSB4X	CALD1	SPON1					HBA2																			ENPEP	LGALS9	PDGFRL	MMP2	COL12A1
	MOXD1	AOX1	NREP		ID3	SCARA5	GRN	CRIP2	ADH1B		SCN1B	FRAS1	TYMP	COL6A3	BGN	CSTB	PTMA	PID1	KCNE4	ODC1	CST1					HBB																			PTK2	AEBP1	VCAN	COL6A2	FHL2
	DST	C16orf89	RGS16		DYNLL1	CLMP	KCNE4	PPP2R2B	WISP2		PID1	APLP2	COL18A1	LIF	FXYD1	SPATS2L	COL18A1	CHIC2	MT-ND4	ARID5B	CNTN3					HBD																			ADAP2	PSMB8	COL1A1	CYBA	PTPRE
	DPYSL2	PCOLCE2	CERCAM		SLC25A5	TMEM119	TRIP6	NTF3	GPX3		CADM3	ADAM9	PDLIM7	AEBP1	ISYNA1	HMGA1	ADAMTS1	IER3	COMMD6	SBDS	COMP					HIGD1B																			PRSS23	CTSB	PLPP4	NDRG1	WFDC1
	C7	ABI3BP	ID3		HLA-C	CCDC80	CCT3	SCARA3	S100A4		MTUS1	LSAMP	CHI3L1	IGF1	SOD3	FTL	JUN	CTSK	HSPB1	PDLIM5	CD177					HRCT1																			MAP3K7CL	RAB31	MXRA8	S100A13	CST3
	METTL7A	OAF	GRP		ABHD5	FTL	GIPC1	AKAP6	IL6		CNTFR	ADARB1	ITGA11	SNCA	TINAGL1	RNASE4	RPS18	ANKRD28	CD151	HIST1H1C	MFAP4					IL33																			CLIC1	FBN1	CCDC80	PDLIM4	BMP5
	PLXDC2	CHD1	GABARAP		HSPA1B	ABLIM1	CYBA	RAMP1	HAS2		SH3BP5	PTGER4	ALDH1A3	BTG3	ADAMTS1	SOD2	PDK4	TNFRSF12A	EIF3E	ZNF503	LSP1					KANK3																			CSPG4	WNT2	KIAA1217	S100A6	APLP2
	SRGN	ADH1B	MAGED1		CEBPB	C1R	MAGED2	FAM46B	PLAC9		RGMA	ITIH5	MXRA5	DNAJB9	CPM	MATN2	TUBA1B	CYGB	TGM2	WSB1	F13A1					KCNA2																			MGP	VCAN	MXRA5	PTGS2	ZEB1
	IGSF10	PLAC9	HSPB1		MIDN	SDF4	CHN1	MSMB	IGFBP6		NPR1	COL13A1	MICAL2	NBL1	RRAD	RPRM	PDGFRB	NBL1	TCIM	PIP5K1B	PLA2G2A					KCNAB1																			LURAP1L	BRI3	DPYSL3	RAB13	CCDC186
	MAL	SERPINF1	C1QTNF3		PLK3	CXCL12	LDHB	REEP1	FBN1		GALNT15	LIMS1	MARCKS	RARRES1	RHOB	COL14A1	RPS8	SOD2	MUSTN1	FOXC2	GDF10					KLF2																			OLFML2B	SPOCK1	PERP	RPS10	ISG15
	CHRDL1	MT1M	DNAJB4		UBC	CRABP2	INAFM1	GADD45B	BDKRB1		ACKR4	SLC40A1	KIAA1217	FGFR1	KLF9	TXNRD1	ZBTB38	SPON2	HES1	HMGB2	UST					KRT222																			CSRP2	CD276	PRSS2	IL24	VWA5A
	EMP2	HNRNPAB	FN1		RGCC	VIT	PDLIM1	SNX10	TPPP3		TNNT3	MAOB	MYH9	THBS2	MTHFD2	BTG3	HSPA1A	CD63	PDLIM7	CCDC107	FHAD1					LIFR																			GUCY1B3	SPHK1	ITGBL1	WLS	MGLL
	EZR	WT1	FOS		ATF4	CGNL1	RPLP0	MXI1	RASD1		LINC01133	BTG1	SERPINE1	BNIP3L	ZFHX3	DNAJB11	KCNE4	S100A11	RGS16	LRRFIP1	OGN					LMO3																			OLFML2A	HOPX	OSTC	SLC39A14	CXCR4
	CD4	PLIN2	COL8A2		OAZ2	CPVL	ANXA6	MYOCD	MT1A		FAIM2	LRRN3	ACTN1	CST3	CSRP1	CEBPB	ISG15	THBS2	S100A4	FRZB	LIPG					LRAT																			FRZB	SFRP4	HSPG2	BNIP3	WNT2
	PTPRS	CYP1B1	FAP		FUS	DPYSL3	ATP5C1	LPP	CXCL14		PROS1	OMG	PHLDA1	MPZL1	EPS8	CSRP2	MFGE8	PLIN2	MT-ATP6	ZNF331	SORCS2					LRP1B																			ISYNA1	GOLM1	SPON1	C14orf2	SMPDL3A
	PDE5A	NAMPT	MXRA5		VMP1	GAS1	TAGLN2	SORL1	PI16		NT5E	COL6A5	MYL6	IL32	PRKCDBP	UAP1	JAG1	CAV1	BTG2	ACTA2	FGF7					MLXIPL																			JAG1	THY1	FBN1	PLAUR	LSP1
	LAMA2	MFAP5	ZFAND2A		CDC42EP4	DAB2	CD59	TSPAN2	APOE		PTGFR	RYR2	SPHK1	FXYD6	ZNF331	CD9	MYL9	MGLL	MAT2A	CPE	ABCA9					NEGR1																			CAV2	RHBDD2	MMP2	PLIN2	GPC4
	ITIH5	LDHA	NR4A1		HSPA1A	ABI3BP	RPS7	KCNMB1	IL8		ESR1	COL21A1	SPATS2L	IGFBP6	NR4A1	CTH	RPLP0	UFM1	TINAGL1	HMGN2	WISP2					NOVA1																			EGFL6	STAT1	CPE	CTSB	RARRES3
	HSD11B1	TOMM5	CDC42EP3		RHOB	COL16A1	RPS19	AQP1	ARC		VIT	NEBL	P4HB	PRELP	SH3BGRL	ATP1B1	PPP1R14A	NINJ1	CRISPLD2	MT1X	BEND6					NPR1																			ECE1	TMEM119	SERPINF1	MME	ALDH1A3
	SLIT3	CRIP1	TUBB3		MCL1	CD34	PFN1	BTC	PTX3		NTN4	TBX2	NREP	REEP5	GPX3	FNIP2	NOTCH3	LUCAT1	PPDPF	ZBTB38	ADH1C					NPY1R																			DUSP14	HTRA1	ANKH	NOP10	VAMP5
	TSC22D1	IL33	NPTX2		SERTAD3	PTGFR	CFL1	PLP2	TNFAIP6		MBP	NTNG1	HTRA1	FSTL1	CCDC107	PRDX1	TCIM	IL33	TOMM7	PDE1A	GRIA3					NTN1																			PLAC9	THBS2	MORF4L1	LGALS1	RARRES2
	PDK4	CTSH	PPP1R15A		MIR22HG	FGL2	CLTA	FLNA	MT1E		LMO3	FMO3	PTMA	MATN2	LBH	C1S	RPS26	IGFBP7	RPL10A	MALAT1	FAT4					NTN4																			EPAS1	COL7A1	SCUBE3	PID1	ADH5
	RGN	CDKN1A	EGR1		SLC25A6	FGF7	SLC29A1	BRSK2	MT1X		NPY1R	GRIA1	PTPRE	COL6A1	PDLIM3	PNPLA8	RPL8	ABL2	MT-CO3	PPP1R3C	FNDC1					PCOLCE2																			ARPC5	LSAMP	EDIL3	ANGPTL4	HSP90B1
	ETV1	THBS1	NT5E		LMNA	ITGBL1	CADM1	HSPB8	CXCL1		FAM180B	RGN	CHN1	CREB5	NDUFS2	WSB1	GAS5	DKK3	CHMP1B	PNP	SCARA5					PGM5																			HEYL	ADAMDEC1	ISLR	CXCL2	PKIG
	PRELP	NFIA	PAM		EGR2	PDGFD		PRUNE2				TMEM108	CFL1	GSTM3	HSPB1	CHD2	HSPB1	CNN3	MTRNR2L8	PRKAR1A	IGFL2					PID1																			TSPAN15	PTN	SPARC	NINJ1	ST5
	SGCA	RABGEF1	PDGFC		TUBA1B	ZFHX4		LGR6				RSPO2	SLC16A3	TFPI2	EPAS1	SRSF5	RPS28	GSTM3	HSPB6	GABARAPL1	KIAA1199					PLIN1																			ADAMTS4	PSMB9	DIO2	ATOX1	EMILIN1
	APLP2	LEPR	HCFC1R1		HIST1H4C	IGFBP3		CAMK2G				LINC00968	ARPC2	SLC39A14	KIAA0040	MARCKSL1	RPL35	FSTL1	COX6C	HRH2	PI16					PLIN4																			FAM13C	ELN	FNDC1	POMP	COL4A5
	QSOX1	IL6ST	ACTB		TLCD2	ELN		RYR2				TRPC6	PXDN	CCK	JUNB	ITM2B	RPL10	PAPPA	ACTG1	KCNE4	LOC728640					PPARG																			CCDC3	ADAMTS12	MARCKS	GK	MMP11
	CRIM1	EBF1	CD83		ARIH1	SH3BP5		ACVR1C				FHOD1	CILP	CCDC80	NDUFA4	OGN	RPL7A	TXN	LMOD1	RPS27	C3orf55					PPP1R1A																			EFHD1	EPDR1	RCN3	PHC2	PSD3
	EDNRA	EIF1B	SMIM3		MT1M	S100A16		LRRC2				FAT3	PLOD2	UFM1	ATF3	EMP2	HNRNPDL	TNFAIP2	COX7C	FAM107B	AOX1					PRG2																			NEURL1B	FBLN5	PAM	GAS1	CST1
	DOCK4	CREB5	CYP26A1		PPP1R10	ABCA6		SYNM				CASS4	ENO1	IL6	BCAM	RORA	PHLDA1	ITM2B	IFITM3	GUK1	CLCN4					PXDNL																			CDH6	IFI6	COL6A3	HSD11B1	IGFBP7
	FMO3	NCL	GEM		IL6	LEPR		DMPK				RSPO4	ACTR3	ARSG	S100A4	AL022334.2	PALM2-AKAP2	COL6A3	CFL2	MYL6	HS3ST3A1					REEP1																			KIAA0040	FMOD	ARL6IP5	RPS19	AKR1B1
	NKD2	SPSB1	CREB3L1		HERPUD1	RARRES2		TPM2				MCOLN2	LPP	TFPI	TCEAL4	GFPT2	SLC25A5	ATP6V0E1	PDGFRB	PPDPF	TMEM176B					RET																			RASGRP2	EMP3	PCOLCE	TMEM208	MME
	FN1	ADGRD1	IGFL2		H2AFX	LRP1		LIMS2					GOLM1	RHOQ	SMTN	GPX3	SNAI2	MMP14	MT-ND3	CTNNB1	CST2					S1PR1																			SMOC2	COL6A1	MATN3	CSF3	LDLRAD4
	RASGEF1B	TUBB6	FSCN1		CTD-3252C9.4	CFH		DMKN					RUNX1	FST	RGS16	ANG	LDHA	GPM6B	LGALS1	COL4A1	FBN1					SCARA5																			44446	ITGA11	HCFC1R1	SPHK1	DDHD1
	LTBP4	ATP1A1	APOD		YBX3	TNXB		ACTB					CERCAM	G0S2	CREM	ATP1A1	LGI4	VCAN	ESD	TPM4	GXYLT2					SCARF1																			ARHGEF17	APP	POSTN	CEBPB	TCF21
	SLC38A5	DCLK1	ARF4		NAMPT	TNFSF13B		NUDT4					UNC5B	MT2A	APOLD1	SPOCK3	RPS19	GLIPR1	FOXC2	MTRNR2L12	FGL2					SCN4A																			MTHFD2	KDELR3	SLC6A6	PDCD5	MGAT5
	ABI3BP	ATP1B3	LOXL2		SEMA4A	MXRA5		HADH					RGS16	CFH	MAT2A	ANXA2	MARCKS	PLAUR	CRIP1	PPP1CB	GABRB2					SCN4B																			PTGIR	FOXF1	FOXP1	NFKBIA	RP11-356J5.12
	ALDH1A1	EGFR	MMP14		TOB1	COL1A2		SNTA1					WDR1	LMO4	MYC	TGFBR3	ATP5MC2	SPCS2	NAMPT	LDHA	COL3A1					SDPR																			PDLIM1	MRC2	PMP22	TMEM45A	ECM1
	CALM1	SCGB3A1	HLA-C		KDM6B	INMT		CRIM1					PRELID1	GSTO1		REEP5	LAMA4	SYPL1	PFDN5	MT-CO1	SLC1A7					SEC14L5																			CPM	LTBP4	FCGBP	RRAD	MCTP2
	SFTA1P	SEMA3C	CKAP4		KPNA2	LSAMP		CX3CL1					EPSTI1	OSBPL8		RYBP	RPL32	PGRMC1	SVIL	MAP3K20						SEMA6C																			DLC1	MXRA5	TIMP2	TMEM132A	PYCARD
	ARL6IP5	FXYD1	PALLD		APOE	IGFBP6		ITIH3					TUBA1C	UAP1		MGST1	RPL3	ANXA1	RPL31	CPM						SERINC4																			KCNE4	RIN2	SULF1	RPS28	CH25H
	RHOJ	SLPI	SMCO4		SAT1	COL11A1		MYL6					TMEM158	THAP2		TUBB2A	RPL37A	SLC39A14	PROCR	RNF152						SGCA																			VASP	FAP	FXYD3	SUB1	GDF15
	TNS1	PLTP	FBLN2		PIM3	GSN		PGM5					SDC1	IER3		NR4A3	COL1A2	WIPI1	RPL3	UTRN						SH2D1A																			COX7A1	COL8A1	LOXL1	DAD1	CPED1
	SLC29A1	PAMR1	DPYSL3		CA2	PTGIS		AMIGO2					CPXM1	OAF		MARCKS	FSTL3	CTSL	PNRC1	H1FX						SLC16A12																			SEPW1	GAS7	GPX8	LMO4	IGFBP3
	WNT2	ADAMTS15	CRTAP		GEM	NOX4		AC093390.1					WNT5A	GPRC5A		FXYD6	HLA-B	GPNMB	ATF4	PSMD12						SLC19A3																			EGFLAM	TYMP	TTC3	PFKFB3	SSRP1
	NR2F1	CLDN11	UBC		OPA3	NEGR1		MRAP2					CALU	DKK1		TXN	IGFBP7	TNIP1	TGFB1I1	LPP						SLC1A2																			ABCC9	SERINC5	GPNMB	GLUL	TGFBR2
	GOLIM4	TMED5	BASP1		DNAJB4	PDPN		FOXC1					FSCN1	CRYAB		NPC2	RPS5	SAT1	SNHG29	FILIP1						SLC2A4																			C1orf54	ITGB5	RERG	BEST1	MPG
	SOD3	NOP58	LAMP5		HN1	GJA1		MTSS1					ANGPTL2	THBS1		UGDH	RPS4X	MGP	ZFP36L2	MFGE8						SLC7A4																			LRRC32	ZFP36L2	IGHG4	LPAR1	CARHSP1
	LTBP1	CREM	ANKRD37		SOX4	A2M		FAM46C					ITM2C	PLPP3		CLMP	HES4	FOXF1	MT-CO2	MTHFD2						SLC8A1																			GUCY1A2	CLMP	CMTM3	VDAC1	LAMC1
	TSPAN3	WDR43	SULF1		HOPX	COLEC12		FCMR					CMTM3	AKAP12		MESD	ZEB2	PLTP	RPL7	FCER1G						SMOC1																			APOLD1	PERP	OLFML3	ACSL4	PHACTR2
	ZNF106	ADIRF	CRNDE		LSMEM1	CILP		ARC					CA12	INHBA		TMED5	SGIP1	C1S	RPL22	BAG3						SPAG17																			ANO1	CREB3L1	PLXDC2	CLMP	C5orf56
	PRG4	SRPX	GREM1		ID1	LOX		SLC25A4					ACTR2	ADM		ERN1	ETS1	FBLN2	RPL12	PHLDA2						SPRR2F																			SDC2	IFI27L2	LRRC15	UQCRH	LTBP4
	STON2	PI16	DUSP1		EDNRB	MFAP2		SCX					RCN1	HSPA5		SPAG9	ASAP1	PAMR1	FXYD1	PITPNC1						STEAP4																			EHD2	PDLIM2	HOPX	MMP9	PTGER2
	PEBP1	SERPING1	ITGA11		ARHGAP10	JAM2		PTMA					NOTCH3	GSN		MMP2	SERF2	LARP6	RPS3A	HNRNPA1						TCF7L1																			FILIP1L	CRABP2	EFEMP2	GRINA	KREMEN1
	CD302	ATP6V0C	MDK		HSPB1	CLDN11		WDR1					SLC12A8	CYR61		EFEMP1	THBD	ICAM1	RPL29	SMIM12						TEF																			LGI4	ROBO1	BGN	TOMM7	TGFBI
	ADARB1	OGN	GAS1		GLA	NT5E		VIM					RAB31	APOE		TSLP	NID1	FABP5	RPLP1	GJA4						TNMD																			SERPINI1	IL32	PDLIM5	EVA1A	PSME2
	FAT4	PA2G4	TGFBI		ZSWIM4	SSC5D		HACD4					CAP1	CXCL1		CCDC80	PPP1R15A	AKAP12	RPL21	RERGL						TNNT3																			CHN1	TPST1	TM4SF1	CNIH4	PFN2
	RERG	NME2	ADRA2A		GDF11	RP11-473M20.16		DUSP1					KIF26B	PLAT		RARRES2	THY1	SEC61B	HES4	SLMAP						TNXB																			H2AFJ	RNF213	SSPN	PPIF	FBN2
	CFH	STAT3	VSNL1		SLC3A2	SHPK		FABP3					ADAMTS12	PLIN2		ITM2A	RPL41	SLC4A7	MT-ND1	ETS2						TPSAB1																			HES4	DGCR6L	CERCAM	CCL4	PALLD
	PLTP	FST	LOXL1		RBM8A	RARRES1		RCAN2					NTM	CCND1		RTN4	RACK1	UBB	MT-ND4L	PCBP1						TPSB2																			AVPR1A	ATOX1	LINC00657	MT1F	FAM105A
	ABCA6	ZNF593	TSKU		BAG3	CELF2		MSRB3					F2R	IL33		S100A16	NME2	MTDH	NME4	PABPC1						TRHDE																			RCSD1	TMEM258	GLT8D2	TXN	IL15RA
	CNBP	CRABP2	GLT8D2		DUSP5	HSD11B1		CCDC107					KDELR2	CXCL8		SDCBP	ABCC9	REEP5	ATP5PO	MYOCD						VIPR1																			ATP5B	EPSTI1	ITGA11	TFRC	GMFG
	NR2F2	CILP	C1QTNF1		HSPH1	PLA1A		C10orf10					PDGFC	HERPUD1		AHCYL1	LPL	LMO4	GAS5	NGF						VIT																			NES	GPX8	NOX4	SURF4	APCDD1
	FBLN1	DDX3Y	GADD45B		IRF9	GAS7		CD82					PTN			YWHAQ	EFHD1	AEBP1	RPS24	SNHG15						VSIG10L																			ID4	NUPR1	C1S	TCEB2	ADAMTS9
	KITLG	LIMA1	DSG2		ATP5A1	FBN1		PM20D2					OSTC			ARL6IP1	RPL13	SRPX	ATP5MC2	CTH						VWF																			TMEM74B	NFIC	BICC1	ANPEP	AKR7A2
	RASL12	NFE2L2	RCN3		HEXIM1	BHLHE41		P2RX1					RGS4			LTBP4	RPSA	PDIA6	RPL10	PCP4						WDR17																			GPR4	CHPF	PTTG1IP	TWIST2	FHL1
	CDH11	TXNRD1	PDLIM3			INHBA		FAM129A					PLOD1			ETNK1	PTPN1	SCARB2	GAPDH	RAB21						WNT11																			ASAH1	BTN3A2	MOXD1	CREG1	KIAA0930
	FEZ1	CEBPZ	THY1			PLTP		CRIP1					KDELR3			SRRM2	PPDPF	CRABP2	RPL5	IRF2BP2						ZDHHC11																			SLC25A5	TRAC	CALB2	RUNX2	ITGA1
	PIK3R1	CYBRD1	HSPA6			SLC6A6		LBH					TNFAIP6			SELENOS	RPS9	RAB7A	CALM2	RASSF1						ZNF304																			PPP1R12A	SVIL	MITF	COTL1	MRVI1
	SETBP1	MT1X	DDIT4			BOC		RPS21					VDR			NRP2	RPS17	CLN8	RPS14	MT1M						ZNF839																			CD248	MMP23B	RARRES2	SEC61B	MPST
	ALDH2	CFI	PYCR1			PID1		NRIP2					AFAP1			EIF1AX	YBX1	MPC2	LDHA	PDE3A																									NID1	TGFB1	NET1	ANGPTL2	PTN
	NDNF	SLIT3	MMP19			C1QTNF3		CALM2					GJA1			PGM2L1	RPL19	PRDM1	RPL34	NDUFA4L2																									ETS1	FAM195B	ATP6AP2	PTGES	THSD4
	SFTPC	SLC20A1	LMO7			GPNMB		PDGFC					LAMP5			KDM6B	FRZB	SDC2	RPL27A	GLRX5																									B3GNT2	YIPF2	RUNX2	PHLDA1	CAV2
	TNXB	RSPO3	GNG10			OLFML3		ZFAND1					CHSY1			QSOX1	IL1R1	NPC2	COX4I1	MYLK																									IFITM2	GPC6	PDLIM3	P4HB	GPSM3
	USP53	FAIM2	MIF			SLPI		GFOD1					C12orf75			RAB1A	ACTG1	SEC61G	PPP1CB	PLS3																									CALM2	CALU	ARL4C	MT-CO2	HS6ST1
	ENPP2	COL14A1	WISP1			SH3D19		ZFYVE21					SNRPB			LGALS3BP	YPEL2	SEC62	CALM1	ARHGEF7																									HLA-E	RARRES2	GAS1	ABRACL	WNT5B
	HMGN2	TFPI	ANKH			ABCA9		TRIM36					FXYD5			MIR99AHG	PAG1	TAGLN2	MGST3	JAG1																									OR51E1	HAPLN3	PPDPF	GPX1	TNFAIP2
	RBMS3	C16orf45	ID1			FAP		MYLK					SMC4			FUNDC2	NMD3	SDCBP	RPS4X	GYG1																									SYNPO2	COL5A1	OMD	RPL39	SEMA3A
	FRMD4B	PTRH2	BCAT1			SPON1		LDOC1					SURF4			S100A6	DLC1	LPAR1	IFITM2	MEF2C																									NMD3	SPG21	EPDR1	MMD	GJA1
	LUM	EMILIN2	COL5A2			SPOCK1		WTIP					FAT1			CLDN11	RPL36A	ATP6V1G1	VIM	GAPDH																									KCNS3	LINC01082	GOLM1	MRPL52	PSMB8
	NFIA	WISP2	CALU			CST3		RGS3					ITGA5			UFM1	TUBB	PDLIM4	RPL37A	SYNPO2																									HLA-C	PMP22	TMEM45A	FXYD5	TMEM30A
	NEDD9	ITM2B	ATF3			SAMD11		ACTC1					COL5A3			SLC16A7	ISYNA1	GEM	CIRBP	ATP5MC2																									PDE1A	CYGB	ARF4	HSPB11	NEGR1
	HMCN1	PLBD1	ANOS1			TWIST2		EPDR1					EIF4EBP1			YME1L1	EEF2	DHRS7	COX6B1	DBNDD2																									ACAN	RARRES3	PSAP	AHR	LRRN4CL
	SVEP1	SVEP1	PTGER3			AEBP1		CCDC69					NET1			CNN3	PABPC1	CD82	CAVIN1	FHL5																									PAG1	GLT8D2	TMED2	UQCR10	TMEM119
	PPP1CB	CADM3	NET1			CDO1		ACTN1					PDLIM4			A2M	EIF4A1	UGCG	TCEAL3	C1QTNF1																									ADCY3	DPM2	FAM3C	PLAU	BMP7
	COL6A6	RNF149	HLA-B			LSP1		DTNA					MARCKSL1			CTNNAL1	B2M	NNMT	HCFC1R1	CCDC3																									SLIT3	SSPN	ADAM12	CMIP	FBXO18
	DAAM1	TUBA1C	TPM1			IGFBP5		TUBA4A					PLK2			PTGS2	SNHG15	SNU13	RPL38	NDUFA4																									GNG11	KLRD1	PAPSS1	CTSD	SPON2
	SERPINB9	CYCS	NLGN4X			LPAR1		PPP1R3C					NXN			CRELD2	RPL10A	PKM	RPS18	SEPHS2																									HLA-A	DAB2	SH3BGRL3	CCL20	PLD3
	S1PR2	VEGFA	CTSB			PSAP		RBM24					NME1			SSR4	RASSF1	ISG20	COX7A1	CHSY1																									ITGA7	P3H3	COL5A2	TMEM258	GRN
	PTGIR	ANXA1	RGCC			ARL4C		SUN2					MAP4K4				CAMK2N1	GPX4	SELENOW	UQCRB																									RASL12	RUNX1T1	CFI	SH3BGRL3	EFEMP2
	HSPB6	TFPI2	SUGCT			CPXM1		PHLDB2					RAB13				ATF4	ISCU	ITGB1	RPS26																									P3H2	MARCKS	RNF144A	CD44	PCSK6
	CALM2	RBMS1	TUBB2A			TMEM45A		PRKCDBP					LRRC15				MALAT1	HMGA1	RPL18A	JUND																									EPB41L1	NME4	MMP14	COL6A1	ABCC4
	ELN	SFRP2	ZFHX4			COL1A1		RSL24D1					SMYD3				RPS6	PRDX1	RPS9	ROCK1																									PEAK1	DCN	PLS3	ATP6V0E1	SERTAD4-AS1
	PIEZO2	FKBP1A	WISP2			LOXL1		PPP1CB					ARPC3				SEPTIN7	CEBPB	KRT18	PTMA																									OSTF1	GOLIM4	ELN	NGFRAP1	ECE1
	ADAM9	NOLC1	TSC22D3			C7		FLNC					C1QTNF6				NRP1	HGF	NFIA	SYNE2																									CYGB	TSKU	P3H4	CCDC85B	HACD4
	IL6ST	CDC42EP2	CXCL2			BHMT2		MKNK2					P3H4				STOM	SELENOS	ZNF331	CAVIN3																									CCR10	YBX3	KRT19	SQRDL	CASP1
	IL16	CXCL12	TUBB			ANXA2		TMEM160					GPC6				RPL6	PDIA3	MTHFD2	STARD13																									SLCO3A1	IRS1	CCPG1	NDUFA11	DACH1
	RASSF2	TNFRSF12A	TSPYL2			STRA6		ID4					NAA10				CYB5R3	PRMT1	RPL32	GPR4																									SOCS2	GPX4	IGHG1	PRRX1	MYO10
	SPON1	FGF7	GJA1			NPC2		SDC4					DYNLT1				RPS14	S100A6	MT-CYB	TMOD1																									ADA	LOXL1	GJA1	PRELID1	SSR4
	ITPR1	SFPQ	SORBS3			UCHL1		RHOD					FHL3				CRIP1	HLA-A	MZT2B	ALDH3A2																									IFIT3	TAX1BP3	MT-ND4L	RPS21	LAMB1
	SDHD	SRSF5	EDNRA			IL33		NT5DC3					PODNL1				RPL31	RNASEK	RPL30	TSC22D3																									ACTA2	BASP1	ANXA4	KDELR1	PODN
	GSTM5	STOM	ISLR			ADH1B		RALY					CNN1				RBM3	PAM	PTMS	ADCY3																									LINGO1	LUZP1	FKBP7	HAS2	OAF
	NDRG2	RAN	TRIM59			CLU		C15orf52					PPP1R14B				HES1	SSR3	ATP5MG	POMP																									ECM2	HSD3B7	UBE2E2	UPP1	NID1
	ABCA8	CNBP	COMP			COL5A1		SVIP					CILP2				RPS16	MYDGF	ELOC	SLC38A1																									GPX3	MEG3	MTRNR2L8	PSME2	POMP
	ZBTB16	HSPB8	GPC1			SMAD9		SYBU					BASP1				MYH9	DUSP5	RPL7A	MLLT11																									REM1	AHNAK	RIN2	EIF4EBP1	CTDSPL
	PPM1K	PSAP	FOSB			HMCN1		CDS2					BMP1				RPL39	COL6A2	RPL9	NOTCH3																									TRPC6	ISOC2	NTM	GYPC	PSMB9
	SCGB3A1	PROS1	CNN3			SGCD		RASSF3					RAI14				EEF1G	SOD3	RPS12	EIF4B																									PRKCDBP	RRBP1	PFN2	UBA52	TXNIP
	TSC22D3	PCBP2	SKIL			ALDH1A1		ENTPD1					GTF3C6				RPL14	FCGRT	SNHG5	PPP1R12A																									GRK5	S100A6	SUMO3	ATP6V0B	C9orf3
	UACA	STEAP2	EEF1A1			PDGFRL		RP11-983P16.4					FARP1				RPL18	CSGALNACT2	MT-ND2	ISYNA1																									SMARCB1	ANXA5	CALU	APRT	SPTBN1
	LSAMP	GPX3	CRISPLD1			MFAP4		PLXNB1					CD276				RPL27	SMS	CD99	DYNLT3																									THY1	IL15RA	CRABP2	RABAC1	RRBP1
	PRDM6	CLEC3B	TAGLN			SCN7A		SORT1					LAYN				FOXC2	LMAN1	ATP5MD	ITPKB																									INAFM1	SLC39A13	STX7	LDHA	MPHOSPH6
	SLC1A5	ADD3	NUAK1			SDC3		MFGE8					IKBIP				RPL12	RELB	RPL19	KIAA0040																									ANXA6	HSBP1L1	PYCR1	TNFAIP3	PTGS1
	FXYD6	PLAUR	C1QTNF6			HTRA1		PHLDA2					TWIST1				PDE3A	CLEC11A	RPL13	CRIP2																									SGIP1	BPGM	VAT1	TTYH3	MAN2A1
	CELF2	ARC	FBXO32			NNMT		FXYD1					IL7R				CD151	BTG3	RPL14	ARPC1A																									FAM213A	APOL1	MEG3	SLC38A5	CTSK
	KAZN	VAT1	CDKN2A			TIMP2		CCNI					BCAT1				ESAM	CHMP4B	RPS15	NFIL3																									INPP4B	JTB	SPINT2	TREM1	KIAA1755
	MEOX2	SRSF7	TNFAIP3			RCN3		RBPMS2					EGR2				RPS15	GLRX	MSRB3	ZEB2																									ADAMTS9	NPC2	FAM229B	HLA-B	FILIP1L
	VSTM4	PDLIM4	PDLIM5			RNF217		PPP1R12B					PLIN3				RPL17	KCNK1	ATP5ME	AKAP13																									LZTS1	TMEM126B	HSD17B6	GLRX	MAN1C1
	LURAP1L	TGFBR2	BST2			PDLIM4		SLC7A2					TMEM208				H3F3B	RUNX1	RPS4Y1	TOB1																									UTRN	PRR5L	PLAT	RGS3	PLPP1
	PTGER4	ABL2	CD9			CTSH		SVIL					LRRC32				PDE8A	PDCD5	RPL11	MT-CO3																									RSU1	FSTL1	VGLL4	DCBLD1	IL6ST
	CD81	FBLN2	VGLL4			F3		ZBTB16					SHC1					TXNRD1	EEF1B2	EEF1B2																									COL5A3	FASTK	ARL2BP	GFPT2	SQRDL
	MYO10	FSTL3	ANTXR1			CCDC109B		MAOB					TSPAN5					VEGFA	CLK1	MKNK2																									FBLIM1	DCBLD1	MGP	GNAI1	ADGRL3
	PLAC9	FBN1	CSRNP1			GPX8		DUSP22					GPX7					RAB18	TMEM176B	CD46																									RAC1	RALA	LINC01116	MSX2	LGALS3BP
	ITM2B	HMGA1	MYL9			RDH10		TSC22D1					SULF2					LGALS3	PLSCR1	AOPEP																									MYLK	SERTAD4-AS1	IGFBP6	ATP5I	COL4A1
	ARRDC3	EIF5A	KIF26B			FST		TOMM7					PLEKHO1					RAMP1	RPL35	BCAS2																									GAMT	MAF	GPC1	RPL27	FAM92A1
	NUCKS1	ATP13A3	EPHA3			NR2F1		ADGRL3					P4HA3					TPBG	RPL6	MT-ND1																									NRP1	MEIS2	FXYD6	COL15A1	CASP4
	PHACTR2	HSPA9	RGS2			TIMP1		C16orf45					EIF4E2					TRAM1	UQCR11	CHORDC1																									GSN	UROS	PTK7	RPL35	CEBPD
	RNASE4	DIMT1	HS3ST3A1			POSTN		TWSG1					CHST11					HEXB	RPS6	SNCG																									DAAM2	TTC3	NFYB	INHBA	ECHDC2
	CDO1	KDM6B	RAI14			DNAJC11		BCAS4					TDO2					RAP1B	RBM3	DNAJB4																									MFGE8	TCF21	YWHAQ	BID	PDZD2
	DCN	ESYT2	IFI27			PTN		GPC6					SUGCT					PSME2	ANXA6	RPS28																									RGS16	VAT1	SPATS2L	GLIS3	NRG1
	ZEB2	YWHAG	DNAJA1			FIBIN		HOXB2					PRDM1					TPI1	RPL41	PNRC1																									RNF5	DNM1	AC090498.1	MINOS1	FOXL1
	KCTD12	APOD	GPX7			THSD4		CKB					PHLDA2					ATP6V1F	BTF3	HNRNPM																									SPTBN1	TSHZ2	SCUBE2	SERINC2	NGFRAP1
	CKB	AMD1	FTSJ1			CYBRD1		PDE4DIP					RUNX2					MEG3	PTMA	FRMD4A																									TESC	GABARAP	MDK	TBCA	ACTG2
	SULT1A1	RANBP2	PPIC			GPC3		ARPC1B					EVA1A					LRP1	EIF3K	PAPOLA																									PELO	C1S	HTRA3	SNAI2	SOCS3
	ROCK2	RSL1D1	EIF4A3			SUGCT		SNHG12					SEZ6L2					PKIG	RPS27	TLE1																									UBA2	PRAF2	NUPR1	SCG5	GTF2I
	ITGA1	ETF1	ACTA2			TMEM176B		CLIC4					TMEM54					INHBA	NDUFB8	NDUFA5																									TAGLN2	CISD1	RPL17	UBE2S	ENHO
	CYB5R3	FLNC	RNF144A			MYH10		MAP7D3					EPS8					C1R	RPLP2	PDGFA																									ARID5A	STX5	ITGB5	NAA38	NES
	CEBPD	CPXM2	MICAL2			SBDS		CHMP4B					ENTPD1					PRNP	CALM3	CLMN																									SLC25A3	DKK3	CETN2	SLC25A37	TAPBP
	VGLL3	ABCA9	NFKBIZ			NFIX		ANAPC16					SPECC1					OSBPL8	RPL26	RPL36AL																									NFASC	PREB	PPFIBP1	HM13	FCGRT
	FOXF2	TUBB2A	HERPUD1			NOVA1		VPS13D					LEF1					RCN3	RPS8	CDKN2C																									RNF152	MRPS6	TMEM160	IFNGR1	ACVRL1
	TNFSF13B	POLR1C	P4HA1			SVEP1		MRVI1					COL7A1					RBM8A	VPS29	FOXC1																									CAMK2N1	ADAM19	IGFBP5	STEAP2	LIMS1
	SH3D19	PTX3	MSRB3			ANXA1		NDNF					SERINC2					NAP1L1	SMDT1	RPL41																									HLA-B	LAP3	CAPG	PDIA4	NKX2-3
	SYNE1	SLC43A3	SMYD3			MAN1A1		SEPW1					ENC1					FOSL1	COX5B	EEF2																									PRKAR1A	LRP1	MUC13	FKBP2	PRNP
	APCDD1	TOP1	GLA			ITGA11		GMDS					PLN					RAB34	OSMR	STARD7																									VIM	PPP1CC	TFF2	NDUFV2	HGF
	ANXA6	CELF2	PFN2			DCLK1		GJA5					CREB3L1					BNIP3		RBM7																									ARHGEF12	FAM89B	LRP1	LIMK2	LTBP2
	COL8A1	GNPNAT1	RHOA			PRELP		TOB2					TENM4					PLA2G4A		SLC25A6																									ARHGAP26	CST1	ARF5	C1orf122	GULP1
	SCARB2	AKR1C2	CILP2			CREBZF		THRA					MRVI1					EGFR		ZNF141																									CD36	IGHA1	CNN2	RGS2	EFCC1
	PKN2	ELL2	SYTL2			MPZL1		GMPR					BCAR1					DNAJC3		STK38L																									CALD1	SLC6A6	ITM2B	SDC4	ADAMDEC1
	ST3GAL4	TUBA1B	LMCD1			PCDH9		CD151					GPC1					RNF181		EPC1																									MYL9	C3	COL16A1	IL1R1	TFPI
	ENG	ARPC5L	SEPT11			NTM		CD164					DYRK2					ARPC2		HEYL																									NDRG2	SAMD11	CLIC4	UBE2D3	TNFSF11
	SMPDL3A	SPTBN1	SPHK1			TNFSF10		MYOM1					EVI2A					ARF4		PRKG1																									CPE	HDGF	TRIL	CD68	MEG3
	MGLL	BIN1	CDKN1A			MLLT4		FADS3					GPR68					INSIG1		COX14																									KLHDC8B	SGCB	KDELR3	CBX3	ITM2C
	HGF	HNRNPF	PQLC3			SERPINE2		TEAD3					HAPLN3					TSHZ2		COX7A2																									TGFB1I1	C7orf73	PCDH7	SH3PXD2B	ATP9A
	SLC38A2	LARP4	OLFML2B			TMEM176A		LDB3					TES					JAK1		RPL36A																									COX7A2	ZEB1	BORCS7	NRP1	GCLC
	ZBTB20	CD55	TPM4			DNM3OS		CDH13					DSG2					PFDN2		OAZ2																									POMP	C17orf62	SNX7	SNRPE	FAM65C
	LMCD1	NFIB	CD276			CHPF		CAP2					C4orf48					TGIF1		SCAND1																									TACC1	ID1	CSDE1	NNMT	GDE1
	HOXA3	SEMA3B	KDELR3			G0S2		GLUL					GGCT					SURF4		PRMT9																									ANKRD10	FIBIN	LMO7	POLR2L	KCNK6
	HMGN3	YWHAZ	OLFML3			CERCAM		ARPC1A					NID2					RGS10		TINAGL1																									MYH11	LAMTOR4	FKBP9	SSR4	CIB2
	LIFR	ABCC9	SUMO3			FAM198B		CSDE1										SRSF9		NTRK2																									TRIB2	S100A13	CKAP4	CCL3L3	VEGFA
	PEAK1	BCCIP	HOXB2			MMP14		LDHA										ECM1		ESYT2																									ENTPD1	MRPL23	COL8A2	BIN1	CAV1
	SERINC1	SELENBP1	UBE2V1			MATN2		ETS2										ADM		PDZRN3																									S1PR3	SYNDIG1	BNC2	STC1	LINC01082
	SPRY1	DDX5	PDK3			NUMBL		URB1										YWHAB		MT-ATP6																									SNX6	MITF	CTSB	BCL2A1	AKIP1
	MATR3	SPRY2	XBP1			PCSK5		MPDZ										ENO1		RPS6																									UBE2A	CDC25B	CYP1B1	CHIC2	MOXD1
	FXYD1	SULT1A1	BTG2			COL15A1		DGKG										RCN1																											HIP1	FKBP9	FZD1	COX7A2	SVIL
	TMEM9	BRIX1	COX16			NAV1		NPY1R										CALU																											LINC01197	AGTRAP	CES1	SDK1	FBXO21
	PEMT	PTGDS	HSPA5			CDC42EP3		RPLP1										FNDC3A																											PLXND1	STAT2	GLO1	HMGA1	COL5A1
	CBX6	GFRA1	BACE2			PPP3CA		SPRYD3										DHRSX																											RASSF1	PDGFC	ARL2	NDUFB11	SPRY4
	KANK2	CCND2	NRP2			BMP4		AMD1										RTN4																											TBX2-AS1	TAPBP	CYBRD1	ANXA5	BDKRB2
	PTPRD	SGK1	PTTG1IP			HSPA6		NR4A3										EFEMP1																											STEAP4	IGFBP5	CEACAM5	SLIRP	LGALS9
	LAMB1	FAM180A	PRELP			SULF1		FAU										SERPINF1																											IL34	RCN3	TMEM98	RPS19BP1	MFGE8
	FNIP1	PHGDH	TIMP3			ITM2B		CFL2										GABARAPL2																											RBPMS	MMP1	TIMP3	CISD2	GSTM3
	EPAS1	SF1	SLC44A1			GSTM5		OSER1										DNAJB9																											HEY2	RARRES1	CNIH1	PSMB9	CALM1
	ID2	NXT1	TPBG			HPS5		PDLIM7										DAB2																											CYSTM1	TSPAN8	SDC2	WISP1	JCHAIN
	OLFML3	NIFK	SSPN			RORB		SAV1										SPG21																											MAPRE2	TMEM208	ITGB1	RPL36	EPB41L2
	PALLD	GABARAP	DNAJA4			KCTD12		ELL2										LAMP2																											LAMC1	AUP1	LGALS1	RPS3	CHCHD10
	DNAJC3	RAMP2	TNFAIP6			CTGF		NDUFAF2										SSPN																											ARPC3	BRD4	MAN1B1	MSC	SAMD11
	LAPTM4A	CCT2	HSP90AB1			DIO3OS		SYPL1										ARL6IP1																											MYL12A	HSPG2	MICU1	CCL4L2	ARHGAP18
	STAT2	FGFR1	SPON1			CES1		MTHFD2										PERP																											IFITM3	COL5A2	BHLHE41	ZFP36L1	NCAM1
	NAPA	RFK	DIO2			PRNP		SCUBE3										CKS1B																											HLA-F	PRMT2	SGMS2	TMEM205	FKBP10
	NFIX	EIF4A1	FOXP1			HSPG2		RBPMS										SKP1																											TDO2	FSCN1	MBOAT2	SMIM3	PLEKHH2
	MAF	PNO1	TMED2			S100A11		TMEM47										LGALS3BP																											SYF2	PYCR1	TMEM43	USMG5	IGHA1
	TMEM47	DNMBP	NGRN			SMARCA2		SLMAP										ACSL4																											CTD-3193K9.4	CCL11	MSRB3	MT1G	PRDX2
	TGFBR3	CTNNAL1	P3H1			TSKU		ATP10A										FGFR1																											ISG15	APH1A	TAGLN	SMOX	C8orf4
	COL15A1	ARHGAP10	ITGB5			C14orf132		MYO9A										ATP6V0C																											IFITM1	TWIST2	GDI2	TNIP1	PDIA6
	ARHGDIB	DDX27	DAP			SSPN		EIF4B										ARPC5																											ARHGEF7	PDLIM4	PRCP	C16orf13	SVEP1
	LGMN	BTG3	P4HA3			LXN		NFKBIZ										PPIB																											EIF3K	LGALS3	MMP13	MT-ND4L	SDC2
	TANC1	BZW1	IDS			COL6A2		TMBIM1										UBE2I																											ITGB1	GLMP	RAB31	RIN2	FAT4
	RGL1	BST1	GGT5			IL15RA		RP11-195F19.5										KDELR2																											MAP2K1	ERAP2	PODNL1	RPL38	IL7R
	SMARCD2	ADAMTS1	TUBA1C			IL1R1		PPP1R12A										TMED10																											AC013461.1	EFEMP2	DSG2	SQSTM1	PPP3CA
	PSAP	GRPEL1	GPX8			PLD3		GPRC5C										SERP1																											MPRIP	SSNA1	CST7	COX6B1	AMPD3
	HSD17B12	DDX24	SH3BGRL			CDH11		FAM107B										CDH11																											ADGRA2	WNT2B	KRTCAP2	LTBP1	GUK1
	SESN3	PTP4A1	ELL2			PCOLCE		CNKSR3										GLIS3																											TRPV2	COL10A1	TMEM230	DBI	GLRX5
	ZMIZ1	BDKRB1	MARCKSL1			DHRS3		ZFAND5										SRM																											KLF9	NREP	PLA2G16	NQO1	SCAND1
	OLFML1	PSMA6	ADAMTS12			SRPX		TMOD1										CFH																											P2RY14	C1QTNF6	FST	SGK1	NUDT3
	AIG1	IGSF10	EDIL3			NBL1		RPS27										MAP2K1																											TMEM165	RFTN1	MTRNR2L12	CHCHD2	ROBO2
	CCDC102B	GNL3	LUM			SLC1A4		CAPZA2										HLA-C																											PTMA	PRKCDBP	LYZ	MAP3K5	IGHA2
	SMARCA2	DNTTIP2	P3H4			PAM		TMEM38B										GJA1																											SYDE1	ARL6IP5	DPT	TIMM13	RBPMS
	GSTK1	ZNF800	TENM3			IGFBP4		MOB2										LHFPL2																											NDUFS6	ARL6IP4	INHBA	TBX3	LAMTOR2
	ATRAID	PID1	PMAIP1			LGALS3		DIXDC1										CYBA																											SYNE2	ENTPD1	GLT8D1	COL12A1	ENG
	GNAI1	MTHFD2	ACTN1			SEC24D		TBC1D1										NFKBIZ																											HSPB2	MARVELD1	RHOD	BCAT1	PXDN
	RORA	CCDC47	VIM			LY6E		CYB5R3										AMPD3																											FILIP1	PMVK	SH3BGRL	P4HA1	TM4SF1
	TLN1	NT5E	SERTAD1			RNASET2		CPEB4										PSAP																											CALM3	MAP2K2	ZNF83	CSTA	CSF1
	44446	NR4A1	FAM3C			NBEAL1		NXPH3										RNF24																											PDE5A	UQCR11	TMED10	PGAM1	ADAMTS7
	KCNS3	IPO7	FAM198B			CLEC11A		HIST2H2BE										BIRC3																											PLEKHG2	REEP5	NRP2	BASP1	QKI
	INSR	PNRC1	MMP2			PRSS23		KIF1C										SNX9																											TNS3	DRAP1	AHNAK2	SRGN	FARP1
	MEIS1	XBP1	TCF12			ADD3		MRGPRF										BZW1																											SORT1	CDKN2B	OCIAD2	RPLP0	SOBP
	ROBO1	SNHG15	PTP4A1			NDRG1		EIF4A2										TNFAIP6																											RAP1B	ARAP1	LRRC17	C4orf48	FAM19A5
	CD46	EIF4A3	RHOB			KLF5		SUN1																																					CLMN	ISCU	CCND2	SMAD7	THBD
	PRNP	OSMR	KDELR2					PDK4																																					NDUFS7	MLXIP	GALNS	TMEM256	PTS
	GLG1	SERBP1	SCARF2					MRPL33																																					RP11-175K6.1	KLF6	DAP	MYDGF	PPP1CA
	FOXO3	G3BP1	BMP1					DAPK3																																					ZEB2	TIMP3	NPDC1	CHST15	STK24
	USP22	PLA2G5	LEF1					TPM1																																					LAMA4	IAH1	FAM63B	TSC22D1	TMEM123
	SAMHD1	USP53	FKBP7					ITGA3																																					ISG20	CNPY4	MIAT	GBE1	MMD
	MMP23B	SDCBP	JUN					CD46																																					CD44	PSMG3	MT1F	RCAN1	HSBP1L1
	CAT	EMD	NTM					NEXN																																					FKBP4	BMP4	FSTL1	LYZ	AGPAT2
	SLC44A2	BCHE	SERTAD4-AS1					APLP2																																					IL17B	CASC4	NKD2	PSMB10	SNTB1
	GADD45G	TUBB4B	SPATS2L					RPL37A																																					LYPD1	TRAM1	SEMA3C	TWIST1	PPP1CC
	KAT6B	LINC01133	IL32					SPOP																																					SASH1	GSTT2B	LTBP3	SNRPD1	MUC12
	PCDHGC3	EEF1G	CTGF					PTRF																																					CALHM2	COLGALT1	VKORC1	UBALD2	ADAM19
	EEF1G	PLXDC1	HOTAIRM1					TMEM123																																					PLCE1	TCIRG1	DUT	ICAM1	GPC1
	RUNX1T1	ABHD5	CLIC4					TTLL7																																					NDUFS2	TNFRSF14	WIPF1	RPS26	SALL1
	TMBIM1	PXN	TDRP					C1QTNF1																																					SH3KBP1	CKLF	GPX4	SNHG25	ACP1
	ZFHX3	KLF3	CXCL3					CAMTA1																																					WFDC1	TMEM263	COL5A1	PSMA2	ATPIF1
	LAMA4	SRGAP1	TUBA1A					POLR2K																																					PARM1	FKBP11	ALDH1A1	PHLDA2	CDS2
	ANGPTL1	ZYX	PRRX1					ZFHX3																																					COBLL1	TTYH3	RHOA	FAM65C	ISLR
	POLR2A	PRDX6	PEA15					JPH2																																					PPP1CA	HLA-E	DCBLD1	PRDX4	PARP1
	THRAP3	HTRA3	TCF4					NDFIP1																																					CYBA	SDF4	FAM198B	CTSL	IGF2
	DHRS3	HSPD1	PLOD1					YWHAQ																																					NPNT	FAM20C	TCF4	PDE4DIP	ADGRE2
	NR2F1-AS1	CD44	PTPN14					INPP5A																																					MGLL	PIGR	SULF2	PI3	WNT2B
	GYPC	COTL1	BHLHE40					PBXIP1																																					PAMR1	FAM19A1	TMED9	UQCRC1	COCH
	CD59	KCTD20	MAFB					GABARAPL1																																					DMD	PRDM1	S100A6	SNRPD3	DIO2
	FRZB	USP36	TMEM119					MMADHC																																					SARS	SSC5D	UBL3	MT1M	HTRA3
	CYP20A1	SLC4A7	MITF					MYO1D																																					IK	MICALL2	SEC24D	MRPL41	TMEM204
	DYNC2LI1	NABP1	NXN					NXF1																																					SH3BGRL	NTAN1	COPZ2	HMOX1	PARK7
	TPCN1	CLCF1	SPOCK1					ITGA5																																					COX7B	ARL2BP	WISP2	NRP2	C1R
	GABARAP	NIP7	HOXB5					PPP4R3B																																					MYC	TP53TG1	NDUFA13	IL32	HIPK2
	C1RL	MIR22HG	C1QTNF7					TNC																																					TLE1	PLD3	PTHLH	MRPL17	WLS
	TBC1D2B	EIF2S1	ANXA2					NRGN																																					CAMK1	TARSL2	OSBPL9	AGTRAP	IGFBP5
	RHBDD2	AKIRIN1	ARL4C					MFHAS1																																					NID2	EVA1B	ANXA1	GJA1	PHPT1
	MAST4	SPTSSA	PARVA					SGCA																																					UBE2E1	FGD6	IGLC3	TMEM119	GDNF
	SUN2	UCK2	TPST2					SLC8A1																																					PHLDA1	DRAM1	PIGT	SERPINE1	PARP14
	DDX6	FBL	MORF4L2					SNRNP25																																					ARHGAP42	KRT10	LGALS4	COX7C	TXNL1
	CHPT1	MAPK1IP1L	GALNS					BARD1																																					COL14A1	FXYD6	SHISA2	MT-CO1	GRK5
	FAM13A	CRISPLD2	A1BG					FOXC2																																					SPTSSA	TAP1	ANXA2	RASD1	TSPAN4
	C16orf89	LRRC59	SNX7					TPD52L2																																					NCK2	ANOS1	CHID1	CCL2	CAPN7
	PER2	PCBP1	PLOD2					INTS6																																					NTN4	TRIM22	CARHSP1	TAGLN2	DHRS7
	RIN2	TSR1	ZEB1					DNAJC18																																					SUSD2	MAB21L2	PRSS23	NDUFV3	NDUFC2
	H6PD	HIF1A	CYR61					EFHD1																																					TNFAIP1	FBXO6	VAMP2	RPLP2	FAM150B
	TMEM245	CSNK1A1	RASD1					KALRN																																					SYTL2	C2	EMILIN1	SLC2A6	TAP1
	MDM4	FILIP1	MBOAT2					SAMD4A																																					CBR1	IGF2	RAB23	UQCC2	CTNNB1
	PLS3	LRP1	TMEM109					FBXO32																																					SEMA5A	VGLL4	P3H3	FADS1	TGFB1
	SLC35A1	GABARAPL1	PLK2					TIMP3																																					IFI27	P3H4	TMBIM4		IFI35
	BCL6	PXDC1	RHOD					PLS3																																					LDHB	LIMK1	CNIH3		LDHB
	STEAP2	ELOVL5	SEC13					RASL12																																					TRIP6	TMEM9B	CAPZB		COL4A6
	CYP27A1	SYNCRIP	HSPD1					MAPRE2																																					LGMN	MDFIC	CLU		STAT1
	EIF4EBP2	PHLDB1	SHISA4					DUSP3																																					RBX1	HSD17B14	SH3PXD2A		PRRC2C
	ANO6	SMOC2	CACYBP					FAM20C																																					SPRY4	FENDRR	YIF1A		PSME1
	SERINC5	PFDN2	FKBP10					OAT																																					GPAT2	OAF	ACTB		HS6ST2
	WASF2	ANK2	SFRP4					RNF150																																					44448	STRA6	ITM2C		LMAN2
	FILIP1	ANGPTL1	MYH9					ENAH																																					CD4	BGN	CCZ1		DLC1
	CDS2	S100A10	ALDH1B1					FOSL2																																					AGRN	TMEM243	HHIP		PMAIP1
	CALCOCO2	PDGFRL	TMEM263					GULP1																																					SEMA5B	BICC1	EIF4A2		LRP4
	AHR	DUSP6	MAGED2					CAV2																																					MOCS1	CTSA	PCNP		TTC3
	CPED1	TAGLN2	ZFP36L1					AK1																																					CCDC74A	TP53I3	COX7A2L		TOP1
	IRS2	ASS1	SLC39A13					COX20																																					ASPN	RGS3	RBM3		ZNF580
	DPT	CKB	LDOC1					EVA1C																																					SERPINB6	TSPAN4	SVIL		LAMTOR1
	RAP2B	SH3BP5	ROR2					PROSC																																					LOXL2	GABARAPL1	LAMP1		HMGN1
	CANX	CPXM1	TUBA1B					SHISA4																																					LRRFIP2	TADA3	CDKN2A
	DCXR	ARL4D	CLEC11A					COX7A2L																																					LAMB3	C1orf122	TMSB10
	TNRC6B	ITGA5	VAT1					AHNAK																																					ENG	BNC2	CASC4
	CYB5R1	STK40	ZC3H12A					TAF7																																					AXL	C11orf31	C4orf48
	LMO4	C1orf21	P4HB					A1BG																																					RP11-598F7.6	UBXN6	RARS2
	WSB1	AGO2	OSR2					ANGPTL1																																					SNCG	IGLC2	CAPN2
	TBL1XR1	TMEM70	RBM3					TUBB2A																																					RHOC	LRP10	CCNI
	MLXIP	FUS	SSR3					CITED2																																					TBC1D1	GPR137	CNTN1
	ALDH6A1	C1QBP	RPN1					PKM																																					CDC42BPA	CHMP1A	MGST3
	GLUL	SGCE	CHN1					AC013461.1																																					ARPC2	TMEM140	NENF
	COMT	RPF2	C11orf24					ACTN4																																					SAMHD1	AKR1B1	RNF187
	F10	DCAF13	DNAJB6					IGHMBP2																																					DPYSL2	EIF2AK2	UBE2E3
	SRGAP1	SRSF2	TGFB1I1					COX14																																					HIPK2	COPZ2	CXCL14
	ADAMTS1	EIF3A	AK1					IFRD1																																					LRRFIP1	TNS3	WBP1L
	TSPYL1	MAP2K3	PRDX4					KIF1B																																					LASP1	ERGIC2	ARL1
	CAV1	FGF2	ALDH18A1					RPS10																																					SSTR2	CNN2	CD24
	FMOD	APP	PDLIM7					UBE2H																																					ATP8B1	ANKH	TNFSF10
	CERS2	AHNAK	TM9SF1					GYG1																																					ATP5G3	GULP1	TMED3
	TMOD3	PEA15	CAPG					ILK																																					CORO1B	ACP5	ROR2
	C1QTNF7	HSP90AB1	ID4					SH3BGRL																																					ITGA3	PLPP4	CROCC
	TSPAN4	NUP153	TCEAL7					BCL6																																					TBCC	TMEM158	TSHZ2
	CYP7B1	CTSF	TOM1					HSDL2																																					SPRY1	PTK7	APH1A
	MSRB2	S100A4	ARL2BP					CHURC1																																					RAB6B	LXN	LAMB2
	CNN2	TFAM	AGAP2-AS1					COX17																																					PTEN	TNFSF13B	ALDH1B1
	ZNF302	MLLT11	MID1					HSF1																																					SSRP1	SHISA5	HMCN1
	GADD45A	IGFBP5	GLT8D1					IMPA1																																					RALY	ADAR	CYB5R3
	ECHDC2	GLIS3	CSRP2					PEG10																																					GLA	HACD4	TENM3
	LMBRD1	RIOK1	DYNLT3					TSPO																																					B2M	LAMTOR2	LRP10
	CDR1	ABL1	HOXA5					CALM3																																					DEK	COL3A1	NUAK1
	CAV2	FERMT2	SLC38A5					IPO7																																					TNS1	VTI1B	HHIP-AS1
	AES	SOAT1	SPG21					ETFB																																					MARCKSL1	TMEM204	TCEB2
	ZKSCAN1	NAF1	IFRD1					ARL2																																					AC133644.2	LINC00657	CANX
	OSBPL9	AKR1C3	BRD2					SNHG25																																					PCDH1	IFI35	APBB2
	TMEM59	NEGR1	ARMCX2					MBNL1																																					SOD1	UQCC2	MARVELD1
	SCPEP1	FAM126A	HSPE1					NR1H2																																					ARPC1A	YIPF3	NREP
	NR3C1	EIF4E	GDI1					YME1L1																																					LYSMD2	ABRACL	GAA
	PDS5B	NCALD	PAPSS1					PCSK7																																					RHOQ	CHD3	WDR83OS
	CITED2	ZPR1	ANGPTL2					LGI4																																					CD40	STARD10	ATXN1
	NDN	SRM	NDUFA12					IRF2BP2																																					LPL	CBX3	S100A14
	PDE4D	RNASE4	SNAI1					PDE5A																																					LIMS1	PYCARD	NDN
	MMP2	TNFRSF1A	RAB23					PALLD																																					HMGN3	IRF1	RUNX1T1
	GSTM3	SLBP	ADAM12					RPS25																																					PEAR1	SNED1	GALNT1
	AKAP9	METRNL	ZNF331																																										SLC7A5	HOXA10	BCAT1
	PAPSS2	BAIAP2	EIF2S3																																										RPS4Y1	SOX4	CLEC2B
	ZFP36L2	PIM1	EGFL6																																										ATP1B3	PKIG	GLG1
	FCGRT	GAS7	HES4																																										ROCK1	PARP14	MRPL23
	TOB1	ARL6IP1	PKM																																										CRISPLD2	MRPL41	RTN4
	LRP1	NUP98	SHISA5																																										FAT1	ACVRL1	LPP
	DDIT3	LHFPL2	TSPO																																										CYFIP2	MRAS	HNMT
	DAZAP2	RNPS1	HMGN4																																										FAM212B	RAB34	KDELR2
	MAN1A2	PNPLA8	VOPP1																																										ID3	REG1A	PPT1
	RECK	F10	STK17B																																										MOB4	SCARF2	MEOX2
	IFNGR1	GLUL	PMEPA1																																										RAP2A	DIO2	CDC42EP3
	CHP1	SLC25A32	PGK1																																										ABTB1	MRGPRF	EMC10
	ECM2	PPRC1	EGR2																																										LMNA	TMEM109	PDLIM2
	TMED4	BAZ1A	C18orf32																																										SMTN	EMILIN1	NHLRC3
	RAB8B	GSPT1	EGR3																																										PTPRA	COL27A1	MPC1
	DPYD	DHX15	SQSTM1																																										PTP4A1	PTGER3	DSTN
	ITGBL1	PDE4D	YWHAZ																																										ILK	CDC26	HES1
	GYG1	PCYOX1	CTNNB1																																										C4orf32	GUCD1	ATP5E
	44261	PAICS	TUBB2B																																										MYH9	GDE1	ENPP1
	PER1	MEST	COPS8																																										COX8A	LEPROTL1	MED30
	NEXN	SNU13	SLC12A8																																										MAF1	COL11A1	CADM1
	TMTC3	AFG3L2	NFKBIA																																										YPEL2	APOL2	PDLIM7
	MDFI	ST3GAL1	GLMP																																										PRKG1	TP53I13	GLI3
	SLC39A1	IFITM2	TUSC3																																										PTPRE	MYO1E	IGF2
	ECH1	INSIG1	SMOC2																																										SH2B3	KXD1
	LIMS1	PHF20	IFT52																																										FXYD1	CXXC5
	SMIM14	ANXA2	NEK6																																										FJX1	AHNAK2
	DUSP6	PPTC7	TUBB4B																																										SLN	IGF2BP2
	MXRA7	INPP1	KIFAP3																																										COX4I1	SERTAD4
	AKAP12	UBE2N	ACTG1																																										SKA2	LSM10
	LPAR1	B4GALT1	DUSP10																																										OPTN	PFDN4
	SMARCC2	TSHZ2	CXorf40B																																										HTATIP2	COX7A1
	CDC42	PAK1IP1	CHST14																																										NDUFA12	ZNF706
	EPM2AIP1	YBX3	TOB1																																										PPIA	EXT1
	LRPAP1	SNED1	ZNF503																																										TKT	FGFR1
	EGFL6	HSPE1	GAPDH																																										CHSY1	MGAT1
	PLEKHA5	TRMT10C	TES																																										AFAP1L2	CMIP
	GAS7	CCT5	C1orf198																																										KCNMB1	KRTCAP2
	SECISBP2L	RTN3	RERG																																										ATP5F1	RGCC
	CBR1	NFIL3	PCSK5																																										BST2	FUOM
	TTC19	TUBB3	SNAI2																																										LIPA	WWTR1
	TCF4	STRAP	CD68																																										VPS29	KIAA1755
	MARCKS	ZSWIM6	CPZ																																										BCAM	TBC1D16
	HNRNPH1	ADAM33	NR4A3																																										TLN1	FKBP10
	CPNE3	MAP1B	POSTN																																										FRMD4A	MYEOV2
	PLSCR4	GNL2	IER2																																										RAPGEF2	IFI44
	IRF2BP2	SMG1	CAMTA2																																										MSN	C12orf75
	C1S	USP10	H3F3B																																										CARMN	VEGFB
	ANTXR1	DKC1	IER5																																										CHST2	DNAJB1
	CCDC47	GPCPD1	ZFP36																																										MFSD10	CDK2AP2
	CRIP2	CD302	IFFO1																																										TMEM47	GPX7
	NOTCH2	ADAMTSL4	H1F0																																										BBX	BHLHE40
	RNF13	MPZL1	VCAN																																										BATF3	SPIN1
	NGRN	KPNA2	SLC39A14																																										ANKRD28	WDR45B
	KLHL24	SMAD3	MARVELD1																																										GYG1	LY96
	POR	MIF	CCND1																																										PDE8B	PET100
	THUMPD1	ZC3H11A	H2AFX																																										ASAP1	RPS26
	TERF2IP	NRIP1	MAFF																																										PRKAR1B	VEZT
	FGD5-AS1	KAZN	CALD1																																										RCAN2	SLC35B2
	PRKG1	GPATCH4	KCNE4																																										KLHL23	GGCT
	SGCD	ABCF2	CRYAB																																										MRPS18B	MXRA7
	NPC2	CCT3	UNC5B																																										CTNNA1	HEBP2
	DDX17	CAMK1	SMAD1																																										TSPAN12	GOLT1B
	SERINC3	DNAJC2	ZBTB21																																										TEX41	HLA-DRB1
	GNPTG	FAM208B	RCAN2																																										PXDN	CXCL14
		FSTL1	RCN1																																										RRAS	NKX2-3
		PRRC2C	HSPA2																																										MAGED2	NR2F1
		AHCTF1	VCAM1																																										PVRL2	AGT
		GCLM	ILK																																										DSTN	TMEM222
		CLIP1	KLF6																																										TRPC4	TMEM183A
		ACKR3	PML																																										GBGT1	HSPH1
		SCAF4	COLGALT1																																										EBF2	PRRX1
		TFRC	UBTD1																																										FHL5	MINOS1
		GTPBP4	MAPRE2																																										HAAO	IER3IP1
		CSNK1D	GOPC																																										COX5B	AZIN1
		PRDX3	EFEMP2																																										LIMD2	MBD2
		BAG1	GLUL																																										HNRNPK	AKR7A2
		SRSF1	RGS3																																										HOXB-AS1	PMEPA1
		MRTO4	SRPX2																																										BUB3	ERLEC1
		HSPA14	CH25H																																										ST6GALNAC6	YKT6
		DDX18	IRS2																																										YWHAZ	LEF1
		SNX9	SLC16A3																																										PFKP	SCARB2
		VASN	KLF10																																										CD163L1	STMN3
		USP12	SNHG18																																										ALDOA	CCDC85B
		HRH1	UBQLN2																																										NCKAP5	SUMO3
		RAD23B	PABPC1																																										DYNC1I2	CFD
		EXOSC4	TMEM200A																																										CSNK1E	SLC35C2
		RNF13	SULF2																																										PMEPA1	PITX1
		ZFAND5	FKBP9																																										SBDS	CTD-2336O2.1
		UGP2	PLK3																																										PPM1G	FAM114A1
		GART	PCOLCE																																										ATP5G2	LOX
		TUBB2B	HAPLN3																																										HOPX	STEAP1
		EPB41L3	JMJD6																																										PPP1R12B	ANXA4
		ACLY	ERN1																																										NCOA7	SMIM19
		PRDX1	ITPRIP																																										MTUS1	PLBD2
		SLC2A3	JUNB																																										ZFHX3	FAM102A
		TIPARP	IER3																																										FHOD1	DTD1
		DNAJB9	CTSZ																																										PPA1	RND3
		FCGRT	IFI6																																										CDH13	CHST12
		NAA50	BCAS2																																										ATP1A1	CLNS1A
		LDLR	FKBP4																																										HPRT1	HES1
		CAB39L	SYAP1																																										FHL3	ATP5J2
		AHR	RIN2																																										VDAC2	SRM
		SLC25A33																																											TRAK1	ZFAND2A
		GNG11																																											NUDT4	C19orf60
		SLC25A5																																											GNB2	NECAP2
		SNRPD1																																											MAP1LC3A	EFNB2
		EIF1																																											YWHAH	CARD16
		SPAG9																																											NREP	PLPP5
		FBLN5																																											GSTK1	MAGED1
		SLC25A4																																											LAMB2
		TIMM23																																											YWHAB
		EIF1AX																																											GPRC5C
		PSMD12																																											SDPR
		TGS1																																											CYCS
		SEH1L																																											RFXANK
		RBM4																																											BAZ2A
		ACTG1																																											NAPA
		NAA15																																											DKK3
		PFKP																																											NFATC4
		FHL1																																											FKBP8
		PGD																																											PLEKHA2
		FOSL2																																											CFL2
		MSX1																																											NDUFA1
		CCT6A																																											CCNDBP1
		NAPA																																											CALM1
		EPHX1																																											LIN7A
		TOMM40																																											RAN
		NOP2																																											UGCG
		RHOQ																																											ARHGAP24
		NOP56																																											PDE1C
		PPIA																																											ATP5D
		SLC16A1																																											WDR1
		DDOST																																											DPY19L2
		AKIRIN2																																											POPDC2
		ZNF385A																																											RFTN1
		REXO2																																											AES
		RNH1																																											ANP32A
		DNAJA2																																											HSPA2
		TXLNG																																											MAFK
		PTPRS																																											ASAP2
		LXN																																											DNAJA2
		SMIM14																																											TUSC3
		DAB2																																											USMG5
		CAPN2																																											PTRF
		CCNH																																											C8orf4
		LTBP4																																											PSME1
		TRIOBP																																											GPM6B
		SAMHD1																																											MIR497HG
		BDKRB2																																											ANXA11
		GYPC																																											ADGRE5
		TCN2																																											SMIM12
		LYAR																																											NDUFA6
		RRP1																																											CREM
		STK17A																																											COMMD8
		SLC3A2																																											CYTH2
		HMOX1																																											TSC22D4
		ENO1																																											KALRN
		HNRNPU																																											RHBDL2
		SERTAD2																																											TMEM204
		ZFP36L2																																											PDE8A
		MAP3K8																																											CNST
		PAK2																																											IFIT2
		F3																																											BAZ1A
		SPTAN1																																											POR
		RBM25																																											FRMD3
		BZW2																																											PACSIN2
		ABCE1																																											PHACTR2
		TPM3																																											RBBP7
		XRCC6																																											ITGA4
		SDHD																																											ROCK2
		CCT4																																											GPSM3
		EIF4G1																																											PLCL1
		CALHM2																																											HNRNPF
		CD74																																											GNAI3
		TRIO																																											ARF3
		HLA-DRB1																																											CYB5R3
		STX12																																											CCT5
		ILF2																																											AOC3
		FZD4																																											PDE3A
		SLFN11																																											SMAP2
		GRWD1																																											JAK1
		UBAP1																																											ACTN4
		DOK5																																											CLTA
		CCT8																																											CYC1
		SBDS																																											LARP7
		USP15																																											ARHGDIA
		SERPINE1																																											SLC44A2
		HSD3B7																																											44450
		PLSCR4																																											PA2G4
		SNRPB																																											SEMA4C
		LGALS3																																											NDUFB3
		ITIH5																																											VDAC3
		IFI16																																											XRCC5
		YWHAB																																											SELT
		YTHDF2																																											KRT18
		CLINT1																																											PSMA5
		CDK17																																											RILPL2
		WDR74																																											RP3-395M20.12
		PLSCR1																																											BRK1
		KLF4																																											COX5A
		CLDND1																																											TPGS1
		EVA1C																																											SLC7A2
		RBM39																																											FEZ1
		NPM1																																											FBLN7
		ANXA5																																											RERG
		ZC3H15																																											TNS2
		DHRS3																																											NDUFB1
		TRIP10																																											RNF135
		SRGN																																											CNN3
		IL1R1																																											USP16
		ALDOA																																											F2R
		RTN4																																											SNRK
		JMJD1C																																											DENND2A
		HNRNPDL																																											KNOP1
		APLP2																																											COMMD7
		SCML1																																											NFIA
		GATA6																																											NOSIP
		HNRNPA2B1																																											COMT
		TWIST2																																											ARHGAP17
		NME1																																											DMPK
		TCP1																																											KPNA2
		MFSD1																																											PSMC3
		HIGD1A																																											CRK
		PITPNB																																											TES
		NDEL1																																											CPNE1
		UBE2D3																																											MRPL36
		EIF5																																											MVB12A
		HIPK3																																											RAB5C
		CLTB																																											CCL8
		SLC16A7																																											FAIM
		SFRP4																																											A1BG
		DHX36																																											ACAT1
		C1QTNF3																																											PRR16
		BNIP2																																											SLC2A3
		GTF2B																																											PSMD4
		GNB2																																											DOCK6
		RLF																																											NFU1
		EIF3M																																											NDUFB2
		HNRNPH3																																											SH3RF1
		NDRG1																																											CISD3
		SNX21																																											CCT8
		ZBTB16																																											PELI1
		ACADVL																																											ARID1A
		CFH																																											TSPAN3
		PLA2G16																																											C1orf21
		POLR1E																																											MZT2A
		PRCP																																											SMC4
		PIM3																																											COX6C
		NUFIP2																																											DNAJB4
		EMP1																																											CCT3
		ZDHHC9																																											RP11-879F14.2
		TNFAIP6																																											AP2M1
		CCNT1																																											RHOJ
		LAMB2																																											C1QTNF1
		SCPEP1																																											CHURC1
		IL11RA																																											BCL2L1
		ELF1																																											GAPDH
		CEBPD																																											SNHG15
		RRP15																																											HDAC5
		EBNA1BP2																																											SLC25A25
		STXBP1																																											TMEM108
		CDC42SE1																																											ZNHIT1
		YWHAE																																											MRPS5
		ARID5B																																											EIF2S2
		PHLDB2																																											RBMS3
		HSPA4																																											VASN
		TNRC6C																																											PSMB2
		NGDN																																											MKKS
		CCPG1																																											TSPAN14
		CENPW																																											ARHGAP44
		CRTAP																																											ITPR1
		FEM1C																																											TNIP1
		ADRM1																																											DOCK10
		DNAJA1																																											MLLT6
		SNRPA																																											MMP11
		KLHL21																																											LAP3
		ZFP36L1																																											S100A4
		MYO1E																																											ATP5C1
		APPL1																																											CDKN1B
		ACTB																																											CACNA1H
		NNMT																																											NFATC2
		PER1																																											TMEM173
		PNPLA2																																											COLEC11
		EIF4G2																																											NR2F2-AS1
		CYSTM1																																											PSMC6
		UBE2V1																																											TIMP1
		MLF2																																											MYL6
		PDK4																																											DYNLT3
		EIF3J																																											VPS28
		SNHG12																																											PCED1A
		PNN																																											GGT5
		PCGF5																																											PDHB
		PSMD11																																											SF3B2
		FHL2																																											CCDC151
		VAPA																																											CA2
		PITHD1																																											TBCB
		UTP18																																											PLA2G4C
		TKT																																											SLC40A1
		SDC4																																											PRPF38B
		RHEB																																											CCT2
		EPS8																																											HADHA
		CCT7																																											CDC42EP1
		IVNS1ABP																																											AAED1
		HNRNPK																																											ACADVL
		TMEM165																																											SCML1
		UBE3A																																											NDUFB5
		NGRN																																											SH2D3C
		CDC42EP4																																											EVA1B
		SAT1																																											DDX24
		UBA2																																											NAB1
		SMCHD1																																											PSMA3
		MAPRE1																																											C10orf128
		HAS2																																											PLEKHH3
		DCBLD2																																											IFT43
		BOC																																											IL1RAP
		CFB																																											PCF11
		STIP1																																											EPS8L1
		MAFF																																											HRC
		RDH10																																											RAPH1
		PIGT																																											BACH1
		TRIB1																																											GTF2B
		BCL3																																											MTCH2
		DBN1																																											ARHGAP1
		REL																																											MRVI1
		GNS																																											STAT6
		EIF5B																																											UBE2L3
		AFF4																																											NDUFV1
		PPP2R2A																																											RPS7
		DCUN1D5																																											UQCRH
		PTBP1																																											NT5DC2
		MAP2K1																																											TJP1
		MBNL1																																											SMC6
		CD200																																											PSMA2
		KPNA4																																											DARS
		UQCRFS1																																											PCBP1
		GNG12																																											PCDH18
		SH3BGRL3																																											HSD17B11
		METAP2																																											HADHB
		SQSTM1																																											OCEL1
		SAFB2																																											MDH1
		TMEM176A																																											ATP6V0D1
		WAPL																																											AC147651.4
		SCARA3																																											ABI2
		COQ10B																																											SLC25A6
		GABPB1																																											TOB2
		LTBR																																											EID1
		LAMC1																																											FOXC2
		MRGPRF																																											BLOC1S1
		GNPTG																																											BTG1
		SS18L2																																											MRPS26
		AHSA1																																											ATP5A1
		GSTM5																																											COX6A1
		HEG1																																											CABP1
		LARP6																																											NUCKS1
		HSPH1																																											PRRT2
		FUNDC2																																											ISCA1
		NFATC1																																											PSMC5
		CPZ																																											NRIP2
		CCL2																																											DCLK3
		CNN1																																											LAMA5
		CD68																																											CTSC
		IDI1																																											LCP2
		ALKBH2																																											IDH3G
		GUSB																																											RNH1
		ARF1																																											MEF2D
		GSTM3																																											EPHX1
		STEAP1																																											DDIT3
		H2AFX																																											PLS3
		MGAT1																																											SDHAF3
		RAB7A																																											ARHGAP10
		NOB1																																											RBM17
		TPPP3																																											FKBP1A
		CPE																																											CYTH3
		MT1E																																											IMMT
		GBE1																																											GUSB
		WDR45B																																											SVBP
		MTCH1																																											MAGI1
		FXYD5																																											NDUFA8
		IMP4																																											MTIF3
		CD59																																											CARD16
		ALG13																																											P2RX4
		CREG1																																											GBP2
		ZNF331																																											TNIP2
		EGR3																																											SPEN
		CBR3																																											CFL1
		FAT1																																											PLEKHB2
		CCDC85B																																											REEP3
		ARL5A																																											MALSU1
		WDR1																																											STARD13
		NUDT4																																											RHOG
		TRAF4																																											UBE2E2
		HNRNPA0																																											SEPP1
		DDAH2																																											SCIN
		TSC22D2																																											PDCD10
		TCERG1																																											C19orf70
		JAG1																																											SLAIN2
		ADSS																																											SRSF10
		TXN																																											EWSR1
		CPQ																																											ICAM2
		ADAMTS4																																											LGALSL
		EMP3																																											BCAP29
		PUF60																																											ZBTB38
		LMNA																																											CSK
		PTGES3																																											DNMT1
		DUSP5																																											PRPF31
		TGIF1																																											TMEM11
		SMS																																											FAM204A
		S100A16																																											PSMD12
																																													KLF11
																																													SGCE
																																													PSMA7
																																													H3F3A
																																													RNF7
																																													UQCRC1
																																													NSMCE1
																																													CMC2
																																													COX6B1
																																													MRPL15
																																													NSL1
																																													PLPPR4
																																													LAPTM4B
																																													TXNDC17
																																													MAP2
																																													ZNF280D
																																													TSC22D3
																																													XRCC6
																																													NRGN
																																													CAP1
																																													VCP
																																													SLC25A11
																																													TNFRSF14
																																													RASD2
																																													CCT6A
																																													HTR1F
																																													SDHA
																																													HDAC1
																																													CSRNP3
																																													NSRP1
																																													MALAT1
																																													SSBP2
																																													COX14
																																													WBP11
																																													RNF113A
																																													FAM127B
																																													SYT11
																																													DGKH
																																													RP11-395G23.3
																																													NDUFB10
																																													RP11-499P20.2
																																													MRPL32
																																													MIF4GD
																																													EMC2
																																													MRPS34
																																													TUBA1B
																																													PPP6C
																																													PSMC2
																																													GLUD1
																																													SLC12A2
																																													DDX1
																																													CSRP1
																																													NDUFAF4
																																													PVRL1
																																													ACO2
																																													BCAS2
																																													PI15
																																													IKBIP
																																													MDH2
																																													AKAP13
																																													TACC2
																																													FGD4
																																													ESYT1
																																													PFN1
																																													PARD6G
																																													GLRX
																																													HMCES
																																													C3orf70
																																													TMEM59
																																													IFI16
																																													PPP2R1A
																																													DYNLL1
																																													GADD45GIP1
																																													PTPRG
																																													LTBP4
																																													TIPRL
																																													PDE6D
																																													ELOVL1
																																													RAP1A
																																													PHF5A
																																													CFH
																																													HAT1
																																													DDAH2
																																													UQCRFS1
																																													NDFIP1
																																													C9orf78
																																													CTBP2
																																													MED19
																																													TMX3
																																													FAM50A
																																													MAP2K3
																																													SNW1
																																													PDZD11
																																													TAF7
																																													EIF1B
																																													ACVRL1
																																													NASP
																																													CCDC12
																																													ZMIZ1
																																													ATG3
																																													UBE2B
																																													SP100
																																													HEY1
																																													RGL3
																																													NDUFS3
																																													FAM46A
																																													SIDT2
																																													BST1
																																													MGST3
																																													C5orf24
																																													DEGS1
																																													OSBPL1A
																																													RBCK1
																																													SETBP1
																																													CACNA1C
																																													FHL1
																																													GPR20
																																													PRKAA1
																																													ATP5H
																																													DIMT1
																																													S100A3
																																													INPP5A
																																													PSIP1
																																													GLRX5
																																													SNRPB
																																													RARB
																																													CLK4
																																													GBP4
																																													UBE2D2
																																													FAM49A
																																													FYTTD1
																																													DCTN3
																																													MPC1
																																													ACER3
																																													TAOK3
																																													LBH
																																													NCOR1
																																													IGHA2
																																													ADCY4
																																													TRAPPC1
																																													BUD31
																																													IL17RE
																																													RAD21
																																													DDX3Y
																																													RRAGA
																																													NDC80
																																													TRMT10C
																																													BCL2L13
																																													CRTC3
																																													DAB2IP
[truncated: 36 more columns]

## Sheet: Table S7
	Androgen	EGFR	Estrogen	Hypoxia	JAK-STAT	MAPK	NFkB	p53	PI3K	TGFb	TNFa	Trail	VEGF	WNT
BE_2	-2.05389	1.04141	1.60849	0.113855	-1.28052	1.55211	-0.758795	-0.0891032	-0.269765	-0.165529	-0.559528	-0.0948714	0.102776	0.31005
CA_16	-1.61467	1.68613	0.413063	-0.615227	0.231242	1.22943	-1.44293	1.5489	-0.616897	-0.519089	-1.17806	-0.687744	-0.196965	-0.59577
BE_7	0.474282	1.16987	0.874352	-0.398955	-1.5159	0.825888	-1.63816	1.15423	0.121245	-0.582096	-1.6049	-2.80717	1.41156	-1.50239
BE_9	-0.191083	0.252578	0.11954	-0.797038	-1.40932	0.479275	-0.268314	1.46144	-0.172078	-1.89565	-0.24388	-1.10804	-0.0374289	-2.2786
CA_11	0.206127	0.146115	0.237893	-0.393581	1.09491	0.27204	0.361932	-0.393439	-1.3834	0.0176928	0.0451777	-2.07539	0.100547	0.485592
BE_4	-0.54615	-1.22544	-1.20373	-0.743397	0.826327	-0.696271	0.623259	-0.623734	-1.97857	-1.11694	0.79156	0.783543	-0.658784	-0.743282
BE_6	-0.295849	0.039084	0.123002	-0.685027	0.0756883	-0.248099	0.750473	0.923836	-0.991345	-1.18804	0.936083	0.980192	0.101748	-0.9843
CA_7	-0.325629	-0.15454	-0.0171845	-0.312629	0.705216	-0.770471	-0.192755	0.168889	0.149849	-0.477976	-0.231226	0.566467	-1.00298	-0.763539
BE_12	0.730558	1.09616	0.57392	-0.253497	0.0300885	0.664676	0.550016	0.170878	1.21122	-0.391419	0.497609	-0.354986	-0.841244	-0.310177
CA_10	0.610696	0.373487	-1.08759	-0.0787693	0.0591404	0.556821	-0.197302	0.394726	1.06543	-0.845044	-0.195169	0.316482	0.0589041	-0.708948
CA_1	0.806438	0.578779	-1.45965	-0.494404	1.62778	0.584818	1.5116	1.57453	0.367414	-0.66039	1.38245	0.190683	-1.48806	-0.147273
CA_19	0.175536	0.966422	0.330432	-0.353129	-0.455575	0.628712	2.01906	-0.203619	0.317683	0.329039	1.93981	0.33457	-0.782812	-0.788789
CA_3	-0.436788	0.279102	-0.333341	-0.754789	-0.79128	0.561981	-0.711388	1.152	0.294842	-1.099	-0.461954	-0.723845	-0.843831	-0.882093
BE_13	0.676718	0.789894	-0.584807	-0.652997	-0.115924	0.468991	0.398385	-0.495714	-0.640335	-0.503338	0.11913	0.455854	-1.48585	-0.240002
CA_6	1.43184	1.553	-0.537774	-0.752835	0.378975	1.10136	1.02028	-1.19115	0.581805	-0.396535	0.89823	0.899279	0.0365833	-0.788696
CA_15	-1.49236	-1.04071	-0.909539	-0.49303	-0.331521	-1.28733	-0.325921	-0.546091	-0.682596	-0.321832	-0.0233953	-0.268324	1.49774	1.40772
BE_8	0.415046	-0.232549	-1.58366	-0.596725	1.11244	-0.413861	0.544114	0.515684	-0.156253	-0.979602	0.379436	-0.269822	0.608974	-0.656317
CA_14	0.214807	-0.806988	-1.28701	-0.880493	0.113724	-0.414335	-0.11675	-0.280118	-0.891669	-1.51105	-0.145607	0.572228	-0.441767	-0.707762
BE_3	-0.222969	-0.788325	0.191781	-0.386523	0.359957	-1.36654	0.128428	-0.363138	-0.773289	-0.280382	-0.0831652	2.23752	-0.888033	-0.641949
CA_8	0.564557	-0.00749198	-0.92791	0.0129783	-0.383875	-0.746417	0.906117	-0.424851	0.467468	0.842603	0.926425	-0.158309	-0.157262	-0.316139
BE_17	-0.971746	-1.53132	1.41002	0.390784	-0.140825	-1.38509	-0.438194	0.802383	-0.409213	1.60561	-0.810545	-1.24972	-0.453502	0.150509
CA_17	-1.11937	-0.717786	0.975919	0.23742	0.471612	-0.216704	-0.013252	1.48948	-1.74825	-0.261677	0.0205959	-1.15538	-0.780469	0.945795
BE_19	1.47016	-0.196771	-1.10494	0.842945	0.539608	0.226081	-0.0639015	1.7833	-0.138737	0.39779	0.328363	0.144155	0.455178	0.455052
CA_9	1.61212	0.618007	-0.798481	1.60239	-0.183686	1.63559	-0.466728	-0.451021	0.55962	1.21444	0.930914	0.277858	1.63003	1.6747
CA_4	0.390434	-0.758128	-0.979086	-0.79511	-0.532275	-0.709677	0.630868	-1.43416	-0.239536	-0.633871	-0.0544393	0.727385	-0.121531	-0.330003
BE_1	1.3801	-0.0578194	-0.24234	0.144442	2.55311	-0.24684	1.8479	0.929577	0.0158314	0.385438	1.6644	2.27323	0.609093	0.209098
BE_11	0.0102355	1.00639	-0.684221	-0.415298	0.221596	0.530605	1.24693	-0.24085	0.898052	-0.598004	0.891067	0.254663	-0.254357	-1.14274
BE_14	-2.46546	-0.542935	0.397681	-0.532459	0.378506	-1.23806	-0.640812	-0.547932	-1.04437	0.288443	-1.04294	-0.15219	-1.32955	-0.610285
BE_16	0.579952	-1.26527	-0.32451	-0.192618	1.79995	-1.47897	0.416166	-0.116308	-0.380605	0.391973	0.523421	0.38129	-1.21727	0.222905
BE_15	0.582164	-0.0235953	-0.31063	-0.273624	0.671663	-0.376818	1.16008	-0.0990852	0.487014	0.706792	1.63109	-0.682954	-0.845097	0.775159
CA_5	0.522655	0.958046	-0.363324	0.503246	0.289915	1.22999	0.250567	-0.0148051	0.0311274	1.14804	0.205301	0.266994	0.0617503	1.35678
CA_2	-1.69204	-2.93033	1.15652	4.11788	-1.30901	-2.17018	-1.12975	-0.0971117	-0.168716	1.86666	-1.73314	-1.13358	2.09595	1.48839
CA_12	-0.148044	0.118759	2.44847	2.00641	-2.09886	0.150422	-1.69247	-1.75619	1.96671	1.15062	-1.90436	0.840788	0.212176	1.46112
CA_13	1.1063	1.34934	1.48408	-0.453855	-1.42135	1.91918	-1.7828	-2.39724	3.43919	-0.0666388	-1.47112	0.111922	1.94958	1.72716
BE_5	-0.355684	-0.463711	0.761313	0.902341	-1.35403	0.468107	-1.80039	-1.19115	0.251368	2.24205	-1.51537	0.523976	2.11431	1.20919
BE_18	-0.0289983	-1.27887	1.63324	1.43131	-0.217506	-1.32041	-0.68557	-1.11304	0.459762	1.90693	-0.852263	-0.216754	0.779876	1.25983

## Sheet: Table S8
	logFC	AveExpr	t	P.Value	adj.P.Val	B
ALDH1A1	-3.67544	8.22353	-8.23161	6.71855e-10	7.03791e-07	12.4967
DHRS3	-2.86278	7.9434	-9.26399	3.38743e-11	6.26196e-08	15.2962
FBLN1	-2.59911	7.69981	-7.03074	2.5193e-08	1.34189e-05	9.07105
PTGDS	-2.43568	6.43716	-6.01489	5.89702e-07	0.000121124	6.07533
RARRES2	-2.42069	7.14673	-5.46098	3.32926e-06	0.000417448	4.42935
SVEP1	-2.39364	7.35038	-7.81432	2.32849e-09	1.87629e-06	11.3249
PITX1	-2.31734	7.25047	-3.88086	0.000411369	0.0138412	-0.12432
RARRES1	-2.2701	7.27565	-5.15795	8.55637e-06	0.000837672	3.53256
CFD	-2.26033	6.6615	-3.76548	0.00057517	0.0174472	-0.437621
RGS2	-2.18111	7.77221	-10.3293	1.78841e-12	5.10931e-09	18.0235
ALDH1A3	-2.10753	7.03338	-6.52194	1.21419e-07	4.28733e-05	7.57788
LXN	-2.05331	8.93644	-9.62173	1.24104e-11	2.43756e-08	16.2308
LAMA4	-2.00368	7.01381	-9.23439	3.68359e-11	6.43115e-08	15.218
RARRES3	-1.91914	7.01737	-6.30655	2.37327e-07	6.46383e-05	6.94085
VCAM1	-1.79908	7.11292	-3.6768	0.00074243	0.0206965	-0.675686
C1S	-1.7711	7.58363	-7.43071	7.41831e-09	4.75771e-06	10.2295
SMPDL3A	-1.74135	7.11096	-5.38166	4.26406e-06	0.000494474	4.19414
PAMR1	-1.72463	7.40805	-8.3843	4.28424e-10	5.17832e-07	12.92
RDH10	-1.72345	7.54314	-6.53933	1.15036e-07	4.10808e-05	7.6292
SNCA	-1.72105	6.31124	-4.2185	0.000151557	0.00677967	0.81305
MKX	-1.71877	7.41331	-6.43707	1.58073e-07	5.05959e-05	7.32716
SNCAIP	-1.69866	6.28348	-4.87409	2.06076e-05	0.00157955	2.69862
DPP4	-1.68964	6.3128	-5.50933	2.86284e-06	0.000371767	4.57283
S1PR3	-1.68615	6.93771	-8.71198	1.64652e-10	2.24972e-07	13.8177
PTGER2	-1.65474	6.64088	-6.27562	2.61344e-07	6.90167e-05	6.8492
TMEM51	-1.64791	7.39484	-7.17634	1.61176e-08	9.37982e-06	9.49455
C13orf15	-1.64582	6.78952	-3.54797	0.00107146	0.0268088	-1.01691
C1R	-1.61291	6.55552	-7.12932	1.8615e-08	1.06363e-05	9.35799
ASAM	-1.60951	6.66157	-6.43156	1.60806e-07	5.05959e-05	7.31087
WNT2	-1.57631	5.78382	-4.65066	4.09439e-05	0.00255225	2.04842
FBN2	-1.55521	8.31389	-4.53548	5.81929e-05	0.00337764	1.71598
TMEM176A	-1.53066	5.33761	-3.81222	0.000502349	0.0159947	-0.311177
ANGPTL2	-1.52793	7.20364	-6.59801	9.58792e-08	3.65523e-05	7.80227
MX1	-1.52667	5.98006	-3.76732	0.000572127	0.0174222	-0.43267
RHOBTB3	-1.5102	8.23167	-6.90408	3.72044e-08	1.85585e-05	8.70118
CLDN11	-1.50863	9.28302	-4.67607	3.78796e-05	0.00244939	2.12203
SERPINF1	-1.49808	6.24057	-3.68941	0.000716058	0.0201819	-0.641985
PDPN	-1.49731	5.59706	-3.64585	0.000811188	0.0220606	-0.758173
HSD17B6	-1.48784	6.62995	-3.76185	0.000581249	0.0175638	-0.447436
FOXF1	-1.47968	6.75969	-6.22847	3.02732e-07	7.61094e-05	6.70941
MOXD1	-1.47571	6.92938	-6.38549	1.85594e-07	5.71813e-05	7.17459
IGFBP3	-1.47263	7.79447	-3.63986	0.000825175	0.0222783	-0.774087
SFRP1	-1.46613	7.32591	-4.80197	2.57353e-05	0.0018507	2.48805
ISOC1	-1.44731	7.4161	-6.01185	5.95322e-07	0.000121484	6.06631
ASS1	-1.43766	6.4483	-6.50912	1.26355e-07	4.36354e-05	7.54001
CTSH	-1.41695	5.8726	-4.27429	0.000128216	0.00609581	0.970541
PSG4	-1.39232	5.62912	-3.25188	0.00244119	0.0459107	-1.77821
BMP4	-1.39073	6.58096	-5.4945	2.99855e-06	0.000386199	4.5288
CFH	-1.38786	6.21595	-6.43118	1.61e-07	5.05959e-05	7.30972
RBP1	-1.38371	6.17661	-3.75315	0.000596029	0.0178389	-0.470874
IFITM1	-1.36813	6.33021	-3.78887	0.000537547	0.0167755	-0.374448
PSG5	-1.35111	5.36004	-3.65616	0.000787619	0.0216361	-0.73072
PODN	-1.35093	6.92456	-4.66948	3.86517e-05	0.00246884	2.10294
TGM2	-1.35082	7.3218	-6.54658	1.12472e-07	4.06271e-05	7.65061
OBFC2A	-1.34745	7.86238	-7.06558	2.26359e-08	1.24799e-05	9.17256
FAM105A	-1.34288	6.04087	-5.22979	6.8435e-06	0.000709782	3.74469
SPON2	-1.34245	5.92586	-3.23516	0.00255509	0.0472886	-1.82015
COL15A1	-1.34067	7.58533	-3.48184	0.001291	0.0304849	-1.18983
ADAMTS19	-1.3329	5.66341	-3.70353	0.000687603	0.0197159	-0.60419
ARHGEF3	-1.32884	5.98503	-6.03552	5.52884e-07	0.00011661	6.13664
LIMCH1	-1.3059	6.44088	-4.60096	4.76624e-05	0.00288601	1.9047
BDKRB1	-1.30552	5.74339	-4.40045	8.76653e-05	0.0046302	1.32901
ABCC3	-1.28777	6.23397	-6.15125	3.85211e-07	8.58556e-05	6.4803
ABCC4	-1.28706	6.90854	-5.15841	8.54408e-06	0.000837672	3.53392
LAMA2	-1.24673	5.77706	-6.65007	8.15877e-08	3.28715e-05	7.9556
MASP1	-1.23455	5.8668	-7.41267	7.83631e-09	4.92528e-06	10.1776
TMEM158	-1.22504	8.00051	-4.80358	2.56082e-05	0.0018507	2.49274
TNFRSF21	-1.22205	6.32919	-3.626	0.000858475	0.0230388	-0.810905
CPZ	-1.21322	5.5525	-4.63292	4.32278e-05	0.00266368	1.99707
ATP8B4	-1.20945	5.58604	-3.66917	0.000758826	0.021065	-0.696036
CEBPD	-1.20565	8.12613	-6.30484	2.38594e-07	6.46383e-05	6.93579
DIO2	-1.20115	5.82052	-3.53065	0.00112522	0.027756	-1.06236
KCNJ2	-1.20111	6.06792	-4.01606	0.000276613	0.0104711	0.247583
SULF2	-1.20026	5.85768	-3.83092	0.000475799	0.0153516	-0.260422
QPRT	-1.19871	6.03488	-4.2683	0.000130541	0.00615974	0.953613
MAN1C1	-1.18885	5.57898	-4.42016	8.25911e-05	0.00441413	1.38528
CASP1	-1.18747	6.21393	-4.67473	3.80352e-05	0.0024544	2.11815
TMEM140	-1.17896	5.94188	-6.77554	5.53276e-08	2.55695e-05	8.32447
FAM20A	-1.1703	5.34461	-4.21097	0.000155009	0.0068707	0.791847
APOD	-1.16976	5.19151	-4.01992	0.000273483	0.0104049	0.258261
AKR1C4	-1.15795	6.41709	-3.53648	0.00110683	0.027376	-1.04706
DRAM1	-1.15471	7.60172	-7.26906	1.21387e-08	7.46791e-06	9.7632
PDE8B	-1.1542	5.72302	-4.69594	3.56425e-05	0.00231426	2.17965
IGFBP6	-1.15414	8.45633	-5.56237	2.42584e-06	0.000335834	4.73031
PDGFD	-1.13963	5.66858	-3.317	0.00204191	0.0411076	-1.6137
GBP2	-1.13098	7.6087	-5.06421	1.14459e-05	0.00105437	3.25636
NR2F1	-1.12611	7.67099	-7.26323	1.2357e-08	7.46791e-06	9.74631
MGST1	-1.11392	7.10579	-3.75445	0.000593801	0.0177891	-0.467378
EPHA4	-1.11386	5.9012	-5.6304	1.9613e-06	0.000283318	4.93242
CLDN23	-1.11333	5.94604	-3.51771	0.00116706	0.0284973	-1.09624
TMTC1	-1.10785	6.14595	-4.35298	0.000101179	0.00517018	1.19377
GDF15	-1.10687	6.54416	-3.23295	0.00257049	0.0473784	-1.82568
SLC2A12	-1.10444	5.97451	-4.24719	0.000139078	0.00642744	0.893952
DENND2A	-1.09348	5.90017	-3.66755	0.000762362	0.0211084	-0.700366
PERP	-1.08789	7.76265	-8.34819	4.76402e-10	5.54497e-07	12.8202
FAM89A	-1.08712	5.94323	-5.49857	2.96064e-06	0.000382886	4.5409
FBLN5	-1.08524	7.33313	-5.69961	1.57982e-06	0.000244568	5.13811
PDE5A	-1.08391	6.93407	-4.7273	3.23734e-05	0.00215088	2.27072
DUSP5	-1.08162	7.02747	-4.11182	0.000208315	0.00856871	0.513865
TPST1	-1.07488	7.18947	-7.63264	4.02361e-09	2.9406e-06	10.8082
SYPL2	-1.07338	5.35958	-4.21616	0.000152618	0.00681273	0.806482
SEPP1	-1.06141	5.20533	-3.35812	0.00182279	0.037986	-1.50896
HTR2B	-1.04684	5.42651	-4.52821	5.94956e-05	0.00343066	1.69506
IMPA2	-1.04358	5.54036	-4.32433	0.000110305	0.00545899	1.11234
ABCA1	-1.03316	7.11567	-6.74675	6.04797e-08	2.67855e-05	8.23993
GABARAPL1	-1.03283	6.93306	-5.01493	1.33344e-05	0.00114807	3.11145
TMOD1	-1.02001	5.81479	-3.7657	0.000574816	0.0174472	-0.437046
GCLM	-1.01201	6.99406	-6.18472	3.47003e-07	8.07772e-05	6.57963
NBL1	-0.992889	7.86592	-5.836	1.03143e-06	0.000178258	5.54359
NXN	-0.985279	6.85643	-7.58603	4.63223e-09	3.23494e-06	10.675
HOXA13	-0.984473	6.332	-4.87483	2.05609e-05	0.00157955	2.70078
LAYN	-0.982941	6.65899	-5.29166	5.64467e-06	0.000615935	3.92763
BDKRB2	-0.974786	5.475	-4.74798	3.0382e-05	0.00208468	2.33084
SOX4	-0.97129	6.8681	-6.08289	4.76854e-07	0.000102986	6.27734
LUM	-0.969795	7.93656	-3.20912	0.00274262	0.0497191	-1.88525
GPRC5A	-0.96802	5.38556	-4.91473	1.81784e-05	0.00146311	2.81753
CTSB	-0.966484	7.81199	-5.72059	1.47956e-06	0.00023193	5.20046
ASAP3	-0.957398	6.58254	-6.20666	3.24044e-07	7.77486e-05	6.64473
FLRT3	-0.954467	5.47794	-4.46459	7.2185e-05	0.00396588	1.51242
MMD	-0.952291	6.80425	-3.70909	0.000676701	0.0194922	-0.58929
LTBP4	-0.947781	6.40275	-4.64521	4.16331e-05	0.00258059	2.03263
DCN	-0.946154	8.80897	-4.92882	1.7404e-05	0.00142804	2.85881
NINJ1	-0.941841	7.44253	-5.85092	9.84438e-07	0.000172889	5.58794
WNT5A	-0.937631	7.3393	-3.37287	0.00174982	0.0370614	-1.47123
CYP27A1	-0.933376	5.72819	-5.78318	1.2166e-06	0.000199221	5.38656
TGFBR3	-0.933216	6.38033	-3.60599	0.000908822	0.0238403	-0.86392
HEG1	-0.925602	7.3764	-4.73917	3.12154e-05	0.0020961	2.30521
GLRX	-0.924832	8.54181	-5.38655	4.19959e-06	0.000494474	4.20862
CNTN3	-0.923713	5.33696	-5.0465	1.2092e-05	0.00108353	3.20425
S1PR1	-0.918262	5.57322	-5.03211	1.26431e-05	0.00110675	3.16196
ITGA2	-0.911379	6.05497	-4.36349	9.80229e-05	0.00503344	1.22366
PRICKLE1	-0.909091	6.66423	-5.00454	1.37701e-05	0.00117273	3.08095
SOD2	-0.908088	6.24593	-3.98957	0.000299085	0.0111231	0.174315
LOC283683	-0.899023	5.4275	-4.53514	5.82537e-05	0.00337764	1.71499
FGF7	-0.892466	5.24905	-4.86648	2.1097e-05	0.00161312	2.67638
C10orf54	-0.892426	5.73101	-3.65056	0.000800328	0.0218812	-0.745625
ANXA3	-0.891102	5.45752	-3.86496	0.000430907	0.0142896	-0.167738
PRRG1	-0.889885	6.41952	-6.18098	3.51076e-07	8.11244e-05	6.56854
C14orf132	-0.88731	6.80521	-4.67166	3.83955e-05	0.00246249	2.10923
RASL11A	-0.880669	5.68236	-4.09745	0.000217402	0.00884985	0.47374
STOM	-0.878717	8.30136	-4.8997	1.90417e-05	0.00149228	2.77354
RASSF2	-0.874195	5.82407	-3.23093	0.0025847	0.0475288	-1.83075
RND3	-0.869201	8.76236	-5.19341	7.66344e-06	0.000772831	3.63721
CAMK2N1	-0.868177	8.58674	-6.48674	1.35455e-07	4.57721e-05	7.47392
VTN	-0.862001	5.11416	-3.61172	0.000894135	0.0236212	-0.848767
HHEX	-0.860057	5.51876	-3.55287	0.00105671	0.0265879	-1.00404
UBE2L6	-0.859689	6.84468	-6.34377	2.11343e-07	6.28514e-05	7.05109
PIM1	-0.857878	5.93279	-4.10909	0.000210011	0.00862718	0.506244
C1RL	-0.855828	6.2896	-5.32506	5.08678e-06	0.000564866	4.0265
FAM92A1	-0.849749	6.61165	-4.11474	0.000206516	0.0085507	0.522012
CSMD2	-0.849496	5.29804	-5.04961	1.19757e-05	0.00108353	3.21342
SLIT2	-0.848391	6.65197	-3.34003	0.00191627	0.0393342	-1.55512
SMAD6	-0.844659	6.14423	-4.46218	7.27155e-05	0.00398111	1.50551
FAM20C	-0.843242	5.70504	-6.31128	2.33852e-07	6.44846e-05	6.95487
IL6ST	-0.838338	5.67395	-6.08759	4.69901e-07	0.000102549	6.29131
FAM117B	-0.833814	5.96366	-3.43102	0.00148841	0.0335302	-1.32161
GPR137B	-0.833308	6.31635	-5.83571	1.03236e-06	0.000178258	5.54274
DDIT4L	-0.832198	5.72098	-4.14627	0.000188025	0.00797958	0.610193
LY6E	-0.829232	8.06568	-5.80472	1.13739e-06	0.00019217	5.45059
FAM167A	-0.82171	5.18027	-3.24657	0.00247683	0.0464297	-1.79154
ACVRL1	-0.821061	5.47913	-3.7506	0.00060043	0.0179194	-0.477739
PCOLCE	-0.81874	8.17247	-3.36835	0.00177186	0.0373707	-1.48279
ANKRD29	-0.818047	5.60334	-3.59849	0.000928438	0.0241732	-0.883778
LOC392871	-0.811501	5.21806	-4.75324	2.98952e-05	0.00206397	2.34613
JUP	-0.811467	5.5816	-3.25375	0.0024287	0.0458075	-1.77349
SCARB1	-0.806349	5.8174	-5.96638	6.86206e-07	0.000135173	5.93118
TCF21	-0.804526	6.42602	-3.51618	0.0011721	0.0285758	-1.10023
TXNRD1	-0.797919	8.0677	-6.26151	2.73091e-07	7.09872e-05	6.80739
HSPA2	-0.797277	5.60388	-3.86784	0.0004273	0.0141948	-0.159874
RAB8B	-0.795504	7.13575	-5.04264	1.22372e-05	0.00108353	3.19293
TNFRSF14	-0.792757	6.9461	-4.24801	0.000138736	0.00642108	0.89627
MAN1A1	-0.792183	5.76446	-4.74632	3.0537e-05	0.0020857	2.32601
SLC39A8	-0.7912	5.35881	-4.32946	0.000108613	0.0054093	1.12692
MOSPD1	-0.787405	5.9547	-6.22236	3.08552e-07	7.63507e-05	6.69131
IFIT1	-0.7843	6.29187	-3.70599	0.000682766	0.0196309	-0.597608
TGFBR2	-0.781236	7.42707	-6.16045	3.743e-07	8.40196e-05	6.50763
SLC15A3	-0.779503	6.33441	-4.32373	0.000110503	0.00546016	1.11065
PPARG	-0.778615	5.8075	-3.38042	0.00171354	0.0366076	-1.45187
CYB5A	-0.77673	7.26202	-5.35291	4.66387e-06	0.000527219	4.10898
AVPI1	-0.773985	7.49349	-4.85304	2.19895e-05	0.00167322	2.63711
C1QTNF1	-0.769277	5.49612	-3.72955	0.000638003	0.0187909	-0.534373
GDPD5	-0.765715	5.65451	-3.72075	0.000654382	0.0191655	-0.558015
PSG6	-0.765614	4.83092	-3.31968	0.00202692	0.0408867	-1.60691
GTF2IP1	-0.764392	6.61865	-6.47087	1.42304e-07	4.65838e-05	7.42704
LOC100132510	-0.760313	5.70579	-4.65448	4.04684e-05	0.00252864	2.05948
METTL7A	-0.758782	5.49777	-4.40863	8.55234e-05	0.00454765	1.35235
PTGES	-0.758322	5.41831	-4.75655	2.95928e-05	0.00206397	2.35576
TMEM176B	-0.757873	4.84207	-3.56381	0.00102448	0.0259848	-0.975262
USP53	-0.75584	5.36054	-3.58646	0.00096072	0.0247373	-0.915553
C4orf18	-0.753955	6.04503	-3.25064	0.00244946	0.0460386	-1.78132
LACTB2	-0.738881	6.50145	-5.65344	1.82508e-06	0.000269272	5.00087
FTH1	-0.738662	7.91461	-4.50439	6.39673e-05	0.00364173	1.62658
HIST2H2AA4	-0.738188	6.33403	-3.34428	0.00189389	0.0389511	-1.54428
CSDC2	-0.735311	5.83437	-3.69013	0.000714583	0.0201584	-0.640064
LRRC8D	-0.728295	5.66181	-5.96723	6.84393e-07	0.000135173	5.9337
BNC2	-0.727531	6.12704	-5.10963	9.9414e-06	0.000953808	3.39012
HIST2H2AA3	-0.724023	6.31374	-3.45552	0.00138987	0.0319517	-1.2582
BAG2	-0.722783	6.49625	-6.24063	2.9147e-07	7.38688e-05	6.74546
MME	-0.722343	5.19827	-3.30119	0.00213271	0.041994	-1.65381
LMO4	-0.718196	7.88352	-8.18378	7.73954e-10	7.84589e-07	12.3635
MFSD6	-0.715806	6.05089	-3.63114	0.000845987	0.0227231	-0.797269
STK38	-0.715764	6.23988	-5.87094	9.24714e-07	0.000165843	5.64747
NFE2L3	-0.712745	5.29987	-3.75818	0.00058743	0.0176656	-0.45731
C8orf13	-0.710183	5.00706	-3.25632	0.00241172	0.0456021	-1.76704
KITLG	-0.704743	6.13489	-4.03912	0.000258403	0.00998842	0.311489
LHFPL2	-0.704677	6.73121	-4.25427	0.000136155	0.00633897	0.913954
IL18BP	-0.703826	5.29955	-3.43923	0.00145468	0.0330201	-1.3004
PAPSS2	-0.700344	8.32536	-3.47185	0.00132769	0.031088	-1.2158
GAS6	-0.697284	7.6684	-3.40244	0.00161185	0.0351689	-1.39532
IFI6	-0.692214	7.10785	-3.8564	0.000441791	0.0145227	-0.191074
MDK	-0.685008	6.2192	-4.12732	0.000198938	0.00831359	0.557153
GCLC	-0.684356	5.85008	-5.63743	1.91868e-06	0.000280775	4.95331
PLEKHH2	-0.683587	5.35442	-5.25688	6.29019e-06	0.000674288	3.82477
BOC	-0.681423	5.00983	-5.8164	1.09662e-06	0.000187295	5.48531
SGCD	-0.680872	5.56901	-3.96356	0.000322862	0.0117387	0.102591
ADAMTS5	-0.680756	6.22578	-3.24068	0.00251693	0.0468293	-1.80632
LRCH2	-0.680289	6.1107	-5.96948	6.79582e-07	0.000135173	5.94041
PDE7B	-0.679221	5.19368	-3.59469	0.000938516	0.0242947	-0.893817
SEMA3B	-0.678392	5.38711	-4.81362	2.4829e-05	0.00182307	2.52202
CTSA	-0.676061	7.14626	-5.43286	3.63462e-06	0.000444669	4.34594
ANTXR2	-0.675111	7.77697	-5.92146	7.89637e-07	0.000146835	5.79766
MFSD1	-0.67458	8.08801	-5.8902	8.70678e-07	0.000159081	5.70473
HIST1H2BK	-0.672603	7.63632	-3.42627	0.00150827	0.0337556	-1.33388
LTBR	-0.672147	6.89981	-4.73703	3.14209e-05	0.00210092	2.299
EPAS1	-0.668877	8.24458	-3.6959	0.000702836	0.0199976	-0.624616
NIPA1	-0.666113	6.63882	-4.8371	2.30969e-05	0.0017282	2.59054
SLC27A6	-0.666043	5.20527	-3.57969	0.000979372	0.0251042	-0.933426
C6orf192	-0.66446	5.47462	-6.02436	5.72508e-07	0.00011915	6.10347
MRGPRF	-0.663599	7.21399	-3.60423	0.000913396	0.0238685	-0.868589
CROT	-0.662271	5.809	-3.827	0.000481245	0.0154638	-0.271063
FTHL3	-0.657686	8.01629	-4.58931	4.93868e-05	0.00296755	1.87109
ADM	-0.656074	8.55964	-4.44277	7.71233e-05	0.00416439	1.44994
EPHX1	-0.655666	6.01426	-3.59564	0.000935983	0.0242692	-0.891304
SPATA18	-0.653583	5.95545	-3.50065	0.00122448	0.0294194	-1.14079
IL32	-0.6465	5.17289	-3.80311	0.00051581	0.0162913	-0.335887
BRIX1	-0.644549	7.70229	-3.40198	0.0016139	0.0351689	-1.39649
PHF15	-0.644503	5.69104	-7.74394	2.87694e-09	2.26026e-06	11.1252
SLC40A1	-0.644227	5.22621	-3.22549	0.00262325	0.048097	-1.84436
EDG1	-0.64394	5.67354	-4.5636	5.34157e-05	0.00315097	1.79694
ECGF1	-0.6391	5.93544	-3.66396	0.000770232	0.02127	-0.709931
SQSTM1	-0.636867	9.14488	-6.31119	2.33922e-07	6.44846e-05	6.95459
SCPEP1	-0.635382	6.97603	-4.10251	0.000214156	0.00876312	0.487874
MEIS3P1	-0.630389	6.88723	-5.54877	2.5311e-06	0.000339925	4.68992
PMP22	-0.629962	7.45586	-3.42292	0.00152244	0.0339429	-1.34254
GPC6	-0.629632	6.17567	-3.38896	0.00167339	0.036019	-1.42995
KLHL5	-0.627026	7.4073	-4.42567	8.12248e-05	0.00435927	1.40103
SLC38A1	-0.623026	6.94677	-4.19775	0.000161258	0.00709467	0.75465
C21orf63	-0.622995	5.59707	-3.57445	0.000994046	0.0254001	-0.947246
ARMC4	-0.621766	5.10362	-5.68237	1.66726e-06	0.000255449	5.08687
NUDT7	-0.620509	6.02703	-3.5625	0.00102829	0.0260606	-0.978715
NFE2L2	-0.619451	8.23499	-5.55518	2.48093e-06	0.00033924	4.70896
ZNF521	-0.619056	5.06857	-3.58185	0.000973391	0.0249917	-0.927733
PTDSS1	-0.618837	7.79211	-3.71868	0.000658296	0.0192264	-0.563576
SLC9A9	-0.616237	5.3945	-4.01905	0.000274189	0.0104192	0.255842
WARS	-0.615467	7.99338	-3.76942	0.000568658	0.0173577	-0.42699
SLC25A36	-0.614639	6.03029	-4.76698	2.86596e-05	0.00202395	2.38611
TBL1X	-0.61326	6.72387	-5.72435	1.46227e-06	0.00023193	5.21164
LOC653888	-0.613082	6.02388	-3.74333	0.000613169	0.0182131	-0.497332
CASP4	-0.61295	6.29902	-3.92355	0.000363088	0.0126145	-0.00743101
PRNP	-0.609444	8.69587	-6.33719	2.15719e-07	6.33569e-05	7.03161
ME1	-0.596958	7.29272	-4.34011	0.000105184	0.00530107	1.15717
AKR1B1	-0.596266	7.78167	-3.96977	0.00031703	0.0116119	0.11968
TMEM154	-0.595916	5.24078	-4.3839	9.2163e-05	0.00484333	1.28181
ABHD7	-0.594845	5.2065	-3.35962	0.00181524	0.037922	-1.50513
GK	-0.593753	5.61882	-3.2451	0.00248673	0.0465166	-1.79521
GJA1	-0.592636	8.66704	-3.5066	0.00120415	0.0289973	-1.12526
LACTB	-0.591311	6.4415	-4.22417	0.000149005	0.00670863	0.829035
NAMPT	-0.59111	5.90678	-4.02253	0.000271385	0.0103753	0.265488
STARD5	-0.590038	5.54077	-3.36368	0.00179495	0.0376556	-1.49475
RGS10	-0.588799	6.97405	-3.28237	0.00224574	0.0435916	-1.70139
ZCCHC24	-0.588431	6.96564	-4.96336	1.56416e-05	0.00131432	2.96006
CDC42EP2	-0.587552	6.06375	-3.33685	0.00193315	0.0395516	-1.56322
ZFYVE21	-0.586888	6.90143	-3.69493	0.000704806	0.0199976	-0.627224
LOC729009	-0.586472	8.90126	-4.37667	9.41976e-05	0.00491736	1.2612
HERC6	-0.584908	5.55597	-3.68407	0.000727118	0.0204021	-0.656269
EVI1	-0.584894	5.11676	-4.25346	0.000136486	0.00634499	0.911666
CMBL	-0.584887	7.25125	-3.34721	0.00187865	0.0387646	-1.53683
GULP1	-0.582303	6.0744	-4.61545	4.55976e-05	0.00278784	1.94658
PTPRK	-0.580976	7.43945	-4.26263	0.000132781	0.00622972	0.937585
CDC42EP4	-0.580908	7.50934	-3.46361	0.00135872	0.0315481	-1.23721
LAMB1	-0.578298	7.75693	-4.32979	0.000108505	0.0054093	1.12785
COL6A3	-0.575508	9.16971	-4.20595	0.000157353	0.0069562	0.777725
AK3	-0.574313	7.51003	-5.52737	2.70606e-06	0.000356689	4.62638
VAT1	-0.573069	7.07176	-4.04873	0.000251166	0.00980509	0.338155
LOC340274	-0.568565	5.21961	-4.07657	0.000231288	0.00923388	0.415578
OCIAD2	-0.567797	6.62396	-3.6331	0.000841249	0.0226345	-0.792042
OSBPL10	-0.563124	6.76738	-3.7483	0.000604442	0.018022	-0.483955
GLCE	-0.562703	6.27457	-4.96512	1.55568e-05	0.00131422	2.96522
SETDB2	-0.561831	6.28445	-4.22356	0.000149275	0.0067112	0.827327
EDEM2	-0.561588	6.15101	-4.98694	1.45414e-05	0.00123175	3.02924
ABHD5	-0.560753	6.56383	-4.71151	3.39805e-05	0.00222938	2.22485
ZMYM6	-0.558649	6.96084	-4.88868	1.97005e-05	0.00153957	2.7413
TOR3A	-0.557918	5.49307	-4.28065	0.000125792	0.0059896	0.988527
LOC440498	-0.555695	5.67775	-5.55008	2.52078e-06	0.000339925	4.6938
SLC31A1	-0.554076	6.34285	-4.75266	2.99488e-05	0.00206397	2.34443
ICAM1	-0.553396	4.99031	-4.34729	0.000102932	0.00520891	1.17757
TMEM159	-0.552749	5.93254	-3.86241	0.000434113	0.0143454	-0.174673
FUT8	-0.552688	5.47257	-4.54067	5.72811e-05	0.00333973	1.7309
TMEM106B	-0.551882	6.53395	-3.60295	0.000916715	0.0239076	-0.871962
TYRO3	-0.545335	5.11162	-5.68394	1.65913e-06	0.000255449	5.09152
APP	-0.5442	6.39857	-4.66316	3.94076e-05	0.00250094	2.08461
ARHGAP28	-0.542746	5.04616	-4.09864	0.000216632	0.00883181	0.477073
VAMP5	-0.540177	7.77112	-4.51384	6.21554e-05	0.00355791	1.65373
IFI35	-0.540068	6.37262	-4.01749	0.000275449	0.0104435	0.251538
LOC653110	-0.539538	5.07692	-4.32979	0.000108506	0.0054093	1.12784
ST3GAL5	-0.53912	5.82733	-4.16193	0.000179453	0.00769335	0.654077
FMNL2	-0.537406	5.41762	-6.73758	6.22205e-08	2.67855e-05	8.21298
KCNT2	-0.536215	5.05637	-4.2388	0.000142615	0.00649292	0.870301
IQCK	-0.536213	6.02603	-5.39746	4.05906e-06	0.00048625	4.24097
ARPC1B	-0.535832	5.68675	-3.41241	0.00156771	0.0346705	-1.36964
RTP4	-0.53428	5.11711	-4.90492	1.87372e-05	0.00148696	2.78883
C6orf115	-0.533576	6.94034	-3.80147	0.000518262	0.0163359	-0.340319
C20orf199	-0.533137	7.57599	-3.88331	0.000408445	0.0137689	-0.117643
PARP9	-0.531972	5.92311	-5.018	1.32081e-05	0.00114337	3.12048
LPCAT3	-0.530293	6.16904	-4.91125	1.83748e-05	0.00147308	2.80734
TP53AP1	-0.527485	5.7149	-4.76282	2.90276e-05	0.00204076	2.37402
LOC643031	-0.525245	8.58757	-3.69881	0.000696993	0.0198944	-0.616833
MGC24103	-0.523081	5.27329	-3.42379	0.00151877	0.0338983	-1.3403
FYCO1	-0.522074	6.85108	-4.06936	0.000236286	0.00936384	0.395499
RAB7L1	-0.521468	5.76958	-5.37305	4.38006e-06	0.000502364	4.16864
SGSH	-0.521414	7.04221	-6.31796	2.29033e-07	6.4375e-05	6.97467
FGF2	-0.51985	6.42422	-3.76232	0.000580453	0.0175566	-0.446157
CTNS	-0.519541	5.58924	-4.44185	7.73386e-05	0.00416885	1.44731
CCDC14	-0.519002	7.13799	-4.01744	0.000275494	0.0104435	0.251386
HS1BP3	-0.518348	5.78143	-5.79077	1.1881e-06	0.000197236	5.4091
ST3GAL1	-0.518232	5.96302	-4.28701	0.00012341	0.00592104	1.00654
ANTXR1	-0.516153	7.25	-3.46552	0.00135146	0.03146	-1.23224
ERMP1	-0.513933	5.51165	-5.04257	1.224e-05	0.00108353	3.19271
ZDHHC14	-0.512388	5.6154	-3.35701	0.00182837	0.0380344	-1.51178
LOC642412	-0.512105	6.59301	-3.5126	0.00118396	0.0287443	-1.10958
ARG99	-0.512035	5.03243	-3.36595	0.00178371	0.0374949	-1.48894
PRIC285	-0.509383	6.00224	-4.04112	0.000256879	0.00995397	0.317044
SAT1	-0.508606	8.33892	-3.23434	0.00256076	0.0473658	-1.82219
LOC644615	-0.50857	6.24971	-3.68319	0.000728947	0.0204239	-0.658609
MPZL1	-0.507735	6.54156	-3.39123	0.00166286	0.0358749	-1.42413
NUCB2	-0.507679	7.984	-4.7099	3.41492e-05	0.00223578	2.22016
SC5DL	-0.507579	7.20493	-3.74423	0.000611568	0.0181827	-0.494893
CARHSP1	-0.506287	7.09313	-3.35844	0.00182118	0.0379777	-1.50814
LOC100130633	-0.505247	6.18022	-6.96961	3.04043e-08	1.56637e-05	8.8927
CPXM1	-0.504539	5.23005	-4.87951	2.02663e-05	0.00156763	2.71445
PLD3	-0.504112	6.91635	-4.26643	0.000131279	0.00618526	0.948305
RHBDD2	-0.503023	7.30896	-4.36901	9.64024e-05	0.00499101	1.23938
AGTRAP	-0.501124	5.77139	-6.80297	5.08308e-08	2.38419e-05	8.40495
PIK3IP1	-0.500858	6.72589	-4.35191	0.000101506	0.00517847	1.19072
GPR177	-0.498466	7.13833	-4.9001	1.90185e-05	0.00149228	2.7747
GATA2	-0.494246	5.1729	-3.83676	0.000467782	0.0151424	-0.244536
TTC39C	-0.49374	5.75563	-3.85299	0.000446194	0.0146216	-0.20035
PLXNB1	-0.492503	5.59394	-3.69199	0.00071077	0.0200869	-0.635078
TRIM2	-0.492415	5.99831	-4.82172	2.42174e-05	0.00179072	2.54565
SLC2A10	-0.491576	6.96482	-4.56279	5.35485e-05	0.00315097	1.7946
ELOVL5	-0.491368	7.47443	-5.04819	1.20286e-05	0.00108353	3.20924
STAT3	-0.491352	6.60155	-4.8746	2.05754e-05	0.00157955	2.70011
STAT5A	-0.491201	5.34847	-3.59565	0.000935947	0.0242692	-0.891268
AGPAT9	-0.491101	5.3407	-3.21593	0.00269234	0.048936	-1.86825
KIAA0182	-0.490948	5.80616	-4.4639	7.23376e-05	0.00396733	1.51043
LIPA	-0.490588	7.52078	-4.65444	4.04731e-05	0.00252864	2.05937
ZFP36L2	-0.490579	6.24825	-3.27713	0.00227825	0.0438972	-1.71463
WFS1	-0.490363	6.83818	-3.54657	0.0010757	0.0268721	-1.02058
MAPK10	-0.49002	5.22051	-5.4327	3.63648e-06	0.000444669	4.34545
HEBP1	-0.490004	8.11044	-4.21182	0.000154614	0.00686287	0.794248
C9orf103	-0.489888	5.92903	-4.94203	1.67078e-05	0.00137811	2.89752
RAB13	-0.488842	6.03488	-3.36046	0.00181101	0.0378913	-1.50297
B4GALT4	-0.487408	6.34949	-4.19751	0.00016137	0.00709467	0.754001
HEXB	-0.485855	8.46595	-4.24572	0.00013969	0.00642881	0.889813
IFIH1	-0.485657	5.35057	-3.58491	0.000964961	0.0248158	-0.919648
MAPRE3	-0.484881	5.82505	-4.67215	3.83371e-05	0.00246249	2.11067
KLHL24	-0.484601	6.54246	-3.22218	0.00264696	0.0483905	-1.85262
OSGIN2	-0.484313	5.68326	-5.02279	1.30134e-05	0.00113285	3.13457
BASP1	-0.483748	9.06624	-3.85908	0.000438356	0.01444	-0.183772
PLTP	-0.483709	5.77195	-3.37578	0.00173573	0.036956	-1.46376
GALM	-0.482226	5.65398	-4.8152	2.47087e-05	0.00181849	2.52662
KIAA0247	-0.481729	6.16341	-4.42541	8.12872e-05	0.00435927	1.4003
MANSC1	-0.481502	5.47802	-3.58277	0.000970833	0.0249464	-0.925287
TWIST2	-0.481022	5.64244	-3.30954	0.00208429	0.0414575	-1.63264
SPR	-0.480747	5.60127	-5.24497	6.52778e-06	0.000686093	3.78955
NT5DC1	-0.480424	5.57269	-3.4323	0.0014831	0.0334826	-1.31831
PICALM	-0.479476	6.44865	-3.67742	0.000741113	0.0206965	-0.674032
GRINA	-0.478636	6.8468	-4.24966	0.000138048	0.00640811	0.900952
CTSL1	-0.477359	7.97576	-3.74528	0.000609731	0.0181453	-0.492085
LGALS3	-0.476558	7.40487	-4.64781	4.13025e-05	0.00256516	2.04017
SLC35C1	-0.475525	6.39597	-4.75674	2.95758e-05	0.00206397	2.3563
LAMA3	-0.47545	5.04309	-3.59355	0.000941571	0.0243337	-0.896838
TMBIM1	-0.474773	6.56742	-3.70807	0.000678693	0.0195317	-0.59203
RNF24	-0.471149	6.23955	-3.77671	0.000556801	0.0171046	-0.407316
IFIT3	-0.470635	5.44758	-3.3538	0.0018447	0.0382146	-1.51999
LITAF	-0.470482	8.35247	-3.44219	0.00144267	0.0328778	-1.29272
CD46	-0.466511	6.84611	-3.62385	0.000863758	0.0231411	-0.816613
PSG1	-0.465925	4.71548	-3.3609	0.00180884	0.0378711	-1.50186
EPB41L5	-0.465487	5.57858	-3.83882	0.000464984	0.0150957	-0.238926
C1orf85	-0.465115	7.41937	-3.96275	0.000323638	0.0117387	0.10034
FLJ10081	-0.464262	6.7165	-6.59194	9.77023e-08	3.65523e-05	7.78437
SFRS5	-0.464001	7.35966	-3.88302	0.000408782	0.0137689	-0.118415
P2RY5	-0.455355	5.32502	-4.26458	0.000132006	0.00621022	0.9431
GRAMD4	-0.454745	5.4468	-4.19131	0.000164388	0.0072051	0.736563
PCNX	-0.45422	6.11757	-5.53957	2.6049e-06	0.000345407	4.6626
CLIP4	-0.452842	6.29373	-4.93412	1.71212e-05	0.00140851	2.87435
PRKCI	-0.452422	6.43686	-3.75677	0.000589838	0.0177211	-0.461128
TMX4	-0.450987	6.29142	-4.82045	2.43119e-05	0.00179349	2.54196
PDE4D	-0.450732	5.08258	-3.50808	0.00119914	0.0289357	-1.12139
SLC11A2	-0.448466	6.33122	-3.40345	0.00160729	0.0351582	-1.3927
LPIN1	-0.448321	7.46751	-3.26277	0.00236958	0.0450145	-1.75081
RALGDS	-0.447411	5.2355	-3.87526	0.000418147	0.0139525	-0.139613
FLJ10986	-0.446784	6.11296	-5.186	7.84194e-06	0.000785434	3.61535
ZBTB20	-0.446074	5.68664	-5.95402	7.13227e-07	0.000138357	5.89445
MYO6	-0.445668	5.49268	-3.49917	0.00122962	0.0294428	-1.14467
NEK6	-0.443239	6.16099	-4.16287	0.000178951	0.00768267	0.65671
TPP1	-0.443092	7.14938	-3.48222	0.00128961	0.0304849	-1.18883
NFKBIA	-0.441943	7.25	-3.322	0.00201402	0.0407288	-1.60102
SMAD3	-0.441156	7.30731	-3.73532	0.000627481	0.0185505	-0.518859
AQP11	-0.439672	5.26111	-3.61716	0.000880367	0.023415	-0.834332
SRGAP1	-0.438579	5.95221	-3.82934	0.00047798	0.0154061	-0.264698
SYNGR1	-0.437245	5.06843	-4.73776	3.13506e-05	0.00210069	2.30112
GLB1	-0.43694	7.20456	-5.18576	7.84784e-06	0.000785434	3.61463
SLC39A11	-0.436757	5.99185	-4.81148	2.49927e-05	0.00182476	2.5158
LOC283953	-0.435935	5.80035	-4.90336	1.88279e-05	0.00149032	2.78425
SDF4	-0.433643	6.87645	-5.16754	8.30507e-06	0.000825934	3.56086
CYB561	-0.432762	5.26864	-3.92621	0.000360272	0.012588	-0.000137848
TKT	-0.432313	7.6212	-3.39334	0.00165315	0.0357714	-1.41871
RERE	-0.432031	6.18481	-4.28926	0.000122578	0.00589011	1.01291
FAM21D	-0.431702	5.35134	-3.2084	0.00274795	0.0497448	-1.88703
PRICKLE2	-0.430875	6.34229	-4.06033	0.000242686	0.0095692	0.370402
KIAA1310	-0.430699	7.50125	-5.84223	1.01153e-06	0.000176602	5.56212
PRR5	-0.430326	4.92924	-3.99735	0.000292305	0.0109227	0.195819
TP53	-0.429995	6.17432	-3.29262	0.0021835	0.0426999	-1.6755
GNPDA1	-0.429024	7.31827	-3.54602	0.00107738	0.0268865	-1.02202
MBNL2	-0.42849	6.5988	-3.9515	0.000334507	0.0119951	0.069381
CTSD	-0.427554	6.48874	-3.59075	0.000949085	0.0245078	-0.904227
FBXL11	-0.427411	5.95069	-5.54979	2.52304e-06	0.000339925	4.69295
TAPBPL	-0.426793	5.39063	-3.71056	0.000673839	0.0194922	-0.585338
MPPE1	-0.423716	6.22331	-3.22764	0.00260794	0.0478443	-1.83898
PSMB10	-0.422663	7.65527	-4.30346	0.000117454	0.00568737	1.05315
CEBPB	-0.422065	8.36921	-3.96755	0.000319099	0.0116605	0.113581
BCL6	-0.421031	6.48352	-3.72832	0.00064028	0.0188227	-0.537696
XAF1	-0.419667	5.70386	-3.39635	0.00163937	0.0356039	-1.41097
SLC16A2	-0.418414	5.71383	-3.40601	0.00159591	0.0350476	-1.38613
GMPR	-0.417106	5.1685	-4.37213	9.54988e-05	0.00496879	1.24826
CLN5	-0.416001	6.22336	-4.75465	2.97662e-05	0.00206397	2.35023
CMYA5	-0.415251	4.82122	-5.66967	1.73482e-06	0.000260786	5.0491
LOC88523	-0.414807	6.92883	-3.45716	0.0013835	0.0319317	-1.25395
SREBF1	-0.414786	5.70699	-4.32576	0.00010983	0.00545035	1.11641
TMED4	-0.414239	6.98608	-4.94353	1.66309e-05	0.00137811	2.9019
STRADB	-0.413214	6.40488	-5.49197	3.02228e-06	0.000387666	4.52131
SMPD1	-0.412496	6.46311	-4.4182	8.3082e-05	0.00443283	1.37969
NBEA	-0.411659	5.40239	-3.66888	0.000759456	0.021065	-0.696809
RETSAT	-0.411371	5.1256	-4.12754	0.000198807	0.00831359	0.557771
ROBO1	-0.410577	5.34578	-3.45556	0.00138972	0.0319517	-1.2581
NARS2	-0.410385	6.20445	-4.23857	0.000142717	0.00649292	0.869625
TERF1	-0.410024	5.66904	-3.40197	0.00161393	0.0351689	-1.39651
WDR70	-0.409614	6.26929	-3.47162	0.00132855	0.031088	-1.2164
FTHL2	-0.409216	8.08679	-3.33254	0.00195632	0.0399217	-1.57421
MRC2	-0.407925	5.04189	-6.20444	3.26292e-07	7.77486e-05	6.63815
ATP6V1A	-0.407538	7.9591	-3.984	0.000304032	0.0112671	0.158932
ZCCHC9	-0.406324	7.04665	-4.5344	5.83851e-05	0.00337902	1.71286
HIBADH	-0.405827	7.53476	-4.61398	4.58029e-05	0.00279496	1.94233
BCL2L13	-0.40581	7.68151	-3.65984	0.000779374	0.0214848	-0.720921
TM7SF3	-0.405193	6.23255	-4.77524	2.79406e-05	0.00198656	2.41017
NEU1	-0.405173	6.27596	-3.67659	0.000742877	0.0206965	-0.676247
SELM	-0.403156	8.51367	-3.35427	0.00184232	0.0382146	-1.5188
LRPAP1	-0.40215	6.61311	-3.69502	0.000704624	0.0199976	-0.626984
BAT5	-0.400726	6.21068	-4.23035	0.000146274	0.00662364	0.84645
ZNF365	-0.398715	5.12509	-3.40209	0.00161341	0.0351689	-1.39621
PION	-0.395755	4.91973	-5.52525	2.72403e-06	0.000356689	4.62008
PRKAG1	-0.394875	5.57844	-3.42002	0.00153478	0.0341345	-1.35
DDX60	-0.394216	5.28184	-4.22151	0.000150194	0.00673325	0.821549
SLC25A29	-0.391987	5.13343	-4.07861	0.000229894	0.00920339	0.421255
LTBP3	-0.391925	5.35469	-3.81847	0.000493316	0.0158193	-0.29422
DDOST	-0.386984	7.8672	-4.32982	0.000108494	0.0054093	1.12795
PARP14	-0.386778	5.72197	-3.24213	0.002507	0.0467162	-1.80268
YIPF1	-0.386775	6.79068	-3.94687	0.00033909	0.0120956	0.0566314
TNPO1	-0.3853	6.05375	-4.26254	0.000132817	0.00622972	0.937332
LOC646817	-0.383732	5.11081	-4.01573	0.000276888	0.0104711	0.246649
CHP	-0.382887	8.04967	-6.21335	3.17351e-07	7.73483e-05	6.66457
PLEKHA6	-0.382628	4.76314	-3.34667	0.00188142	0.0387708	-1.53818
CDIPT	-0.382124	5.7869	-4.05674	0.000245278	0.00965611	0.360428
MITF	-0.381515	5.04443	-4.05643	0.000245505	0.00965611	0.359559
CES2	-0.380045	6.50637	-3.58904	0.000953718	0.0245995	-0.908754
GPX4	-0.379089	8.76523	-4.43407	7.91846e-05	0.00426105	1.42504
C3orf64	-0.377744	6.07605	-4.28108	0.000125628	0.0059896	0.989753
STAT2	-0.376875	7.67694	-3.90274	0.000385893	0.0131388	-0.0644773
SHISA5	-0.376552	7.86789	-4.77189	2.82302e-05	0.00199811	2.40041
GCH1	-0.375901	4.77572	-3.69273	0.000709255	0.0200793	-0.633089
CDRT4	-0.37526	5.658	-4.14225	0.000190289	0.00805931	0.598942
LOC100130707	-0.375099	6.24988	-3.44927	0.00141441	0.0324448	-1.27441
ARL4A	-0.372374	5.2698	-3.6055	0.00091009	0.0238536	-0.865217
GDE1	-0.372269	6.1414	-4.12612	0.000199645	0.00832103	0.553816
TLN2	-0.370445	5.14403	-4.58491	5.00545e-05	0.00300193	1.85839
LOC100133691	-0.369853	4.83271	-4.90983	1.84556e-05	0.00147579	2.80318
LOC390530	-0.36967	6.21669	-4.34902	0.000102397	0.00519912	1.18249
RARS2	-0.36956	7.04896	-3.55798	0.00104153	0.0263111	-0.990594
GTF2IRD1	-0.36919	5.04798	-4.03812	0.00025917	0.0100057	0.308708
P2RX4	-0.368249	5.41714	-3.96369	0.00032274	0.0117387	0.102947
LOC100132717	-0.368223	6.16548	-4.34848	0.000102562	0.00519912	1.18097
PPP3CA	-0.367164	6.02521	-5.56477	2.40773e-06	0.000335138	4.73743
ACSS2	-0.366896	6.15165	-3.59716	0.00093195	0.0242245	-0.887288
NAGPA	-0.366218	5.77598	-4.75357	2.98652e-05	0.00206397	2.34708
TMEM116	-0.36559	5.54468	-3.4228	0.00152293	0.0339429	-1.34283
SIL1	-0.36524	6.31817	-3.92485	0.000361705	0.012588	-0.00385719
C1orf188	-0.364364	4.87155	-4.41301	8.43972e-05	0.00449537	1.36486
NRIP1	-0.363488	6.48568	-3.30211	0.00212732	0.0419193	-1.65148
CD99L2	-0.363042	7.24801	-3.95621	0.000329911	0.011876	0.0823494
APOBEC3G	-0.361936	5.25898	-3.45944	0.0013747	0.0317984	-1.24804
BTN3A3	-0.361754	5.42968	-3.27344	0.00230139	0.0441555	-1.72393
PANX1	-0.361501	5.63459	-4.36475	9.765e-05	0.00502719	1.22725
CRY2	-0.361435	5.85723	-4.0623	0.000241275	0.0095255	0.375879
ANO10	-0.361355	6.19606	-3.84559	0.000455915	0.0148626	-0.220506
RBMS1	-0.361319	6.4493	-3.93779	0.000348244	0.012269	0.0316712
PRDX6	-0.359137	8.56182	-3.61635	0.000882403	0.0234408	-0.836482
ZEB1	-0.358788	5.0455	-5.3653	4.4872e-06	0.000510923	4.14567
KLHL21	-0.358643	5.66127	-3.8587	0.000438838	0.0144407	-0.184799
HLA-E	-0.357682	7.65984	-3.77605	0.000557871	0.0171208	-0.409108
CLCN7	-0.356981	7.45165	-3.98894	0.000299639	0.0111306	0.172579
FTHL12	-0.356352	9.31142	-4.67058	3.85222e-05	0.00246557	2.10612
DHX58	-0.355861	5.1172	-4.55939	5.41065e-05	0.00316639	1.7848
LOC389599	-0.354215	6.27576	-4.74111	3.10301e-05	0.00209148	2.31085
TST	-0.353666	7.42382	-4.1355	0.000194154	0.00814615	0.580038
CHPT1	-0.352846	6.99771	-4.18579	0.000167122	0.00727421	0.721043
PSD3	-0.352068	5.01603	-4.46018	7.31586e-05	0.00399146	1.49977
LGALS3BP	-0.35204	6.8676	-3.48326	0.00128586	0.0304288	-1.18613
TMEM144	-0.351747	4.99206	-3.83108	0.000475574	0.0153516	-0.259981
ALPK1	-0.351417	5.2497	-3.32673	0.00198789	0.0404085	-1.58898
ISCU	-0.351	7.46265	-3.62174	0.00086897	0.0232411	-0.82221
DPP7	-0.3506	5.49532	-3.77907	0.000553017	0.0170795	-0.400948
BSDC1	-0.349129	6.49366	-3.49044	0.00126017	0.0300401	-1.16743
LOC728153	-0.346586	5.86309	-3.43966	0.00145292	0.0330147	-1.29928
C20orf3	-0.346175	6.83402	-4.87893	2.03025e-05	0.00156763	2.71276
SLC25A28	-0.345603	6.98276	-3.23411	0.00256241	0.0473683	-1.82278
RBPJ	-0.34549	5.74436	-3.87621	0.000416993	0.0139409	-0.137026
LBA1	-0.343957	5.3139	-3.56571	0.00101897	0.0258869	-0.970252
CNIH	-0.342406	7.9489	-4.80572	2.54405e-05	0.0018464	2.49897
LOC392437	-0.342272	9.08644	-3.72306	0.000650039	0.0190681	-0.551805
ACVR1B	-0.339888	5.42198	-3.55031	0.00106438	0.0266953	-1.01075
PPAPDC2	-0.338853	5.76757	-4.0262	0.000268457	0.0102885	0.275665
SLC38A2	-0.338369	8.68385	-4.04849	0.000251341	0.00980509	0.337503
FCGRT	-0.338067	6.91134	-3.85951	0.000437803	0.0144369	-0.18259
FAH	-0.337612	5.69279	-4.09645	0.000218046	0.00885651	0.470962
LAPTM4A	-0.337332	7.4177	-4.12298	0.000201518	0.00838795	0.545041
TPBG	-0.336873	6.48313	-3.27155	0.00231334	0.0443016	-1.7287
PARP12	-0.336861	5.63987	-3.39334	0.00165313	0.0357714	-1.4187
PREB	-0.336617	5.6633	-3.60404	0.000913889	0.0238685	-0.869091
PLEKHA5	-0.336167	5.39481	-3.23602	0.00254909	0.0472054	-1.81799
RP9P	-0.334394	5.33646	-3.34673	0.00188115	0.0387708	-1.53805
SLC9A7	-0.333759	5.00372	-3.89698	0.000392443	0.0133185	-0.0802331
PTPRU	-0.332434	4.96007	-3.68307	0.000729194	0.0204239	-0.658926
PKN2	-0.331537	5.70805	-6.47476	1.40591e-07	4.65074e-05	7.43855
RXRA	-0.331104	6.69181	-3.65039	0.000800718	0.0218812	-0.746078
CASK	-0.330864	5.45074	-3.6197	0.000874019	0.0233166	-0.8276
FAM45A	-0.330709	7.54187	-4.56284	5.35397e-05	0.00315097	1.79475
TMX1	-0.330437	6.89805	-3.44363	0.0014369	0.0328169	-1.28901
PRRT3	-0.329959	5.87719	-4.12034	0.000203105	0.00843168	0.537666
APRT	-0.329823	6.38845	-3.88595	0.0004053	0.0136809	-0.110409
STIM2	-0.329701	5.37349	-3.80933	0.000506588	0.0160808	-0.319029
NCK1	-0.325774	7.17001	-3.78579	0.00054236	0.0168629	-0.382774
C6orf89	-0.325636	5.75794	-4.81208	2.49469e-05	0.00182476	2.51753
SLC39A6	-0.325287	6.09498	-3.82122	0.000489398	0.0157097	-0.286765
DNASE2	-0.324427	6.79453	-3.40786	0.0015877	0.0349651	-1.38136
CCRK	-0.323071	5.39183	-3.65537	0.000789411	0.0216475	-0.732836
RBM43	-0.3224	5.34721	-3.61566	0.000884158	0.0234675	-0.83833
FGGY	-0.322356	5.49226	-3.82892	0.000478567	0.0154093	-0.265845
TRIM25	-0.322211	5.45418	-3.86416	0.000431906	0.0142896	-0.169904
ARSA	-0.321856	5.37312	-3.77881	0.000553433	0.0170795	-0.40165
NUMA1	-0.320608	5.67399	-3.31796	0.00203653	0.0410519	-1.61127
OSBPL3	-0.319733	5.1668	-3.37341	0.0017472	0.0370546	-1.46984
SLC44A3	-0.319698	4.98316	-3.83714	0.000467264	0.0151424	-0.243498
C4orf36	-0.319685	4.76868	-5.04737	1.20593e-05	0.00108353	3.20682
TMEM205	-0.317628	7.1632	-4.29541	0.000120334	0.00580003	1.03032
XRN2	-0.317569	5.70757	-4.07991	0.000229011	0.00917973	0.424869
WDR81	-0.317493	5.29699	-5.08454	1.07463e-05	0.000999153	3.31622
TRAM1	-0.316988	9.39601	-4.17504	0.000172573	0.00745981	0.690848
GBA	-0.316176	6.55113	-3.35604	0.00183332	0.0380854	-1.51428
JDP2	-0.315221	5.47075	-3.41699	0.00154784	0.0343946	-1.35784
TMEM111	-0.314417	7.76727	-4.36774	9.67724e-05	0.00499371	1.23577
FBXO6	-0.313939	5.51744	-3.79422	0.000529272	0.0165501	-0.359957
MTA3	-0.313726	6.57649	-4.04867	0.000251207	0.00980509	0.338002
SEMA4B	-0.313164	5.10627	-3.2331	0.00256945	0.0473784	-1.82531
RND2	-0.312607	5.02327	-3.33276	0.00195514	0.0399217	-1.57365
KIAA0146	-0.312382	5.39109	-3.89485	0.000394897	0.0133873	-0.0860692
GSR	-0.309073	5.48954	-3.48521	0.00127884	0.0303084	-1.18106
ACACB	-0.308179	4.95611	-4.0955	0.000218661	0.00886663	0.468316
LRRK1	-0.307542	5.10854	-4.24467	0.00014013	0.00642881	0.886851
ALG6	-0.307089	5.99583	-3.64462	0.000814044	0.0220917	-0.761444
ETFB	-0.306982	6.53061	-3.67675	0.000742528	0.0206965	-0.67581
TMEM9B	-0.306968	6.96636	-3.32007	0.00202474	0.0408867	-1.60592
SMYD4	-0.305837	5.60439	-4.18436	0.000167837	0.00728514	0.717027
MAPK12	-0.305589	5.36485	-4.91479	1.81749e-05	0.00146311	2.81771
FVT1	-0.304096	6.84127	-3.35694	0.00182874	0.0380344	-1.51197
C5orf62	-0.304038	5.71592	-3.28323	0.00224045	0.0435426	-1.69922
TMEM135	-0.302822	5.49259	-3.76595	0.000574403	0.0174472	-0.436376
TMEM60	-0.301537	7.31495	-4.17748	0.000171318	0.00742599	0.697714
EFEMP2	-0.301392	8.15598	-4.6608	3.96935e-05	0.00250988	2.07777
ANXA5	-0.300538	9.06764	-4.40556	8.63202e-05	0.00458226	1.3436

## Sheet: Table S9
ID	Description	GeneRatio	BgRatio	pvalue	p.adjust	qvalue	geneID	Count	Cluster	group
HALLMARK_INTERFERON_GAMMA_RESPONSE	HALLMARK_INTERFERON_GAMMA_RESPONSE	37/230	195/4171	8.66474e-12	4.07243e-10	2.91865e-10	C1S/C1R/CFH/UBE2L6/ISOC1/LY6E/RTP4/STAT3/CASP1/DHX58/VAMP5/ICAM1/PSMB10/DDX60/ST3GAL5/PIM1/NAMPT/IFI35/SOD2/CASP4/STAT2/TRIM25/MX1/IFIT1/GCH1/HERC6/VCAM1/ARL4A/IFIH1/LGALS3BP/IL18BP/XAF1/PARP12/IFIT3/NFKBIA/PARP14/SLC25A28	37	CAF2vsCAF1 (590)	CAF2vsCAF1 (590)
HALLMARK_INTERFERON_ALPHA_RESPONSE	HALLMARK_INTERFERON_ALPHA_RESPONSE	23/230	91/4171	2.8613e-10	6.72405e-09	4.81903e-09	C1S/TMEM140/UBE2L6/LY6E/GBP2/PARP9/RTP4/CASP1/DHX58/GMPR/DDX60/IFI35/STAT2/TRIM25/IFITM1/MX1/HERC6/IFIH1/LGALS3BP/PARP12/IFIT3/PARP14/SLC25A28	23	CAF2vsCAF1 (590)	CAF2vsCAF1 (590)
HALLMARK_REACTIVE_OXYGEN_SPECIES_PATHWAY	HALLMARK_REACTIVE_OXYGEN_SPECIES_PATHWAY	11/230	44/4171	1.71565e-05	0.000268785	0.000192634	PRNP/TXNRD1/GCLM/GCLC/GLRX/GPX4/SOD2/MGST1/PRDX6/HHEX/GSR	11	CAF2vsCAF1 (590)	CAF2vsCAF1 (590)
HALLMARK_EPITHELIAL_MESENCHYMAL_TRANSITION	HALLMARK_EPITHELIAL_MESENCHYMAL_TRANSITION	25/230	195/4171	5.05336e-05	0.000593769	0.000425546	FBLN1/LAMA2/TGM2/FBLN5/DCN/SFRP1/EFEMP2/FBN2/ITGA2/COL6A3/SGCD/BASP1/IL32/FGF2/VCAM1/IGFBP3/TGFBR3/LAMA3/GJA1/PMP22/WNT5A/PCOLCE/SLIT2/SAT1/LUM	25	CAF2vsCAF1 (590)	CAF2vsCAF1 (590)
HALLMARK_XENOBIOTIC_METABOLISM	HALLMARK_XENOBIOTIC_METABOLISM	23/230	196/4171	0.00039159	0.00368095	0.00263808	TPST1/FBLN1/ABCC3/PTGDS/NINJ1/CYP27A1/GCLC/CYB5A/ELOVL5/GABARAPL1/PTGES/MAN1A1/PSMB10/RETSAT/FAH/CROT/GCH1/VTN/EPHX1/TMEM176B/GSR/PAPSS2/JUP	23	CAF2vsCAF1 (590)	CAF2vsCAF1 (590)
HALLMARK_TNFA_SIGNALING_VIA_NFKB	HALLMARK_TNFA_SIGNALING_VIA_NFKB	21/230	196/4171	0.00227668	0.017834	0.0127814	DRAM1/ABCA1/SQSTM1/CEBPD/IL6ST/NINJ1/NFE2L2/PANX1/ICAM1/DUSP5/NAMPT/SOD2/CEBPB/SMAD3/BCL6/GCH1/STAT5A/IFIH1/LITAF/NFKBIA/SAT1	21	CAF2vsCAF1 (590)	CAF2vsCAF1 (590)
HALLMARK_ADIPOGENESIS	HALLMARK_ADIPOGENESIS	20/230	186/4171	0.00276879	0.0185905	0.0133235	LAMA4/ABCA1/SCARB1/LPCAT3/STOM/GPX4/ME1/TST/RETSAT/FAH/BCL6/ETFB/BCL2L13/ARL4A/PREB/STAT5A/COL15A1/TKT/PPARG/CMBL	20	CAF2vsCAF1 (590)	CAF2vsCAF1 (590)
HALLMARK_COMPLEMENT	HALLMARK_COMPLEMENT	19/230	194/4171	0.00964649	0.0566732	0.0406168	C1S/C1R/CFH/CTSB/DPP4/ZEB1/CASP1/LIPA/LGALS3/ANXA5/ME1/CTSH/DUSP5/PIM1/CEBPB/CASP4/CD46/CTSD/APOBEC3G	19	CAF2vsCAF1 (590)	CAF2vsCAF1 (590)
HALLMARK_ESTROGEN_RESPONSE_LATE	HALLMARK_ESTROGEN_RESPONSE_LATE	18/230	195/4171	0.0204293	0.105418	0.0755514	PERP/ASS1/IL6ST/SCARB1/NBL1/ELOVL5/SEMA3B/PTGES/IMPA2/CHPT1/TST/MDK/PLXNB1/ETFB/WFS1/PAPSS2/NRIP1/TPBG	18	CAF2vsCAF1 (590)	CAF2vsCAF1 (590)
HALLMARK_INFLAMMATORY_RESPONSE	HALLMARK_INFLAMMATORY_RESPONSE	18/230	197/4171	0.0224293	0.105418	0.0755514	ABCA1/PTGER2/LY6E/RTP4/SLC31A1/ADM/BDKRB1/ICAM1/NAMPT/KCNJ2/P2RX4/IFITM1/GCH1/PDPN/ACVR1B/SLC11A2/NFKBIA/TPBG	18	CAF2vsCAF1 (590)	CAF2vsCAF1 (590)
HALLMARK_APOPTOSIS	HALLMARK_APOPTOSIS	15/230	158/4171	0.0263367	0.11253	0.0806484	SQSTM1/IGFBP6/DCN/CASP1/APP/LGALS3/GPX4/RETSAT/SOD2/CASP4/GCH1/TGFBR3/GSR/SAT1/LUM	15	CAF2vsCAF1 (590)	CAF2vsCAF1 (590)
HALLMARK_ESTROGEN_RESPONSE_EARLY	HALLMARK_ESTROGEN_RESPONSE_EARLY	17/230	189/4171	0.0298889	0.112984	0.0809738	DHRS3/RHOBTB3/TGM2/IL6ST/SCARB1/NBL1/ELOVL5/SEMA3B/PTGES/SYNGR1/CHPT1/SLC39A6/WFS1/GJA1/PAPSS2/NRIP1/TPBG	17	CAF2vsCAF1 (590)	CAF2vsCAF1 (590)
HALLMARK_P53_PATHWAY	HALLMARK_P53_PATHWAY	17/230	190/4171	0.0312508	0.112984	0.0809738	PERP/DRAM1/NINJ1/STOM/TM7SF3/CASP1/APP/RETSAT/RALGDS/RXRA/ISCU/EPHX1/CTSD/ACVR1B/ZNF365/TP53/SAT1	17	CAF2vsCAF1 (590)	CAF2vsCAF1 (590)
HALLMARK_BILE_ACID_METABOLISM	HALLMARK_BILE_ACID_METABOLISM	11/230	112/4171	0.0430912	0.142574	0.10218	ALDH1A1/ABCA1/GCLM/ISOC1/CYP27A1/RETSAT/CROT/HSD17B6/RBP1/RXRA/DIO2	11	CAF2vsCAF1 (590)	CAF2vsCAF1 (590)
HALLMARK_ANGIOGENESIS	HALLMARK_ANGIOGENESIS	5/230	36/4171	0.0455022	0.142574	0.10218	APP/LRPAP1/TNFRSF21/VTN/LUM	5	CAF2vsCAF1 (590)	CAF2vsCAF1 (590)
HALLMARK_CHOLESTEROL_HOMEOSTASIS	HALLMARK_CHOLESTEROL_HOMEOSTASIS	7/230	72/4171	0.0998063	0.289765	0.20767	ANTXR2/SEMA3B/LGALS3/ANXA5/FBXO6/ACSS2/PPARG	7	CAF2vsCAF1 (590)	CAF2vsCAF1 (590)
HALLMARK_IL6_JAK_STAT3_SIGNALING	HALLMARK_IL6_JAK_STAT3_SIGNALING	8/230	87/4171	0.104809	0.289765	0.20767	IL6ST/STAT3/LTBR/PIM1/STAT2/ACVRL1/TNFRSF21/ACVR1B	8	CAF2vsCAF1 (590)	CAF2vsCAF1 (590)
[truncated: 30 more rows]

[truncated: 9 more sheets: Table S10, Table S11, Table S12, Table S13, Table S14, Table S15, Table S16, Table S17, Table S18]
